# Supplementary material for: Stabilising fleeting intermediates of stilbene photocyclization with amino-borane functionalisation: the rare isolation of persistent dihydrophenanthrenes and their [1,5] H-shift isomers
Source: PubMed Central journal article supplement — Chem Sci. 2018 Mar 27;9(15):3844–55. doi: 10.1039/c8sc00560e (PMC5946680; doi:10.1039/c8sc00560e), 2018-03-27
Supplement: SC-009-C8SC00560E-s001.pdf [file SC-009-C8SC00560E-s001.pdf]

## Supporting Information for

# Stabilizing Fleeting Intermediates of Stilbene Photocyclization with Amino-Borane Functionalization: The Rare Isolation of Persistent Dihydrophenanthrenes and Their [1,5] H-Shift Isomers

Yong-gang Shi,<sup>a§</sup> Soren K. Mellerup,<sup>b§</sup> Kang Yuan,<sup>b</sup> Guo-Fei Hu,<sup>a</sup> Françoise Sauriol,<sup>b</sup> Tai Peng,<sup>a</sup> Nan Wang,<sup>\*a</sup> Pangkuan Chen,<sup>\*a</sup> and Suning Wang<sup>\*ab</sup>

## Contents

- S1. Starting Material Synthesis
- S2. NMR Photo- and Thermal Isomerization Data of *E-1a – E-9a*
- S3. Stability of **1b – 4b** Under Ambient Conditions
- S4. Stability of **1c – 4c** Under Ambient Conditions
- S5. UV-Vis and Fluorescence Photoisomerization Data of *E-1a-E-9a*, **1d-4d**, and **6d**
- S6. H/D Exchange and Kinetic Data
- S7. Characterization Data
- S8. DFT Calculation Data of *E-1a-E-9a*, *Z-1a-Z-9a*, **1b-4b**, **1c-4c**, **1d-4d**, and **6d**
- S9. Crystal Structure Data
- S10. References

## S1. Starting Material Synthesis

### 1.1 Synthesis of pre-*E*-8a

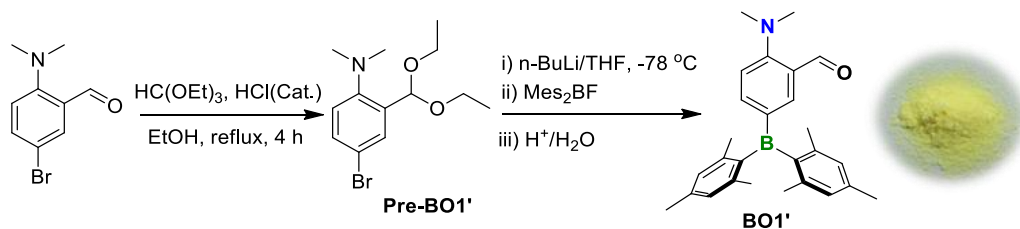

5-bromo-2-(dimethylamino)benzaldehyde (0.5 g, 2.19 mmol) and triethyl orthoformate (1.2 mL, 7.23 mmol) were dissolved in ethanol (10 mL), and then a catalytic amount of concentrated HCl (31  $\mu\text{L}$ ) was added to it. The resultant solution was refluxed for 4 h. After all the starting compound had been consumed, the reaction mixture was brought to room temperature and extracted with a water/ethyl acetate mixture. The combined organic layer was washed with brine and dried over anhydrous  $\text{Na}_2\text{SO}_4$ . Removing the volatiles under reduced pressure afforded 4-bromo-2-(diethoxymethyl)-*N,N*-dimethylaniline as a pale yellow liquid. Yield: 0.658 g, 99%.  $^1\text{H NMR}$  (400 MHz,  $\text{CDCl}_3$ )  $\delta$  7.71 (s, 1H), 7.37 (d,  $J = 8.5$  Hz, 1H), 6.99 (d,  $J = 8.5$  Hz, 1H), 5.76 (s, 1H), 3.72 – 3.63 (m, 2H), 3.55 – 3.46 (m, 2H), 2.70 (s, 6H), 1.22 (t,  $J = 7.0$  Hz, 6H). To an oven-dried Schlenk flask was added 4-bromo-2-(diethoxymethyl)-*N,N*-dimethylaniline (0.65 g, 2.15 mmol) and the flask was evacuated and back-filled with  $\text{N}_2$  three times, and then dried THF (10 mL) was injected into the mixture, then cooled to  $-78\text{ }^\circ\text{C}$  (acetone and liquid  $\text{N}_2$ ).  $n\text{-BuLi}$  [1.5 mL (1.6 M solution in hexane), 2.37 mmol] was added over 30 min. After 1 h, a solution of  $\text{Mes}_2\text{BF}$  (0.636 g, 2.37 mmol) in 4 mL of dry THF was added over 10 min. The reaction mixture was allowed to warm to room temperature, and stirring was continued for 12 h. After 12 h, 8 mL of 1 N HCl was added and stirring was continued for an additional 4 h and extracted with ether. The combined organic layers were washed with a brine solution and dried over anhydrous  $\text{Na}_2\text{SO}_4$ . After removing the solvents at reduced pressure, the crude product was purified by silica gel chromatography (PE/EA = 10/1). Compound **BO1'** as a yellow solid in 58 % yield (0.501 g, 1.3 mmol).  $^1\text{H NMR}$  (400 MHz,  $\text{C}_6\text{D}_6$ )  $\delta$  9.71 (s, 1H), 8.21 (s, 1H), 7.69 (d,  $J = 8.5$  Hz, 1H), 6.85 (s, 4H), 6.45 (d,  $J = 8.5$  Hz, 1H), 2.39 (s, 6H), 2.22 (s, 18H).  $^{13}\text{C NMR}$  (101 MHz,  $\text{C}_6\text{D}_6$ )  $\delta$  189.19, 155.60, 146.18, 143.12, 142.13, 140.98, 138.58, 134.46, 128.93, 124.83, 115.33, 43.42, 23.83, 21.32.  $^{11}\text{B NMR}$  (225 MHz,  $\text{C}_6\text{D}_6$ )  $\delta$  71.39. HR-ESIMS ( $m/z$ ):  $[\text{M}+\text{H}]^+$  calcd. for  $\text{C}_{27}\text{H}_{33}\text{BNO}$ , 398.2650; found 398.2658.

### 1.2 Synthesis of pre-*E*-9a

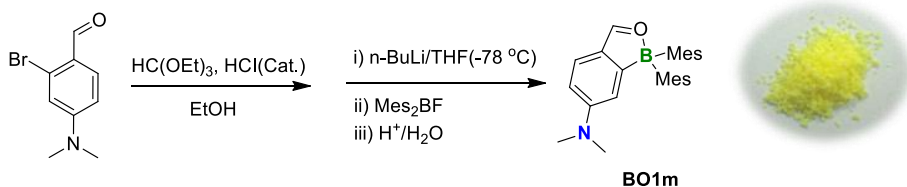

2-bromo-4-(dimethylamino)benzaldehyde (1.415 g, 6.21 mmol), and triethyl orthoformate (3.4 mL, 20.49 mmol) were dissolved in ethanol (28 mL), and then a catalytic amount of concentrated HCl (90  $\mu\text{L}$ ) was added to it. The resultant solution was refluxed for 4 h. After the removal of the solvent, the product was dissolved in THF (120 mL) and  $n\text{-BuLi}$  (1.6 M solution in hexane, 4.27 mL, 6.83 mmol) was added dropwise at  $-78\text{ }^\circ\text{C}$ . The mixture was stirred for 1 h at  $-78\text{ }^\circ\text{C}$  and  $\text{BMes}_2\text{F}$  (1.83 g, 6.83 mmol) in THF (30 mL) was added, the solution was stirred at  $-78\text{ }^\circ\text{C}$  for 1

hrs, then warmed to room temperature and stirred for 12 hrs. The HCl (3 mL, 1 M) was added to the mixture, and the solution was stirred at room temperature for 4 hrs and extracted with ethyl acetate. The combined organic layers were washed with a brine solution and dried over anhydrous Na<sub>2</sub>SO<sub>4</sub>. After removing the solvents at reduced pressure, the crude product was purified by silica gel chromatography (PE/EA = 10/1). Compound **BO1m** as a yellow solid in 54 % yield (1.34 g, 3.38 mmol). <sup>1</sup>H NMR (400 MHz, CD<sub>2</sub>Cl<sub>2</sub>) δ 9.05 (s, 1H), 7.80 (d, *J* = 8.9 Hz, 1H), 7.06 (s, 1H), 6.67 (d, *J* = 8.9 Hz, 1H), 6.61 (s, 4H), 3.11 (s, 6H), 2.17 (s, 6H), 2.02 (s, 12H). <sup>13</sup>C NMR (101 MHz, CD<sub>2</sub>Cl<sub>2</sub>) δ 188.63, 156.05, 141.00, 134.29, 131.21, 129.50, 129.08, 112.94, 112.10, 40.58, 24.65, 20.81. <sup>11</sup>B NMR (225 MHz, CD<sub>2</sub>Cl<sub>2</sub>) δ 13.61. HR-ESIMS (*m/z*): [M+H]<sup>+</sup> calcd. for C<sub>27</sub>H<sub>33</sub>BNO, 398.2650; found 398.2666.

## 1.2 Synthesis of Compound NP

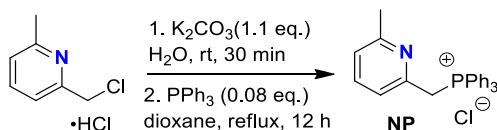

(Chloromethyl)pyridine hydrochloride<sup>1</sup> (1.164 g, 6.5 mmol) was dissolved in water (3 mL). Potassium carbonate (0.948 g, 6.86 mmol) was added portionwise and the solution was stirred for 30 minutes. The solution was diluted by the addition of Et<sub>2</sub>O and the biphasic system was extracted with Et<sub>2</sub>O (× 3). The organic layers were combined, dried (Na<sub>2</sub>SO<sub>4</sub>), and concentrated in vacuo. The resulting crude product was dissolved in dioxane (8 mL) and triphenylphosphine (1.36 g, 5.2 mmol) was added. The solution was heated at reflux for 12 hours then cooled to room temperature. The solution was filtered and the solid was then dried under high vacuum for 1 hour to afford the corresponding ylide compound **NP**.

## 1.3 Synthesis of Compound CP

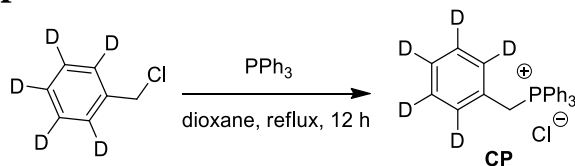

1-(Chloromethyl)benzene-2,3,4,5,6-*d*<sup>5</sup> (0.091 g, 0.69 mmol) was dissolved in dioxane (2 mL) and triphenylphosphine (0.181 g, 0.69 mmol) was added. The solution was heated at reflux for 12 hours then cooled to room temperature. The solution was filtered and the solid was then dried under high vacuum for 1 hour to afford the corresponding ylide compound **CP**.

## S2. NMR Photo- and Thermal Isomerization Data of *E*-1a – *E*-9a

### 2.1 NMR Photo/Thermal Isomerization Data of *E*-1a

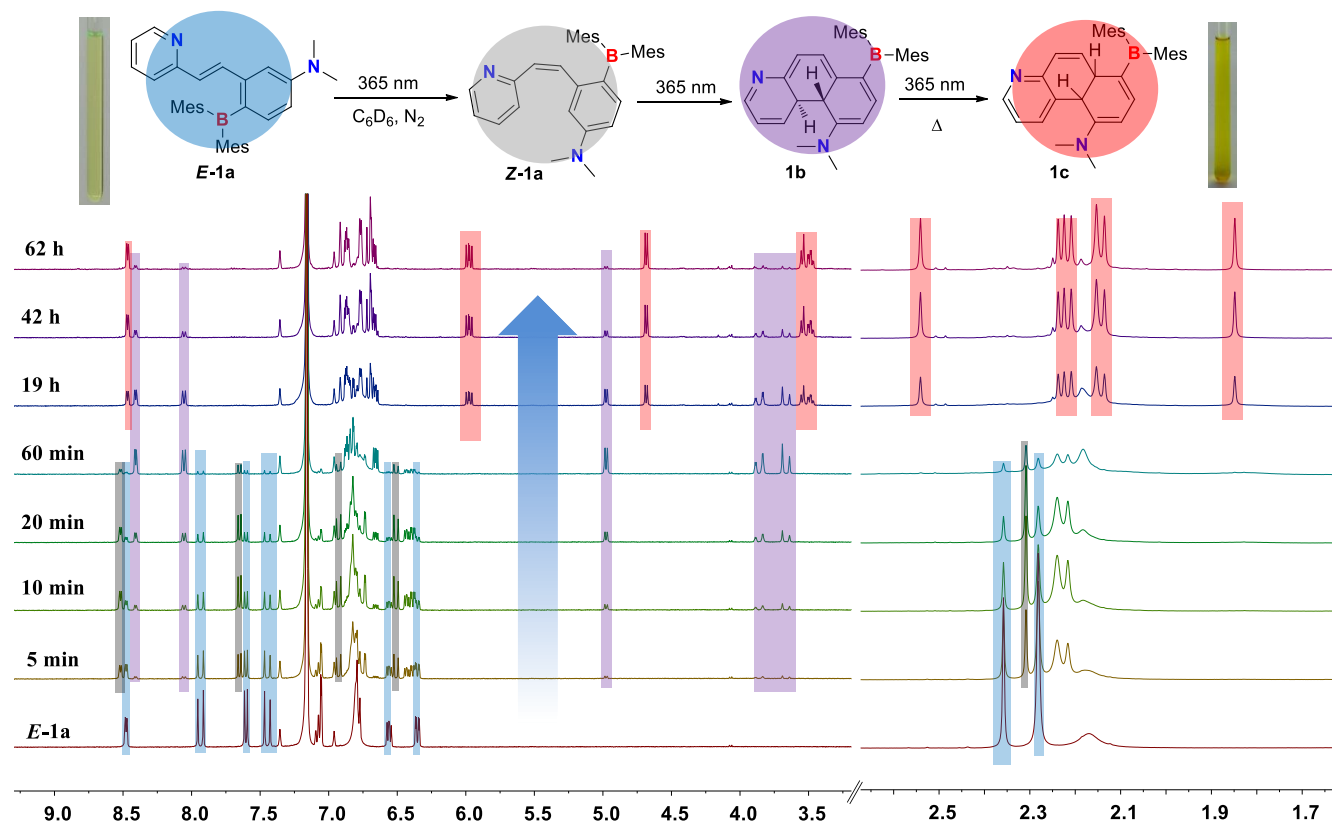

**Figure S1.**  $^1\text{H}$  NMR spectra showing the clean conversion of *E*-1a (blue highlight) to 1c (red highlight) in  $\text{C}_6\text{D}_6$  under 365 nm irradiation (70 °C).

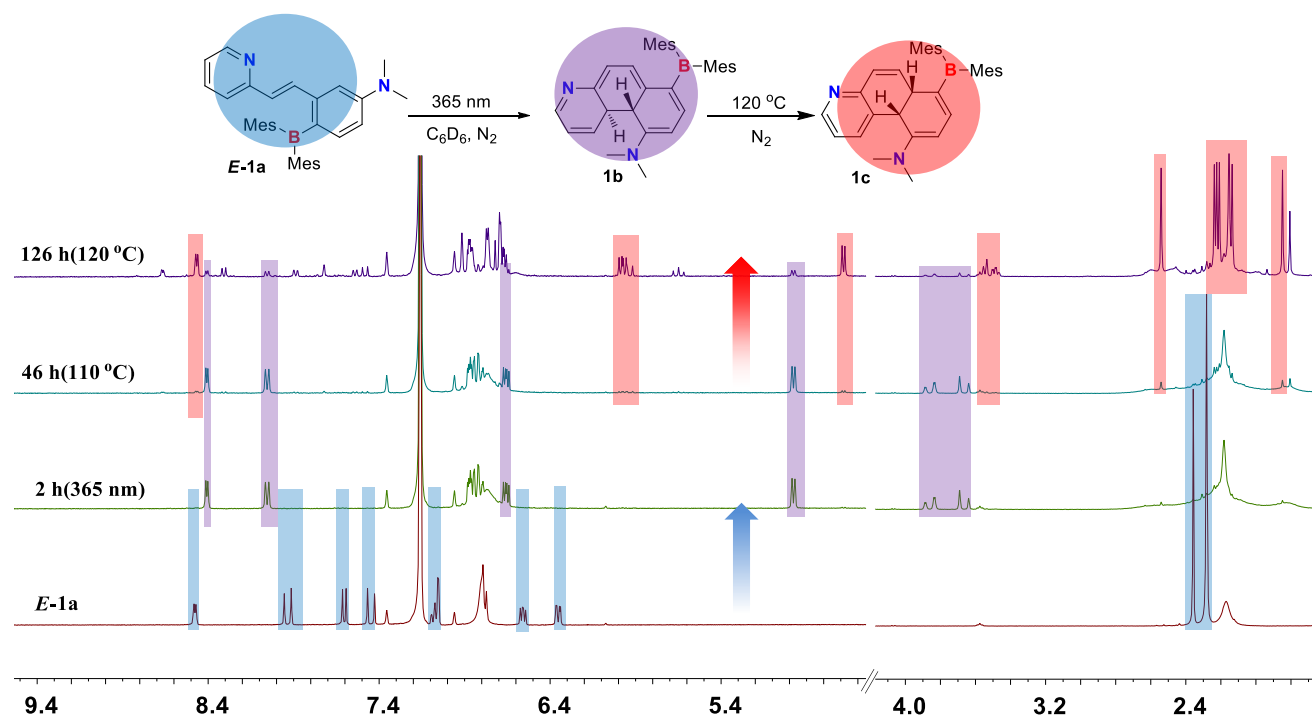

**Figure S2.**  $^1\text{H}$  NMR spectra showing the clean conversion of *E*-1a (blue highlight) to 1c (purple highlight) in  $\text{C}_6\text{D}_6$  first under 365 nm irradiation, followed by heating to 120 °C.

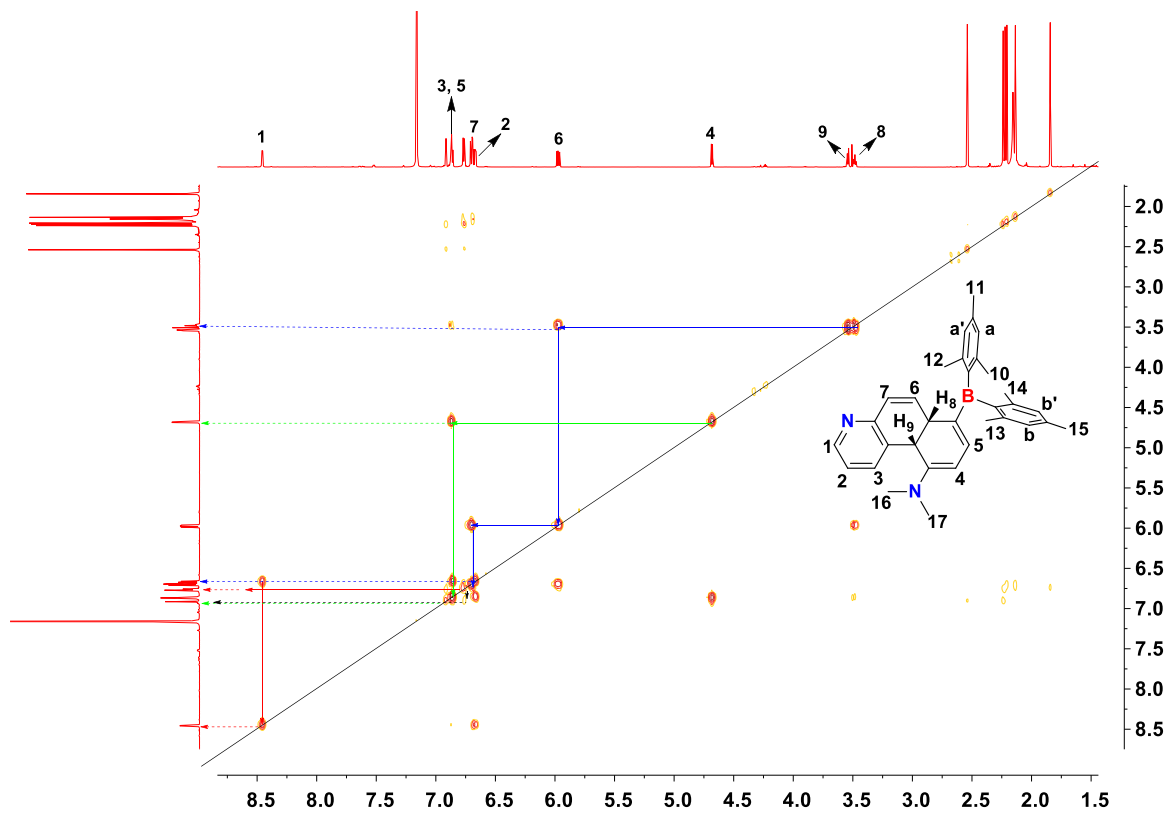

Figure S3. Partial  $^1\text{H}$ - $^1\text{H}$  COSY NMR spectrum of **1c** in  $\text{C}_6\text{D}_6$  at r.t.

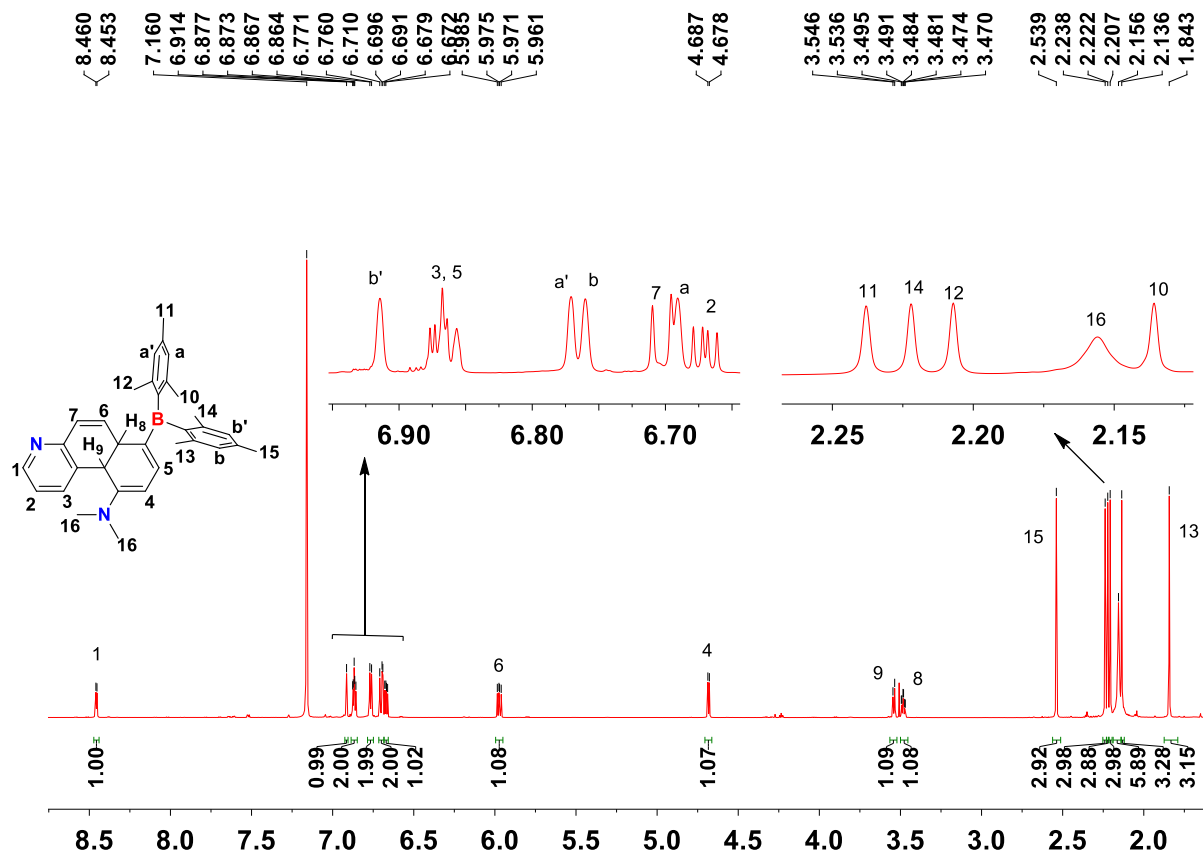

Figure S4.  $^1\text{H}$  NMR ( $\text{C}_6\text{D}_6$ , 700 MHz) spectra of compound **1c**.

## 2.2 NMR Photo/Thermal Isomerization Data of *E*-2a

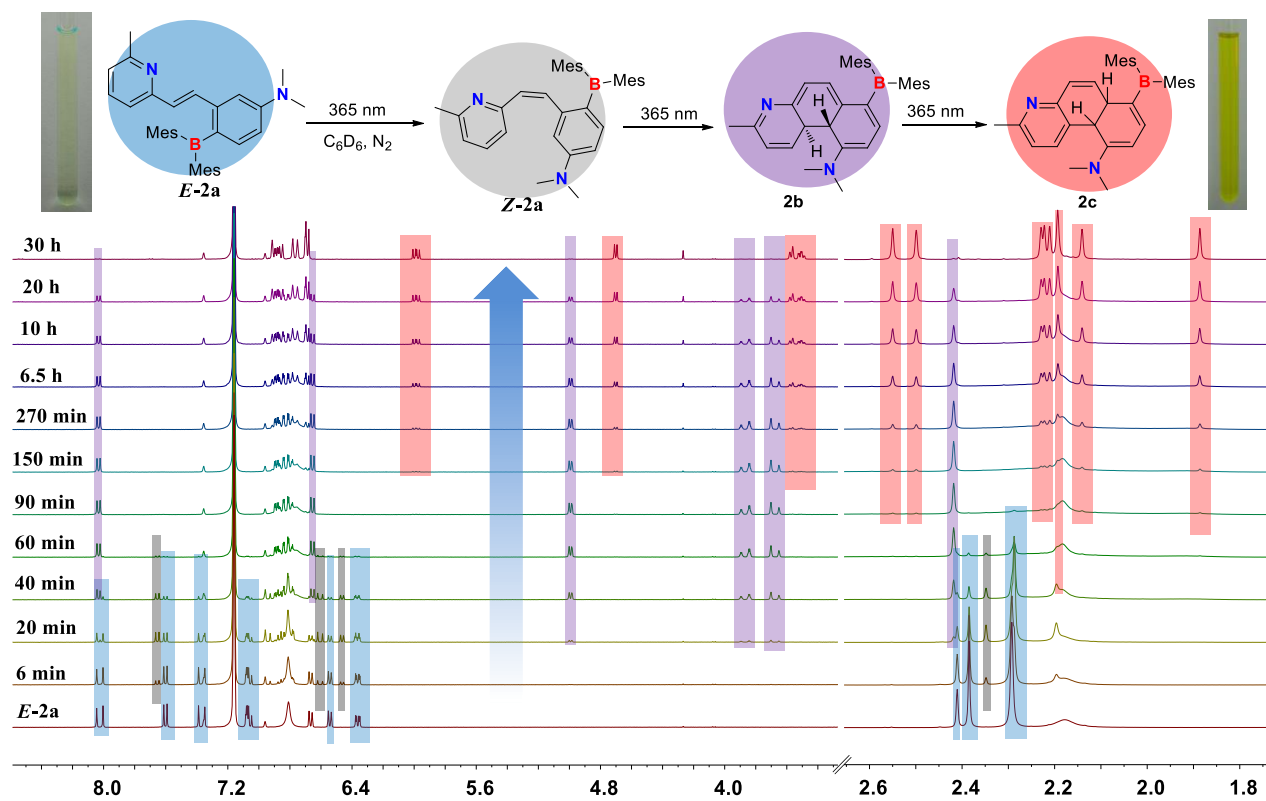

**Figure S5.**  $^1\text{H}$  NMR spectra showing the clean conversion of *E*-**2a** (blue highlight) to **2c** (red highlight) in  $\text{C}_6\text{D}_6$  under 365 nm irradiation ( $70^\circ\text{C}$ ).

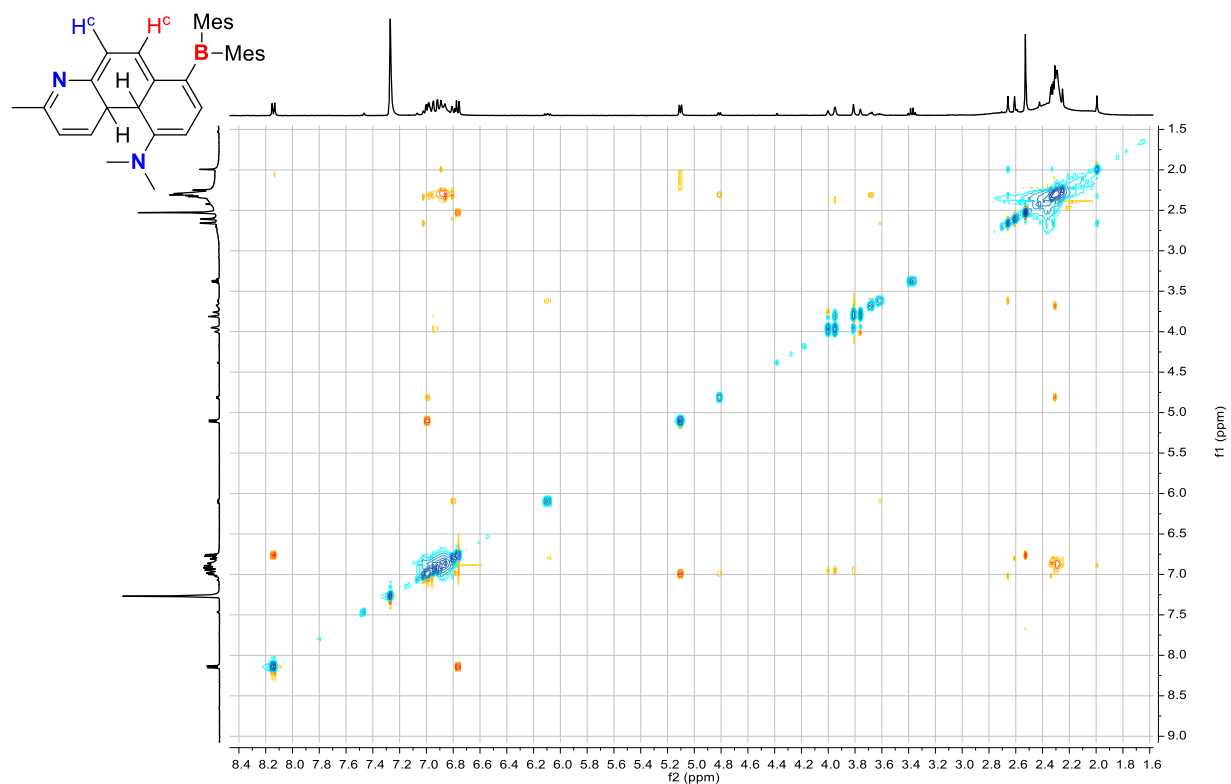

**Figure S6.** Full  $^1\text{H}$ - $^1\text{H}$  NOESY NMR spectrum of **2b** in  $\text{C}_6\text{D}_6$  (600 MHz).

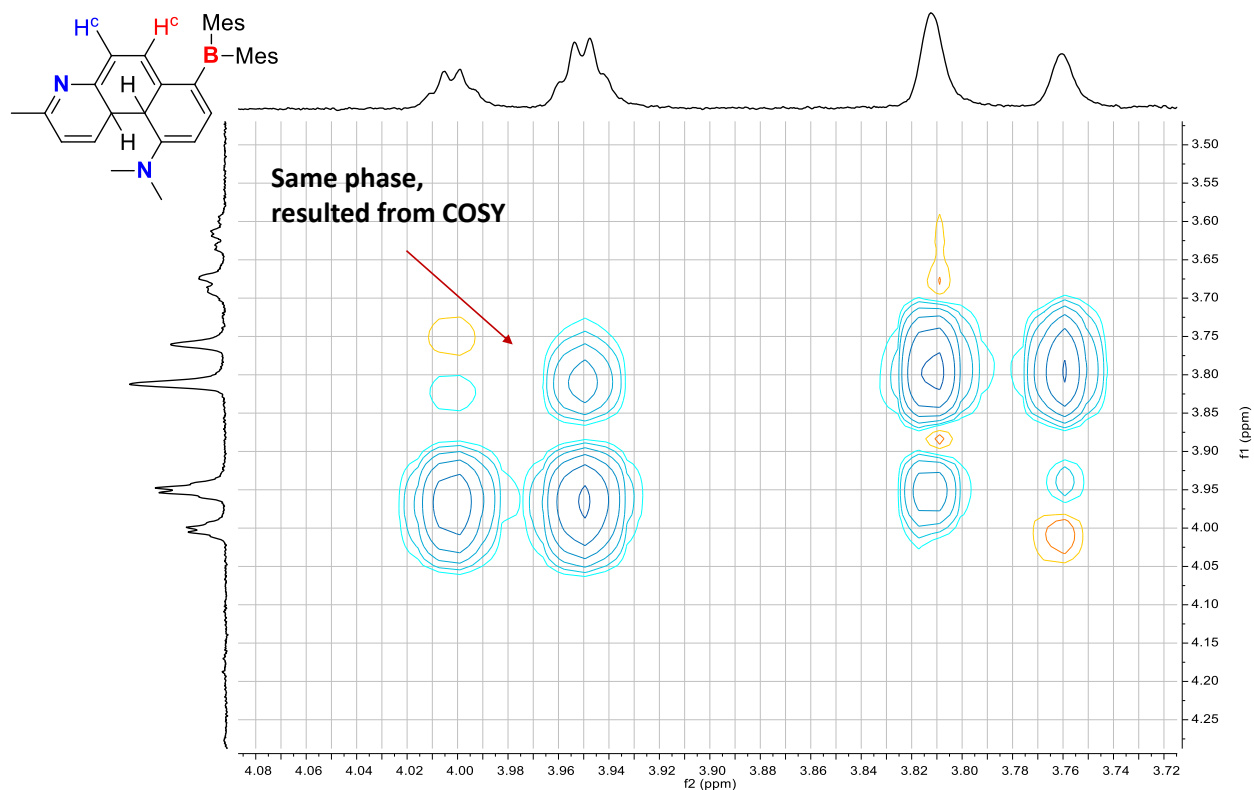

Figure S7. Partial  $^1\text{H}$ - $^1\text{H}$  NOESY NMR spectrum of **2b** in  $\text{C}_6\text{D}_6$  (600 MHz) establishing its *trans*-configuration.

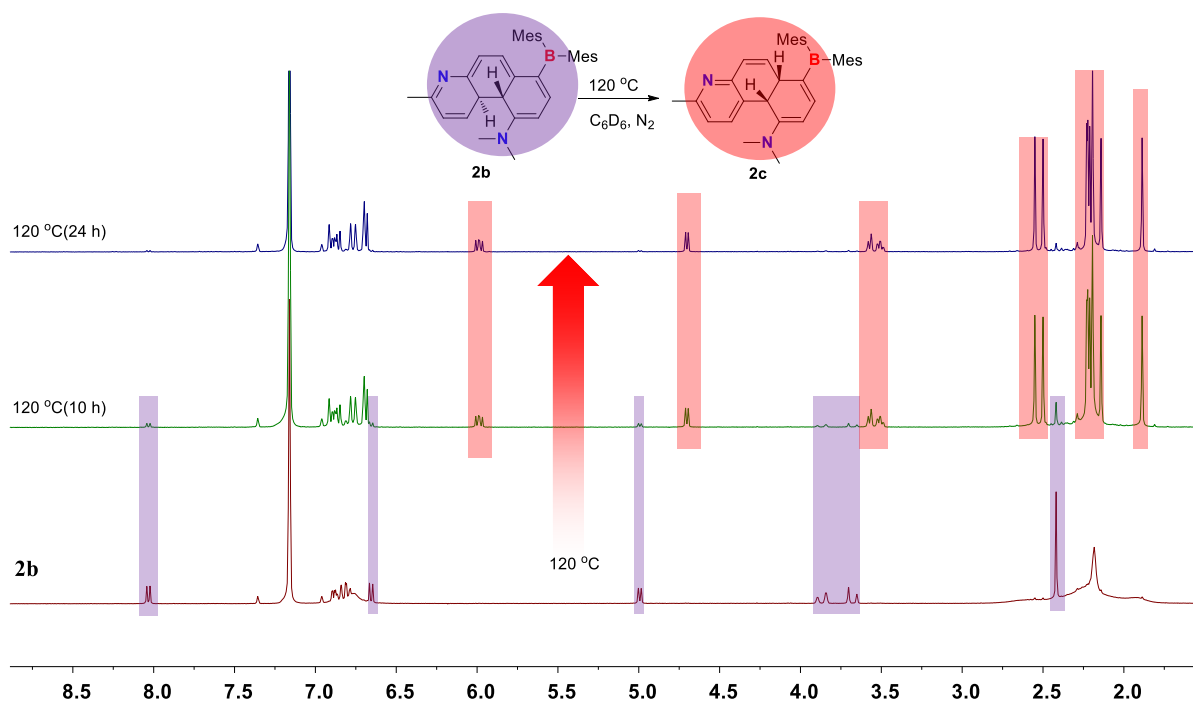

Figure S8.  $^1\text{H}$  NMR spectra showing the clean conversion of **2b** (blue highlight) to **2c** (top spectrum, red highlight) in  $\text{C}_6\text{D}_6$  ( $120\text{ }^\circ\text{C}$ ).



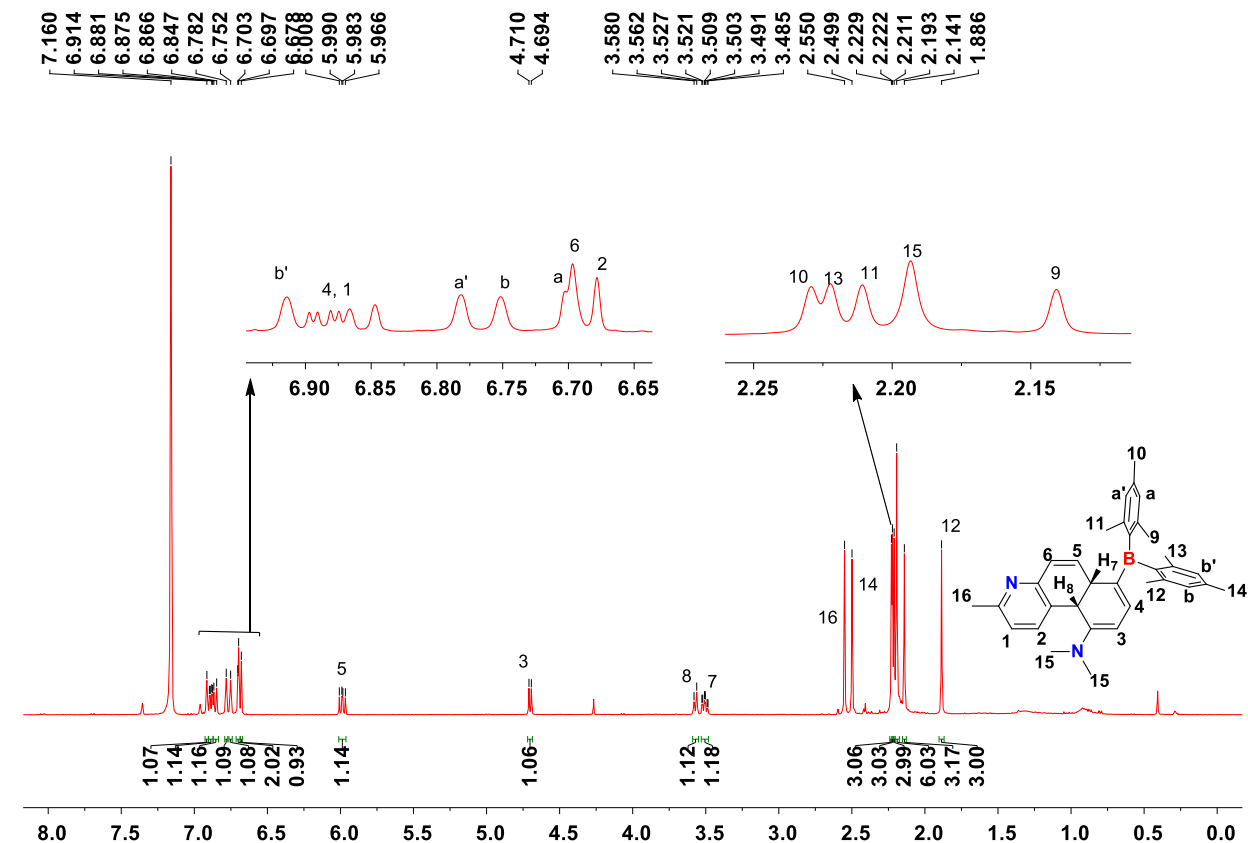

Figure S9.  $^1\text{H}$  NMR ( $\text{C}_6\text{D}_6$ , 400 MHz) spectra of compound **2c**.

### 2.3 NMR Photo/Thermal Isomerization Data of *E*-3a

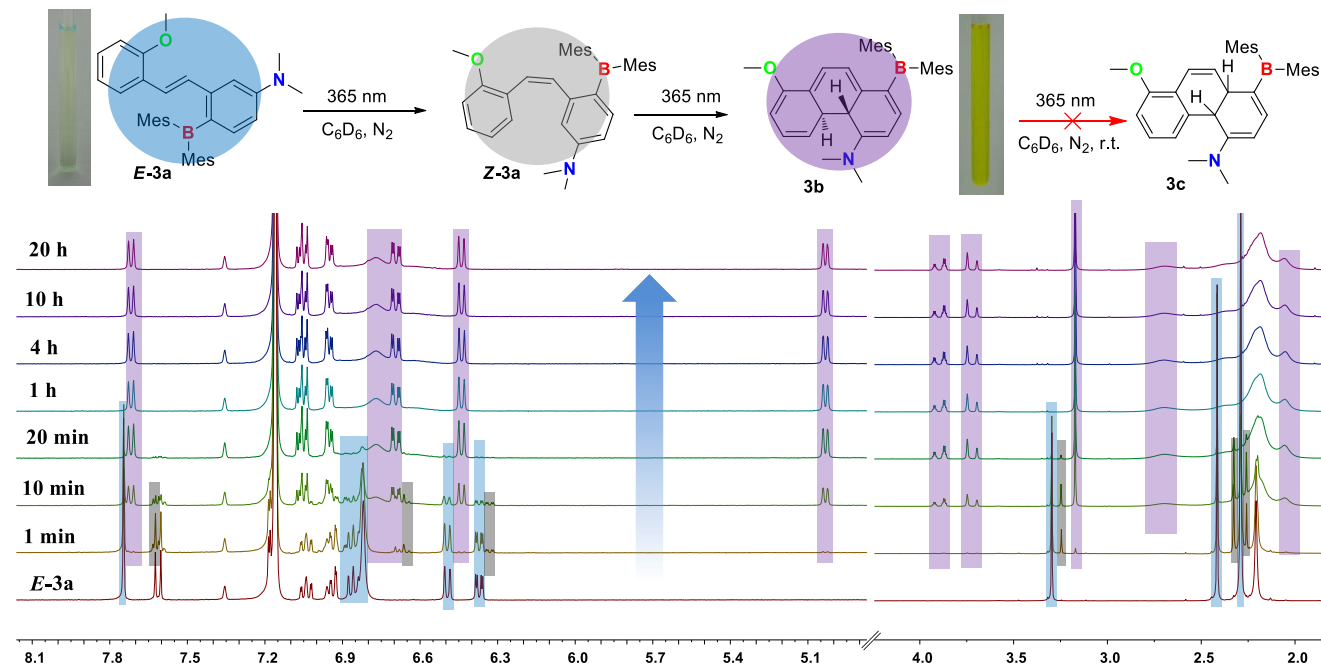

Figure S10.  $^1\text{H}$  NMR spectra showing the clean conversion of *E*-3a (blue highlight) to **3b** (purple highlight) in  $\text{C}_6\text{D}_6$  under 365 nm irradiation (room temperature).

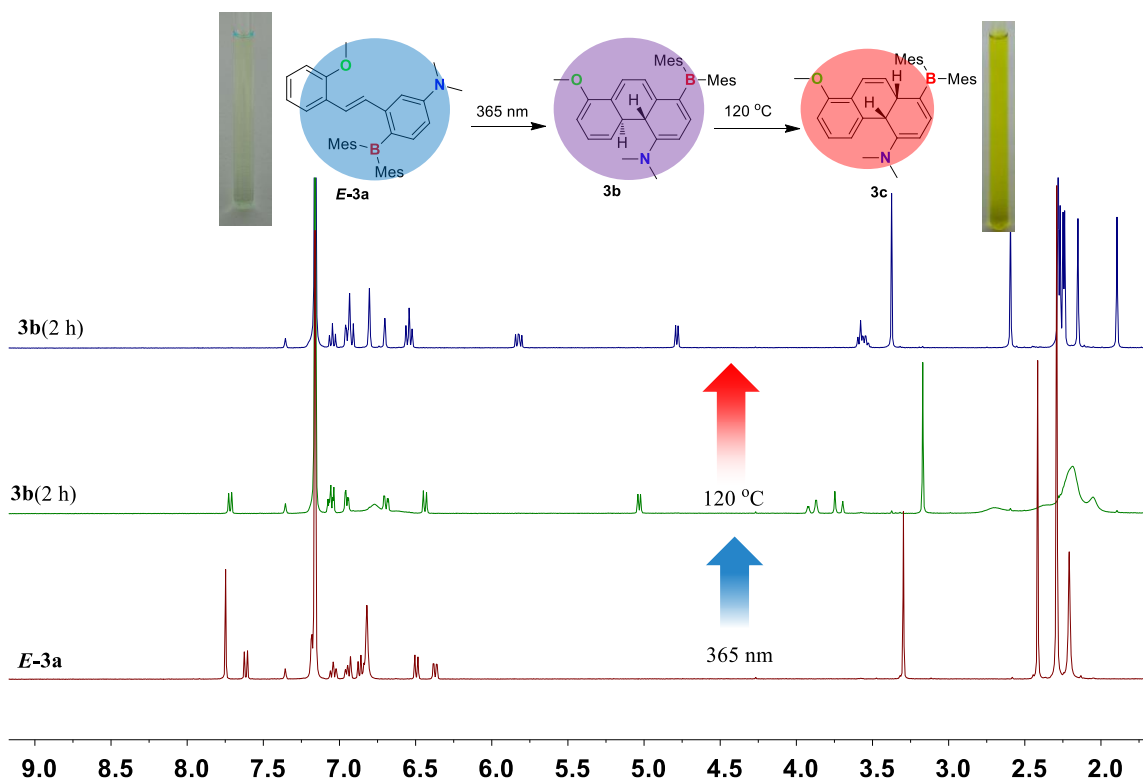

Figure S11.  $^1\text{H}$  NMR spectra showing the clean conversion of *E*-3b (purple highlight) to 3c (red highlight) in  $\text{C}_6\text{D}_6$  ( $120\text{ }^\circ\text{C}$ ).

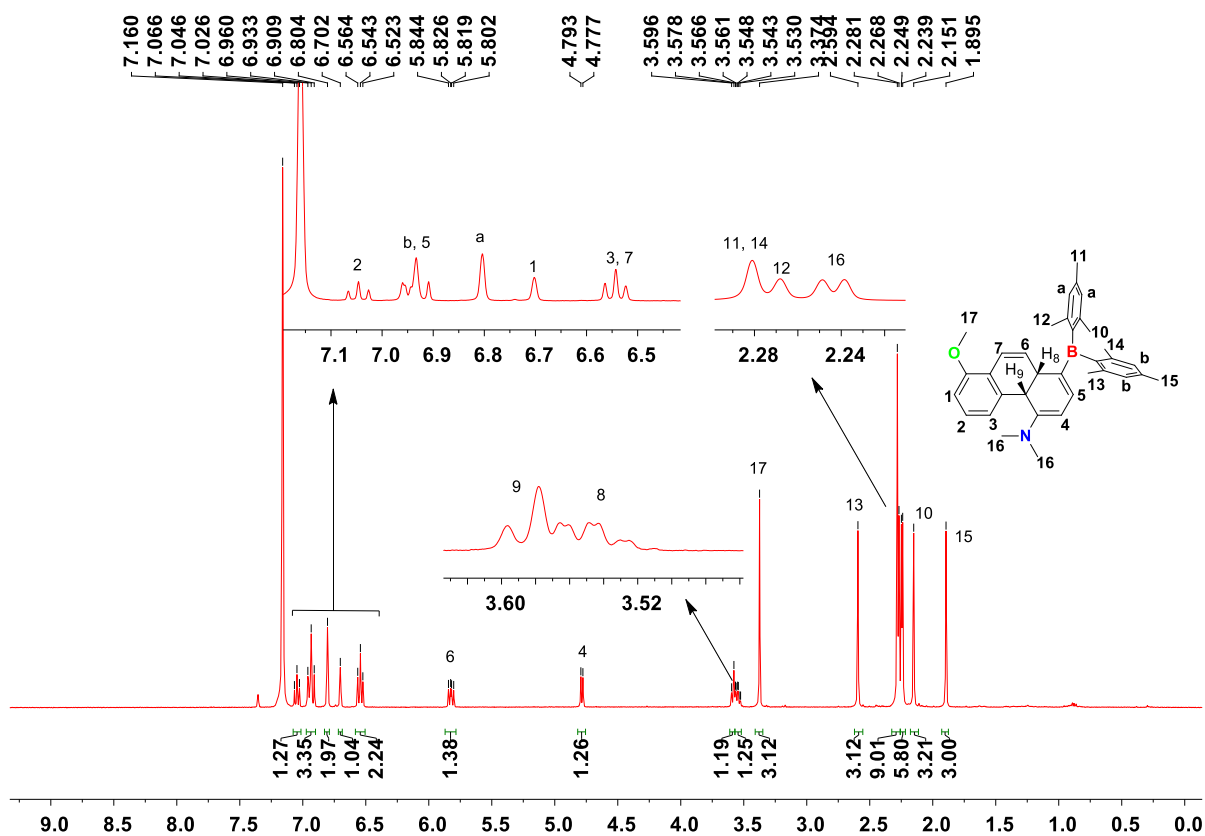

Figure S12.  $^1\text{H}$  NMR ( $\text{C}_6\text{D}_6$ , 400 MHz) spectra of compound 3c.

## 2.4 NMR Photo/Thermal Isomerization Data of *E*-4a

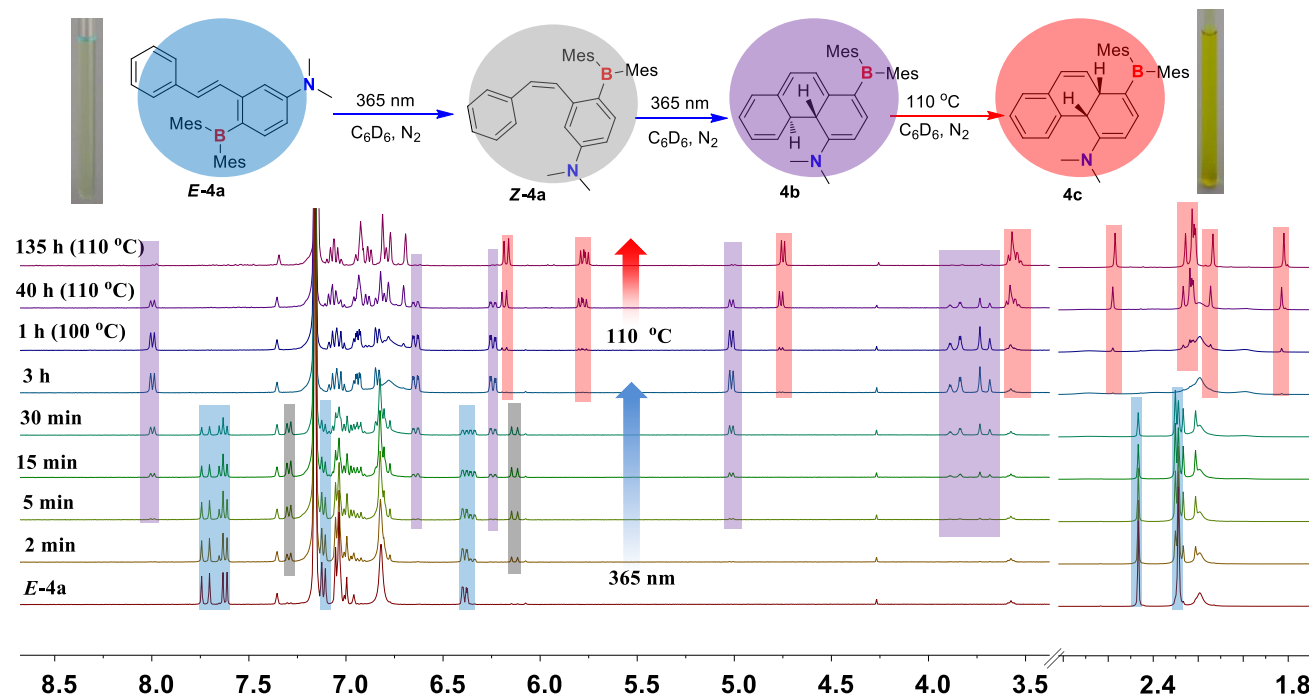

**Figure S13.**  $^1H$  NMR spectra showing the clean conversion of *E*-4a (blue highlight) to 4c (red highlight) in  $C_6D_6$  first under 365 nm irradiation, followed by heating at 110 °C.

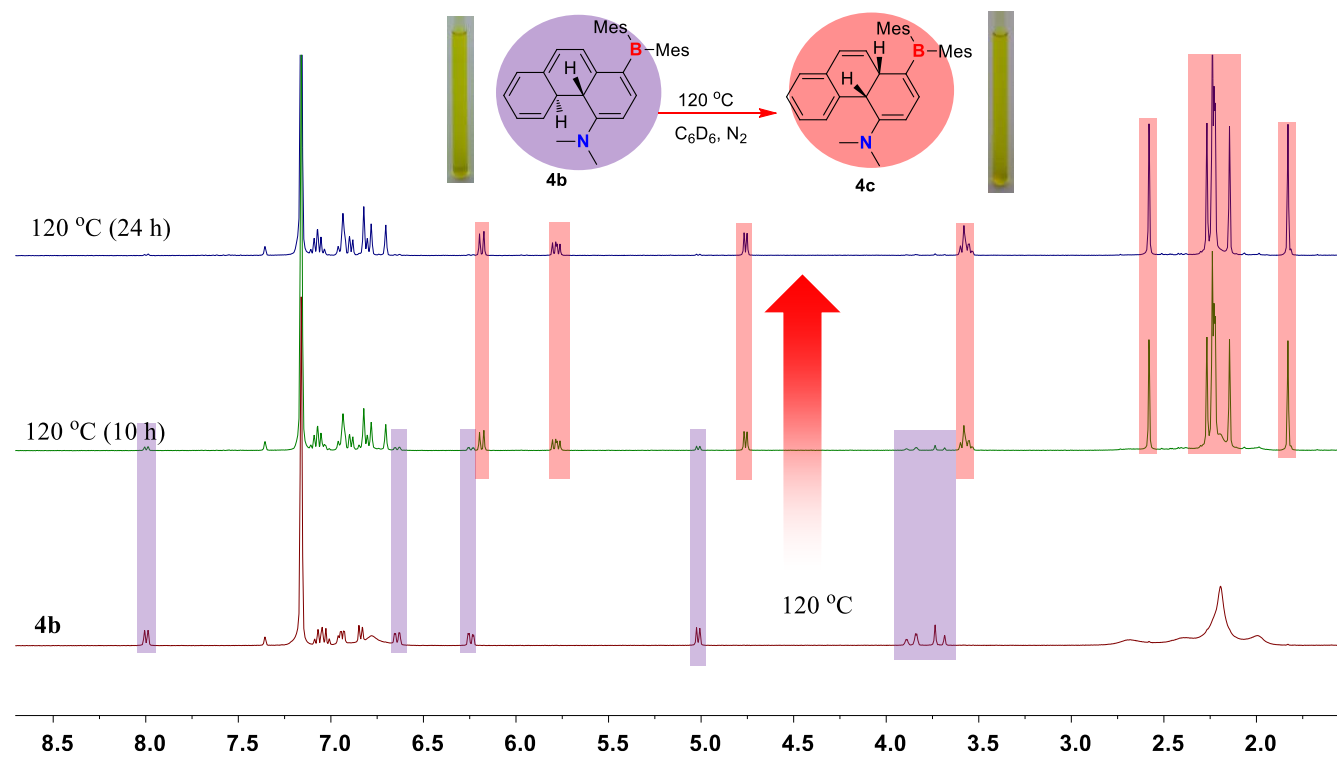

**Figure S14.**  $^1H$  NMR spectra showing the clean conversion of 4b (1 mg, 0.6 mL  $C_6D_6$ , bottom spectrum, blue highlight) to 4c (top spectrum, red highlight) in  $C_6D_6$  (120 °C).

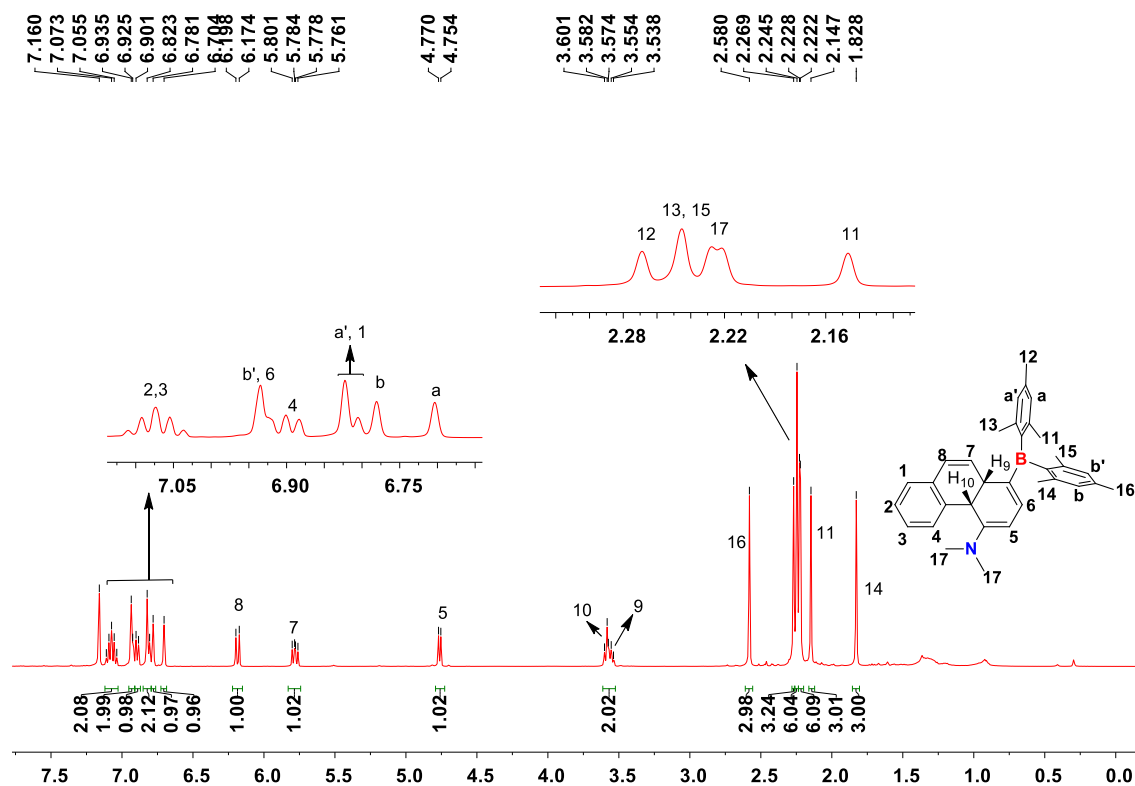

Figure S15.  $^1\text{H}$  NMR ( $\text{C}_6\text{D}_6$ , 400 MHz) spectra of compound **4c**.

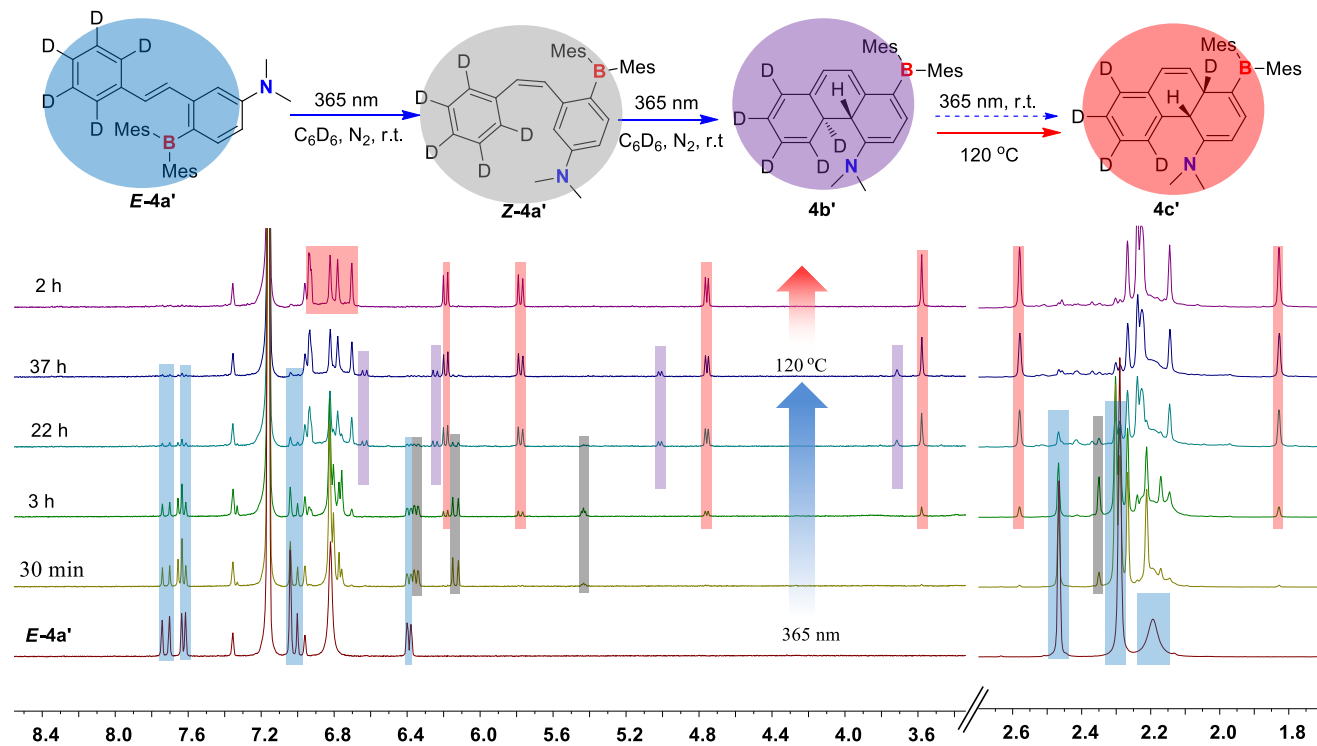

Figure S16.  $^1\text{H}$  NMR spectra showing the clean conversion of **E-4a'** (blue highlight) to **4c'** (red highlight) in  $\text{C}_6\text{D}_6$  first under 365 nm irradiation, followed by heating at 110 °C.

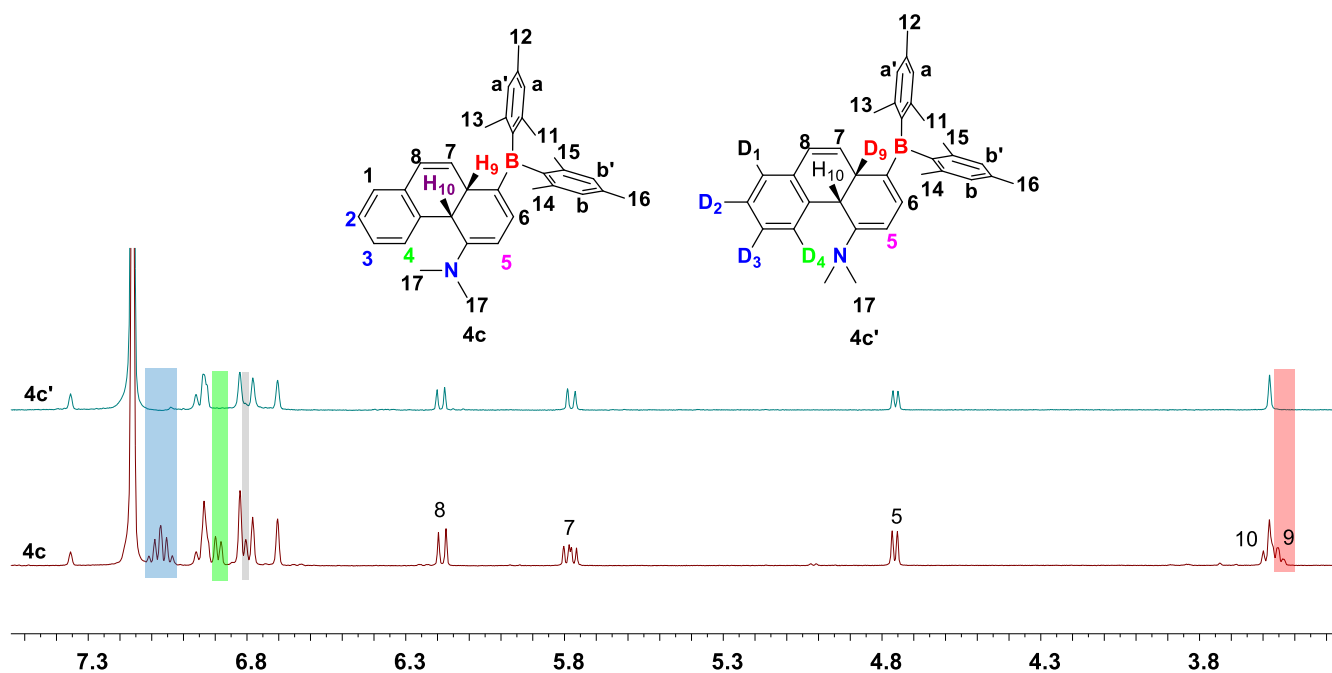

**Figure S17.** Stacked <sup>1</sup>H-NMR spectra comparing **4c** (bottom) and **4c'** (top) with the deuterated protons highlighted.

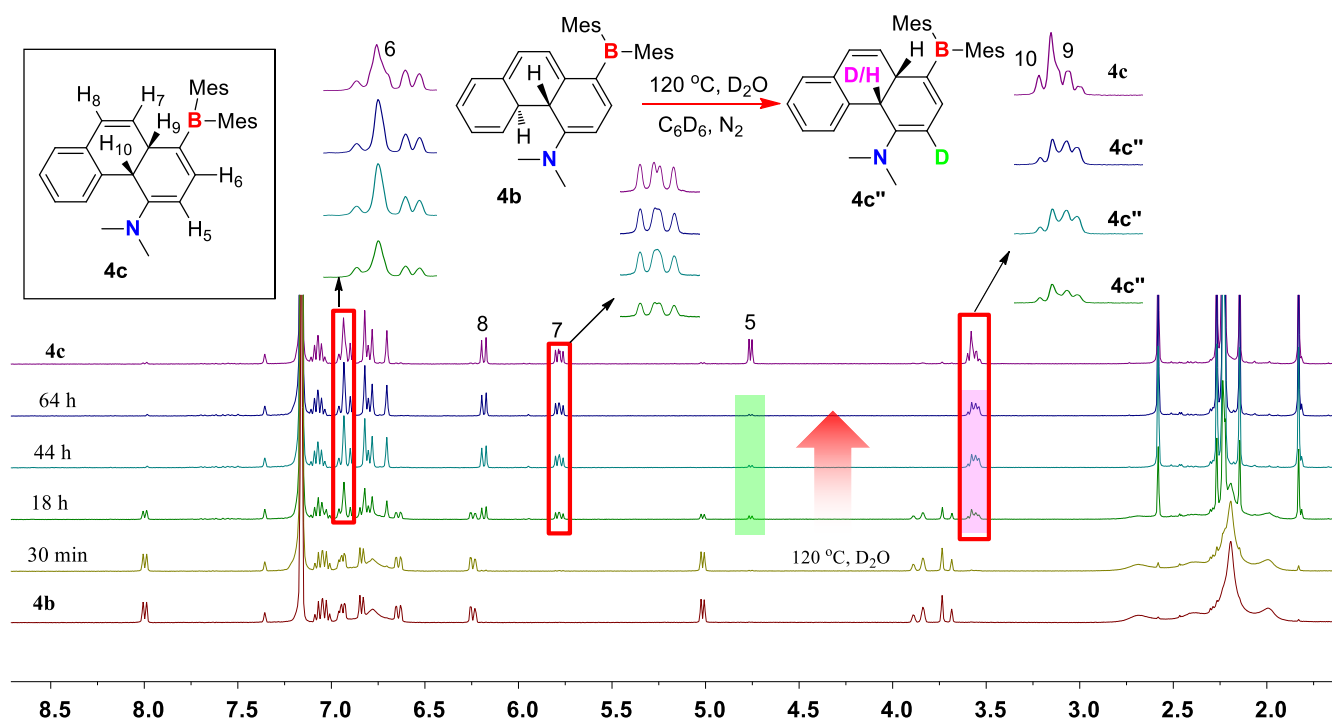

**Figure S18.** <sup>1</sup>H NMR spectra showing the clean conversion of **4b** to **4c''** with heating at 120 °C in the presence of D<sub>2</sub>O. The top spectrum shows pure **4c**.

## 2.5 NMR Photo/Thermal Isomerization Data of *E*-5a

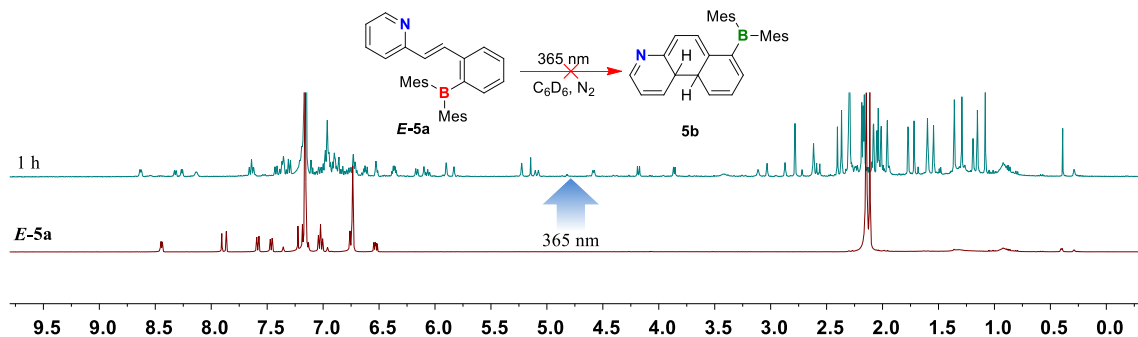

Figure S19. <sup>1</sup>H NMR spectra of *E*-5a in C<sub>6</sub>D<sub>6</sub> (1 mg, 0.6 mL) under 365 nm irradiation.

## 2.6 NMR Photo/Thermal Isomerization Data of *E*-6a

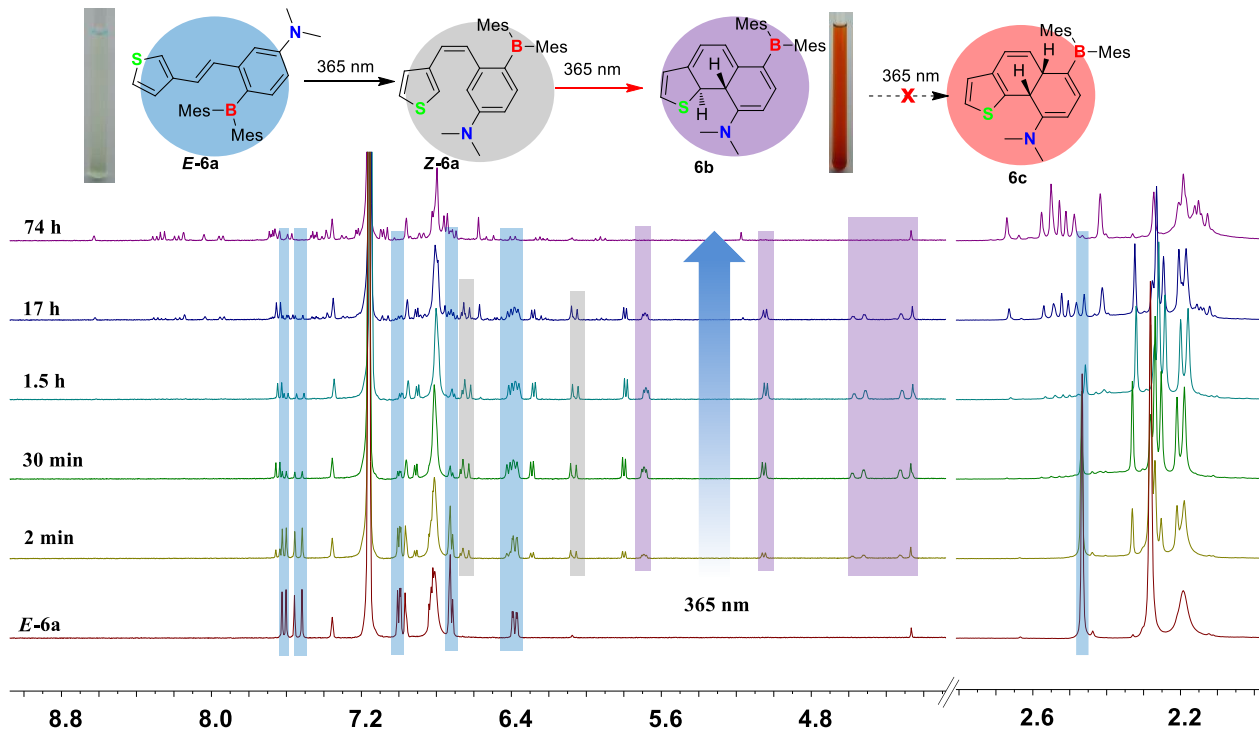

Figure S20. <sup>1</sup>H NMR spectra showing the clean conversion of *E*-6a (blue highlight) to 6b (purple highlight) in C<sub>6</sub>D<sub>6</sub> under 365 nm irradiation.

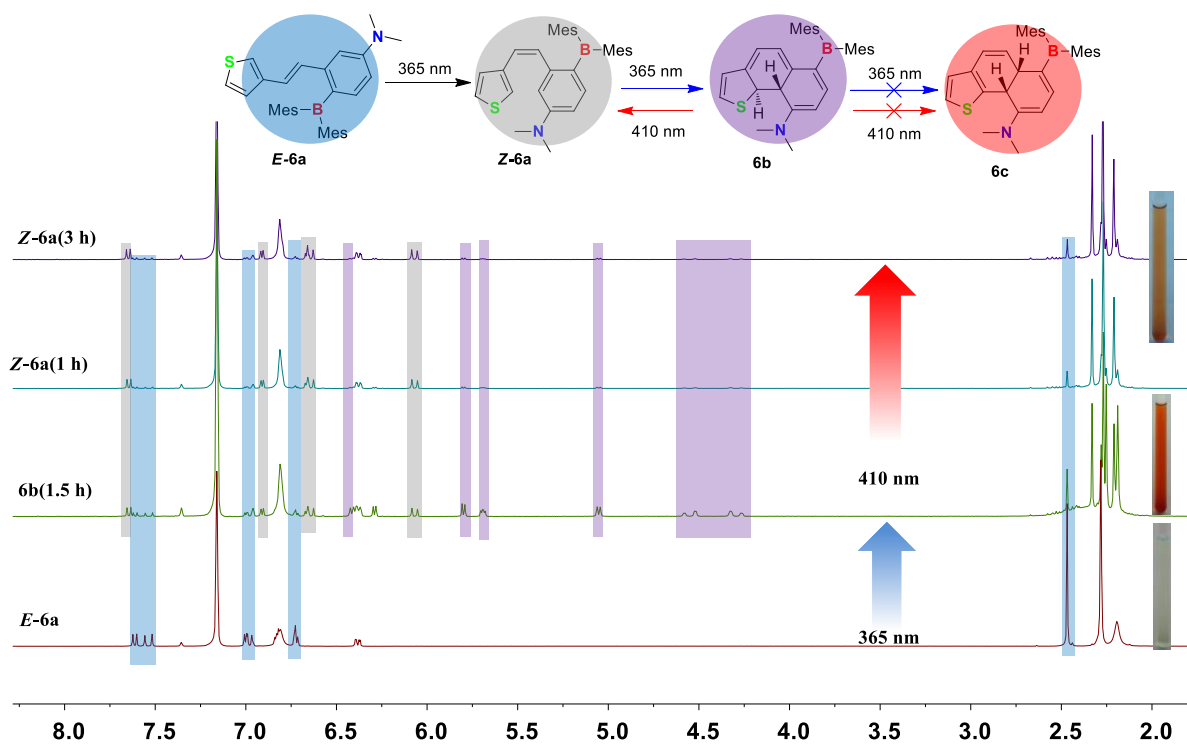

Figure S21. Time-lapsed  $^1\text{H}$  NMR spectra of *E*-6a in  $\text{C}_6\text{D}_6$ .

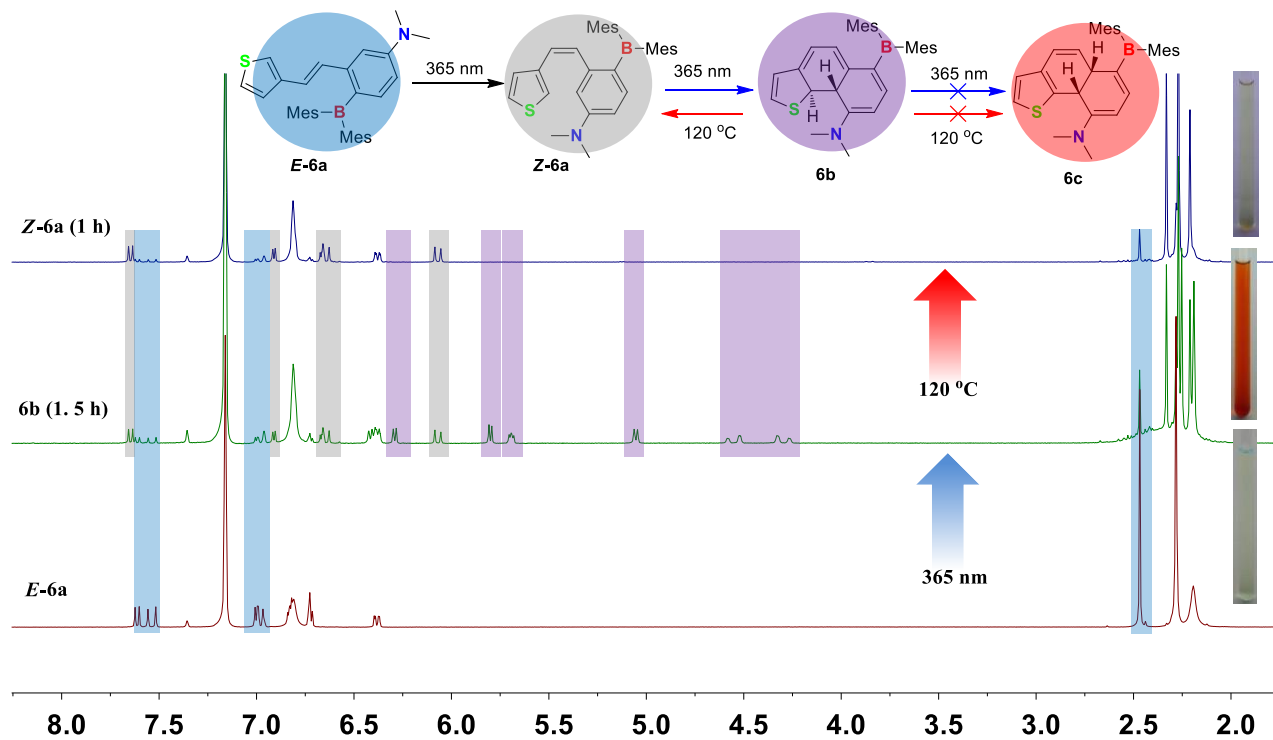

Figure S22. Time-lapsed  $^1\text{H}$  NMR spectra of *E*-6a in  $\text{C}_6\text{D}_6$ .

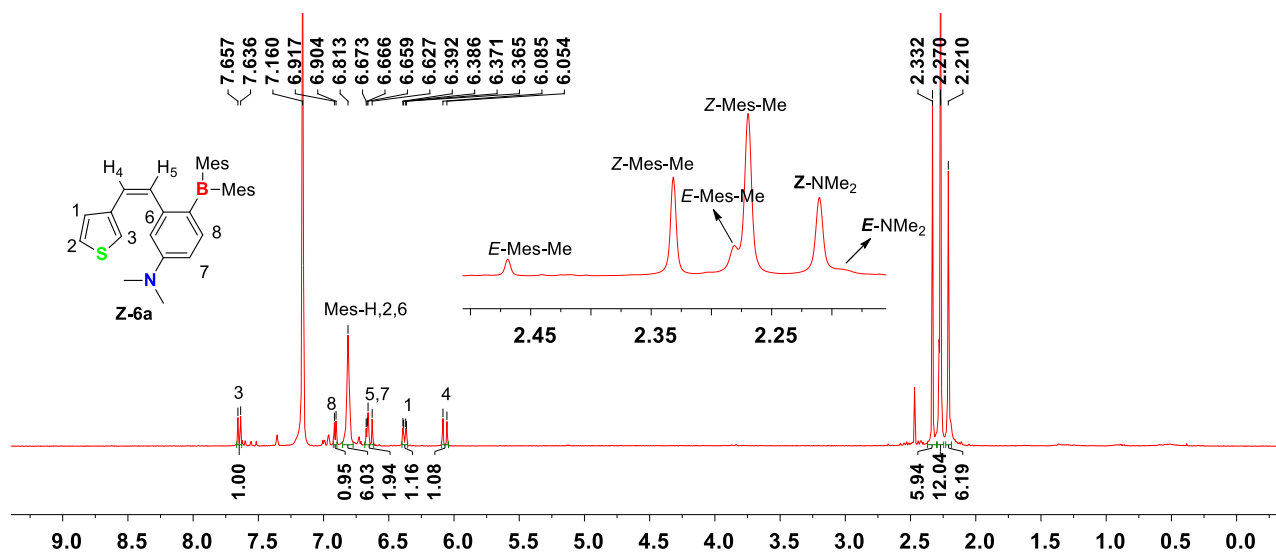

Figure S23. <sup>1</sup>H NMR spectrum of **Z-6a** in C<sub>6</sub>D<sub>6</sub>.

## 2.7 NMR Photo/Thermal Isomerization Data of **E-7a**

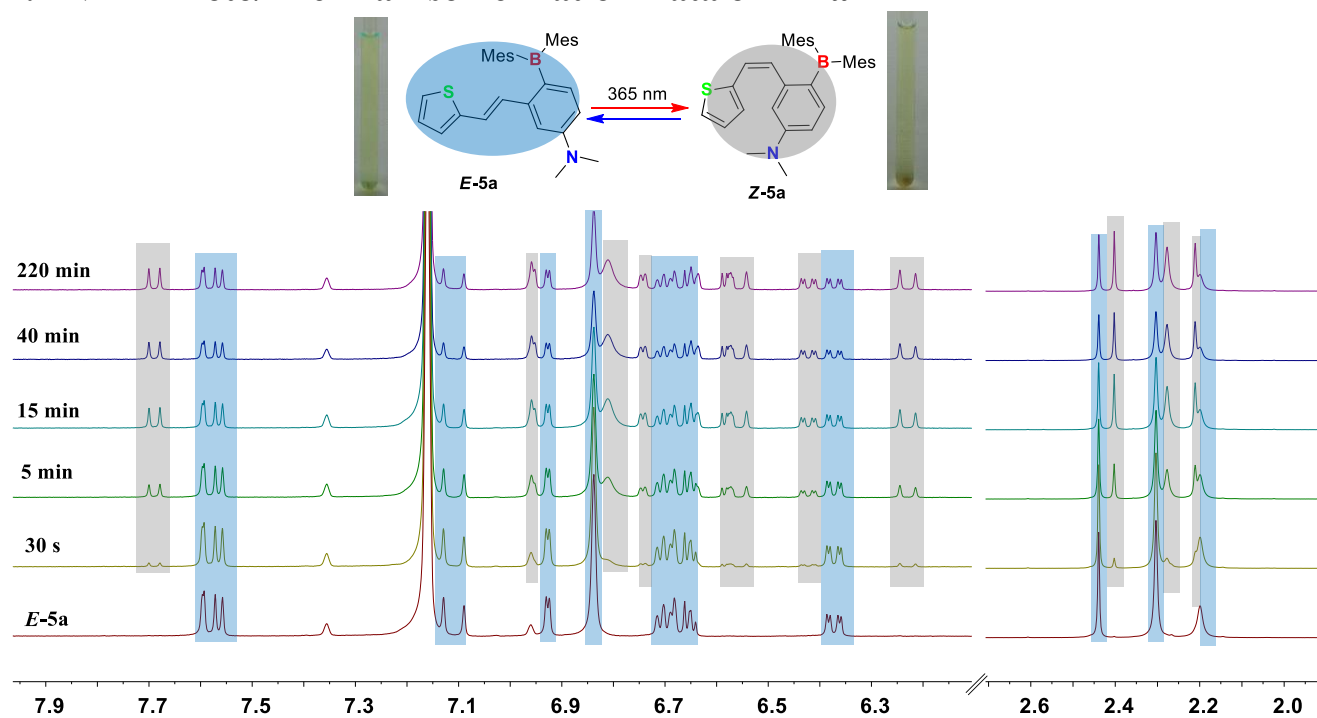

Figure S24. <sup>1</sup>H NMR spectra showing the conversion of **E-7a** (blue highlight) to **Z-7a** (purple highlight) in C<sub>6</sub>D<sub>6</sub> under 365 nm irradiation.



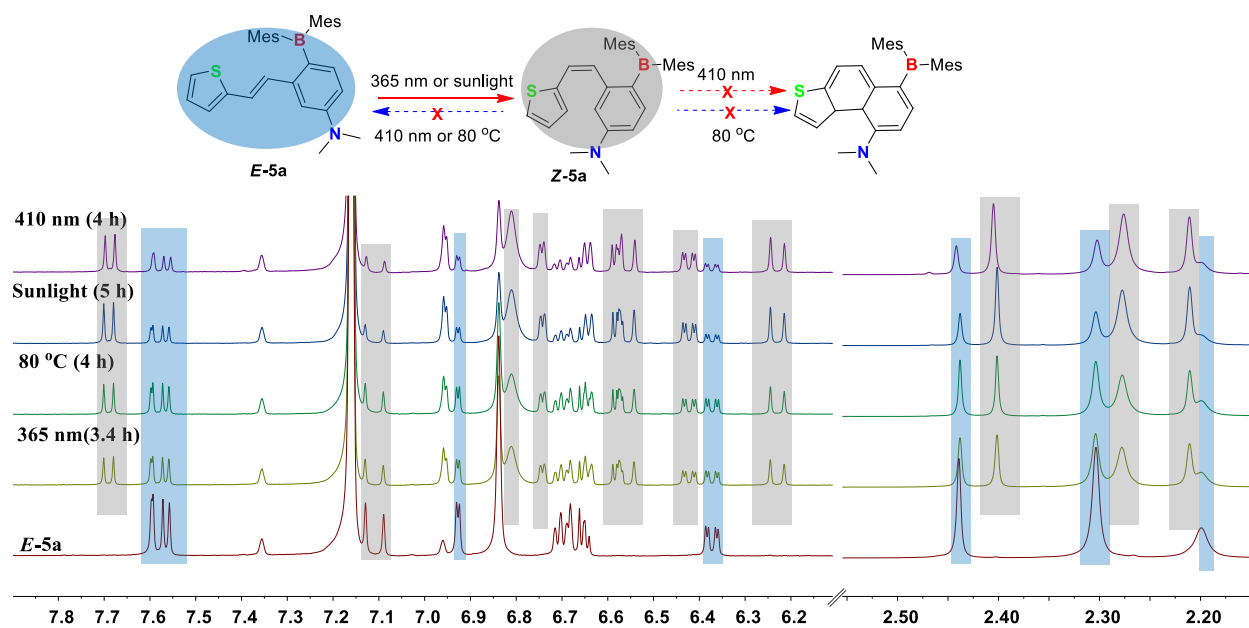

Figure S25. Time-lapsed <sup>1</sup>H NMR spectra from *E*-7a to *Z*-7a in C<sub>6</sub>D<sub>6</sub>, r.t. or 80 °C.

## 2.8 NMR Photo/Thermal Isomerization Data of *E*-8a

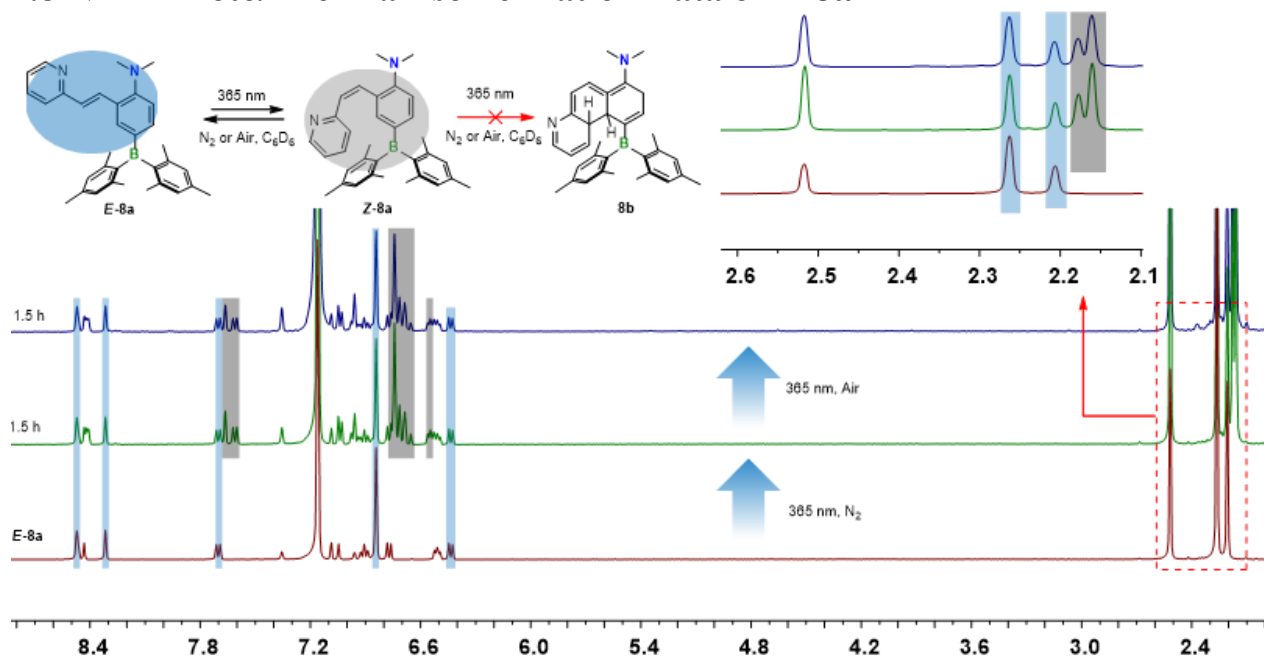

Figure S26. <sup>1</sup>H NMR spectra showing the conversion of *E*-8a (blue highlight) to *Z*-8a (black highlight) in C<sub>6</sub>D<sub>6</sub> under 365 nm irradiation.

## 2.9 NMR Photo/Thermal Isomerization Data of *E-9a*

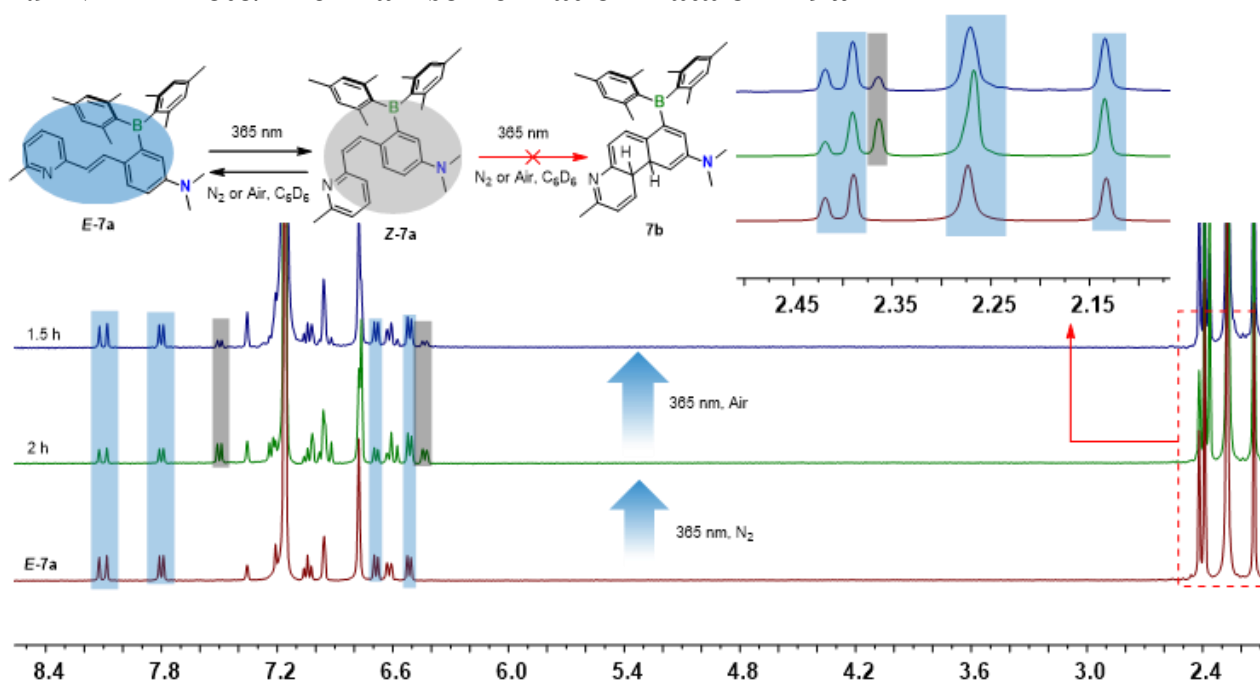

**Figure S27.** <sup>1</sup>H NMR spectra showing the conversion of *E-9a* (blue highlight) to *Z-9a* (black highlight) in C<sub>6</sub>D<sub>6</sub> under 365 nm irradiation.

## S3: Stability of **1b** – **4b** Under Ambient Conditions

### General procedure:

Following conversion (according to the procedure outlined previously) to their cyclized products in J-Young NMR tubes, **1b** – **4b** were exposed to air by means of removing their Teflon caps. The samples were then monitored by NMR for the allotted time listed.

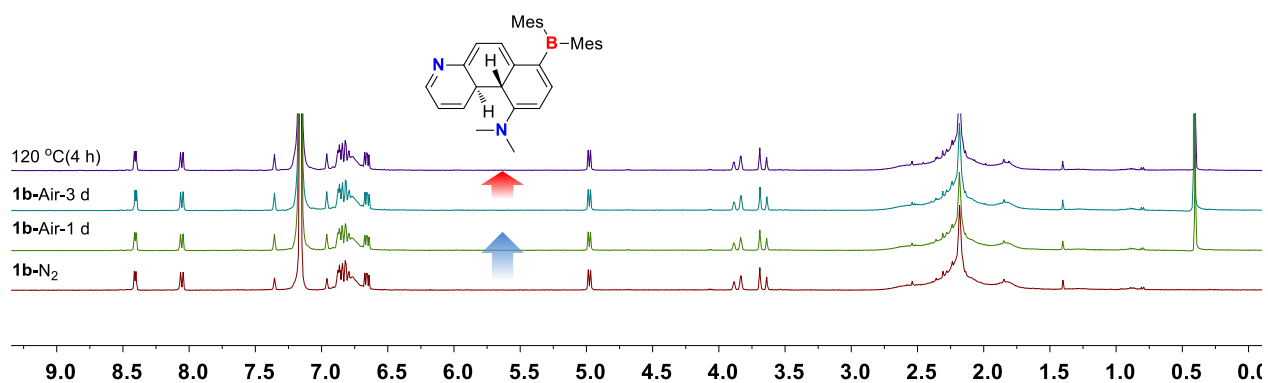

**Figure S28.** <sup>1</sup>H NMR tracking of compound **1b** upon exposure to the air.

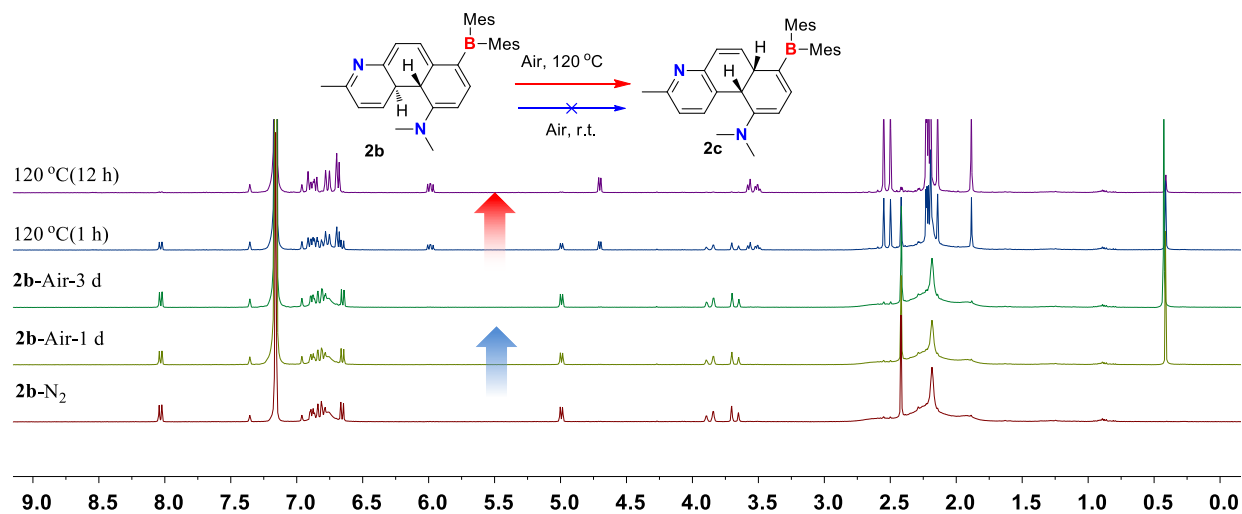

Figure S29.  $^1\text{H}$  NMR tracking of compound **2b** under exposed to the air.

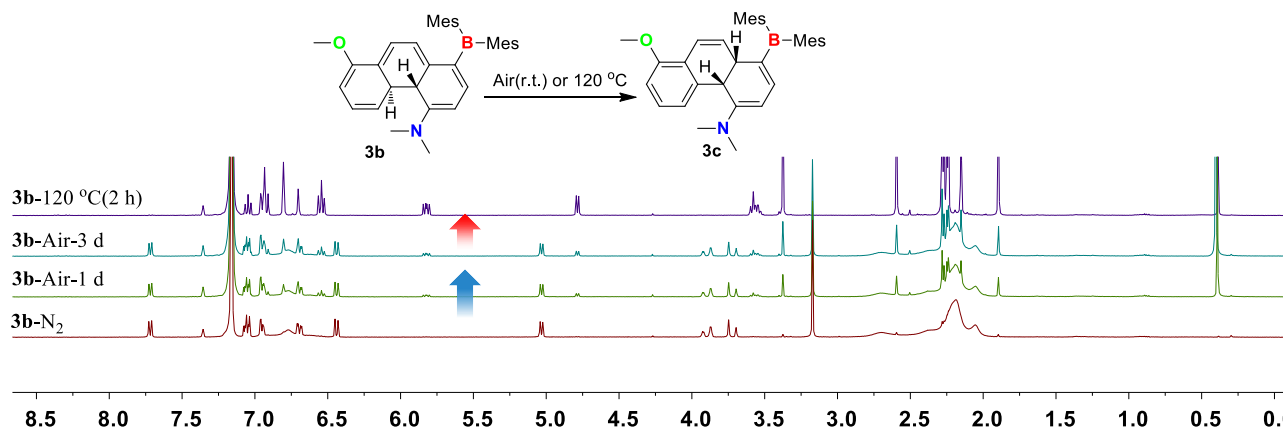

Figure S30.  $^1\text{H}$  NMR tracking of compound **3b** under exposed to the air.

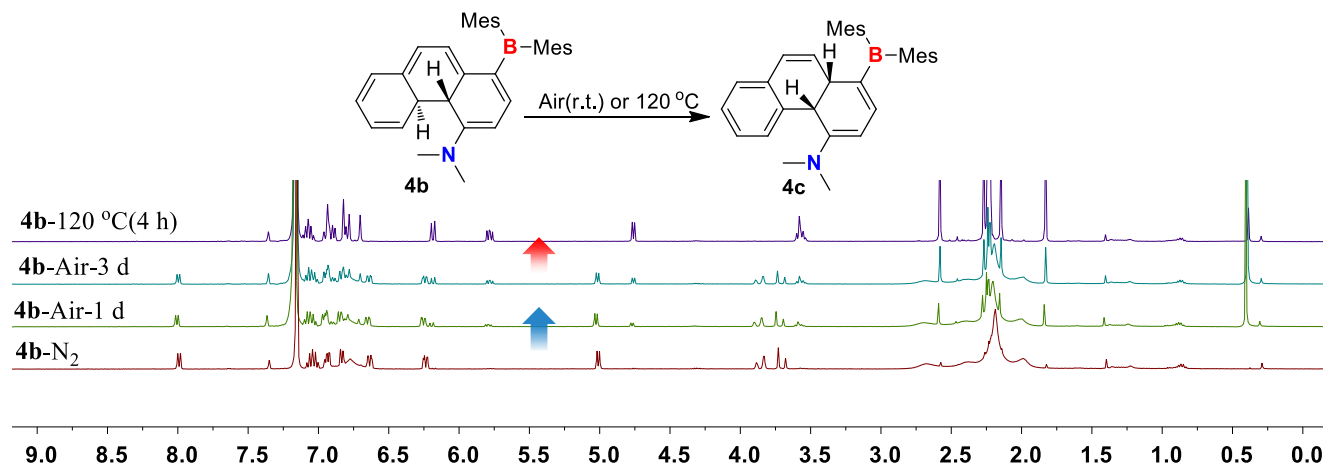

Figure S31.  $^1\text{H}$  NMR tracking of compound **4b** under exposed to the air.

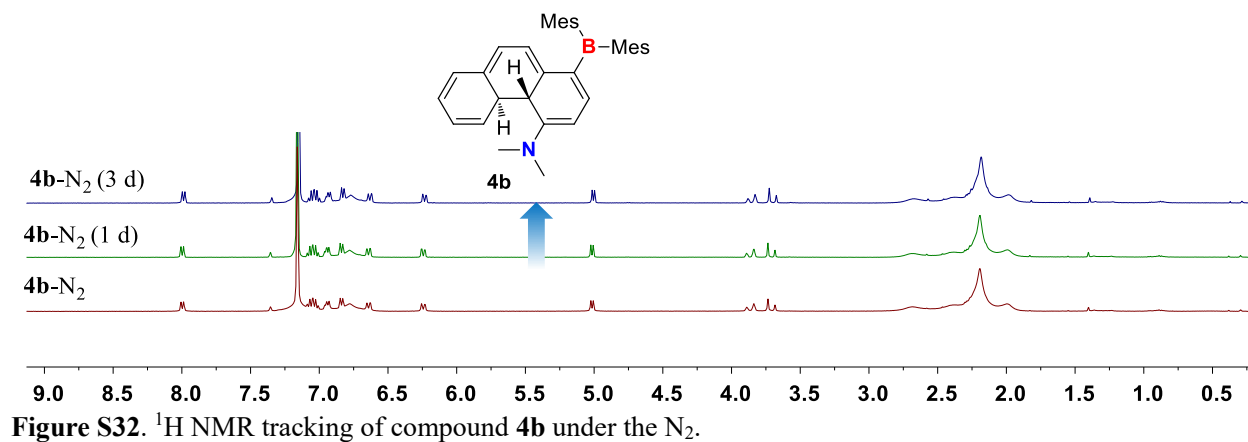

### S4: Stability of **1c** – **4c** Under Ambient Conditions

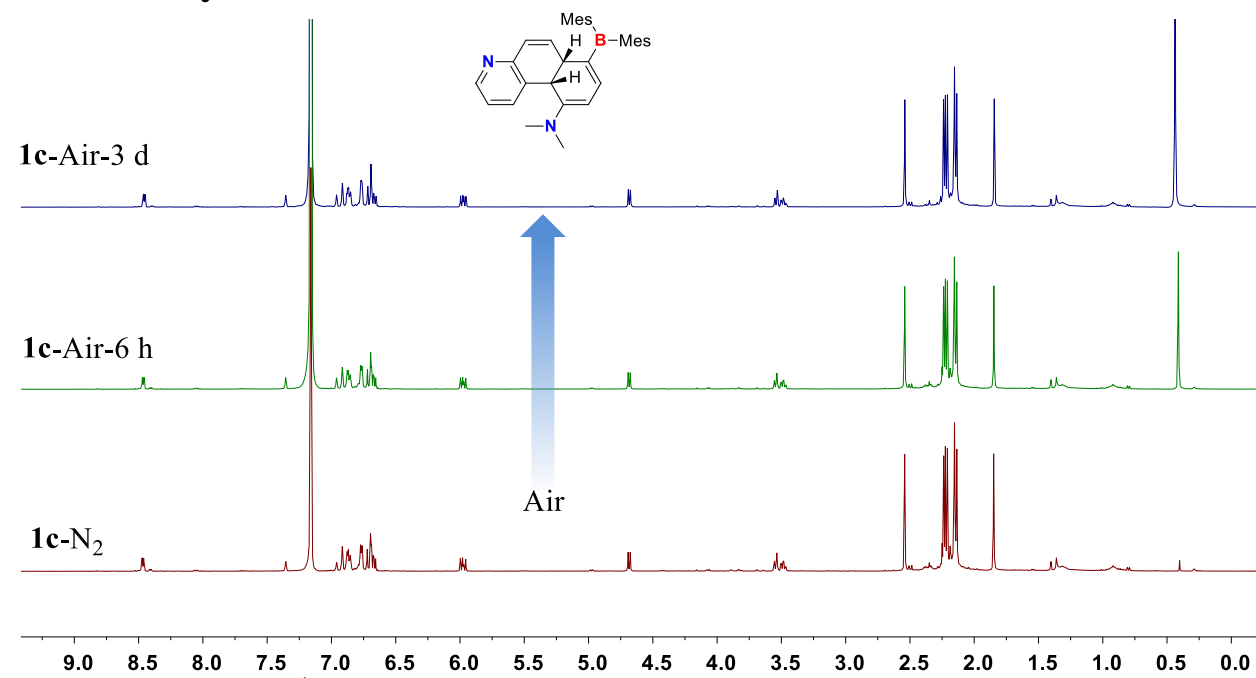

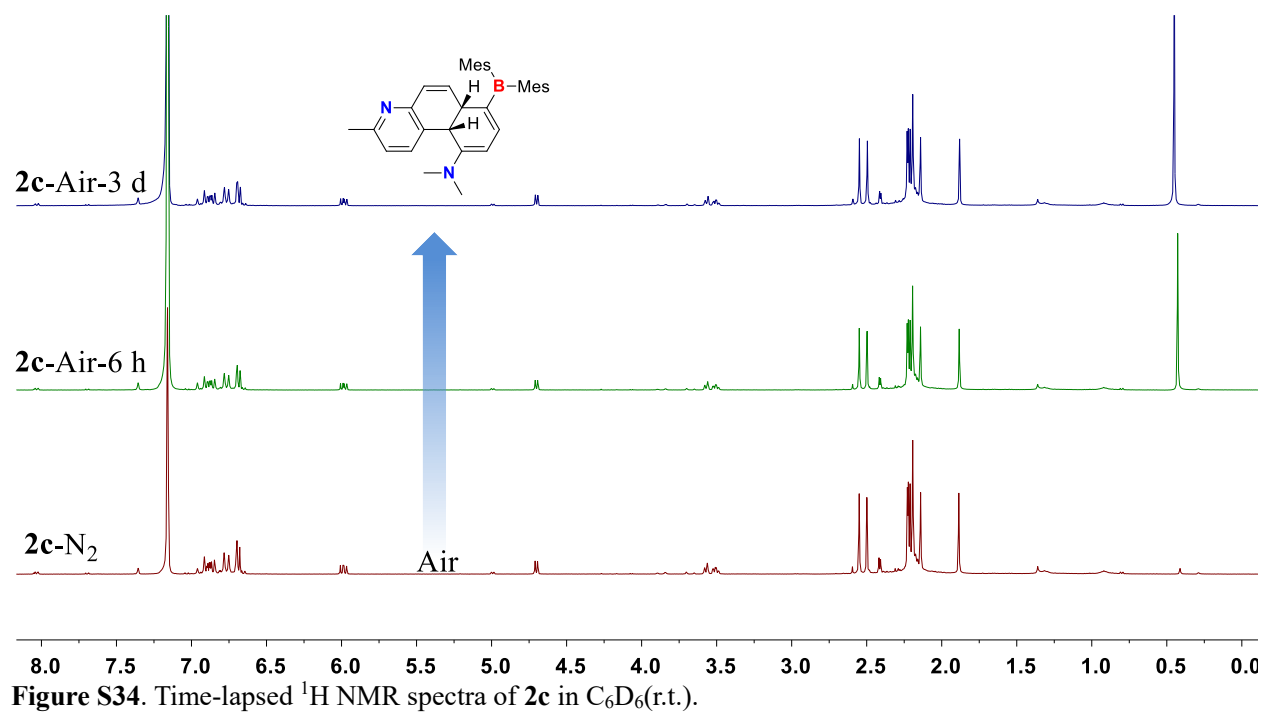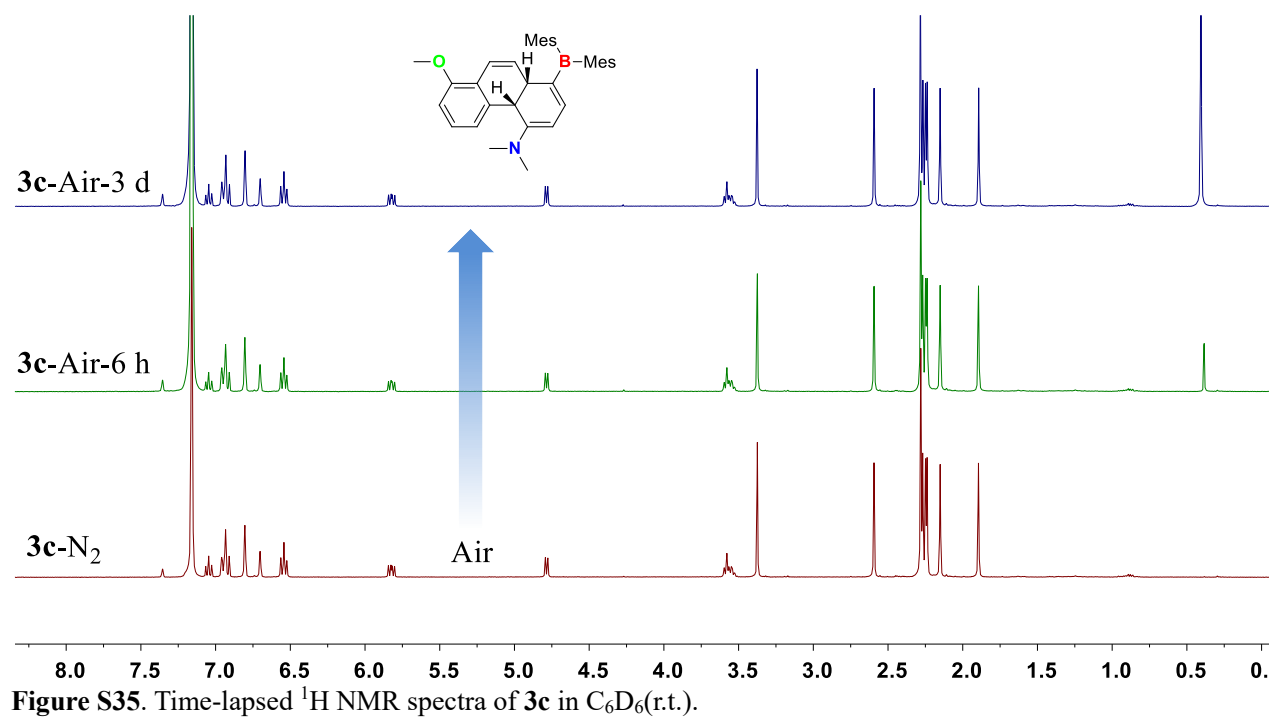

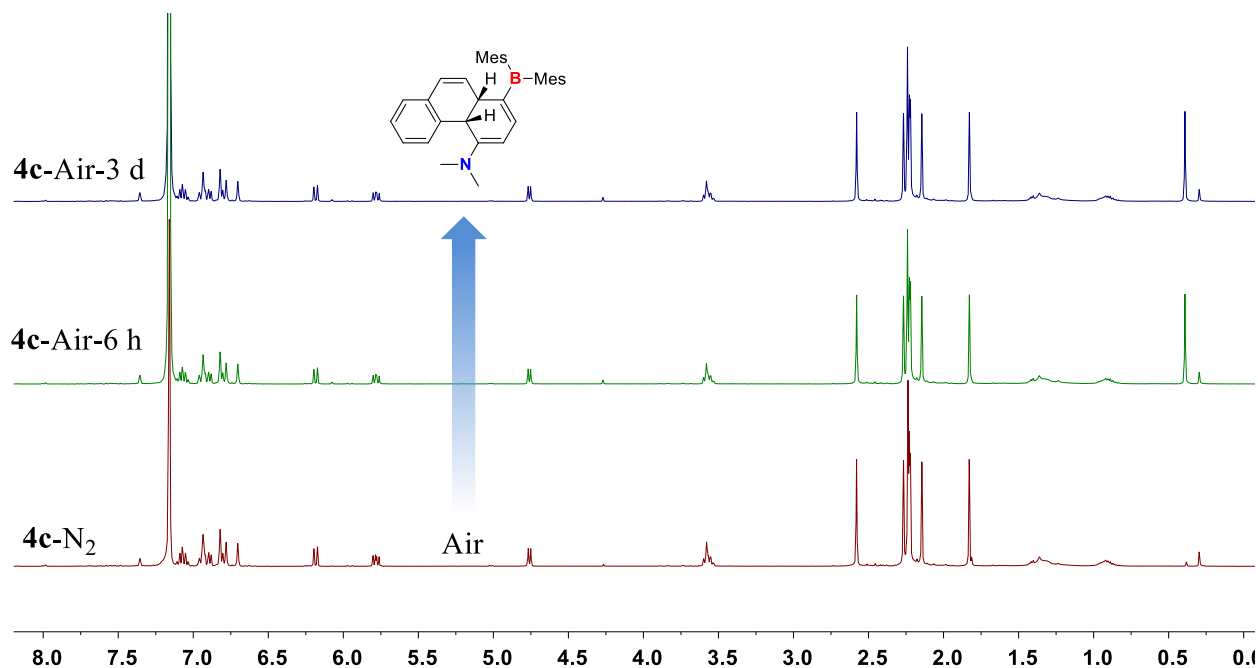

Figure S36. Time-lapsed  $^1\text{H}$  NMR spectra of **4c** in  $\text{C}_6\text{D}_6$  (r.t.).

## S5: UV-Vis/Fluorescence Photoisomerization Data of *E*-1a–*E*-9a, 1d–4d, 6d

### General procedure:

In a  $\text{N}_2$  filled glovebox, compounds *E*-1a – *E*-9a were added to quartz cuvettes to achieve concentrations of  $1 \times 10^{-5}$  M in THF (2.8 mL), after which the completed samples were tightly sealed with their teflon caps and removed from the glovebox. Photoisomerization experiments were performed in a 360 nm Uv lamp (room temperature) and monitored periodically by UV-vis and fluorescence spectrometer until no additional spectral change was observed.

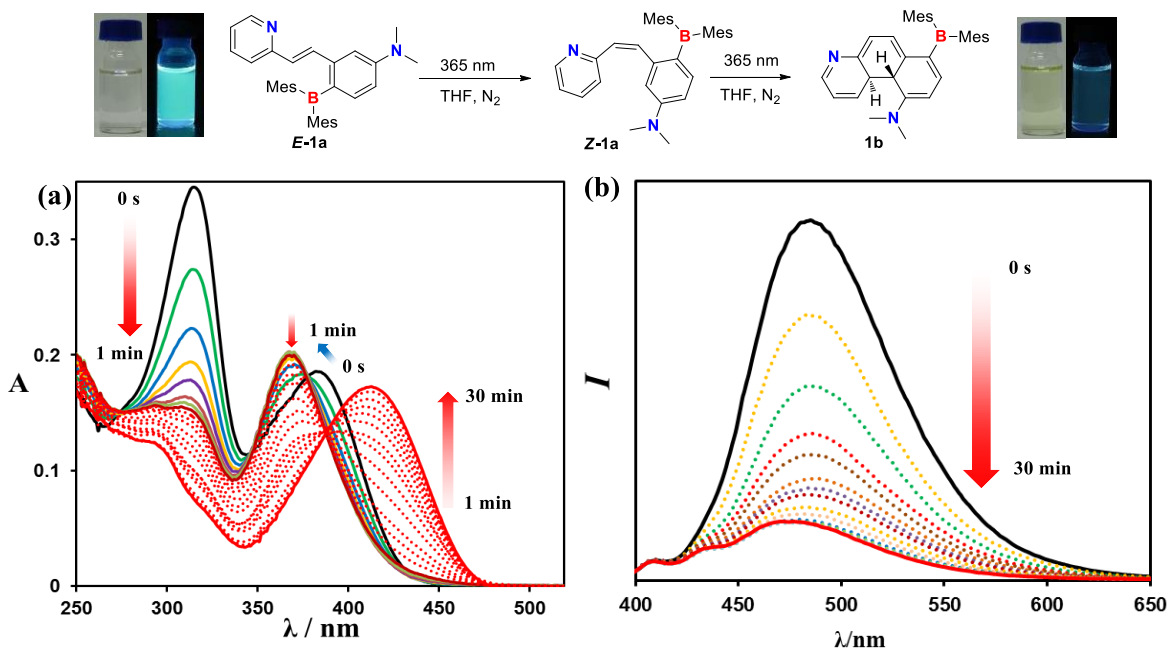

**Figure S37.** Absorption (a) and emission (b) spectra of *E*-1a→*Z*-1a→1b in THF ( $1 \times 10^{-5}$  M) under 365 nm irradiation. Excitation wavelength was 382 nm.

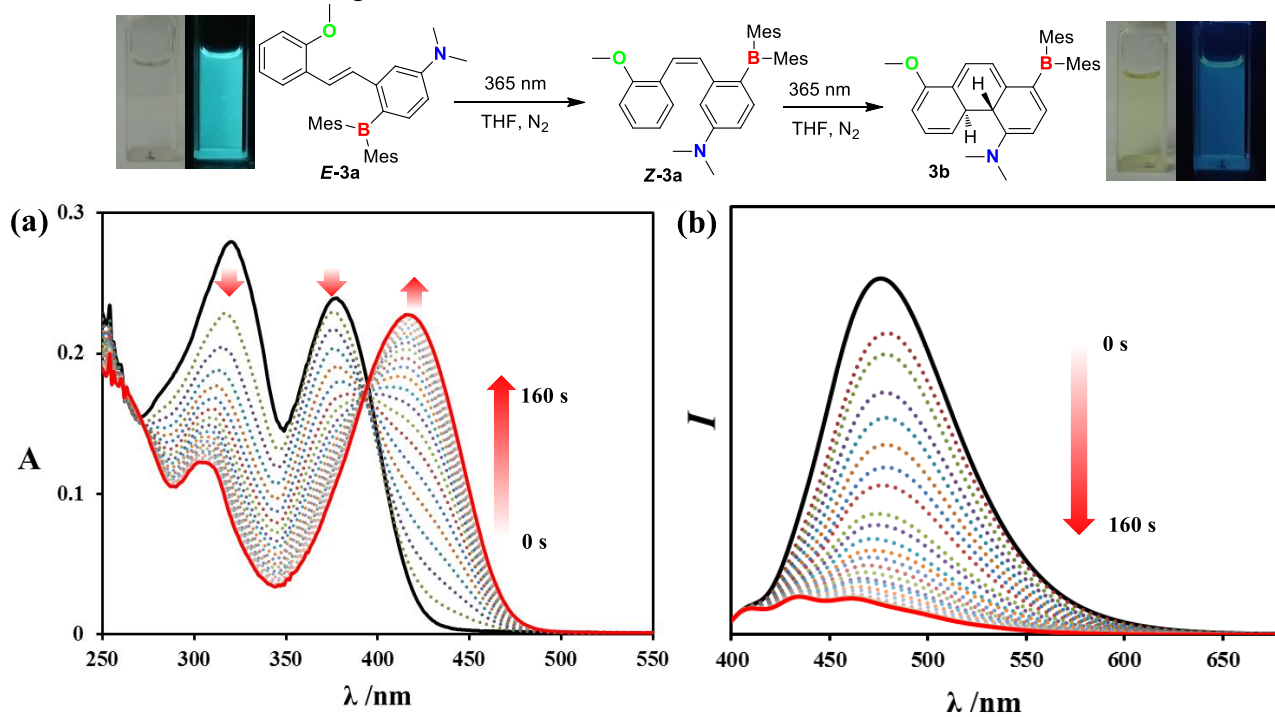

**Figure S38.** Absorption (a) and emission (b) spectra of *E*-3a→*Z*-3a→3b in THF ( $1 \times 10^{-5}$  M) under 365 nm irradiation. Excitation wavelength was 379 nm.

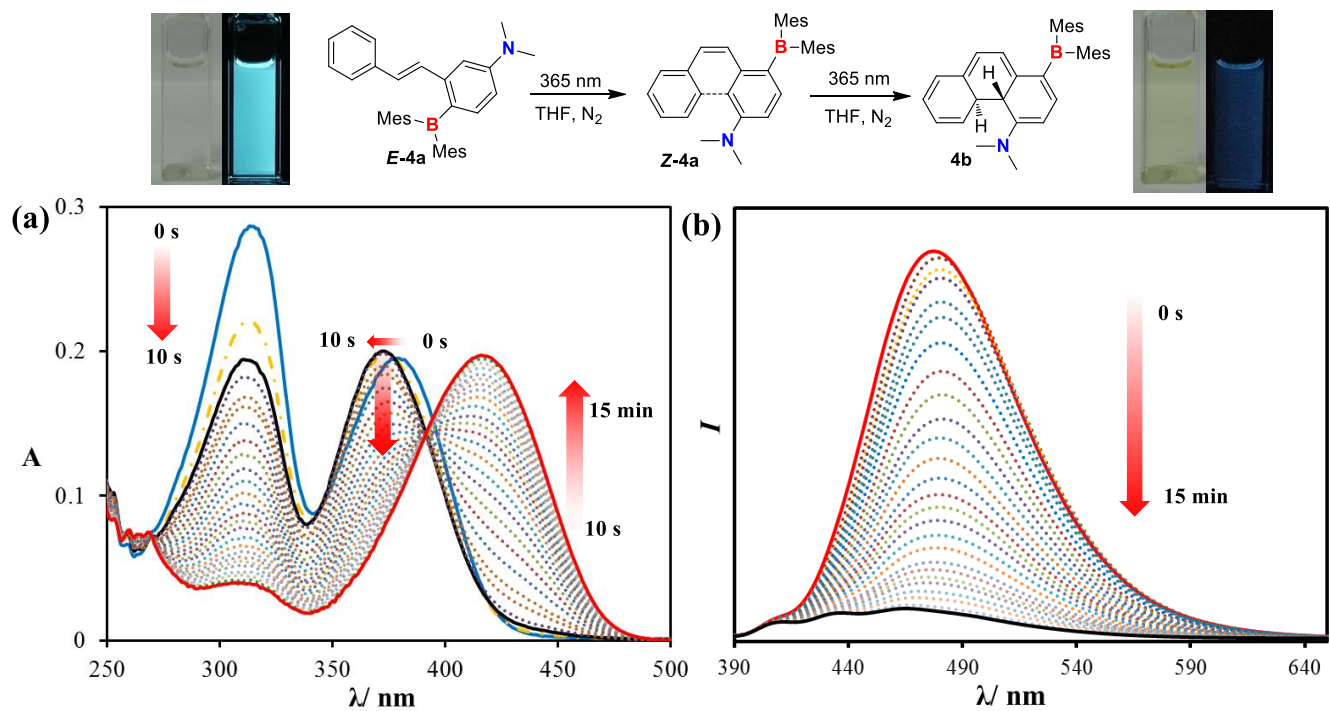

**Figure S39.** Absorption (a) and emission (b) spectra of *E*-4a→*Z*-4a→4b in THF ( $1 \times 10^{-5}$  M) under 365 nm irradiation. Excitation wavelength was 382 nm.

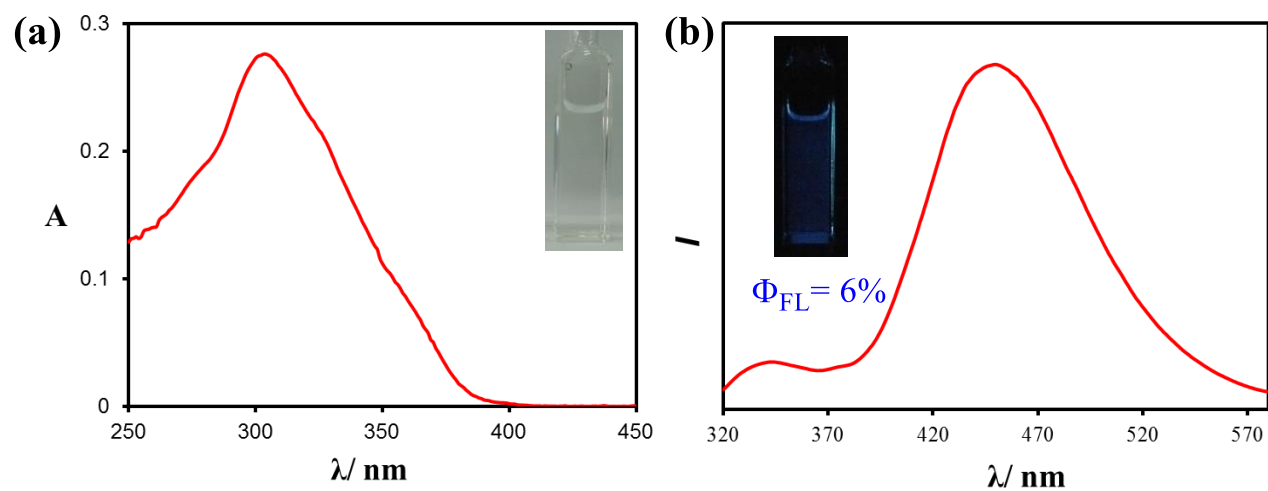

**Figure S40.** Absorption (a) and emission (b) spectra of *E*-5a in THF ( $1 \times 10^{-5}$  M) under 365 nm irradiation. Excitation wavelength was 307 nm.



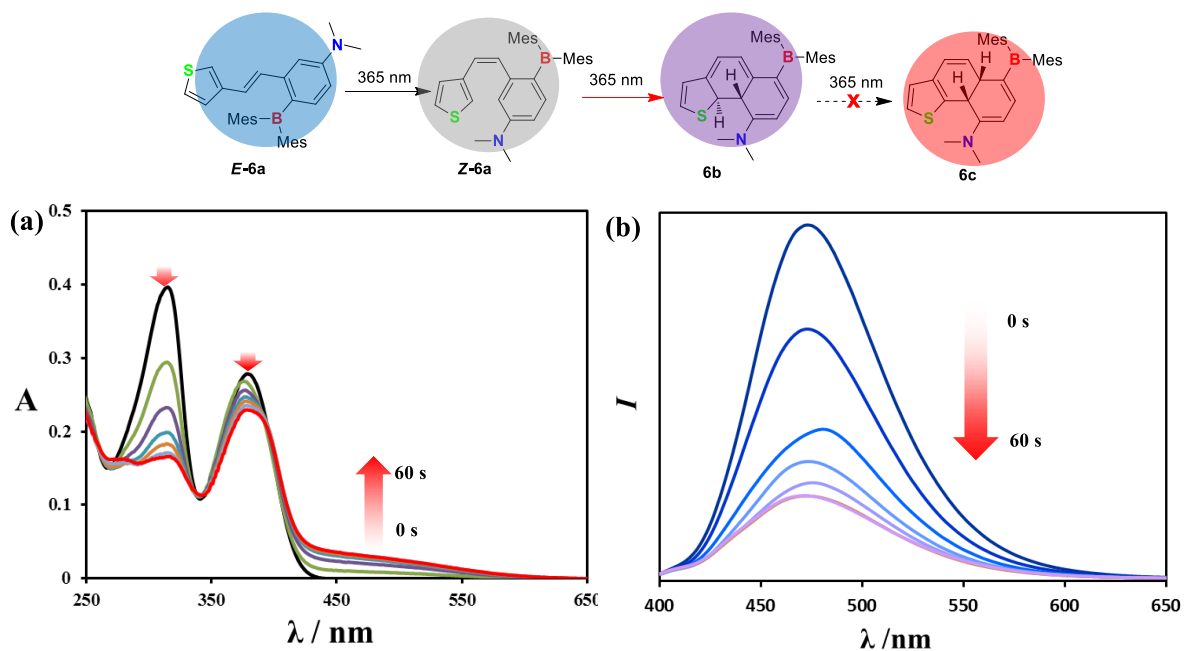

Figure S41. Absorption (a) and emission (b) spectra of *E*-6a to 6b in THF ( $1 \times 10^{-5}$  M) under 365 nm irradiation.

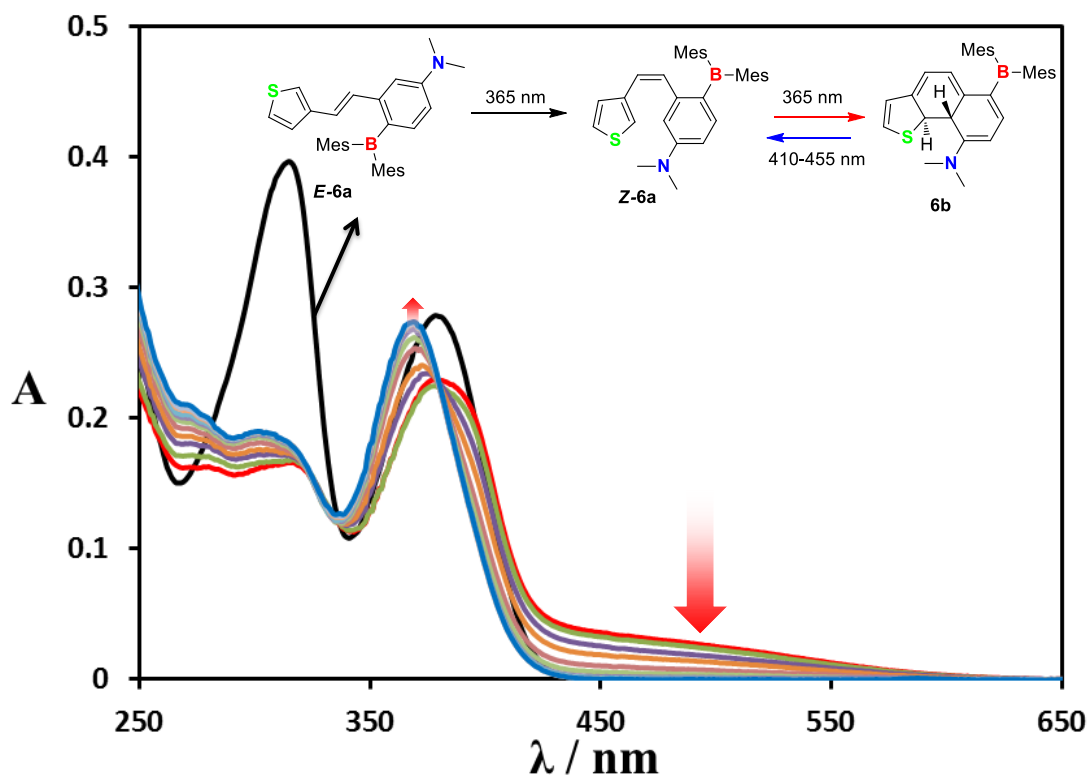

Figure S42. Absorption spectra of 6b to *Z*-6a in THF ( $1 \times 10^{-5}$  M) under 455 nm irradiation.

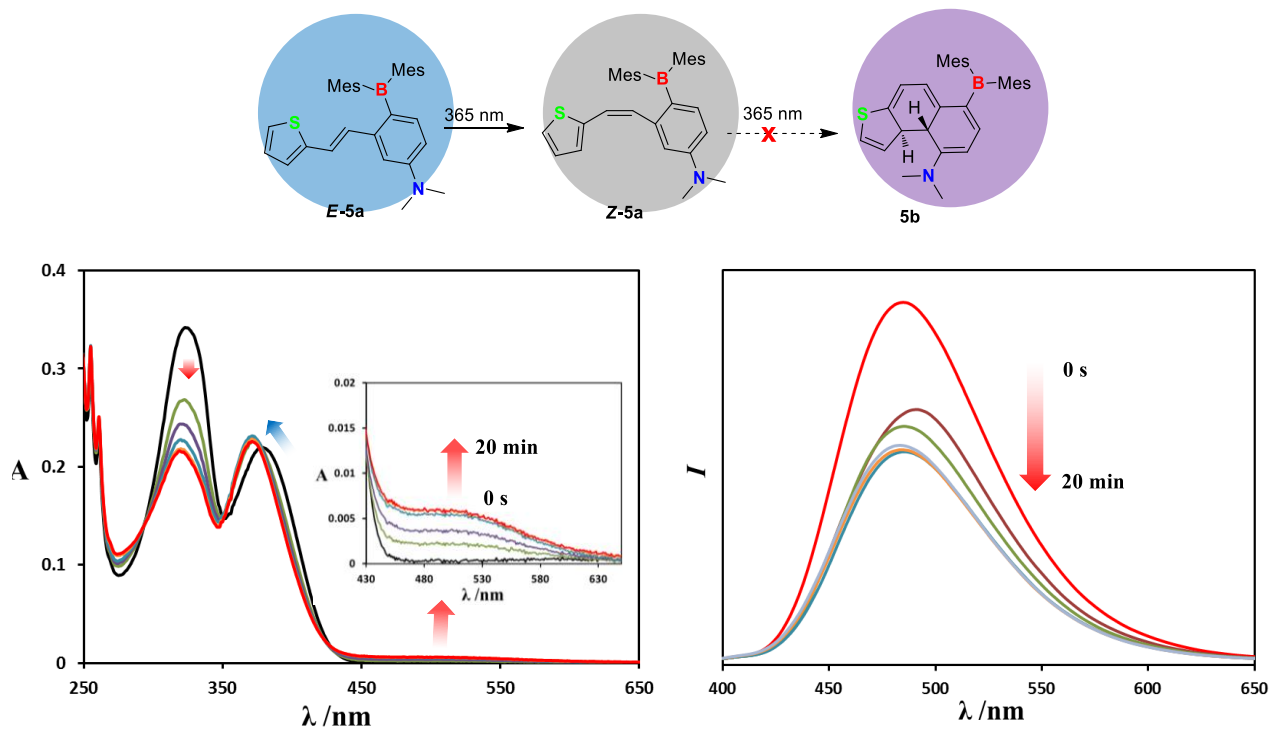

**Figure S43.** Absorption (a) and emission (b) spectra of *E*-7a to *Z*-7a in THF ( $1 \times 10^{-5}$  M) under 365 nm irradiation. Excitation wavelength was 380 nm.

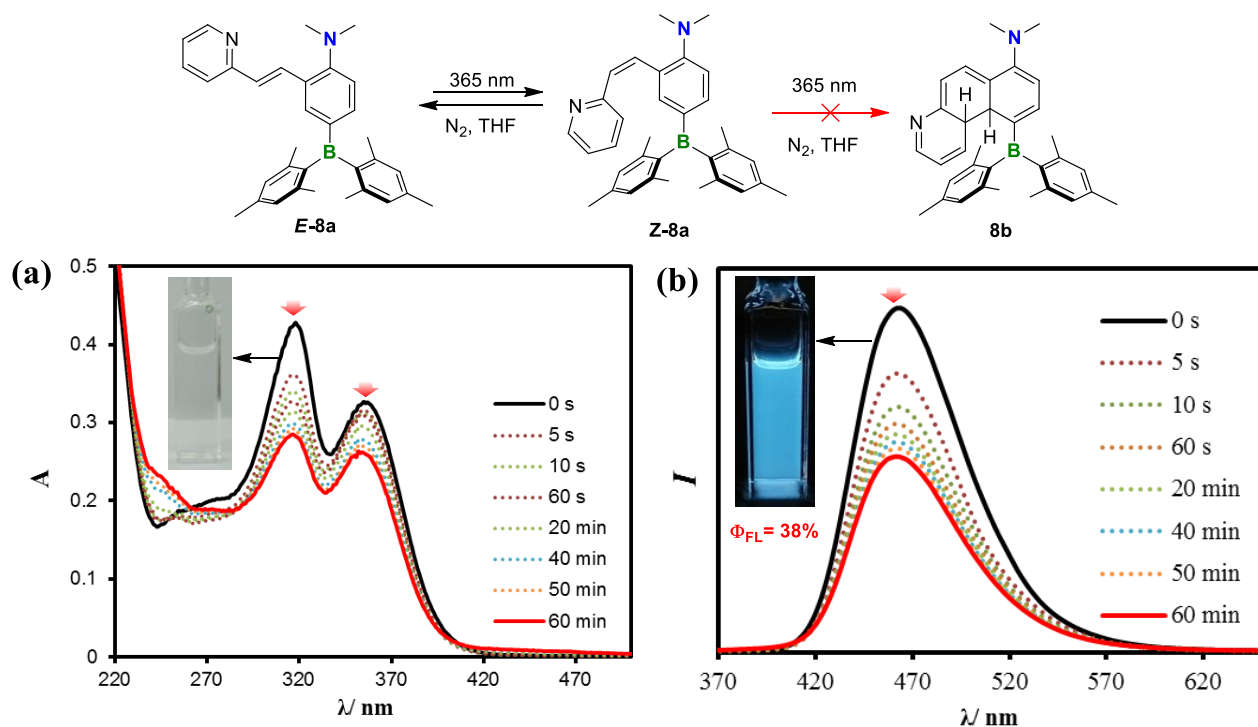

**Figure S44.** Absorption(a) and emission(b) spectra of *E*-8a in THF ( $1 \times 10^{-5}$  M) under 365 nm irradiation. Excitation wavelength was 356 nm.

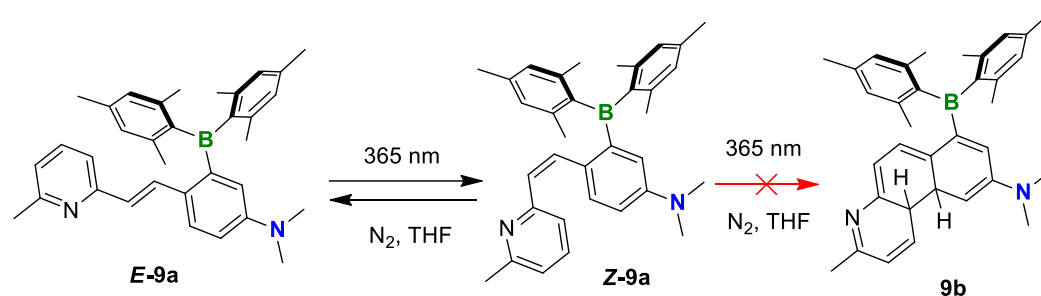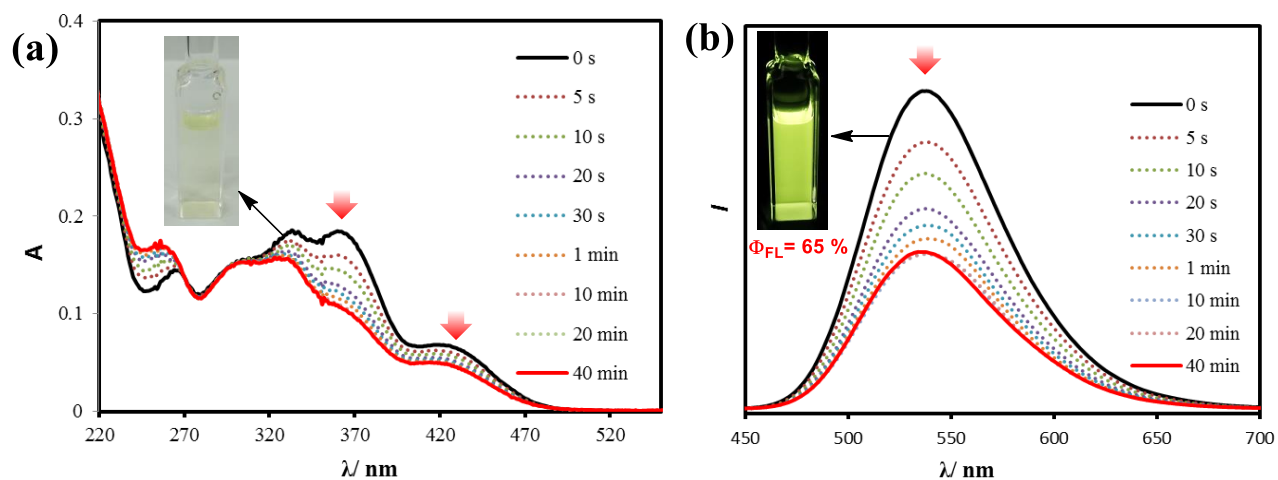

**Figure S45.** Absorption(a) and emission(b) spectra of *E-9a* in THF ( $1 \times 10^{-5}$  M) under 365 nm irradiation. Excitation wavelength was 420 nm.

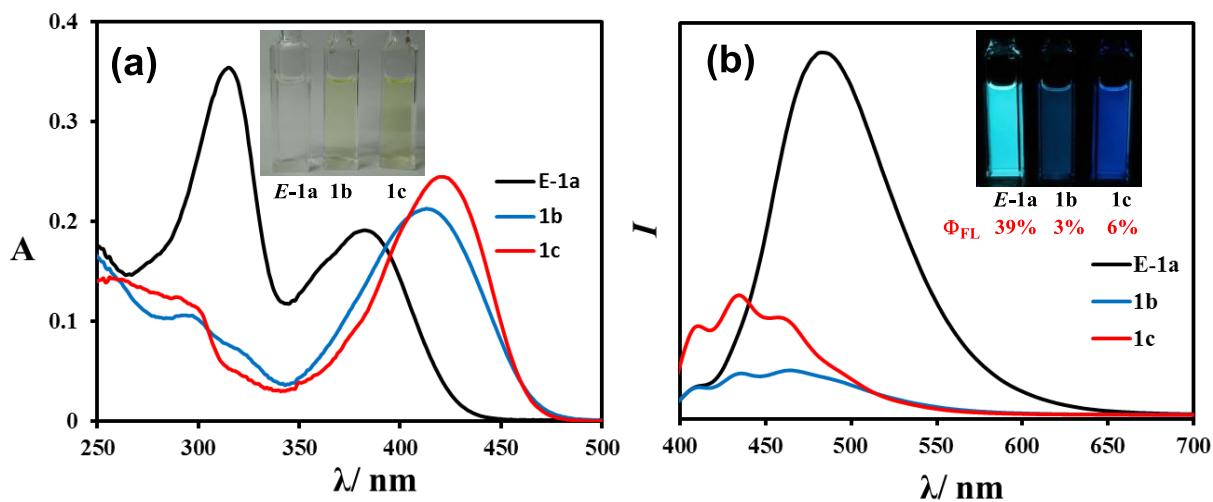

**Figure S46.** Absorption (a) and emission (b) spectra of *E-1a*, **1b** and **1c** in THF ( $1 \times 10^{-5}$  M). Excitation wavelength was 382 nm.

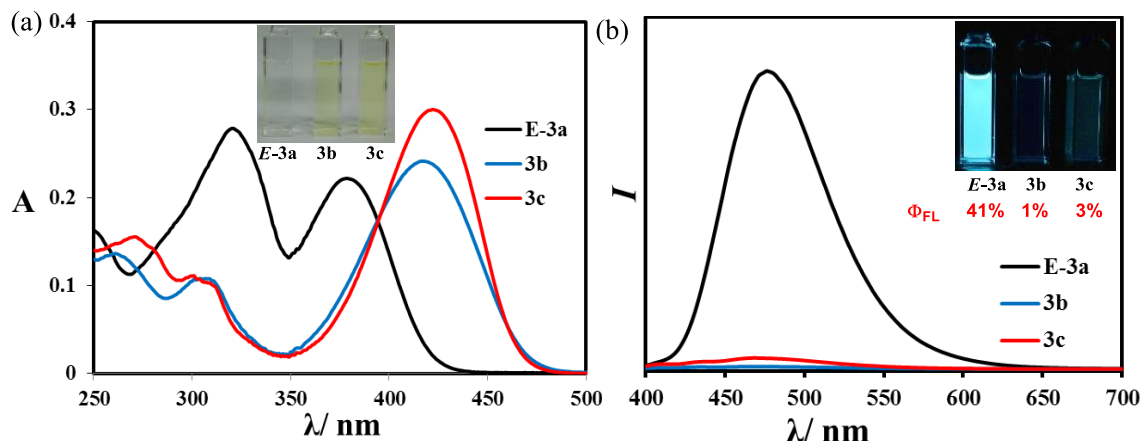

**Figure S47.** Absorption (a) and emission (b) spectra of *E*-3a, **3b** and **3c** in THF ( $1 \times 10^{-5}$  M). Excitation wavelength was 379 nm.

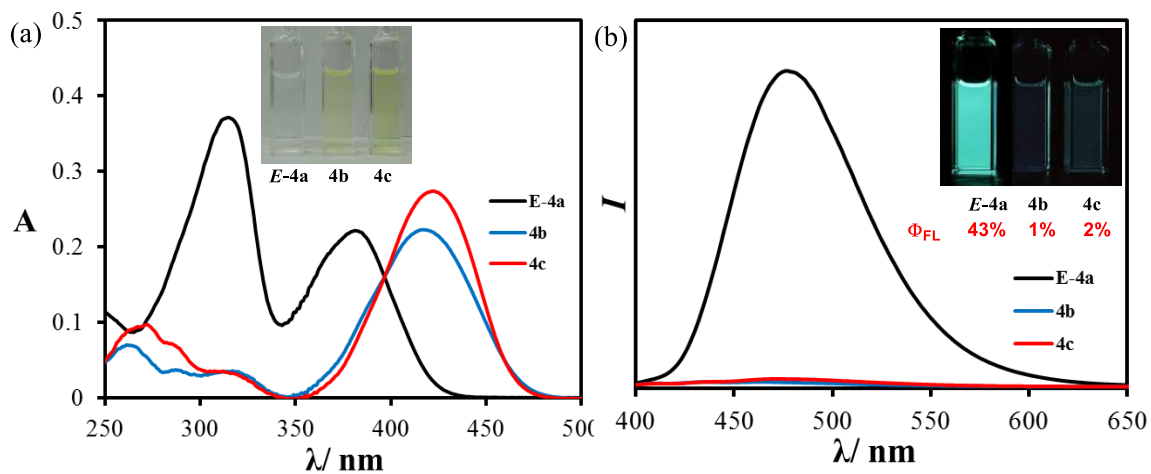

**Figure S48.** Absorption (a) and emission (b) spectra of *E*-4a, **4b** and **4c** in THF ( $1 \times 10^{-5}$  M). Excitation wavelength was 382 nm.

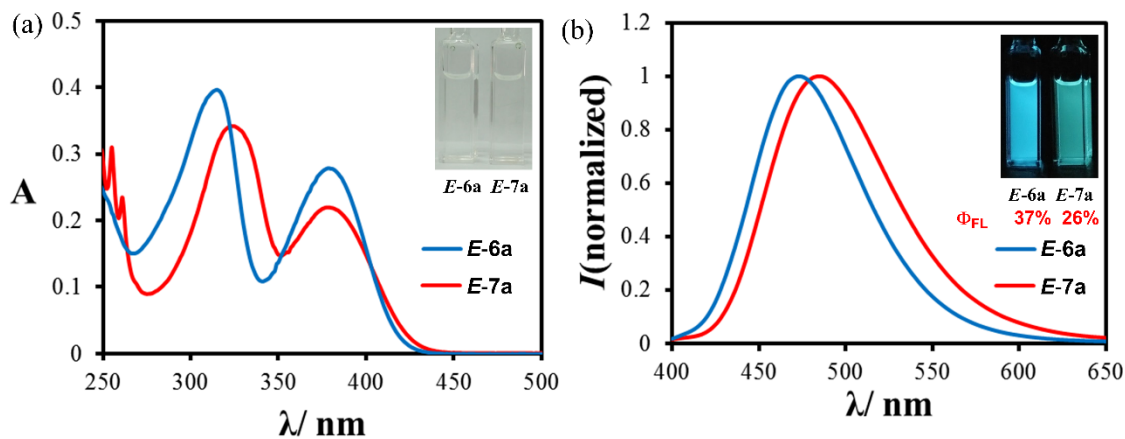

**Figure S49.** Absorption (a) and emission (b) spectra of *E*-6a and *E*-7a in THF ( $1 \times 10^{-5}$  M). Excitation wavelength was 380 nm.

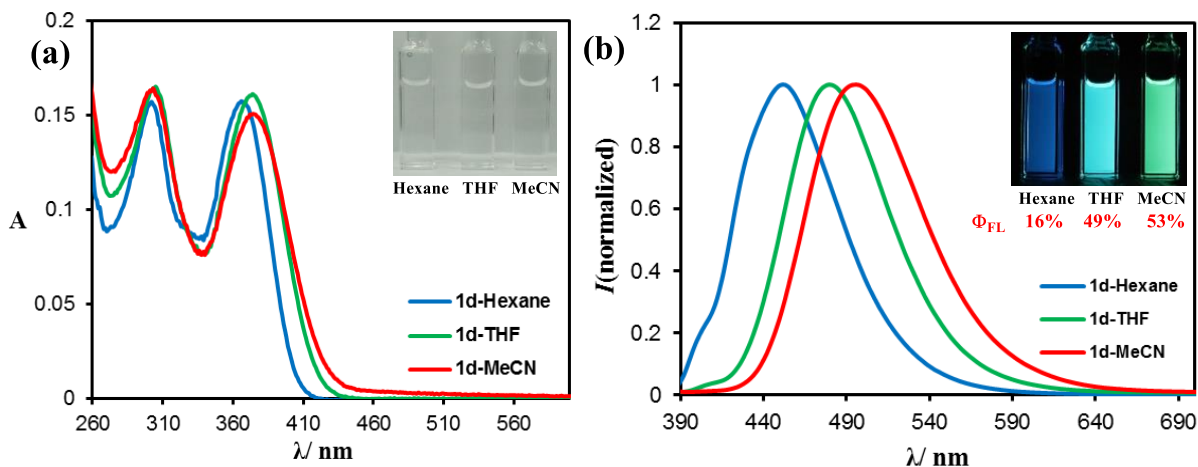

**Figure S50.** Absorption (a) and emission spectra (b) of **1d** in various solvents ( $1 \times 10^{-5}$  M). The fluorescence spectra were recorded at  $\lambda_{\max}$  of absorption.

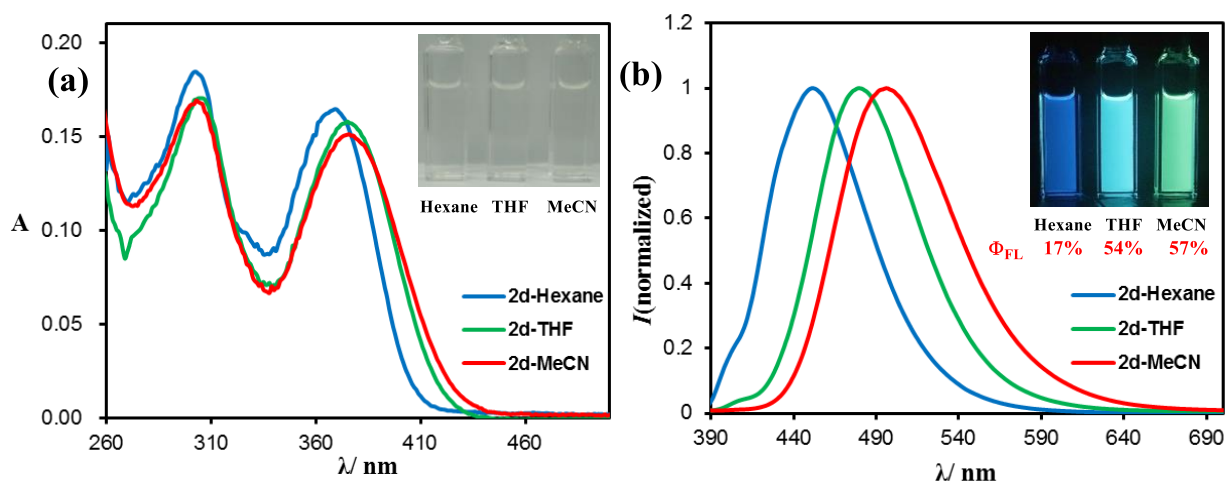

**Figure S51.** Absorption (a) and emission spectra (b) of **2d** in various solvents ( $1 \times 10^{-5}$  M). The fluorescence spectra were recorded at  $\lambda_{\max}$  of absorption.

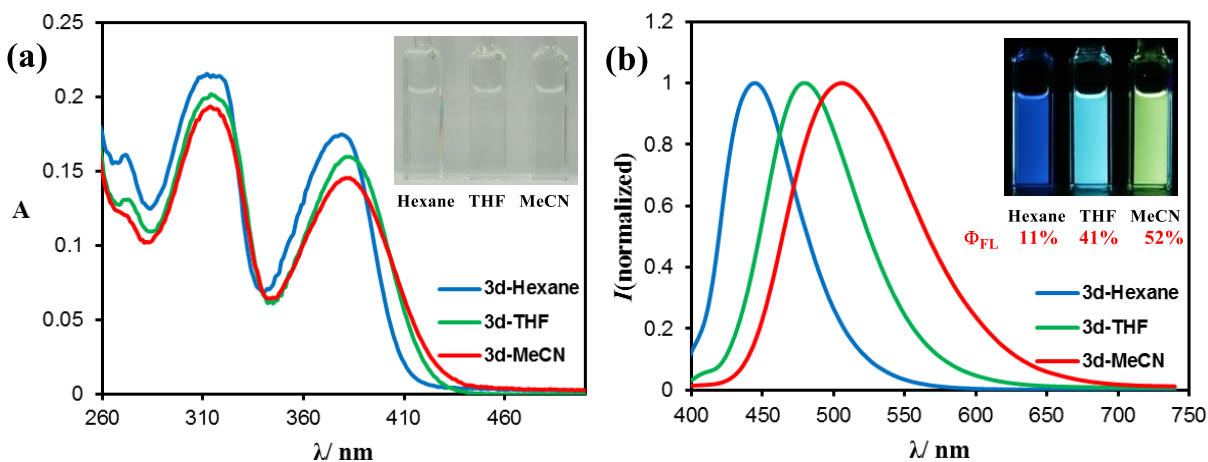

**Figure S52.** Absorption (a) and emission spectra (b) of **3d** in various solvents ( $1 \times 10^{-5}$  M). The fluorescence spectra were recorded at  $\lambda_{\max}$  of absorption.

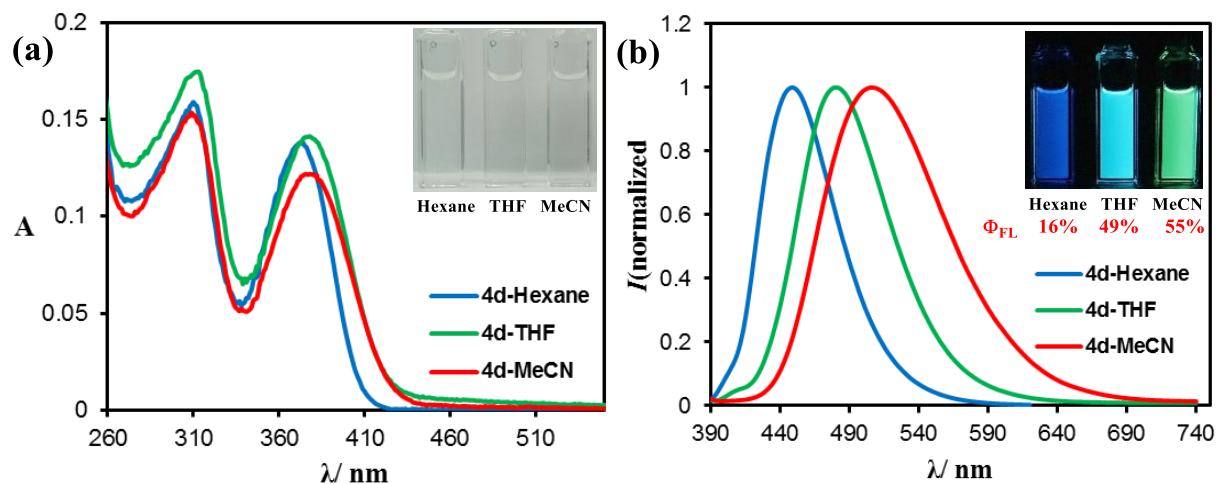

**Figure S53.** Absorption (a) and emission spectra (b) of **4d** in various solvents ( $1 \times 10^{-5}$  M). The fluorescence spectra were recorded at  $\lambda_{\text{max}}$  of absorption.

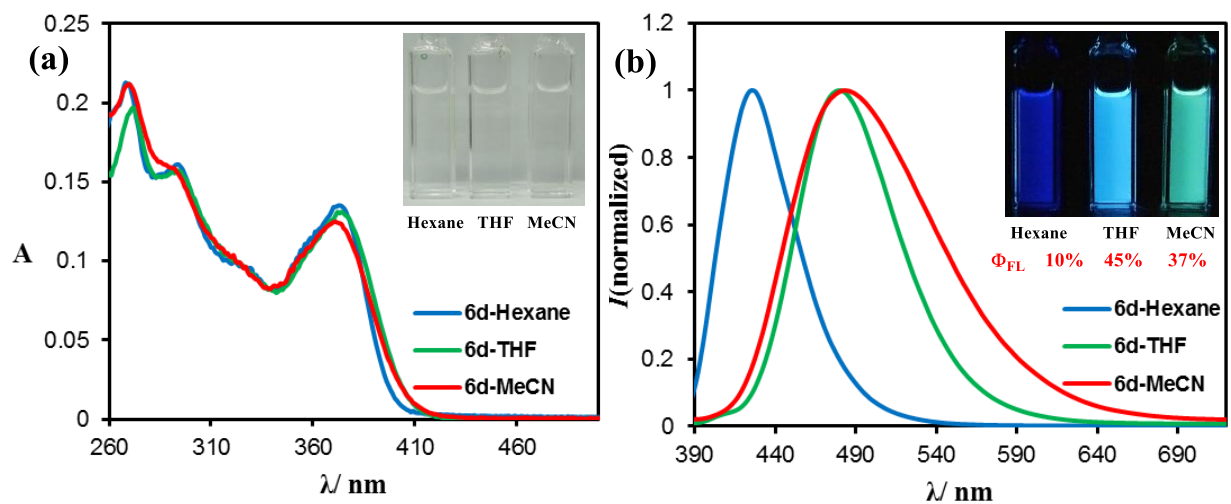

**Figure S54.** Absorption (a) and emission spectra (b) of **6d** in various solvents ( $1 \times 10^{-5}$  M). The fluorescence spectra were recorded at  $\lambda_{\text{max}}$  of absorption.

## S6: H/D Exchange and Kinetic Data

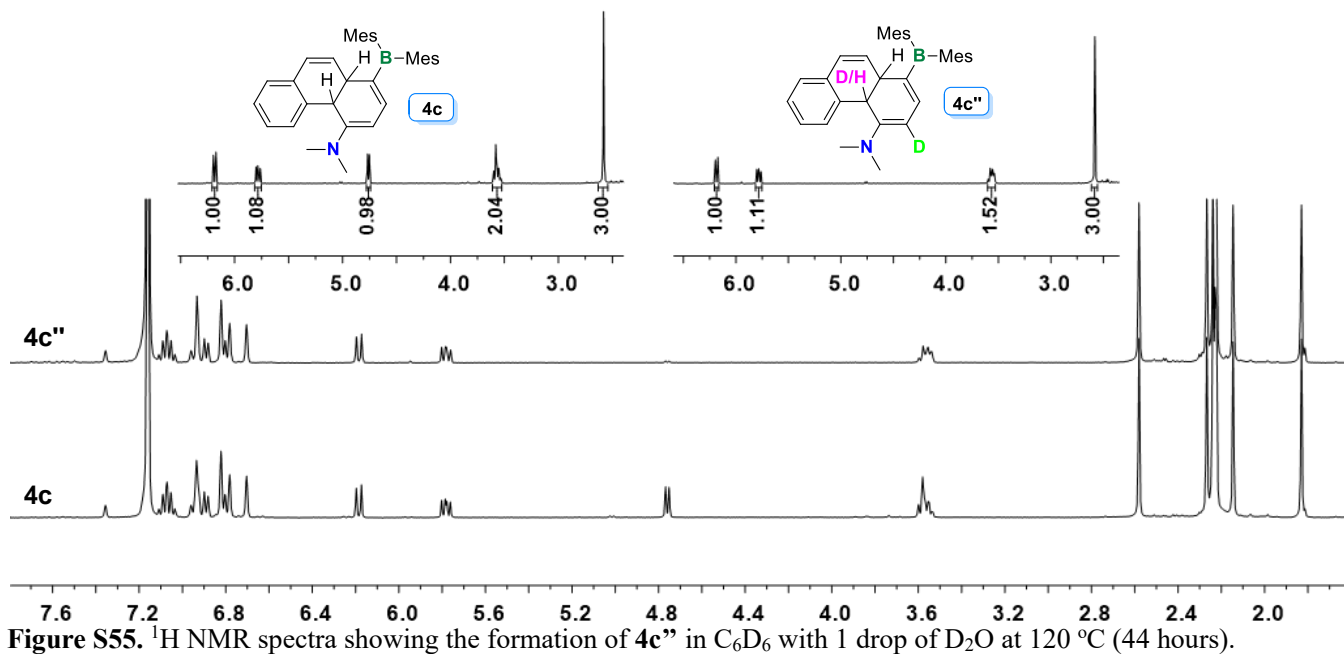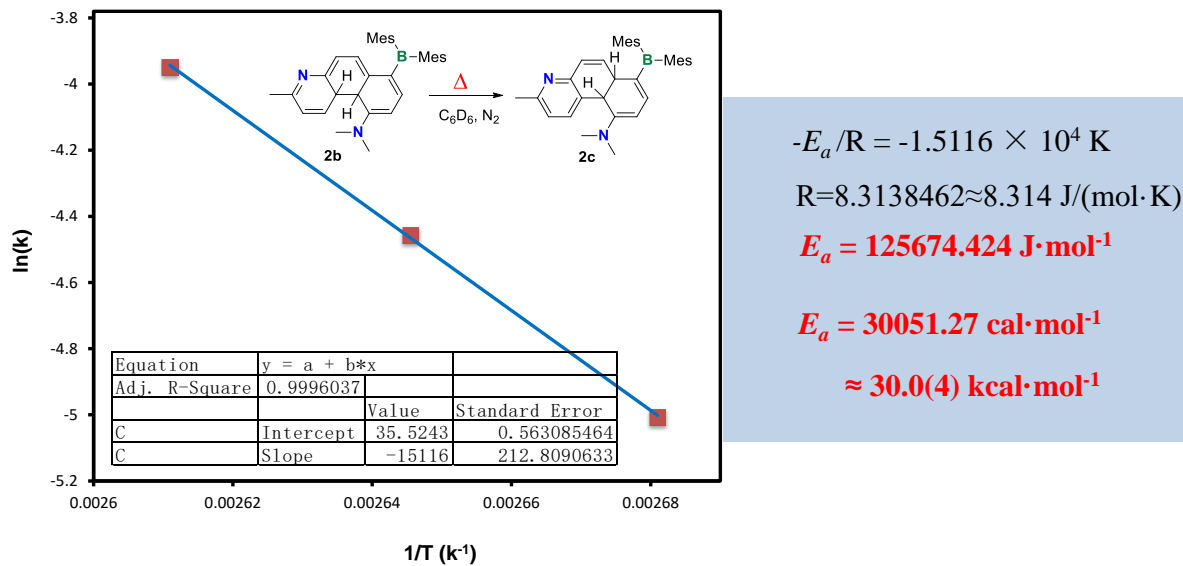

Figure S56. Arrhenius plot of the rate constants for **2b** to **2c**.

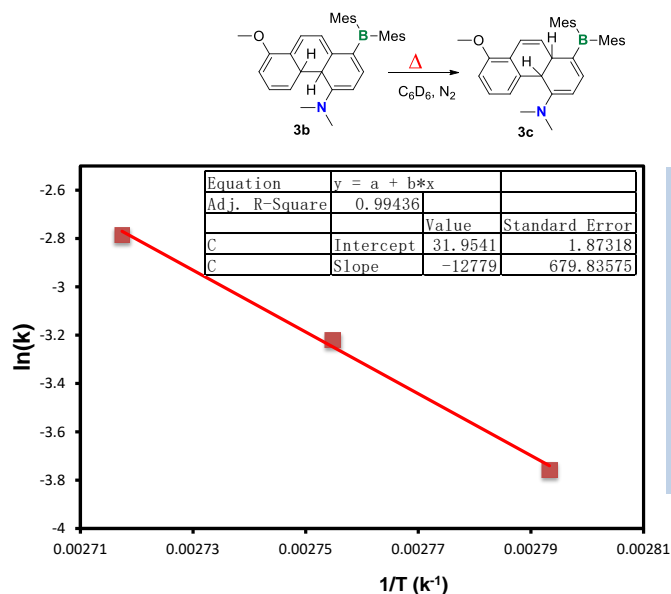

$-E_a/R = -1.2779 \times 10^4 \text{ K}$   
 $R = 8.3138462 \approx 8.314 \text{ J}/(\text{mol} \cdot \text{K})$   
 $E_a = 106244.61 \text{ J} \cdot \text{mol}^{-1}$   
 $E_a = 25405.21 \text{ cal} \cdot \text{mol}^{-1}$   
 $\approx 25(1) \text{ kcal} \cdot \text{mol}^{-1}$

Figure S57. Arrhenius plot of the rate constants for **3b** to **3c**.

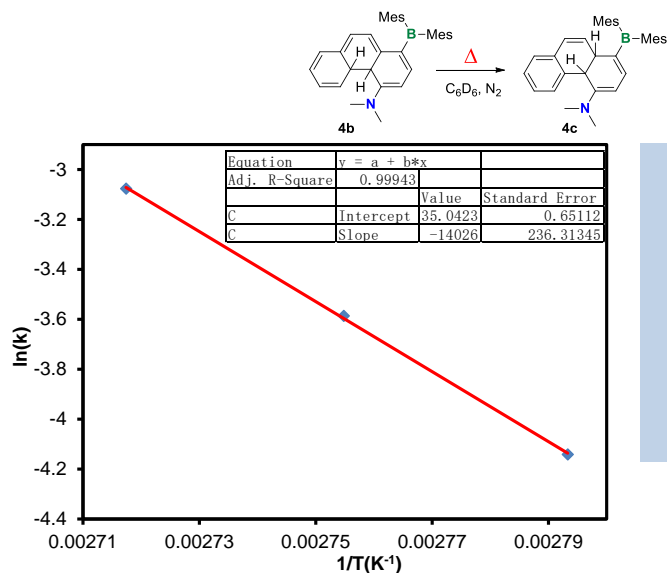

$-E_a/R = -1.4026 \times 10^4 \text{ K}$   
 $R = 8.3138462 \approx 8.314 \text{ J}/(\text{mol} \cdot \text{K})$   
 $E_a = 116612.16 \text{ J} \cdot \text{mol}^{-1}$   
 $E_a = 27884.30 \text{ cal} \cdot \text{mol}^{-1}$   
 $\approx 27.9(5) \text{ kcal} \cdot \text{mol}^{-1}$

Figure S58. Arrhenius plot of the rate constants for **4b** to **4c**.



## S7: Characterization Data

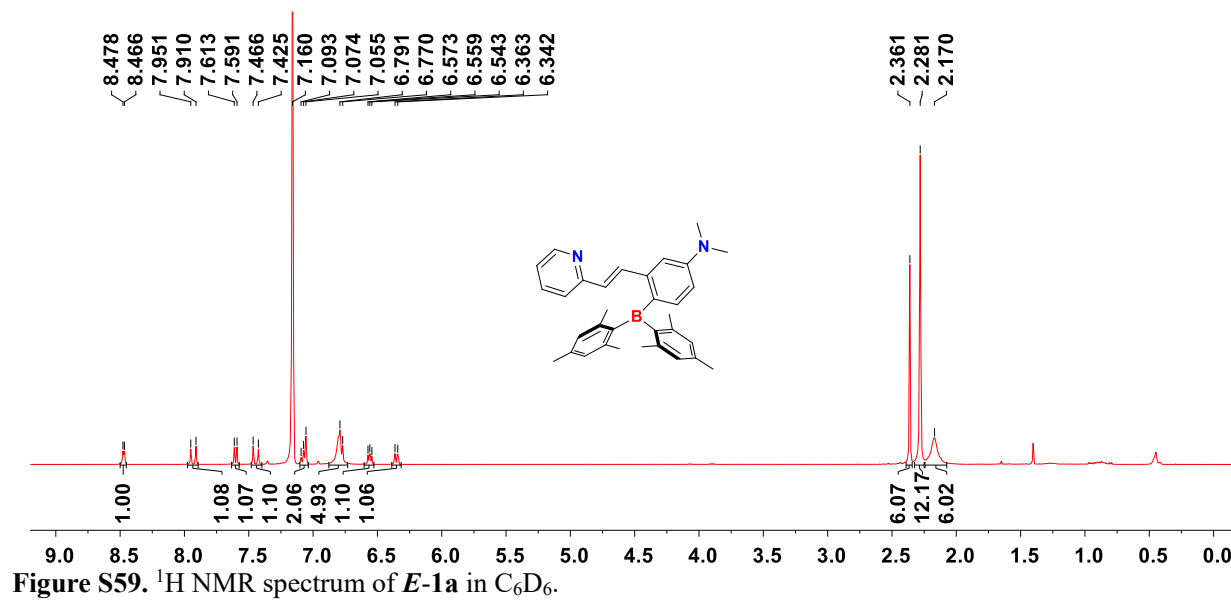

Figure S59.  $^1\text{H}$  NMR spectrum of *E*-1a in  $\text{C}_6\text{D}_6$ .

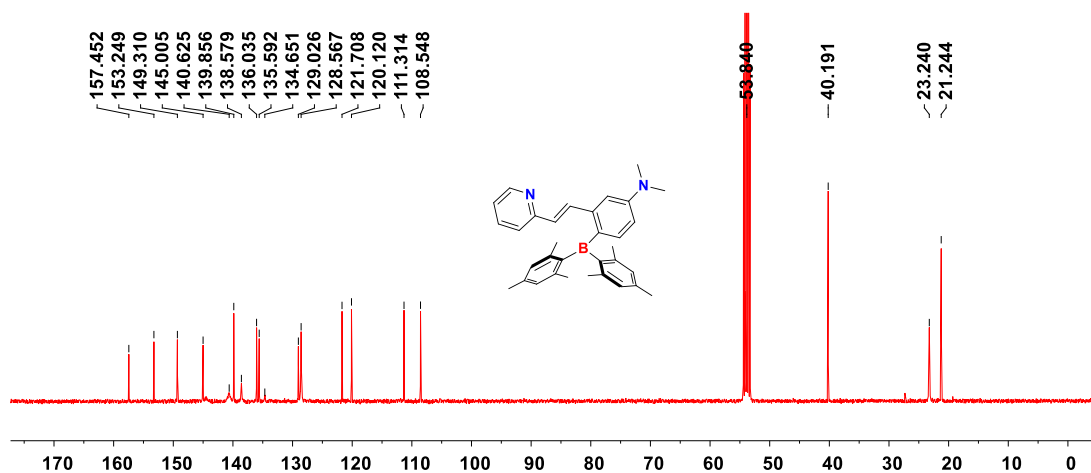

Figure S60.  $^{13}\text{C}$  NMR spectra of *E*-1a in  $\text{CD}_2\text{Cl}_2$ .

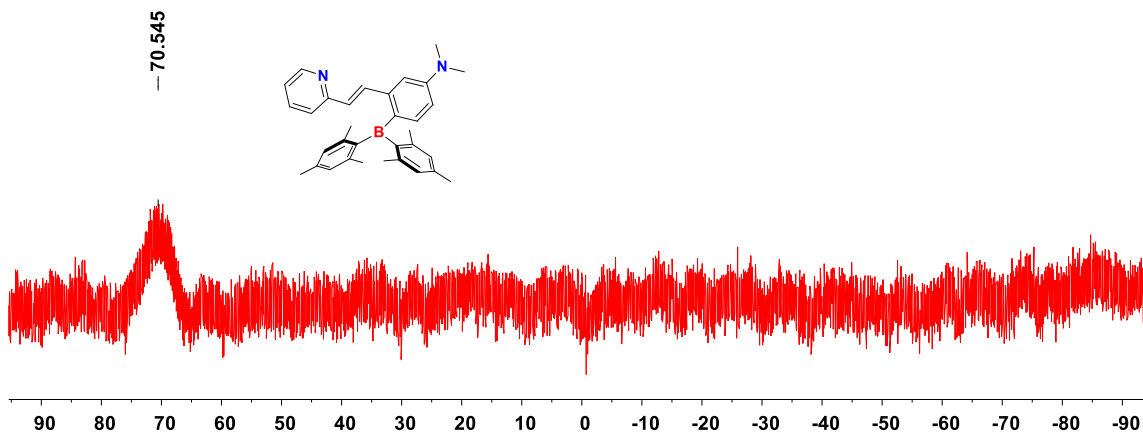

Figure S61.  $^{11}\text{B}$  NMR spectrum of *E*-1a in  $\text{C}_6\text{D}_6$ .

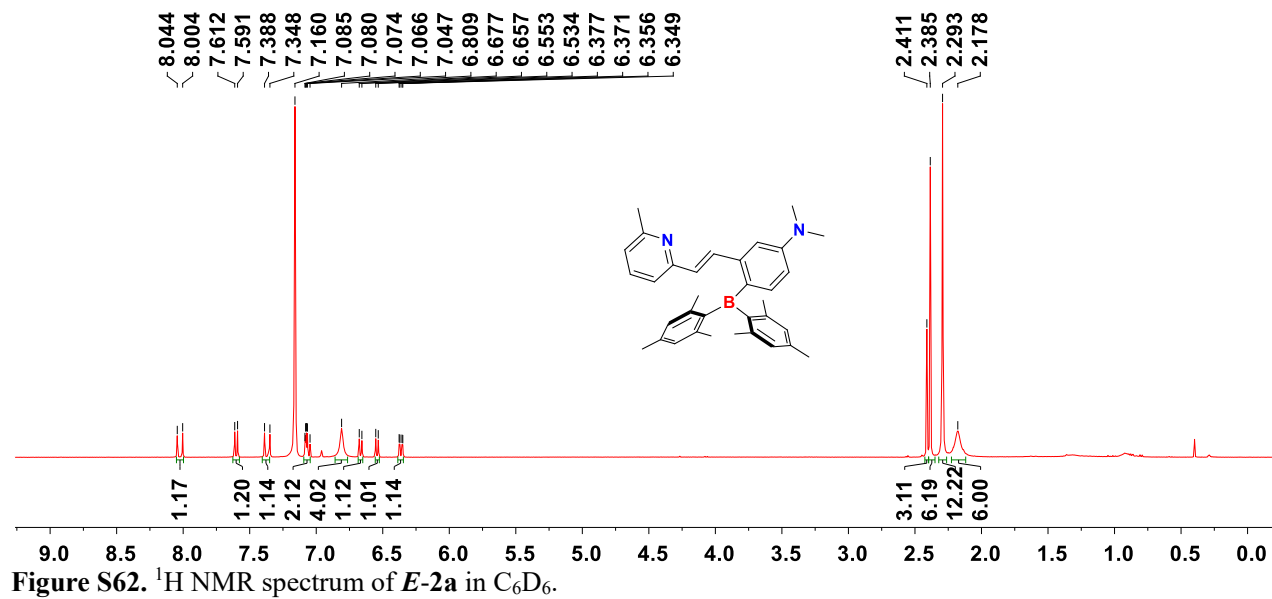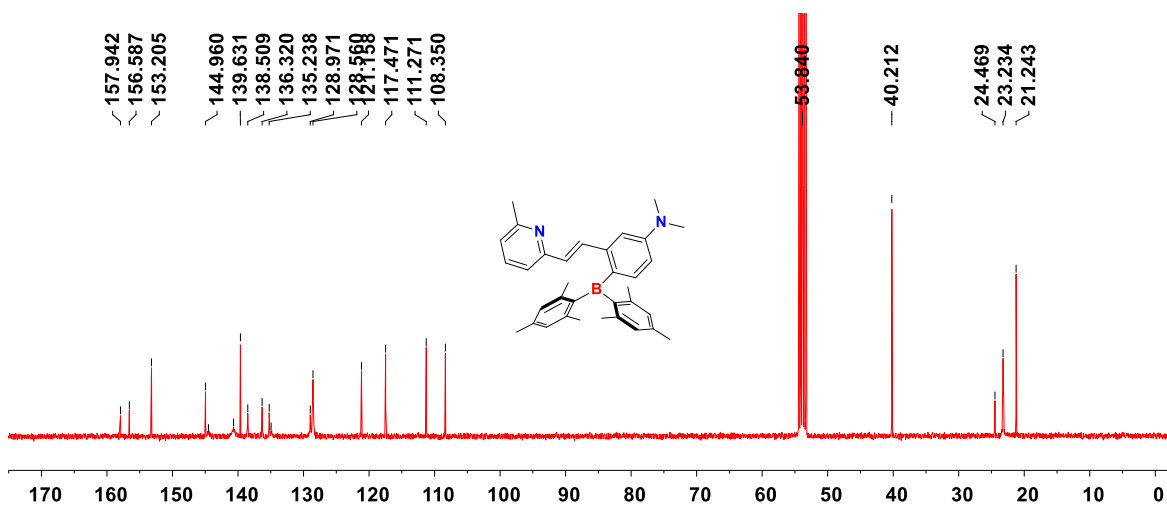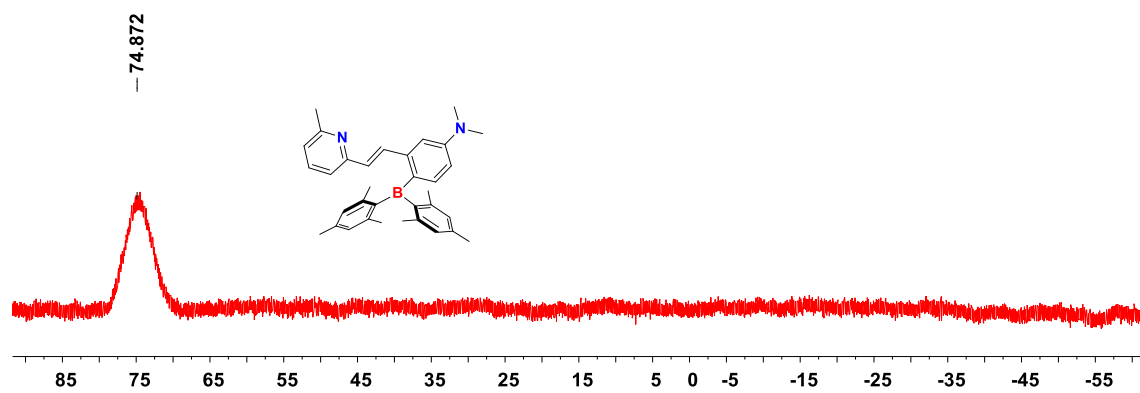

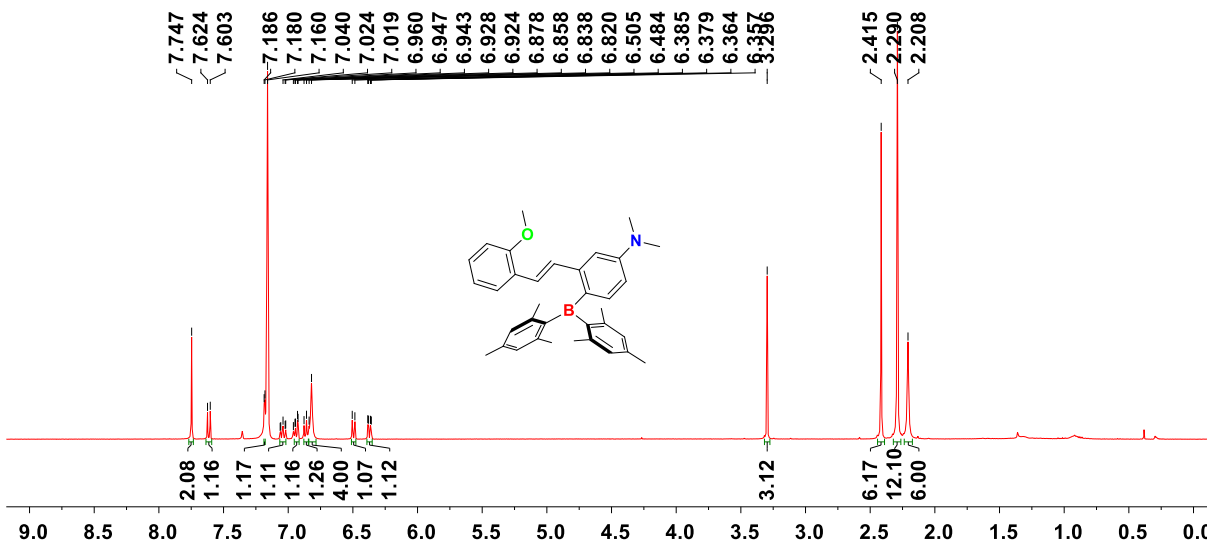

Figure S65.  $^1\text{H}$  NMR spectrum of *E*-3a in  $\text{C}_6\text{D}_6$ .

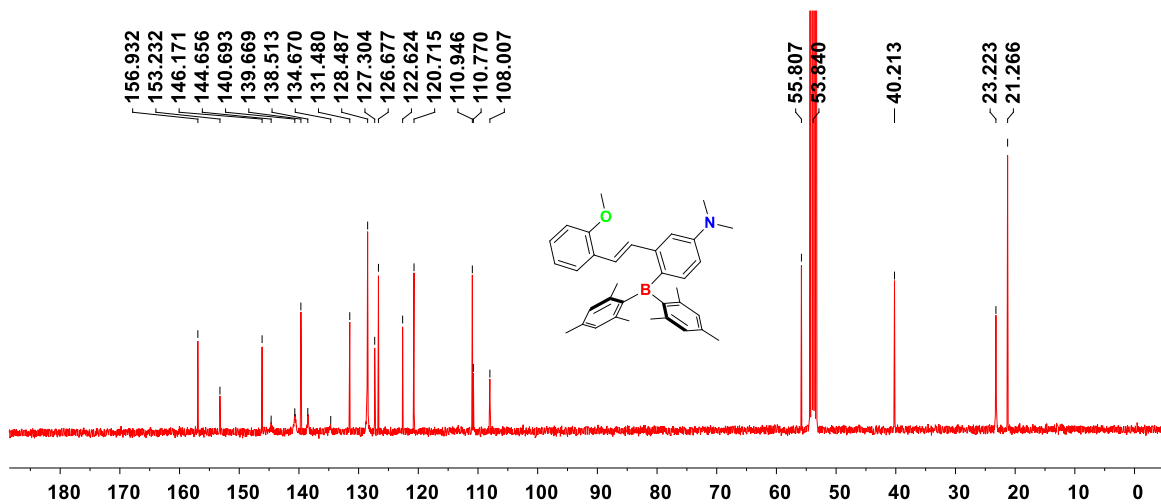

Figure S66.  $^{13}\text{C}$  NMR spectra of *E*-3a in  $\text{CD}_2\text{Cl}_2$ .

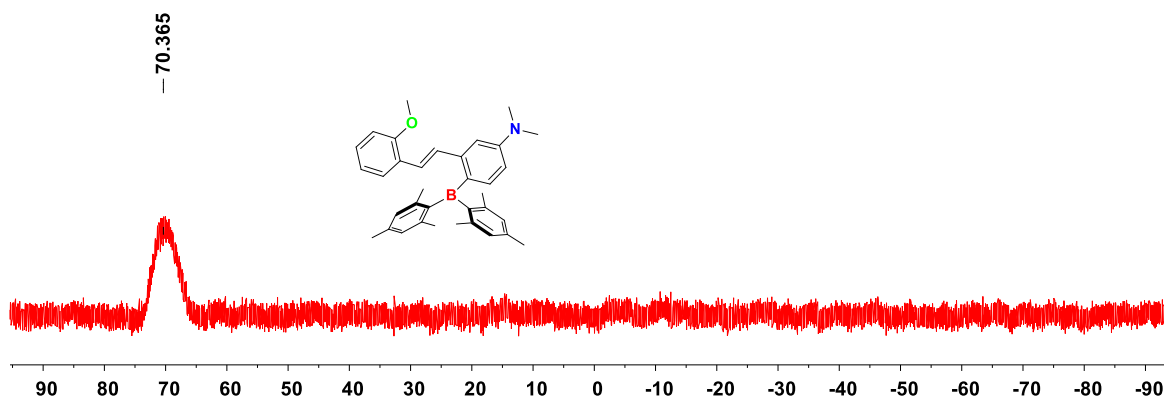

Figure S67.  $^{11}\text{B}$  NMR spectrum of *E*-3a in  $\text{C}_6\text{D}_6$ .

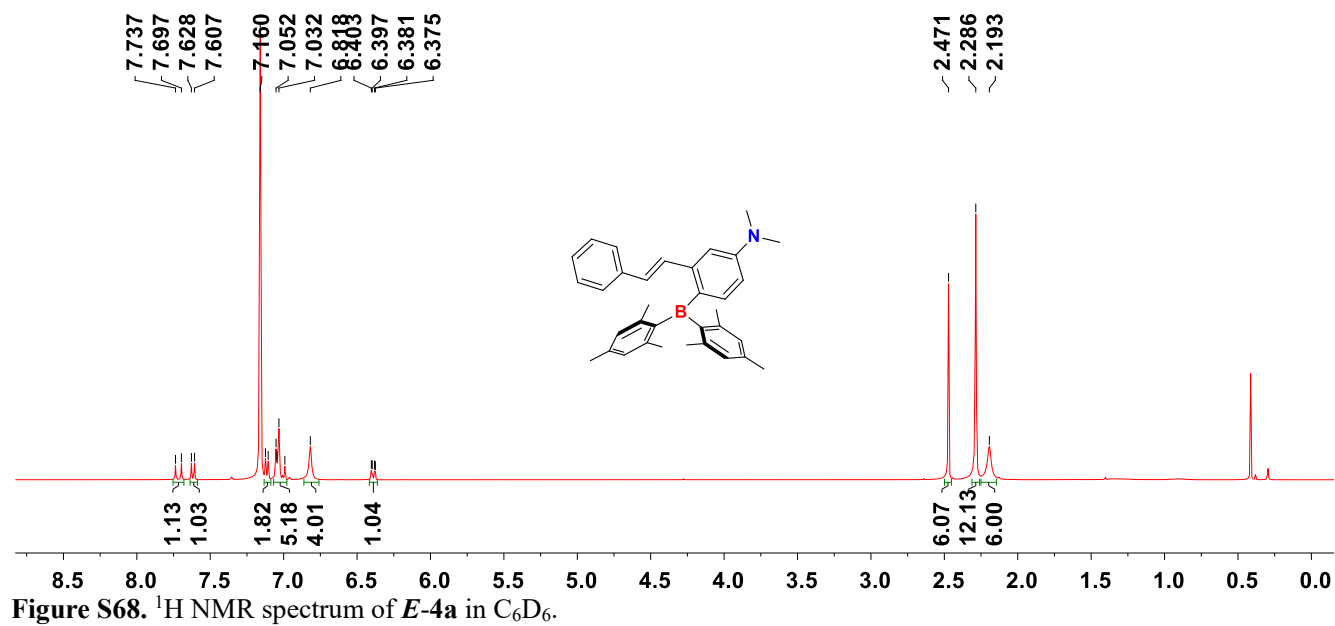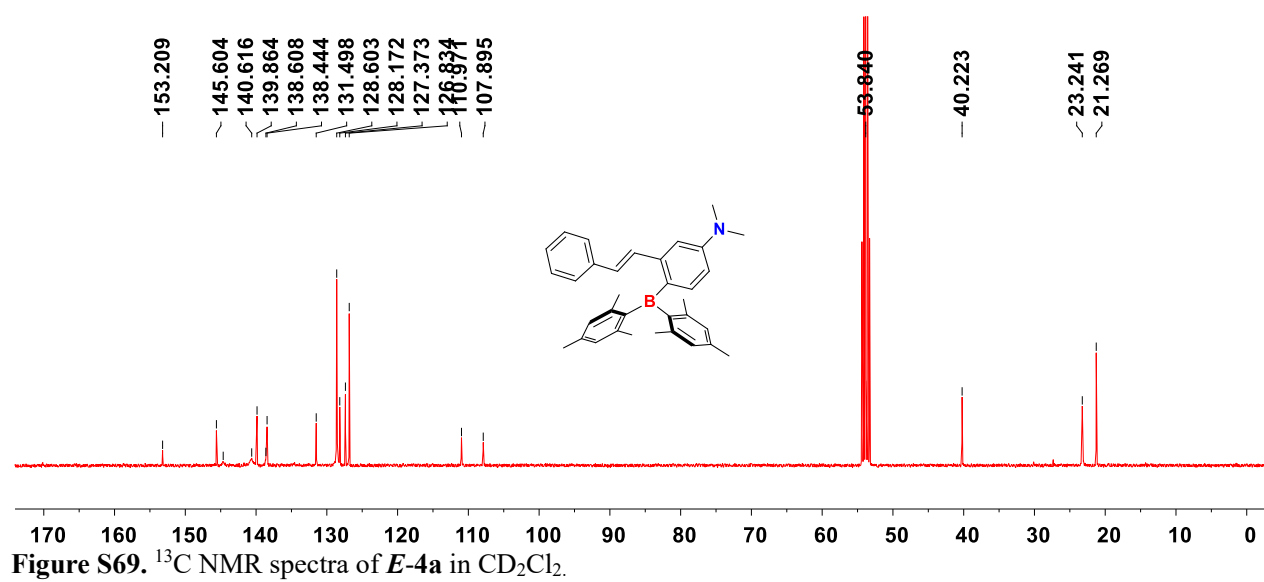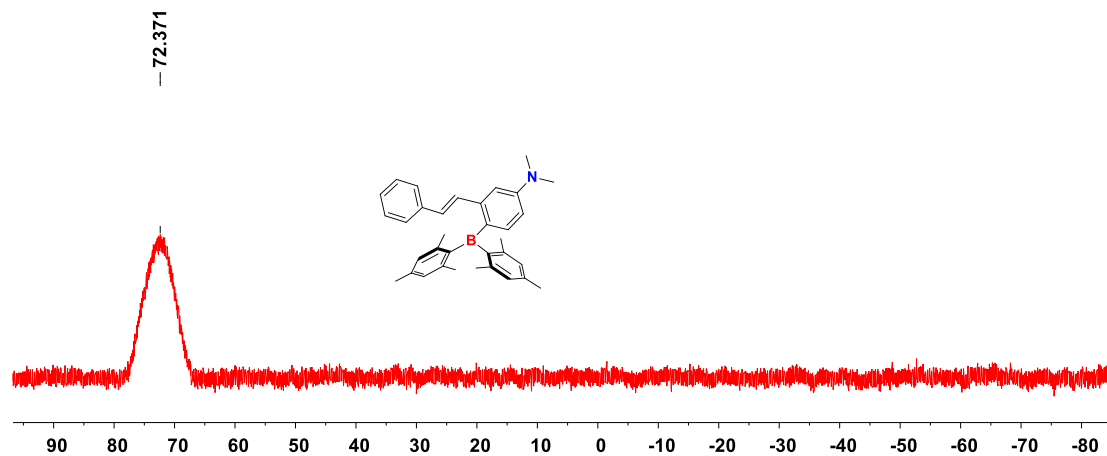

Figure S70.  $^{11}\text{B}$  NMR spectra of *E-4a* in  $\text{CD}_2\text{Cl}_2$ .

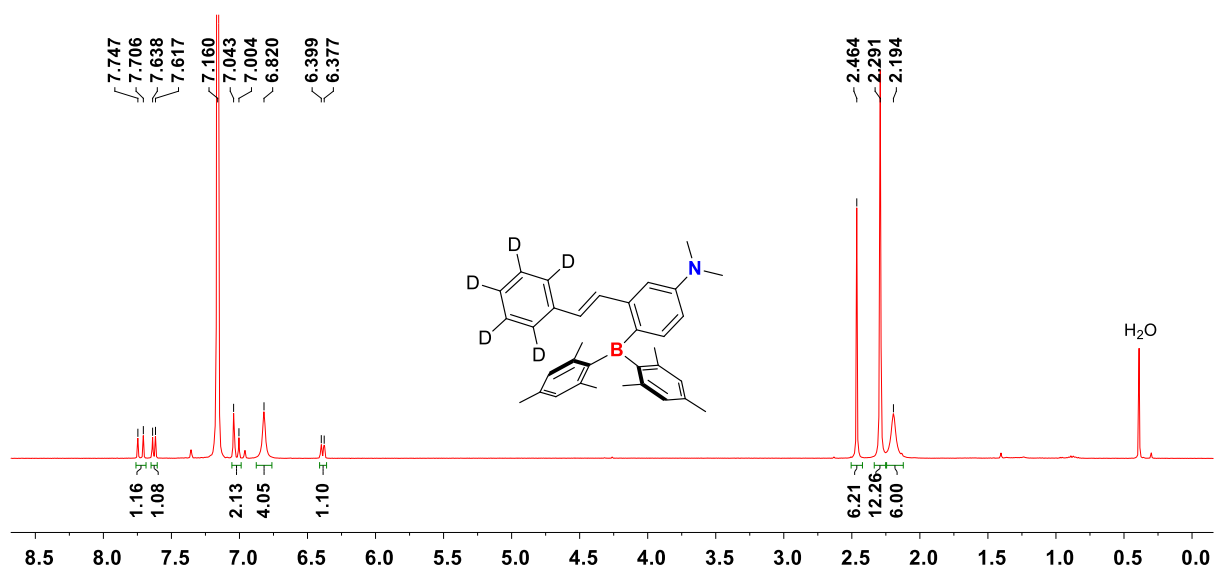

Figure S71.  $^1\text{H}$  NMR spectra of *E-4a'* in  $\text{C}_6\text{D}_6$ .

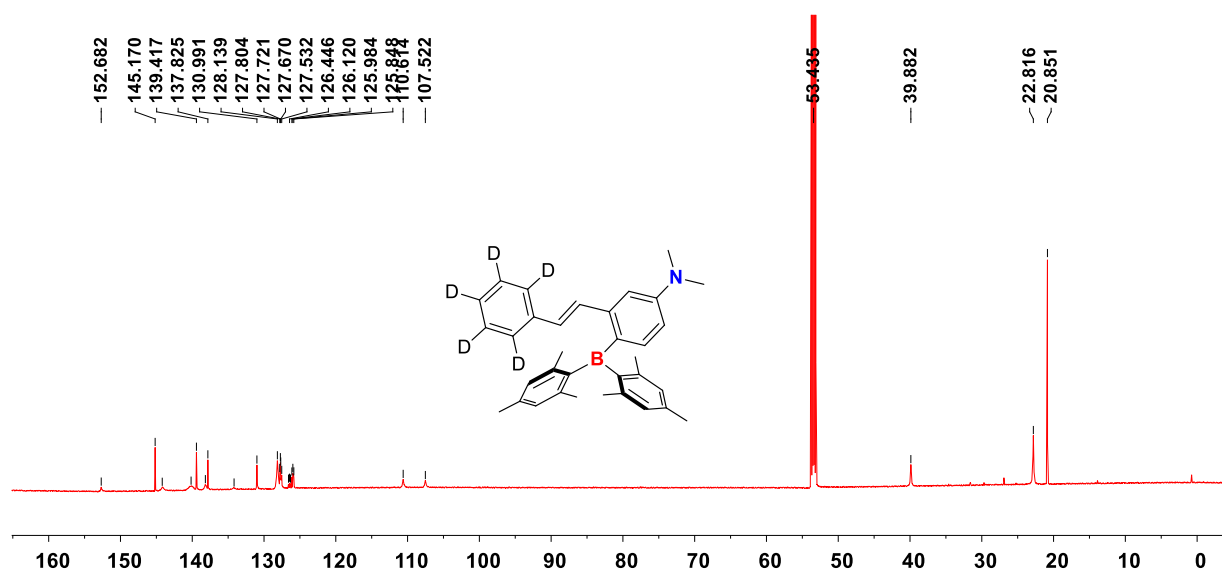

Figure S72.  $^{13}\text{C}$  NMR spectra of *E-4a'* in  $\text{CD}_2\text{Cl}_2$ .

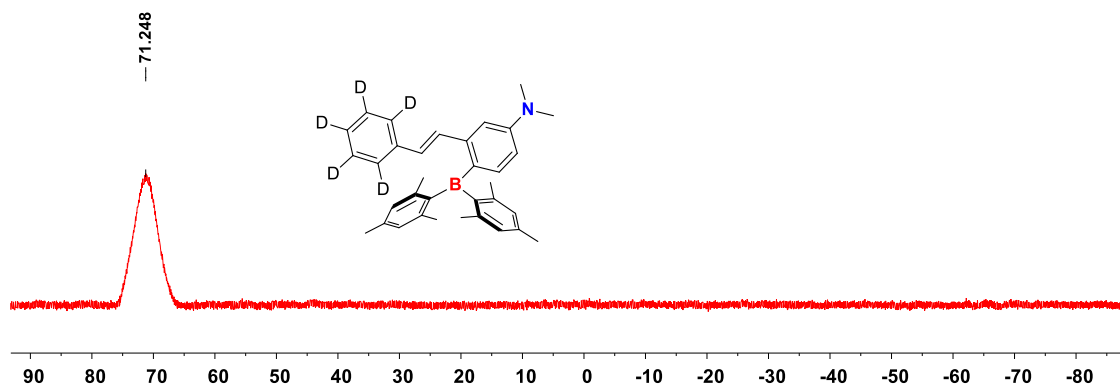

Figure S73.  $^{11}\text{B}$  NMR spectra of *E-4a'* in  $\text{CD}_2\text{Cl}_2$ .

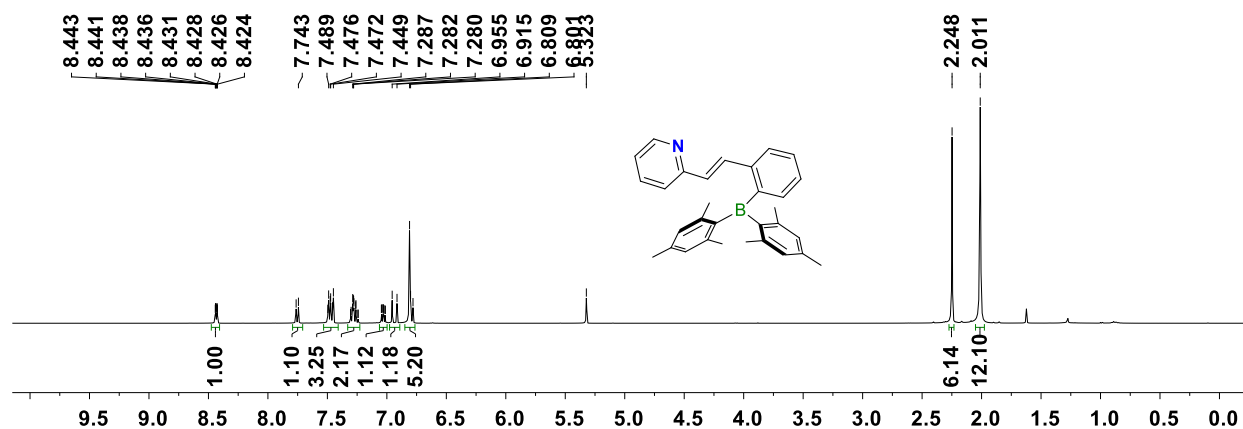

Figure S74. <sup>1</sup>H NMR spectrum of *E*-5a in CD<sub>2</sub>Cl<sub>2</sub>.

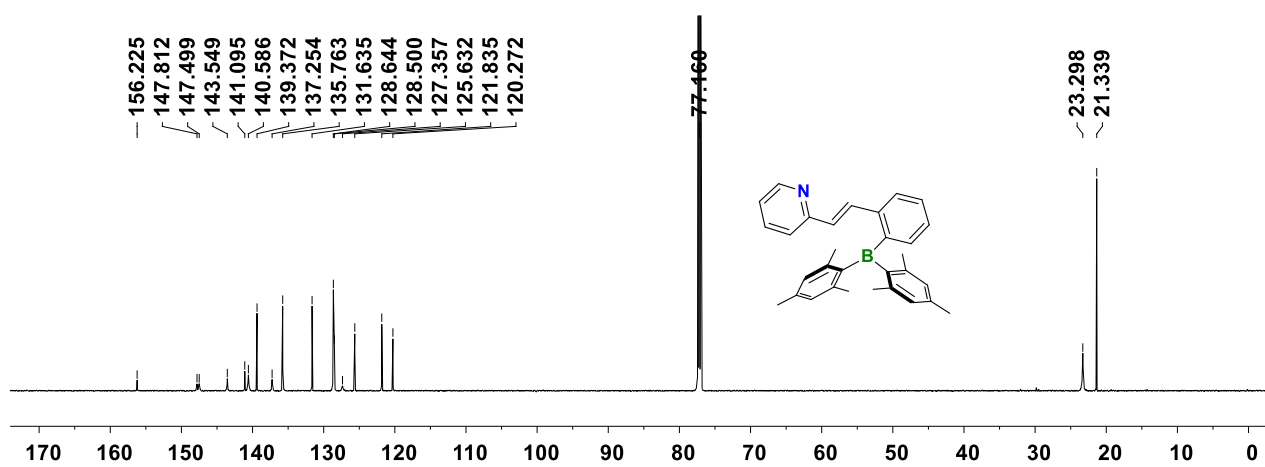

Figure S75. <sup>13</sup>C NMR spectrum of *E*-5a in CDCl<sub>3</sub>.

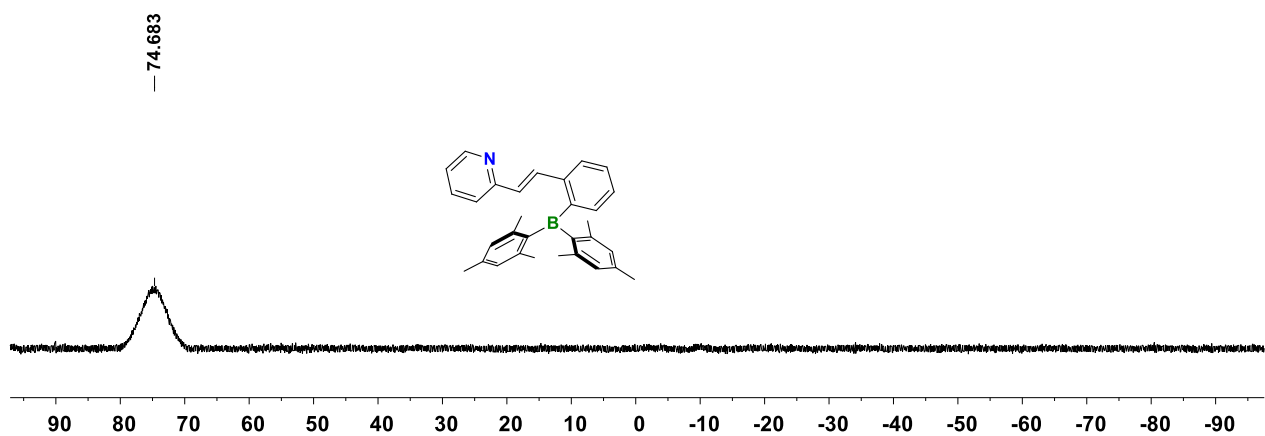

Figure S76. <sup>11</sup>B NMR spectrum of *E*-5a in C<sub>6</sub>D<sub>6</sub>.

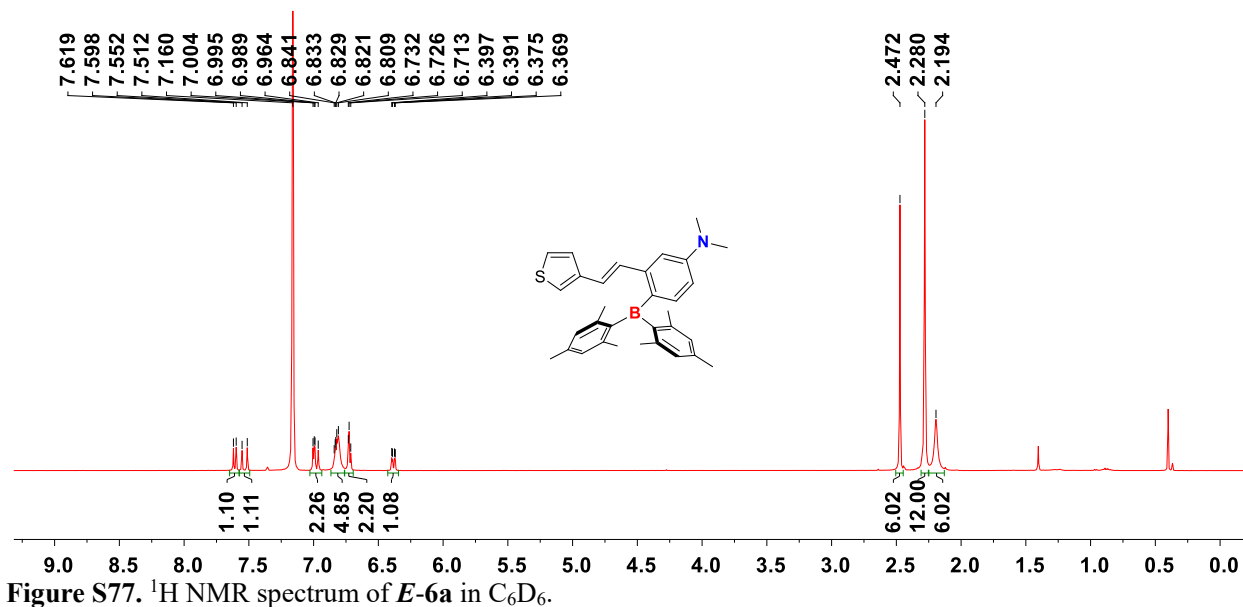

Figure S77.  $^1\text{H}$  NMR spectrum of *E*-6a in  $\text{C}_6\text{D}_6$ .

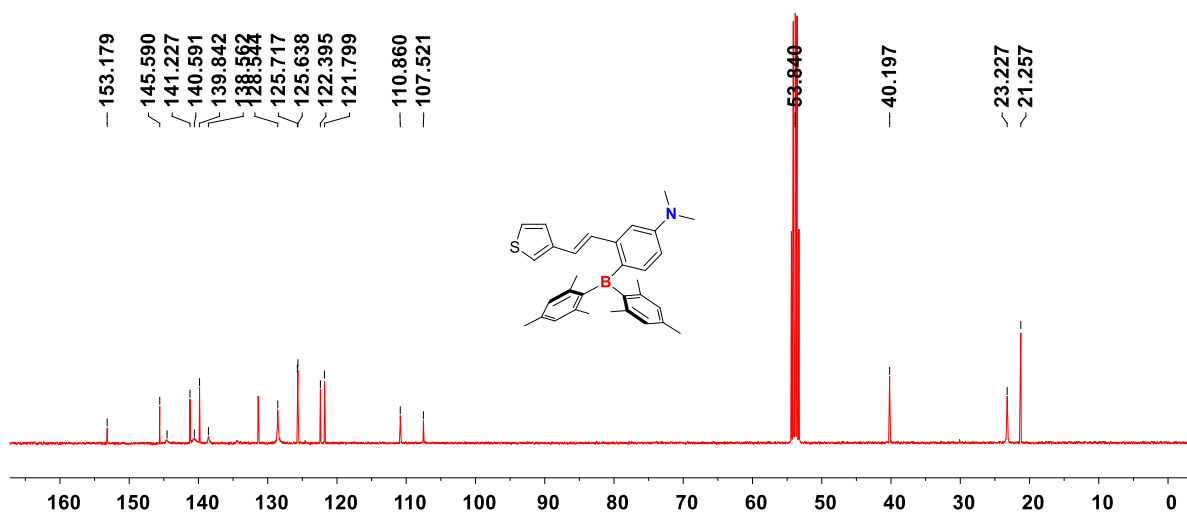

Figure S78.  $^{13}\text{C}$  NMR spectra of *E*-6a in  $\text{CD}_2\text{Cl}_2$ .

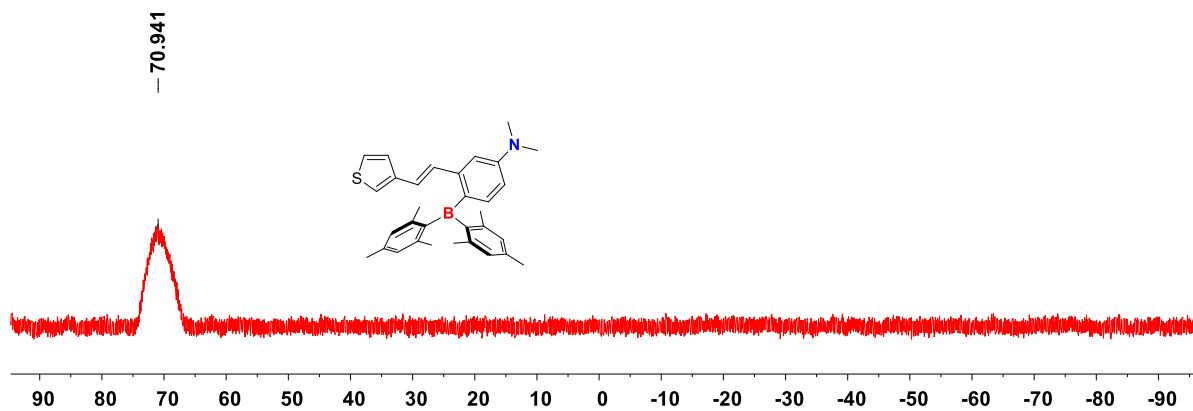

Figure S79.  $^{11}\text{B}$  NMR spectrum of *E*-6a in  $\text{C}_6\text{D}_6$ .

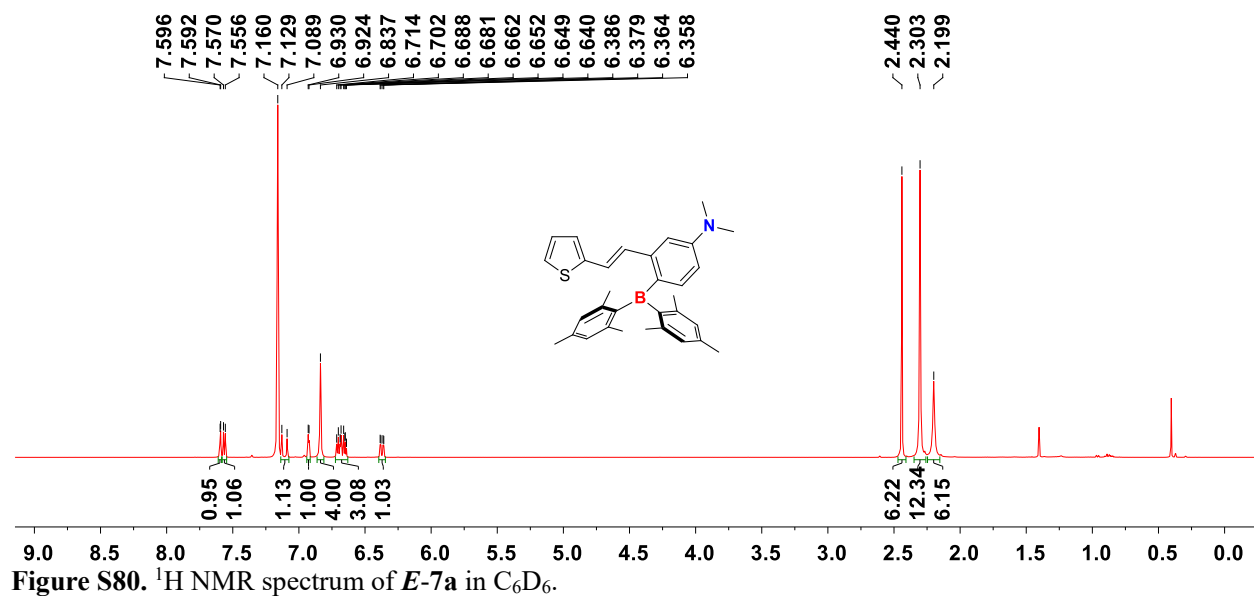

Figure S80.  $^1\text{H}$  NMR spectrum of *E*-7a in  $\text{C}_6\text{D}_6$ .

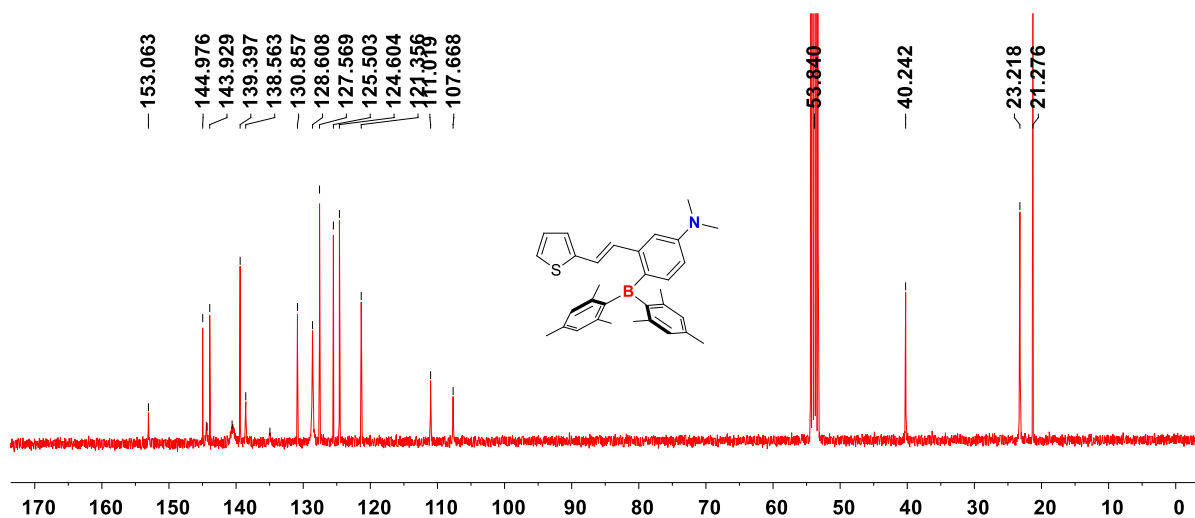

Figure S81.  $^{13}\text{C}$  NMR spectra of *E*-7a in  $\text{CD}_2\text{Cl}_2$ .

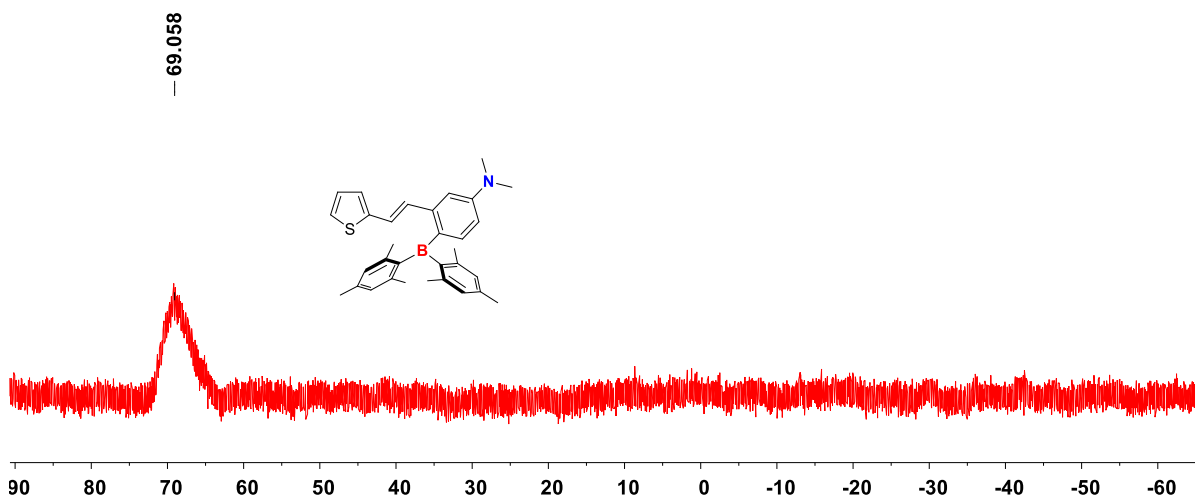

Figure S82.  $^{11}\text{B}$  NMR spectrum of *E*-7a in  $\text{C}_6\text{D}_6$ .



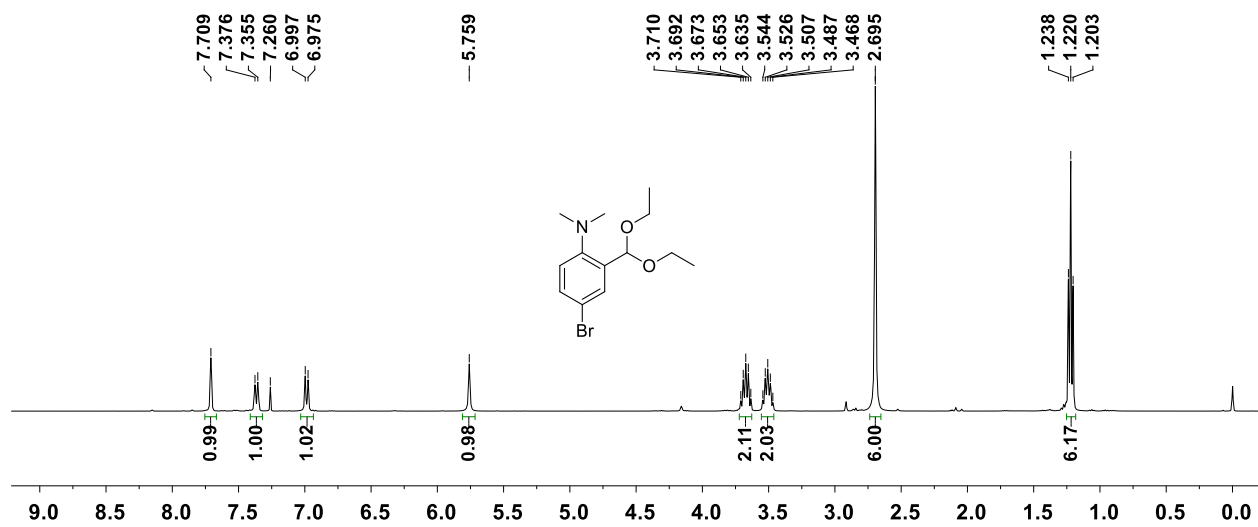

Figure S83.  $^1\text{H}$  NMR spectra of **Pre-BO1'** in  $\text{CDCl}_3$ .

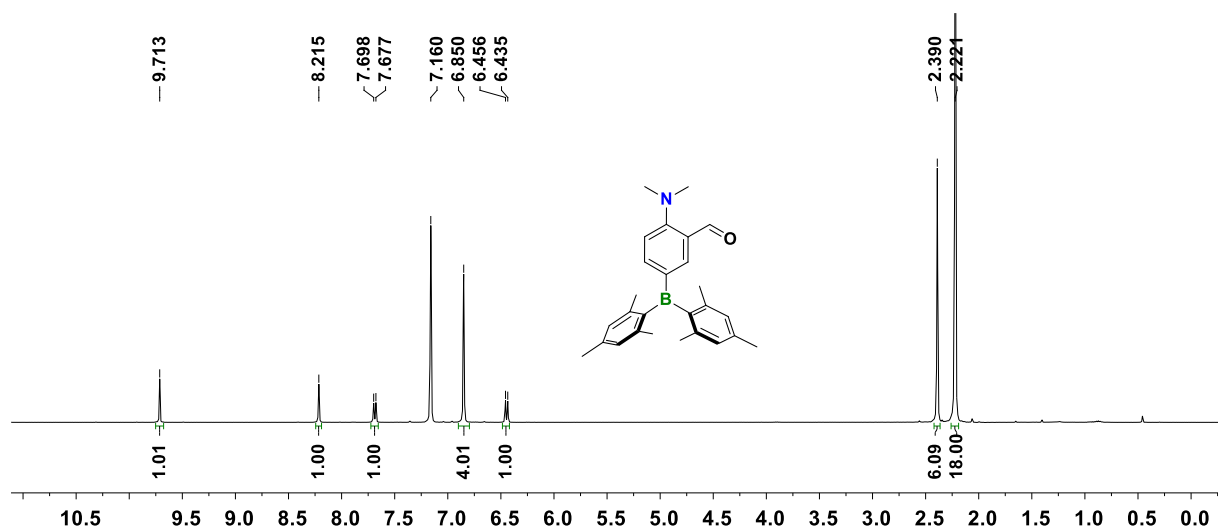

Figure S84.  $^1\text{H}$  NMR spectra of **BO1'** in  $\text{C}_6\text{D}_6$ .

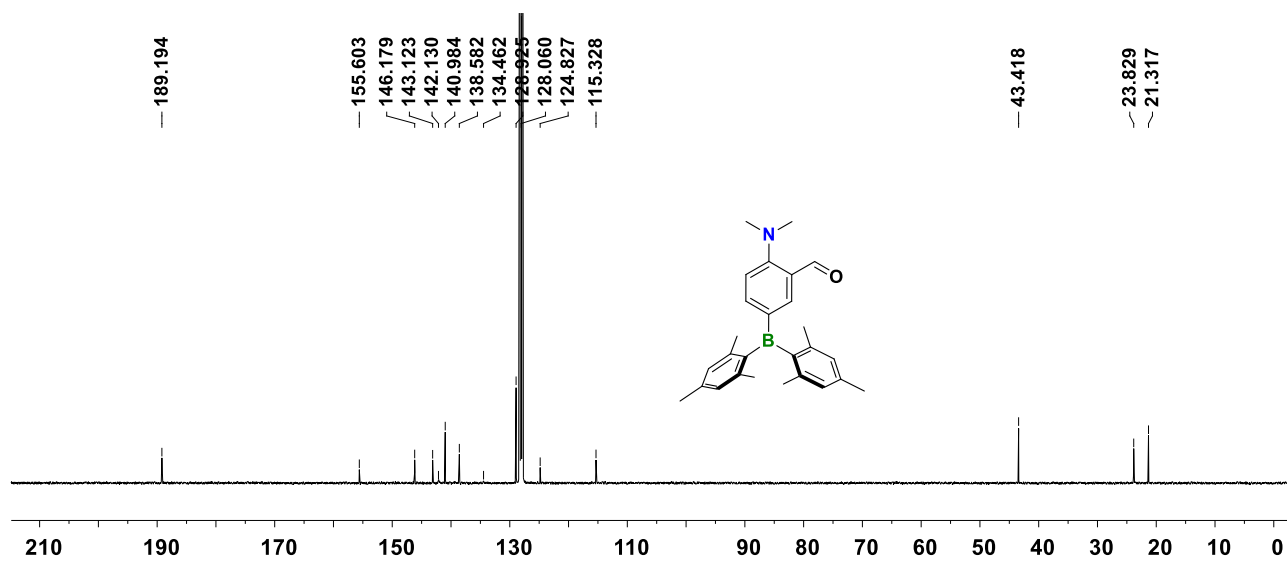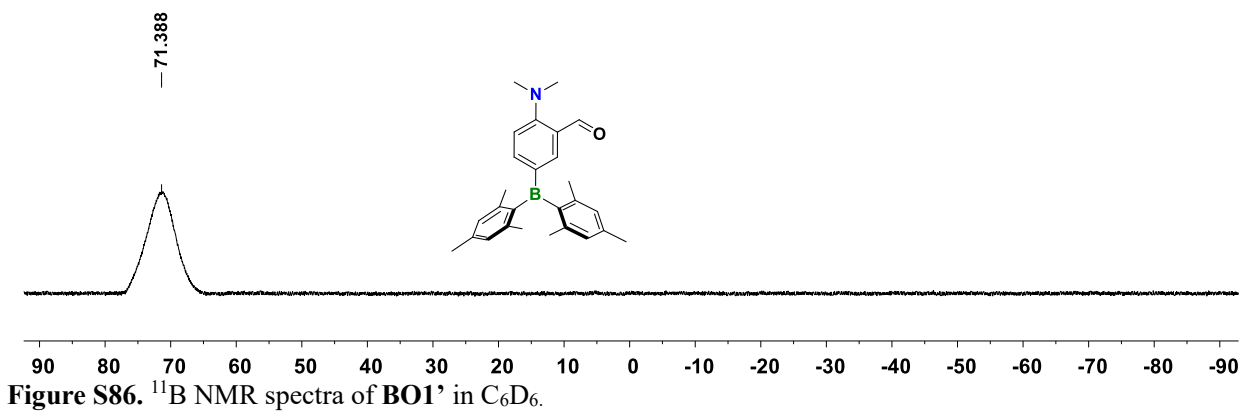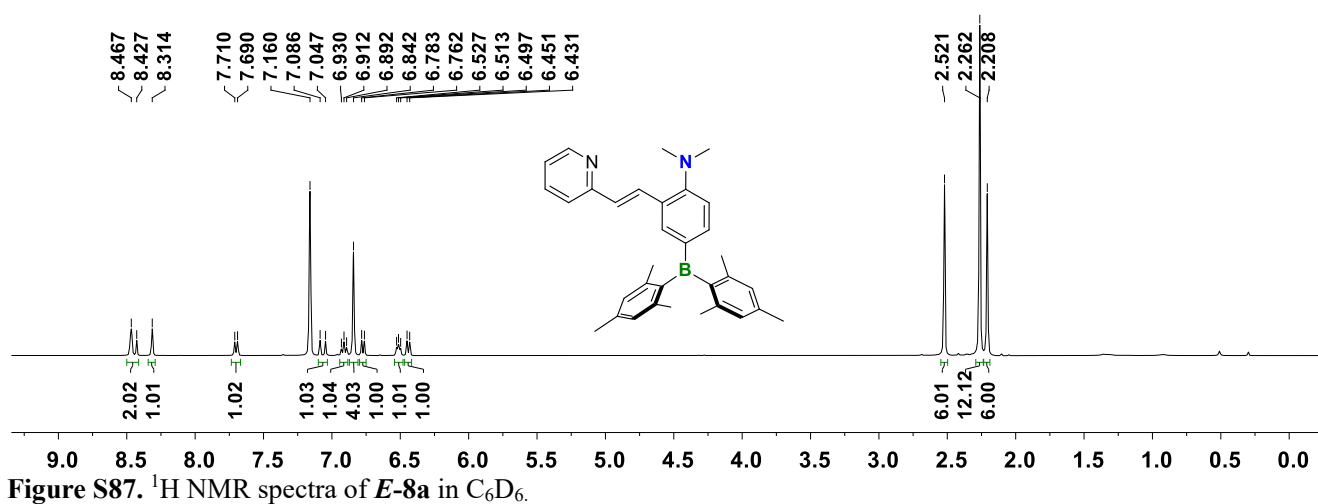

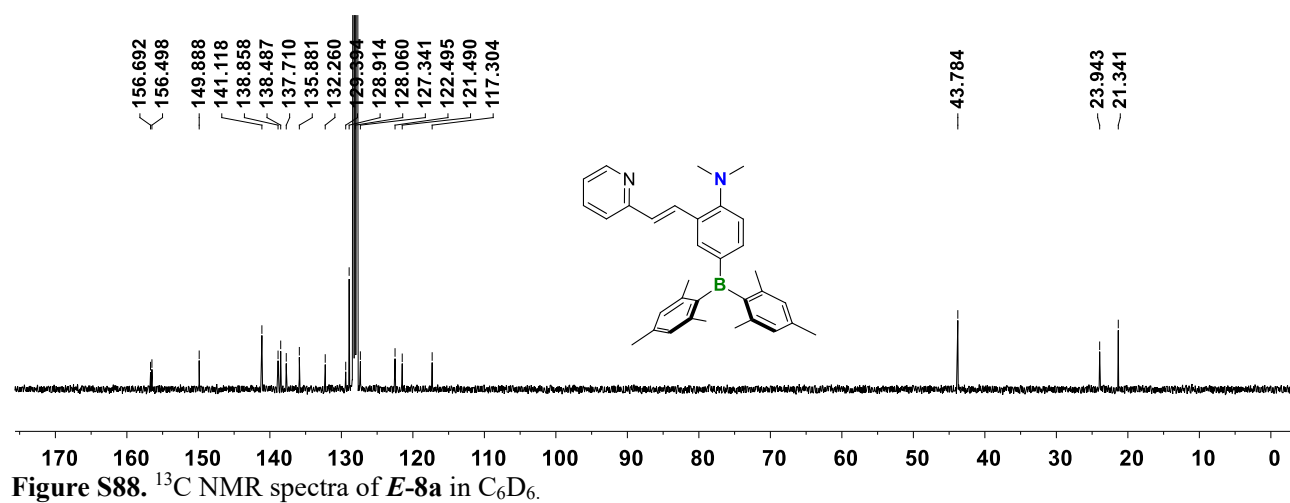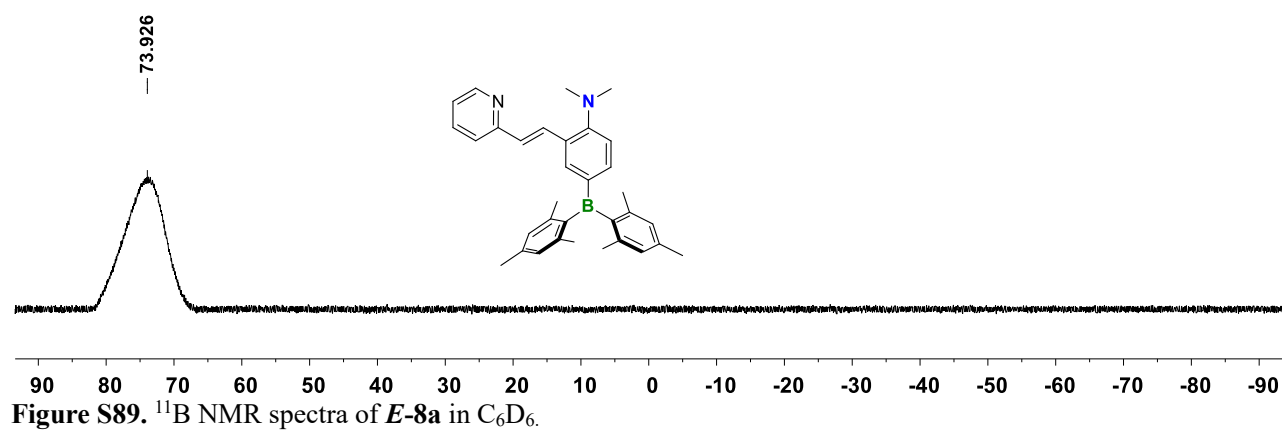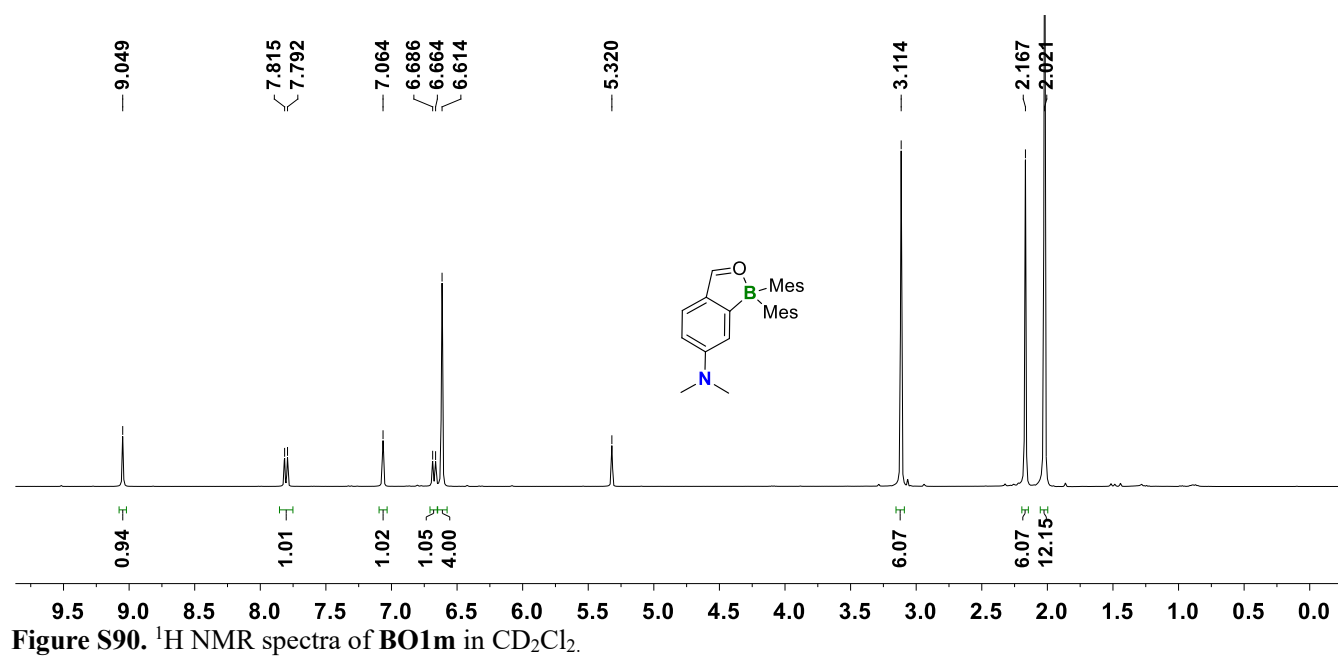

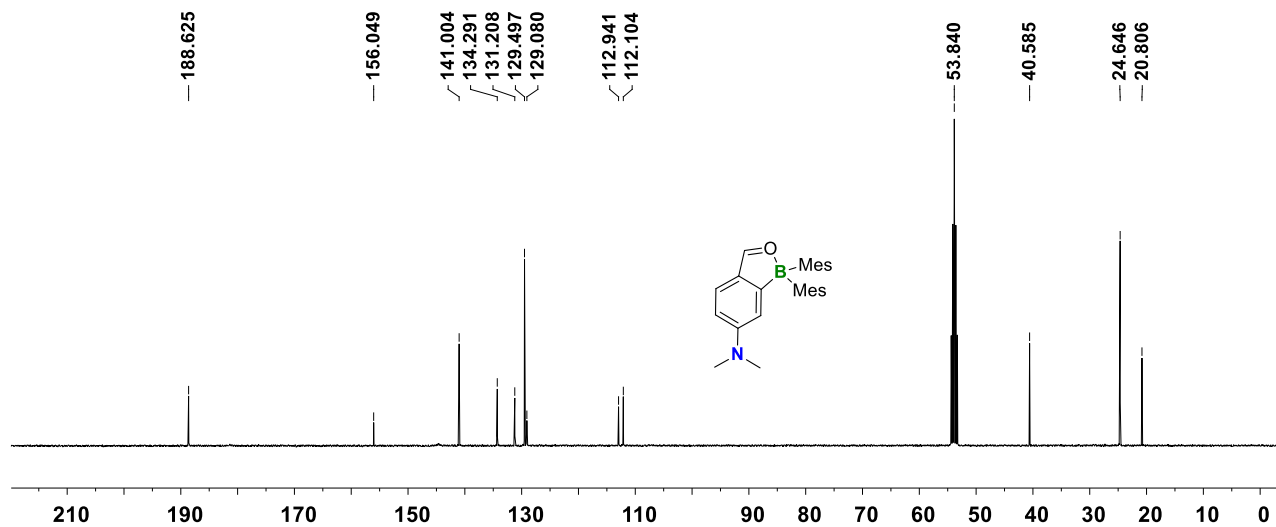

Figure S91.  $^{13}\text{C}$  NMR spectra of **BO1m** in  $\text{CD}_2\text{Cl}_2$ .

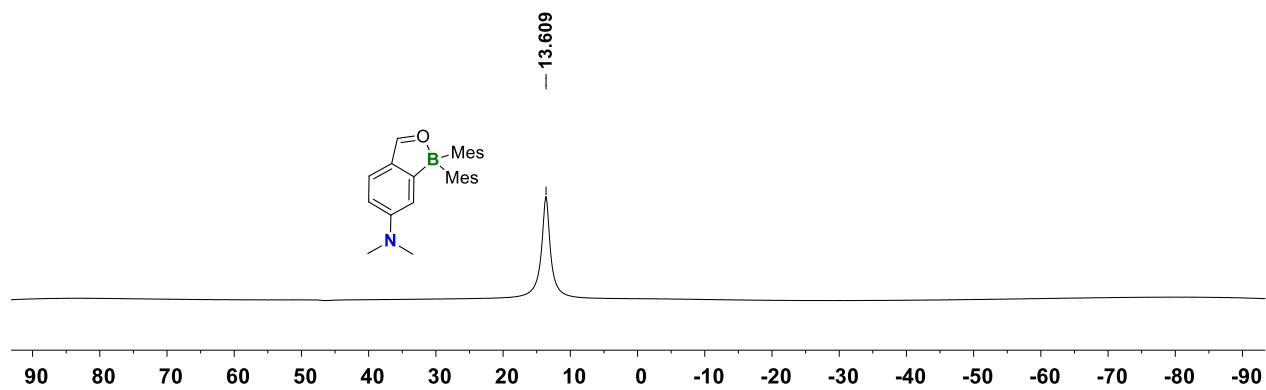

Figure S92.  $^{11}\text{B}$  NMR spectra of **BO1m** in  $\text{CD}_2\text{Cl}_2$ .

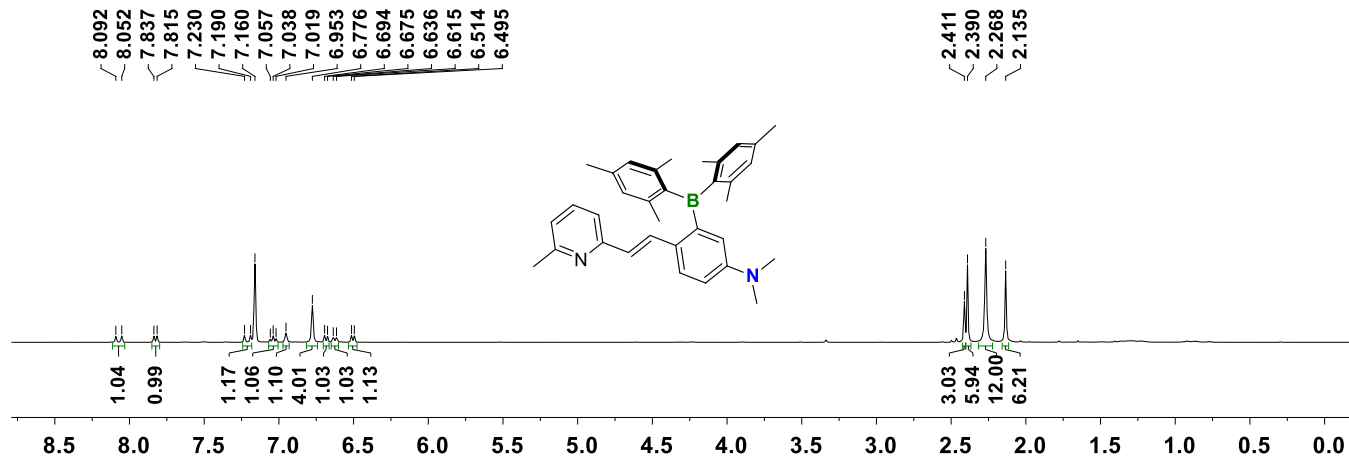

Figure S93.  $^1\text{H}$  NMR spectra of **E-9a** in  $\text{C}_6\text{D}_6$ .

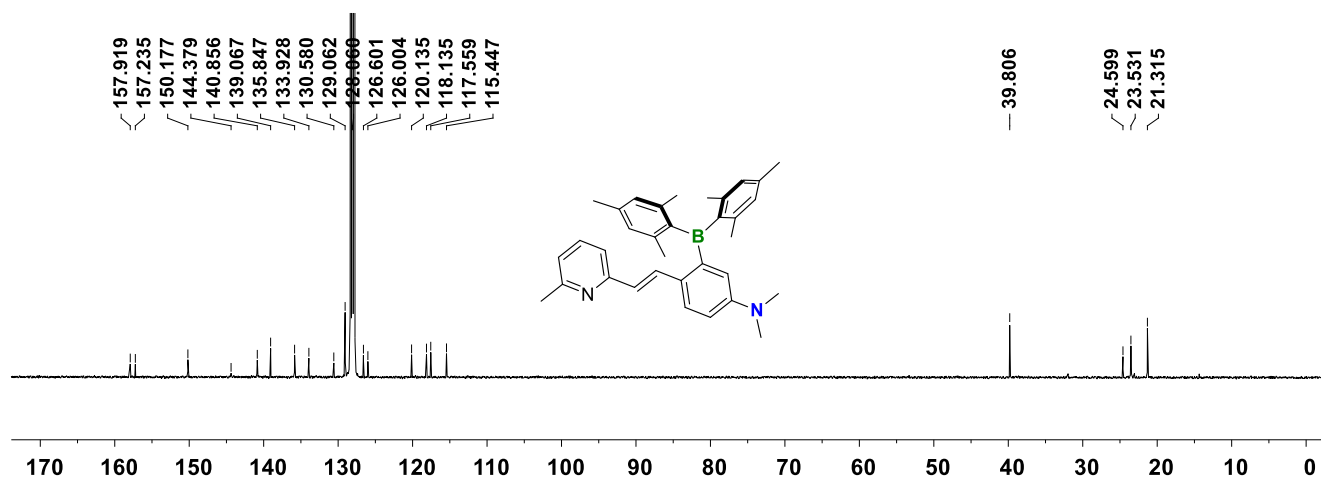

Figure S94.  $^{13}\text{C}$  NMR spectra of *E-9a* in  $\text{C}_6\text{D}_6$ .

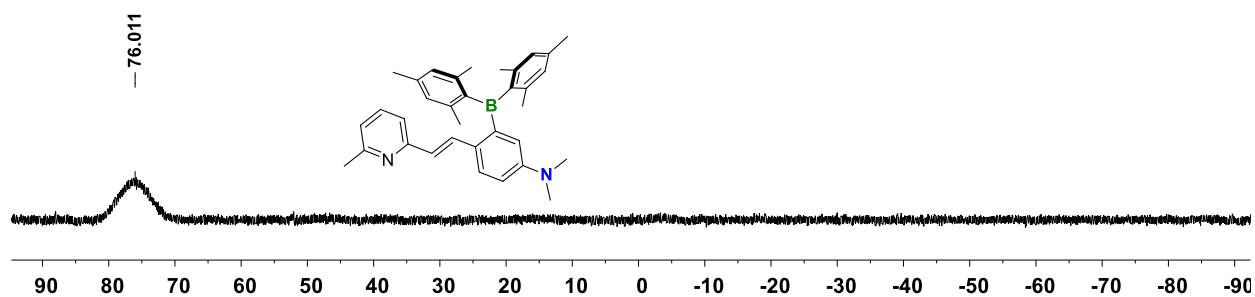

Figure S95.  $^{11}\text{B}$  NMR spectra of *E-9a* in  $\text{C}_6\text{D}_6$ .

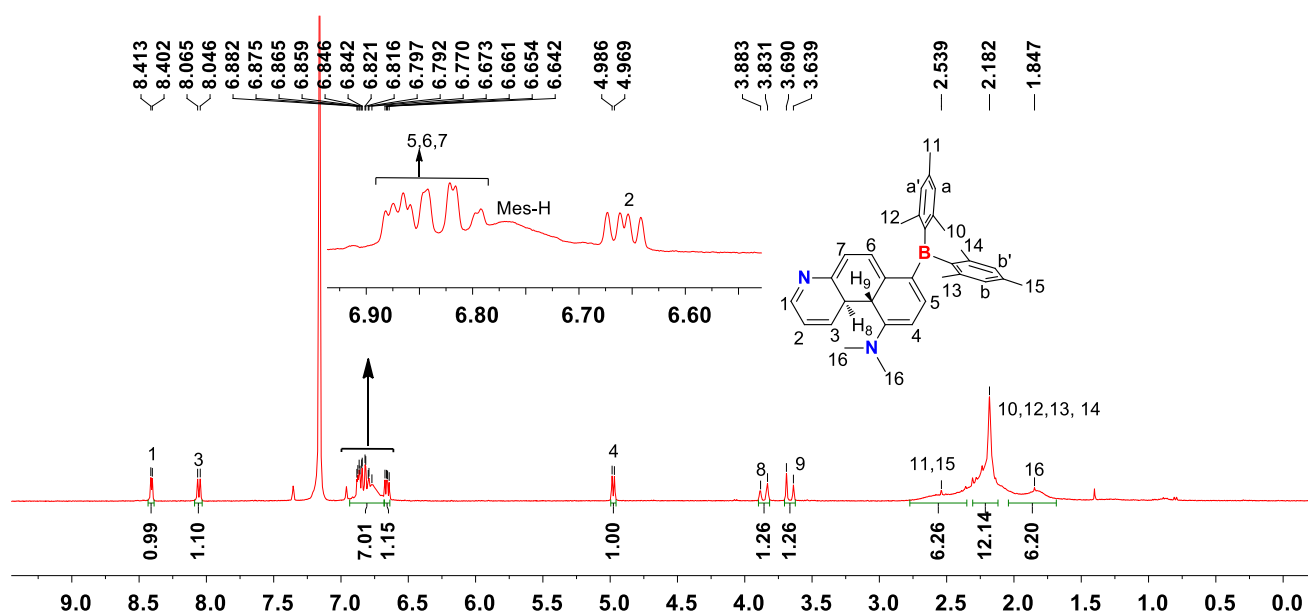

Figure S96.  $^1\text{H}$  NMR spectra of **1b** in  $\text{C}_6\text{D}_6$ .

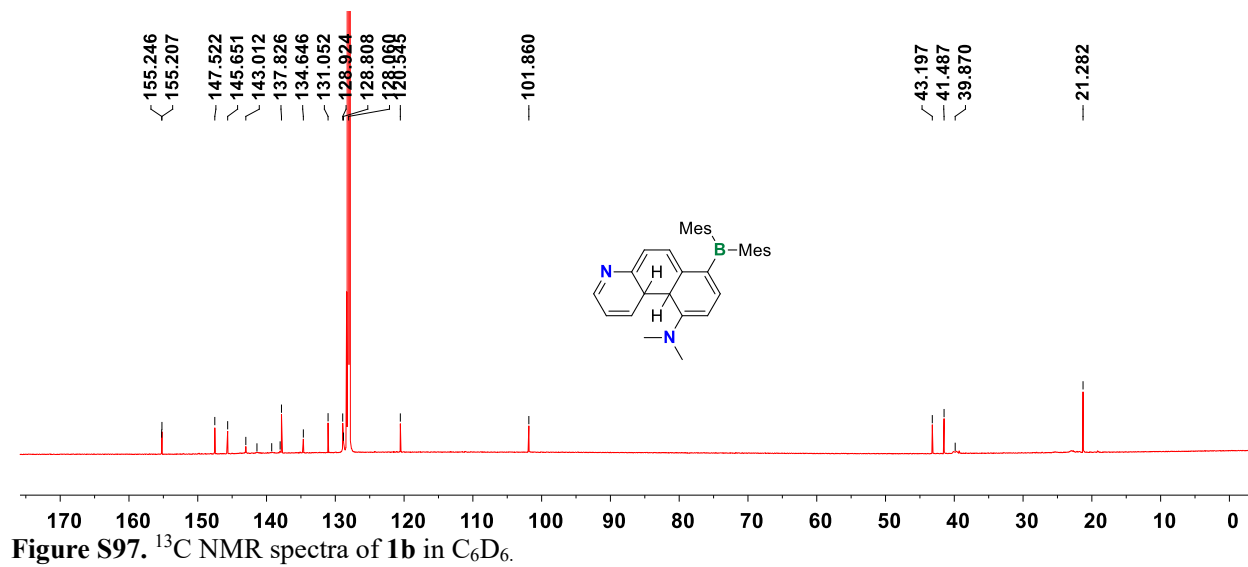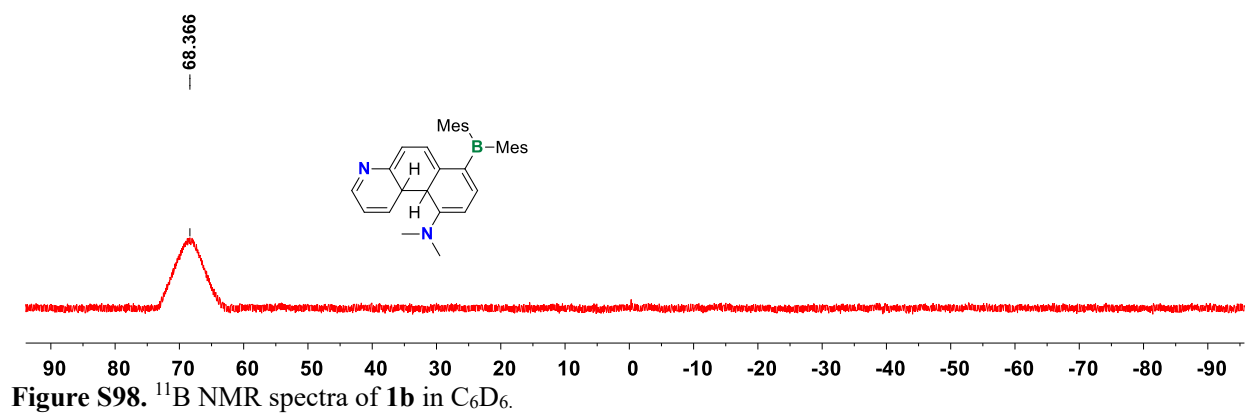

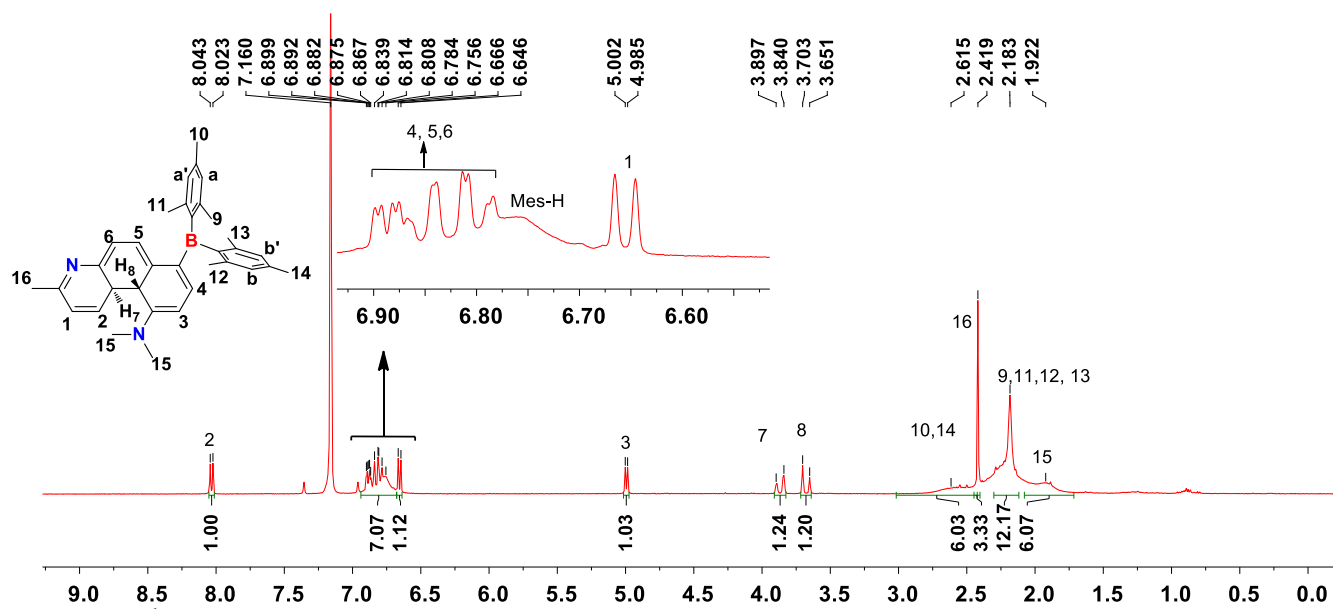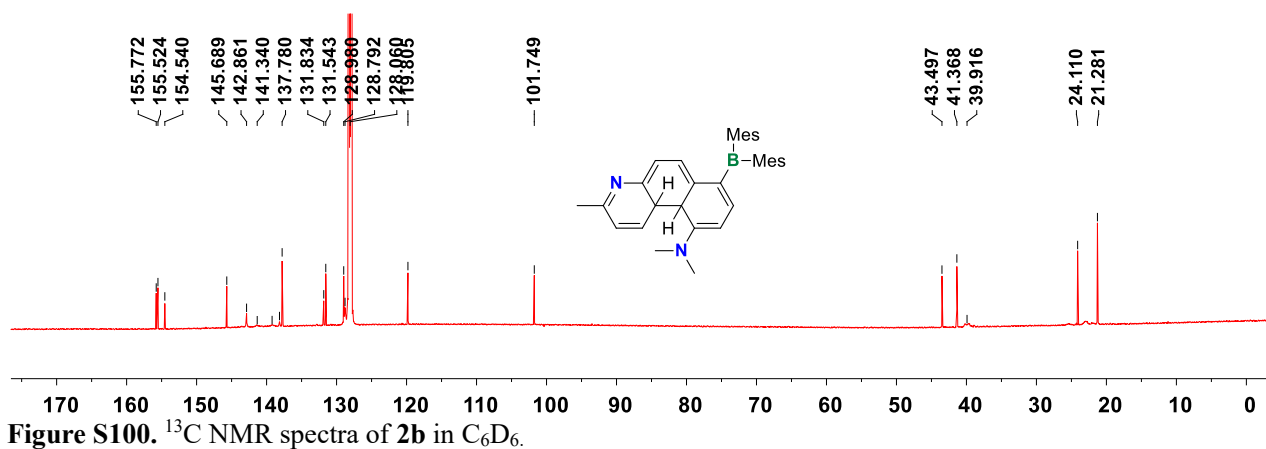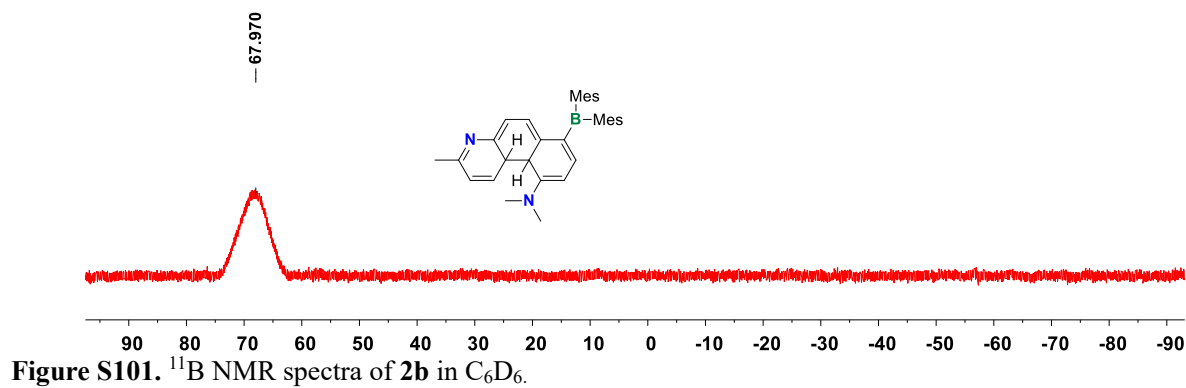

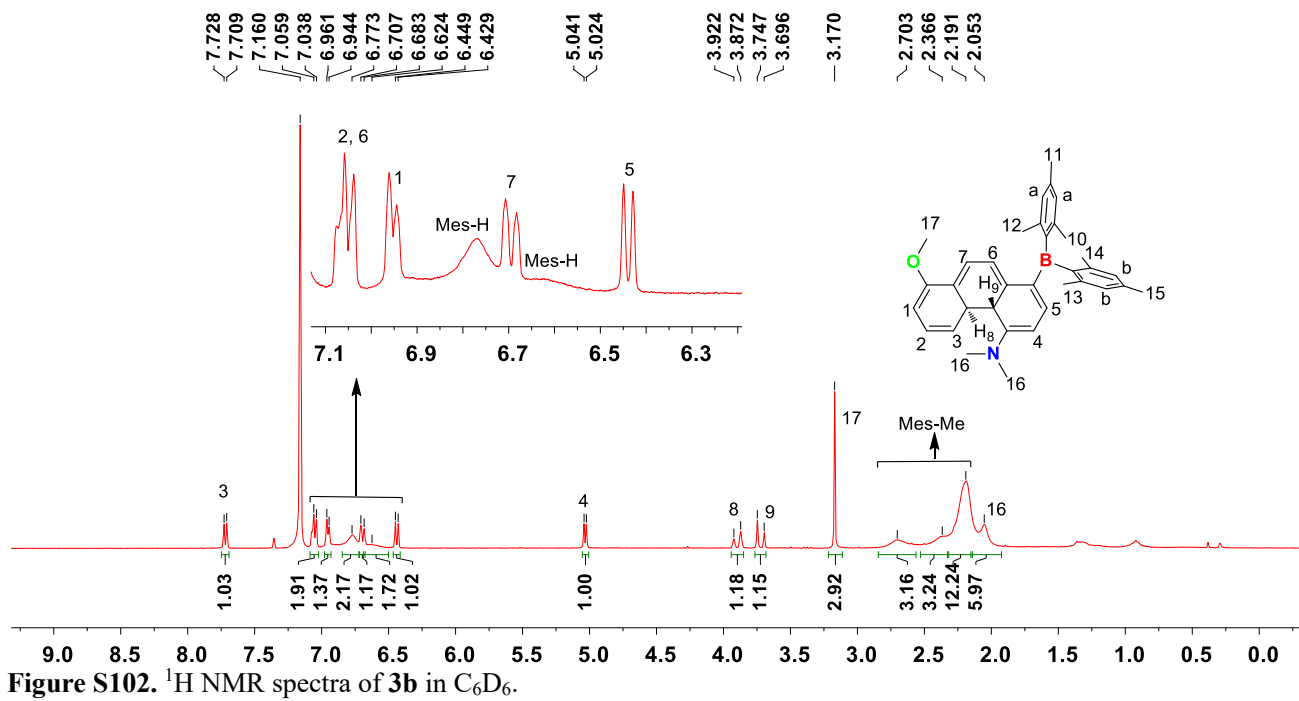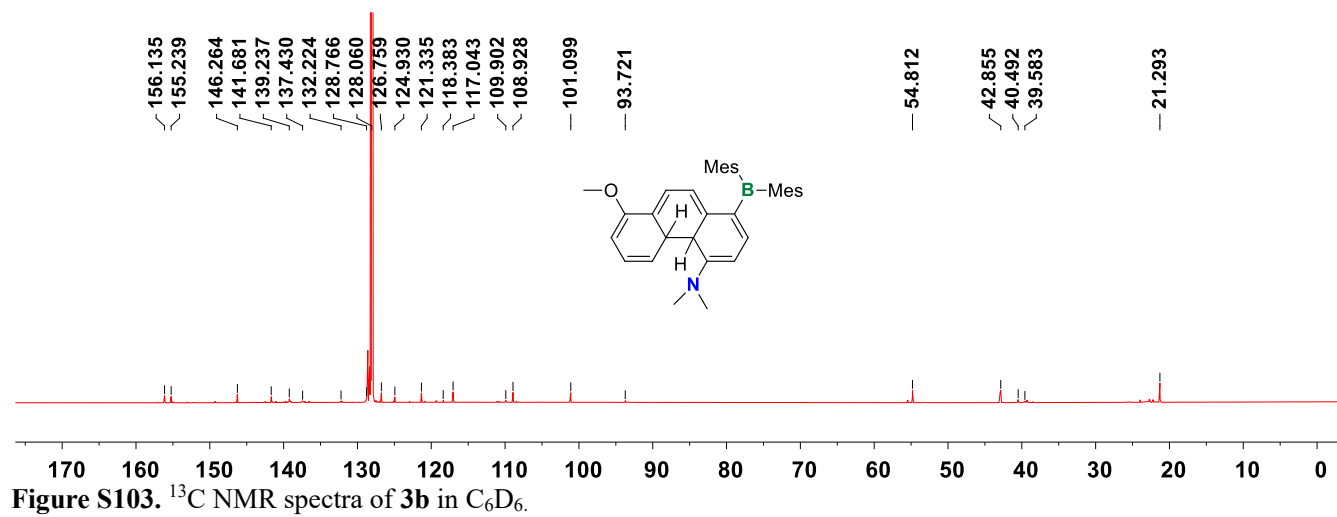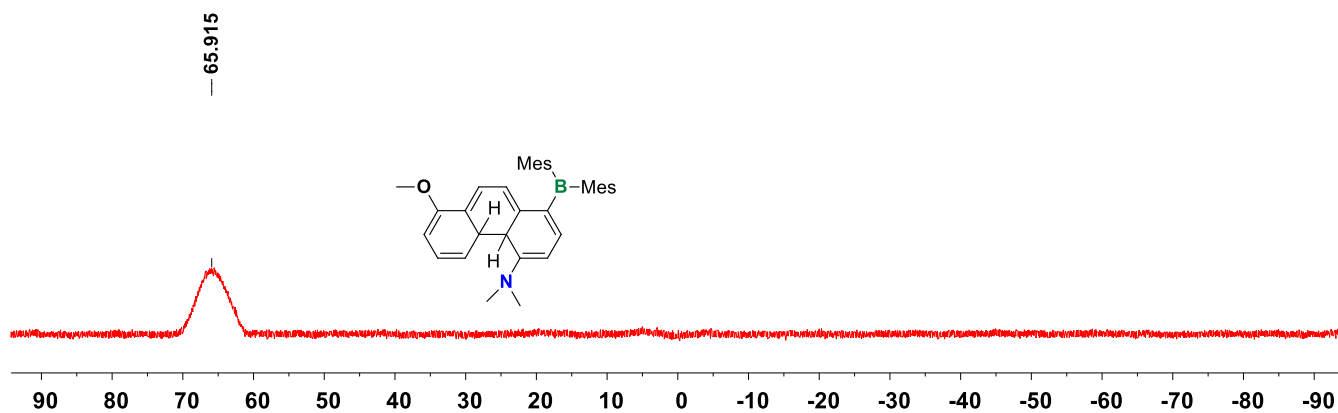



Figure S104.  $^{11}\text{B}$  NMR spectra of **3b** in  $\text{C}_6\text{D}_6$ .

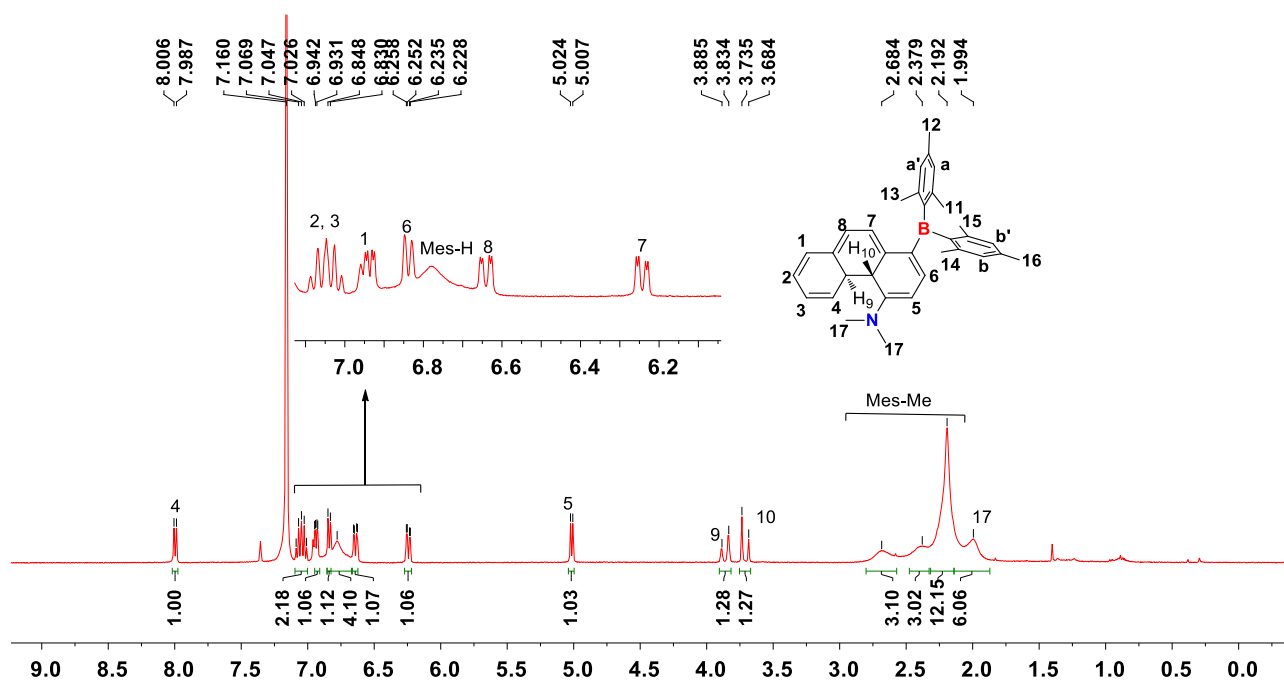

Figure S105.  $^1\text{H}$  NMR spectra of **4b** in  $\text{C}_6\text{D}_6$ .

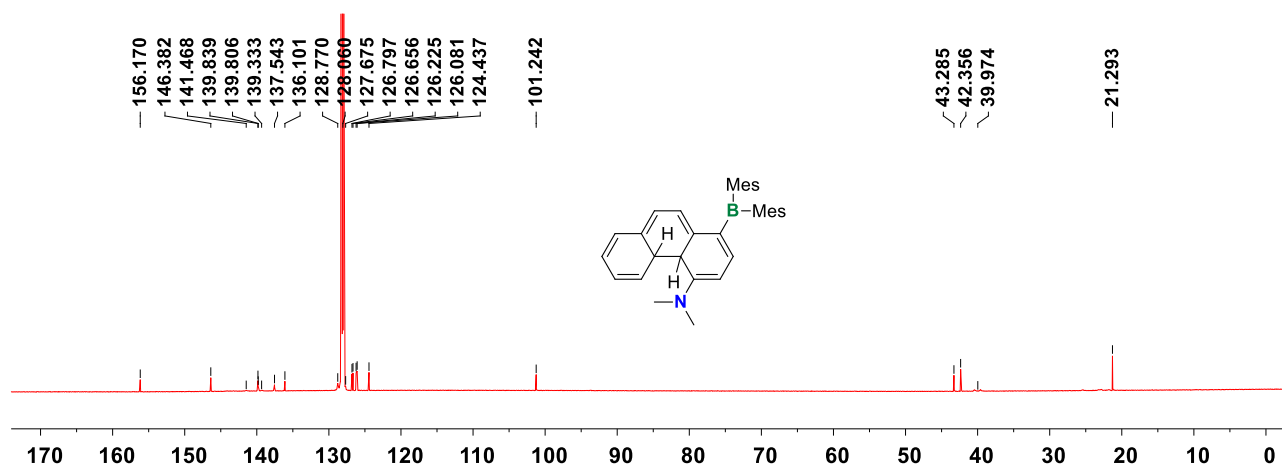

Figure S106.  $^{13}\text{C}$  NMR spectra of **4b** in  $\text{C}_6\text{D}_6$ .

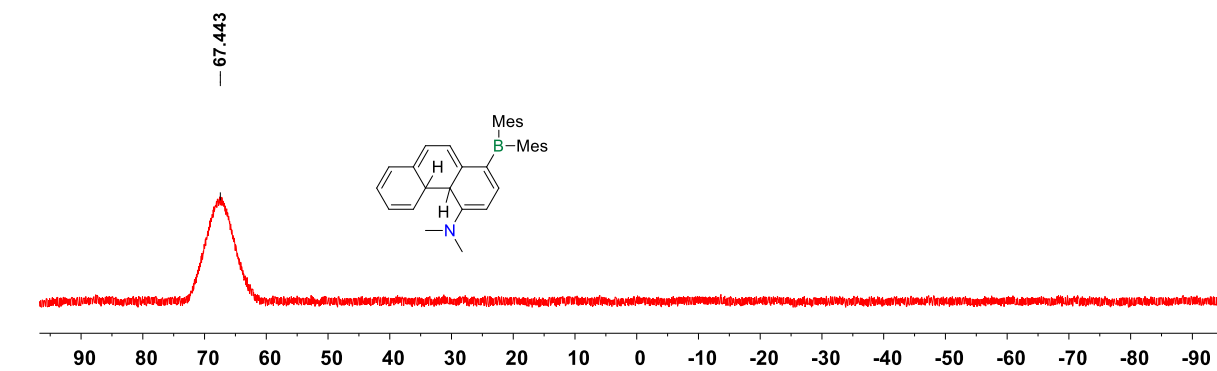

Figure S107.  $^{11}\text{B}$  NMR spectra of **4b** in  $\text{C}_6\text{D}_6$ .

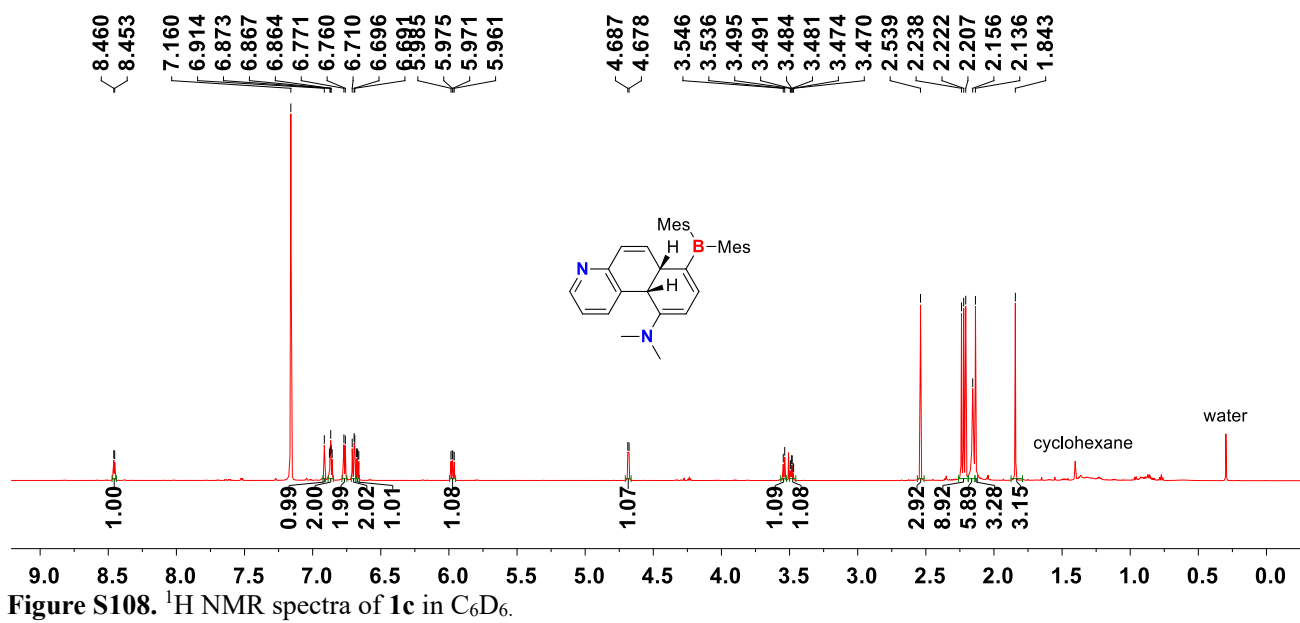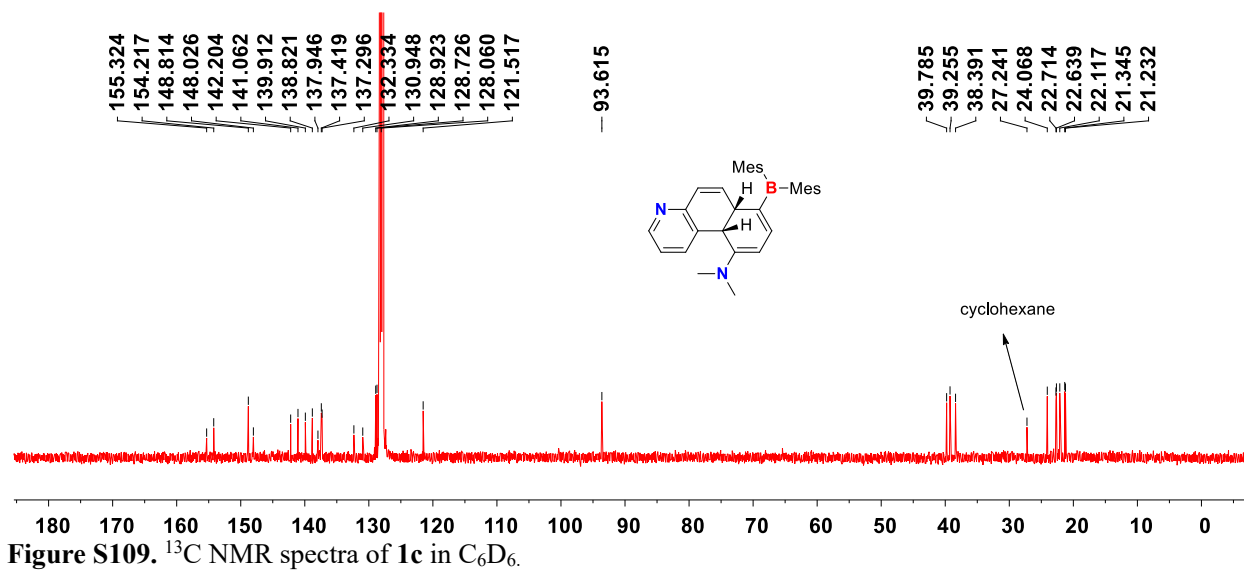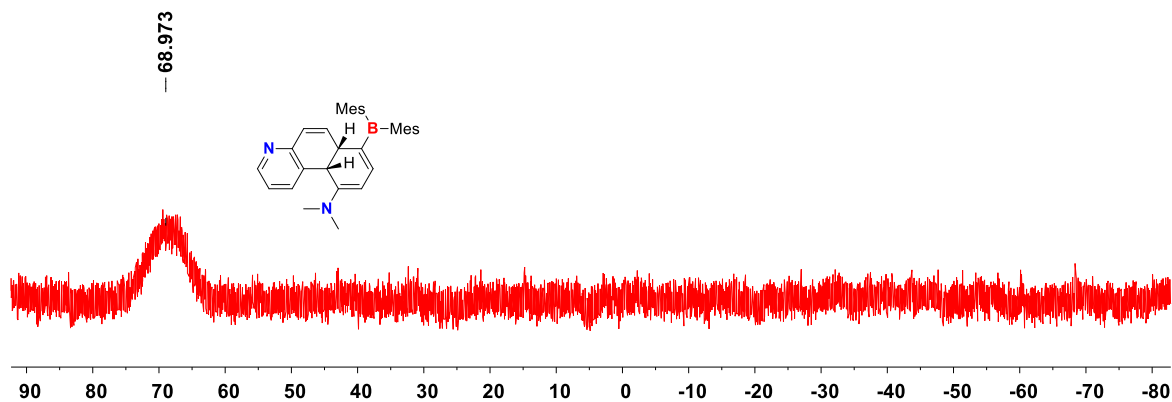

Figure S110.  $^{11}\text{B}$  NMR spectra of **1c** in  $\text{C}_6\text{D}_6$ .

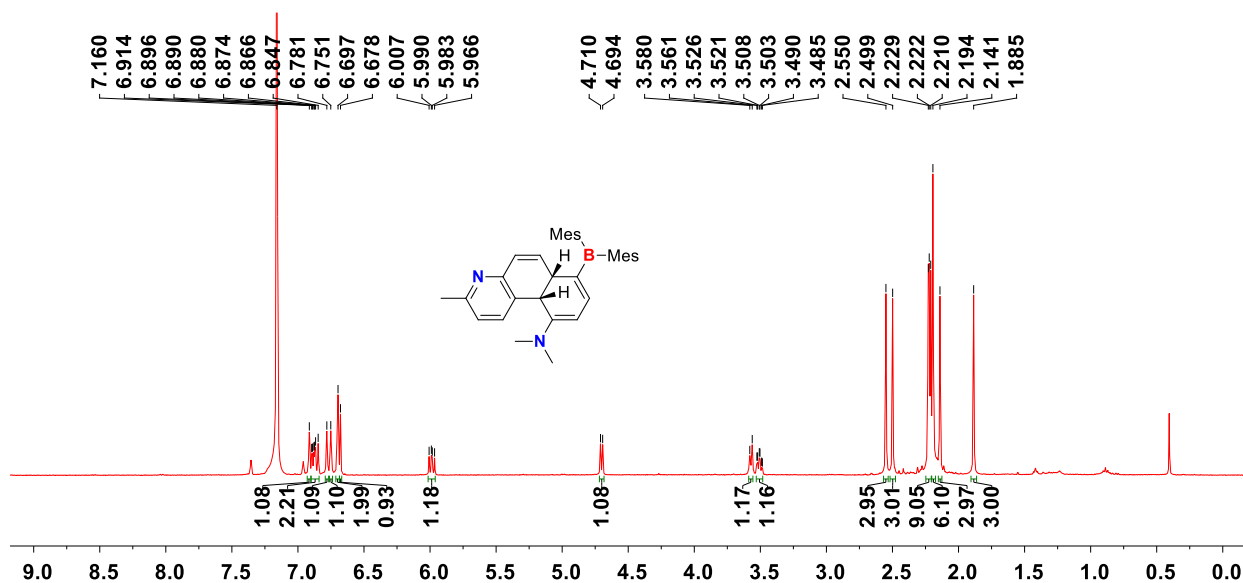

Figure S111.  $^1\text{H}$  NMR spectra of **2c** in  $\text{C}_6\text{D}_6$ .

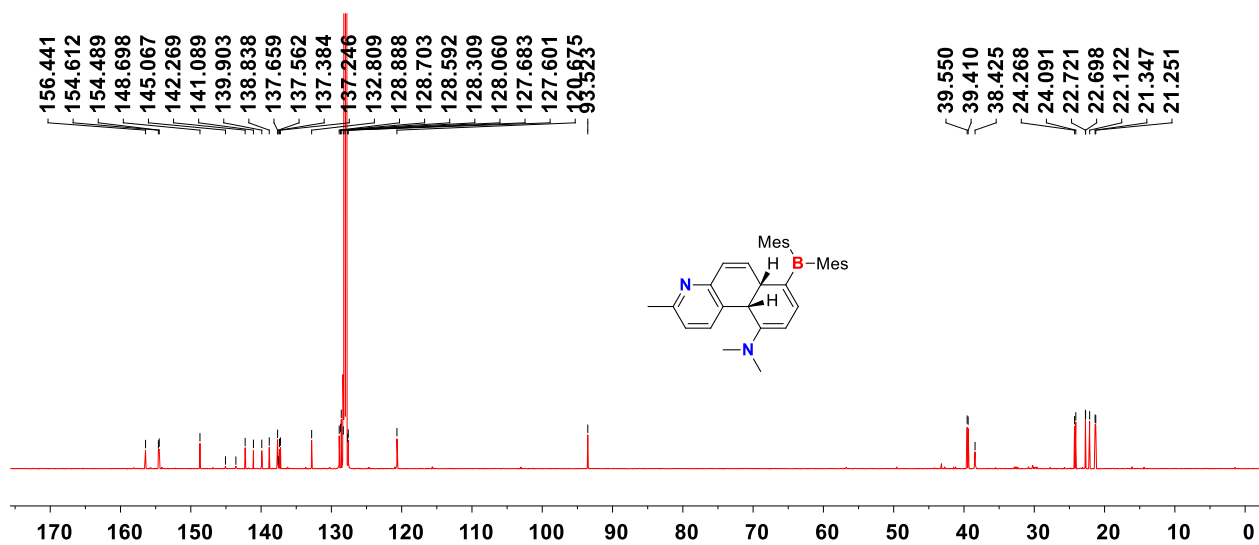

Figure S112.  $^{13}\text{C}$  NMR spectra of **2c** in  $\text{C}_6\text{D}_6$ .

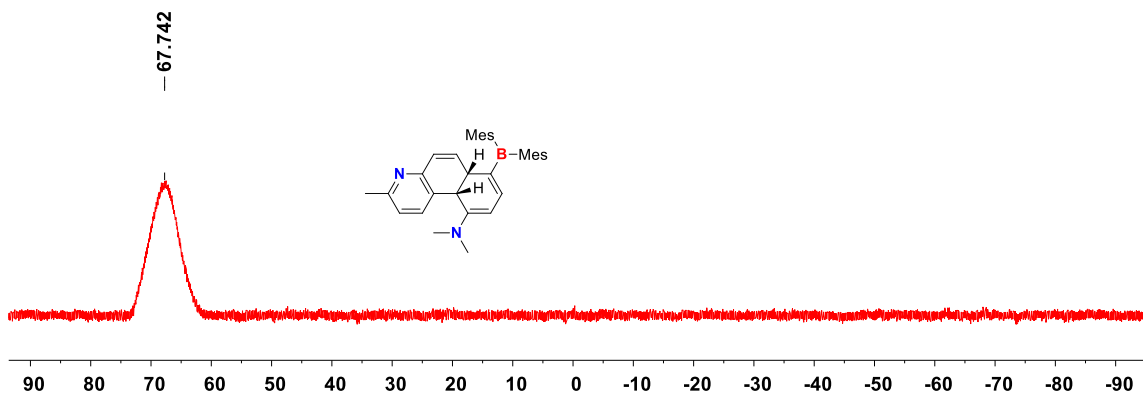

Figure S113.  $^{11}\text{B}$  NMR spectra of 2c in  $\text{C}_6\text{D}_6$ .

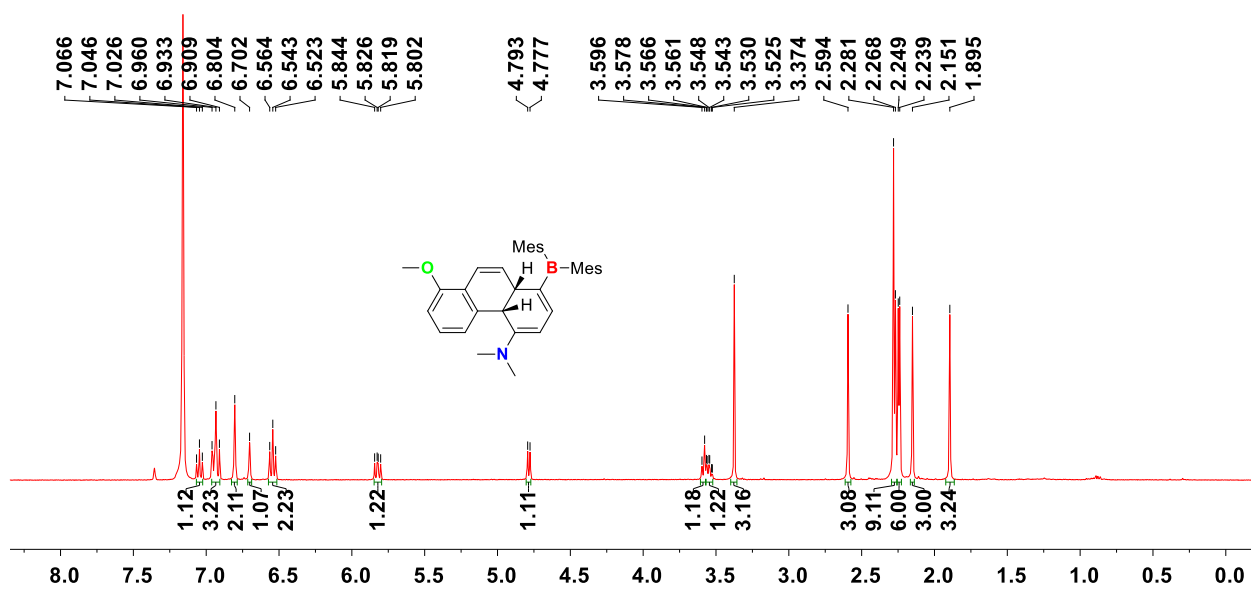

Figure S114.  $^1\text{H}$  NMR spectra of 3c in  $\text{C}_6\text{D}_6$ .

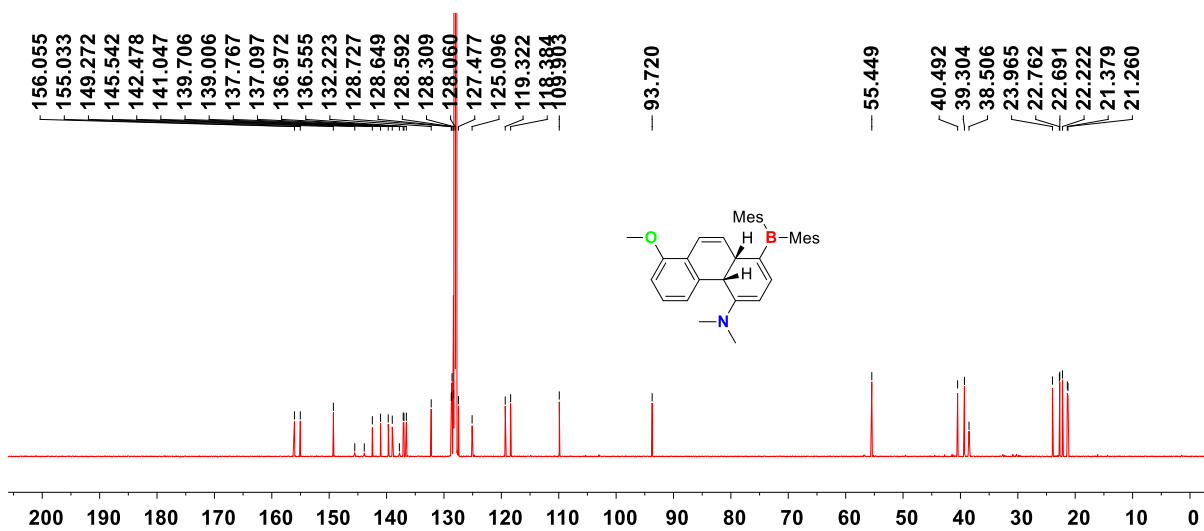

Figure S115.  $^{13}\text{C}$  NMR spectra of 3c in  $\text{C}_6\text{D}_6$ .

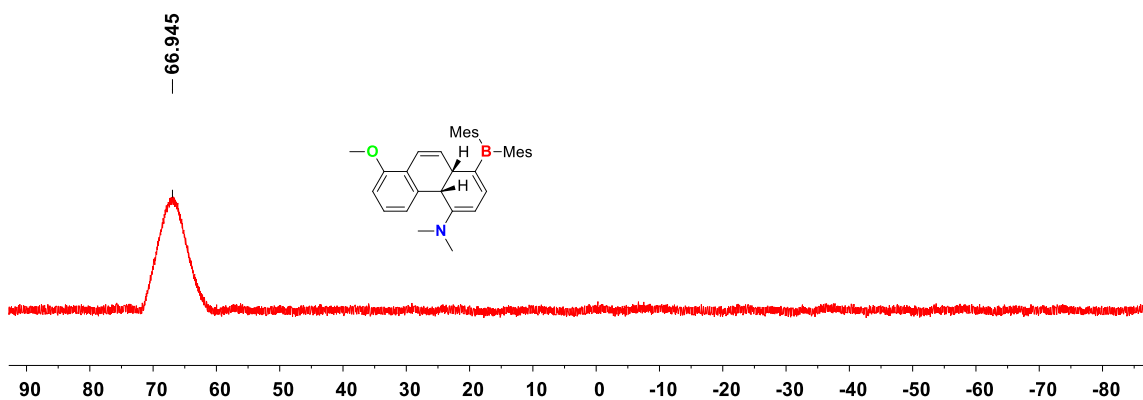

Figure S116.  $^{11}\text{B}$  NMR spectra of **3c** in  $\text{C}_6\text{D}_6$ .

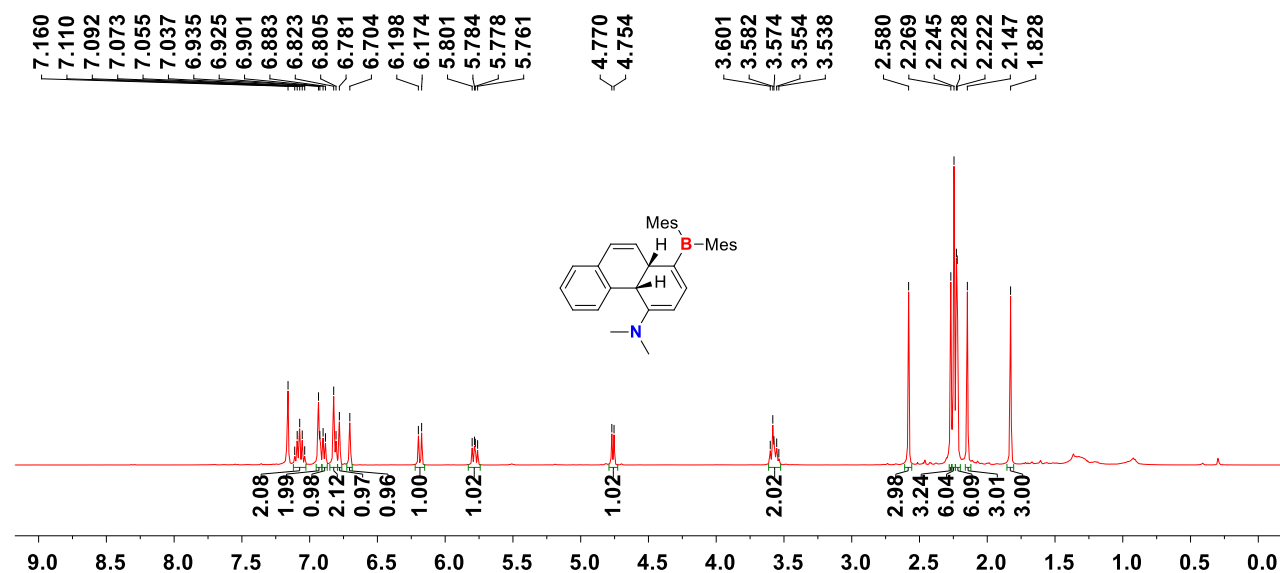

Figure S117.  $^1\text{H}$  NMR spectra of **4c** in  $\text{C}_6\text{D}_6$ .

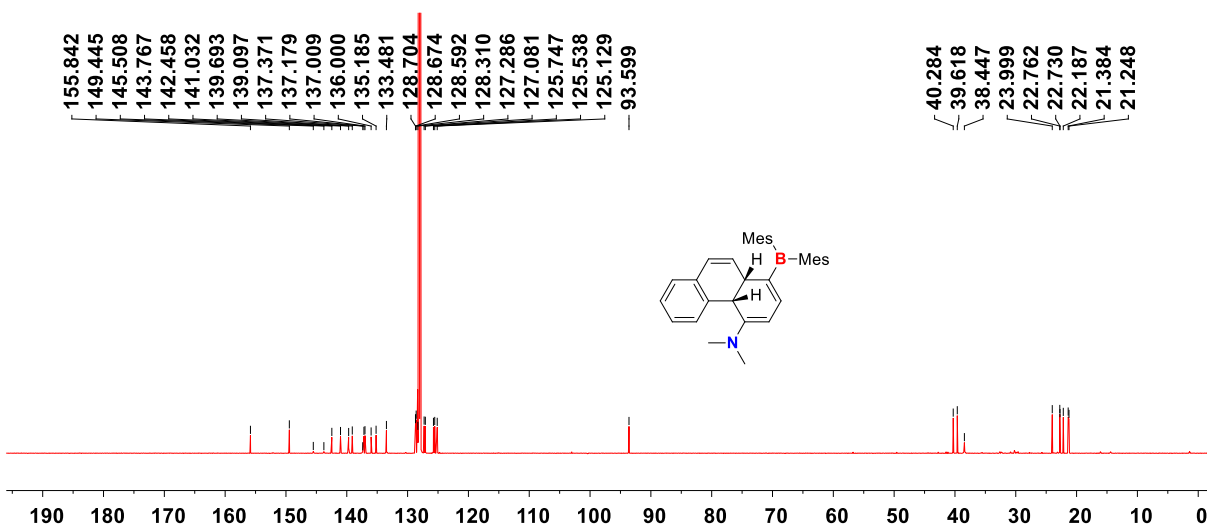

Figure S118.  $^{13}\text{C}$  NMR spectra of **4c** in  $\text{C}_6\text{D}_6$ .

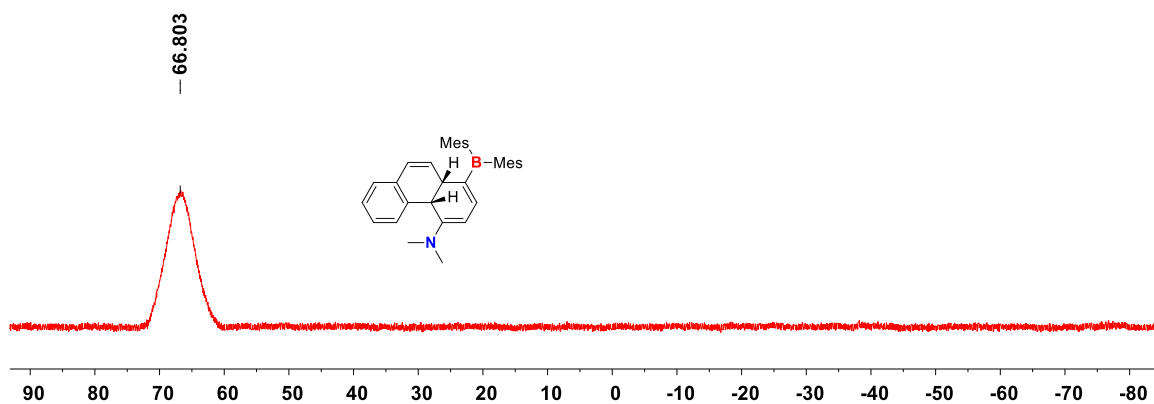

Figure S119.  $^{11}\text{B}$  NMR spectra of **4c** in  $\text{C}_6\text{D}_6$ .

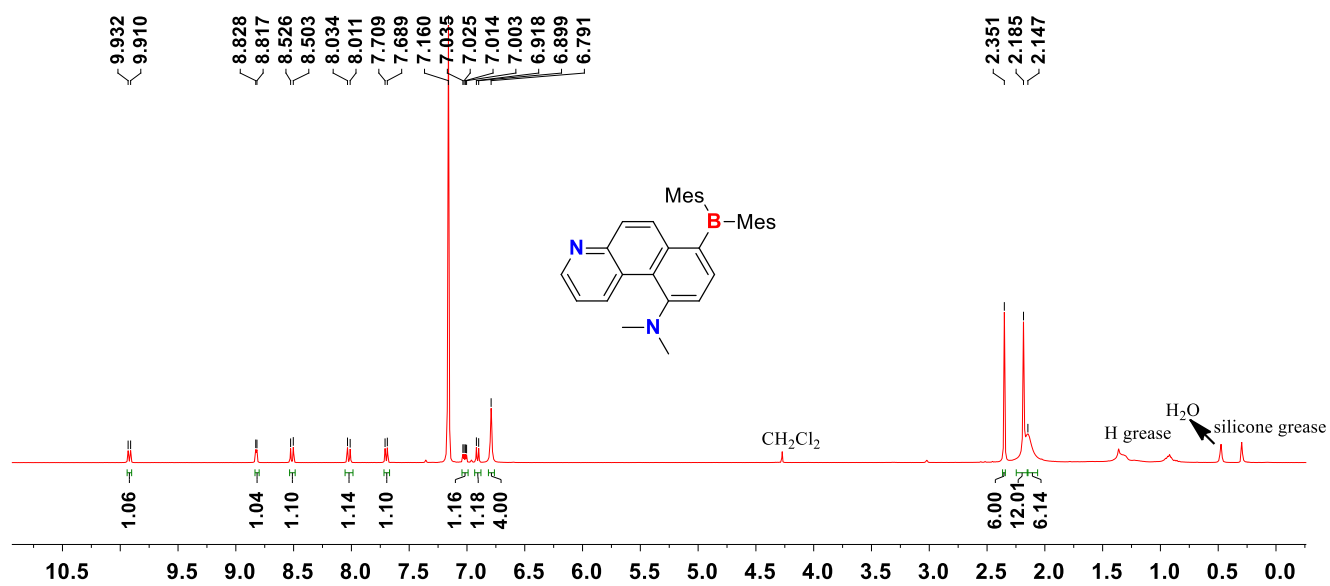

Figure S120.  $^1\text{H}$  NMR spectra of **1d** in  $\text{C}_6\text{D}_6$ .

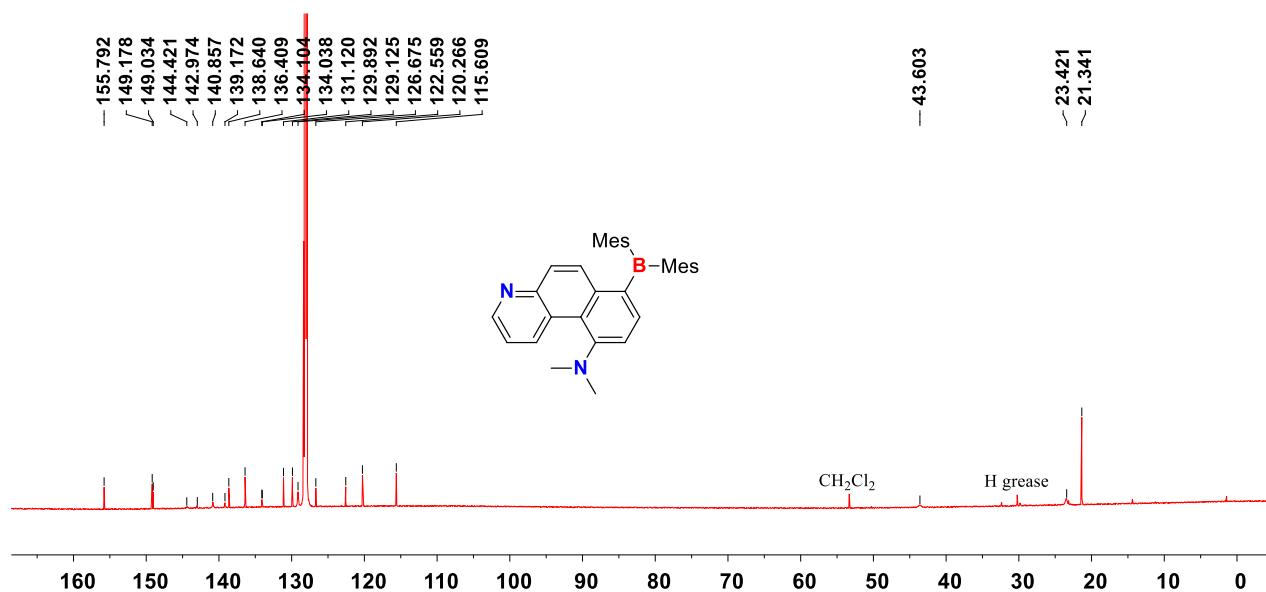

Figure S121.  $^{13}\text{C}$  NMR spectra of **1d** in  $\text{C}_6\text{D}_6$ .

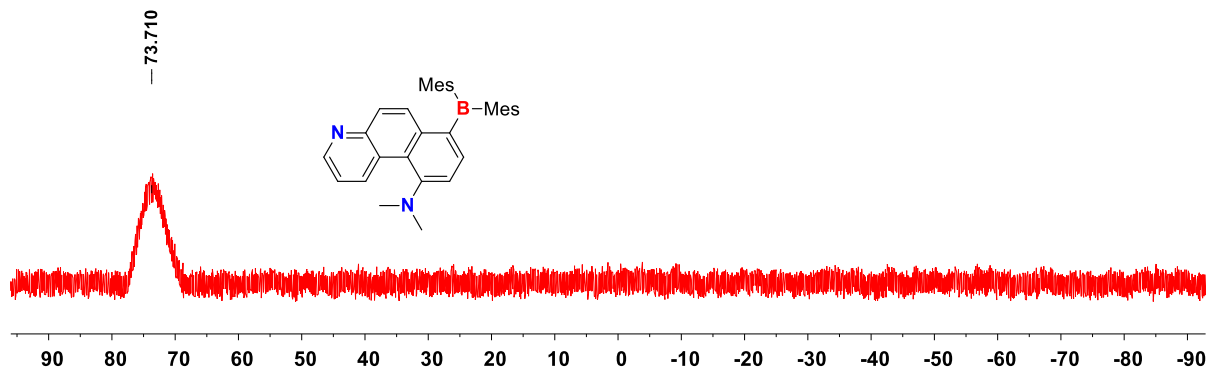

Figure S122.  $^{11}\text{B}$  NMR spectra of **1d** in  $\text{C}_6\text{D}_6$ .

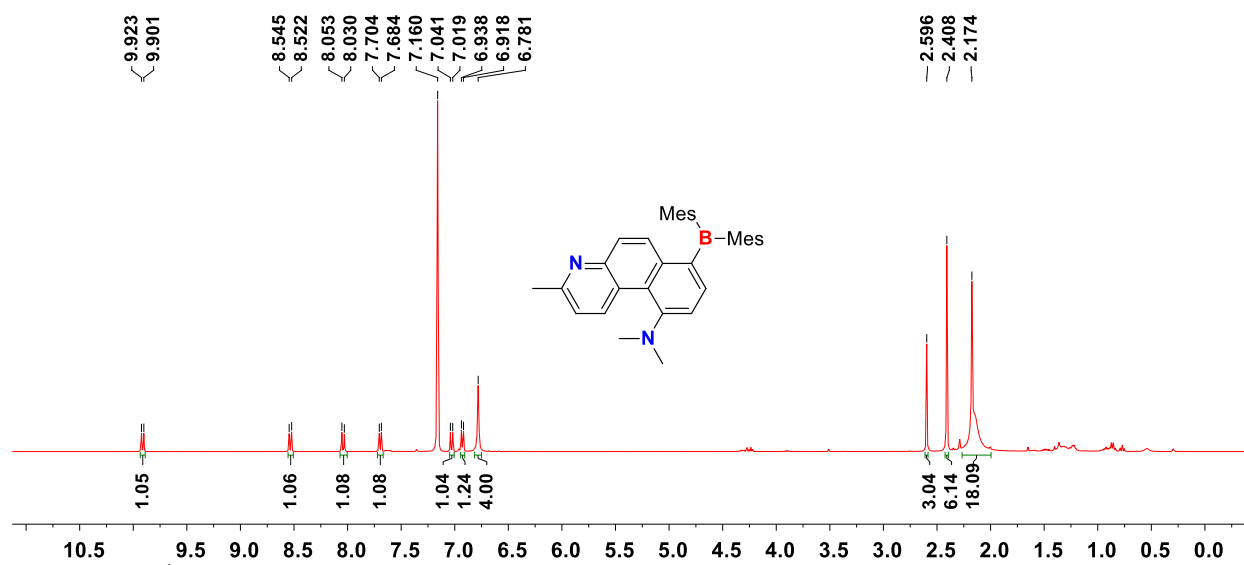

Figure S123.  $^1\text{H}$  NMR spectra of **2d** in  $\text{C}_6\text{D}_6$ .

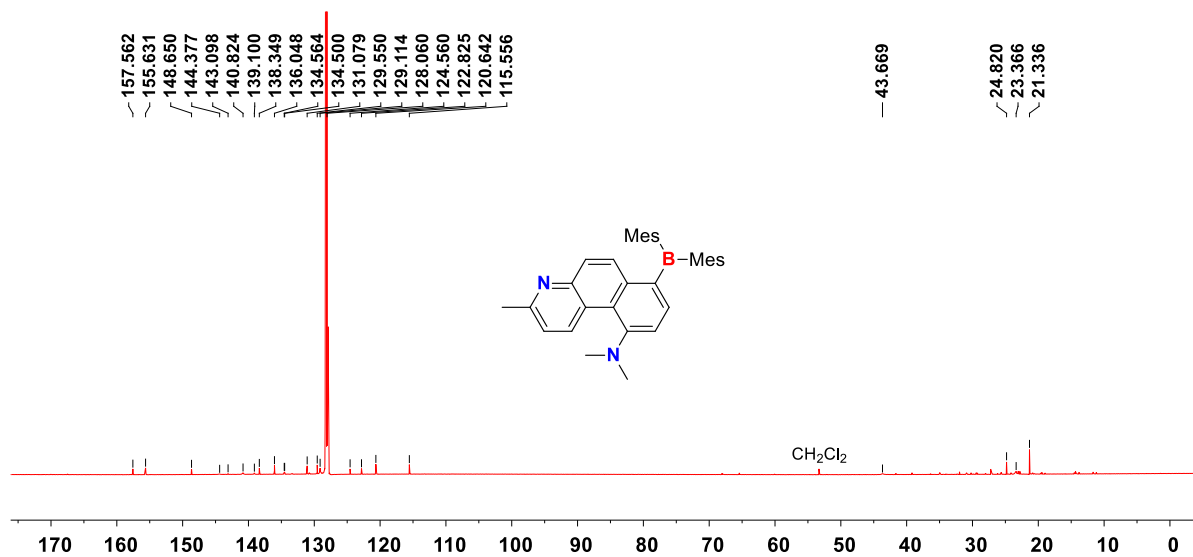

Figure S124.  $^{13}\text{C}$  NMR spectra of **2d** in  $\text{C}_6\text{D}_6$ .

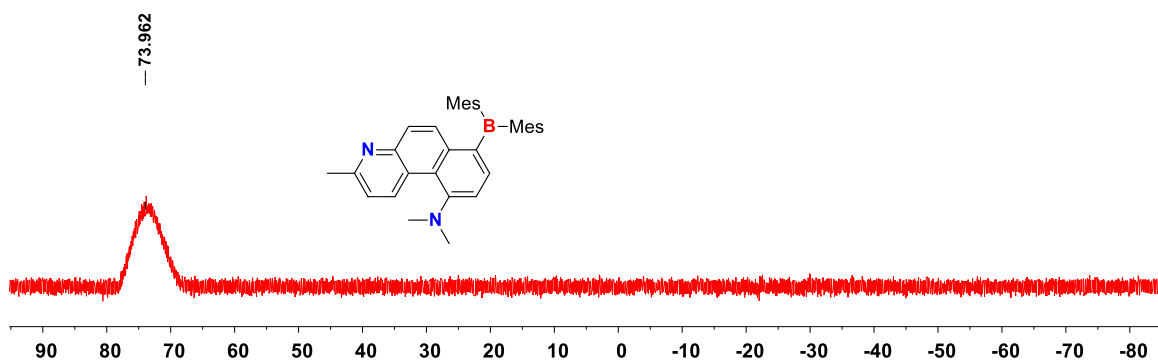

Figure S125.  $^{11}\text{B}$  NMR spectra of **2d** in  $\text{C}_6\text{D}_6$ .

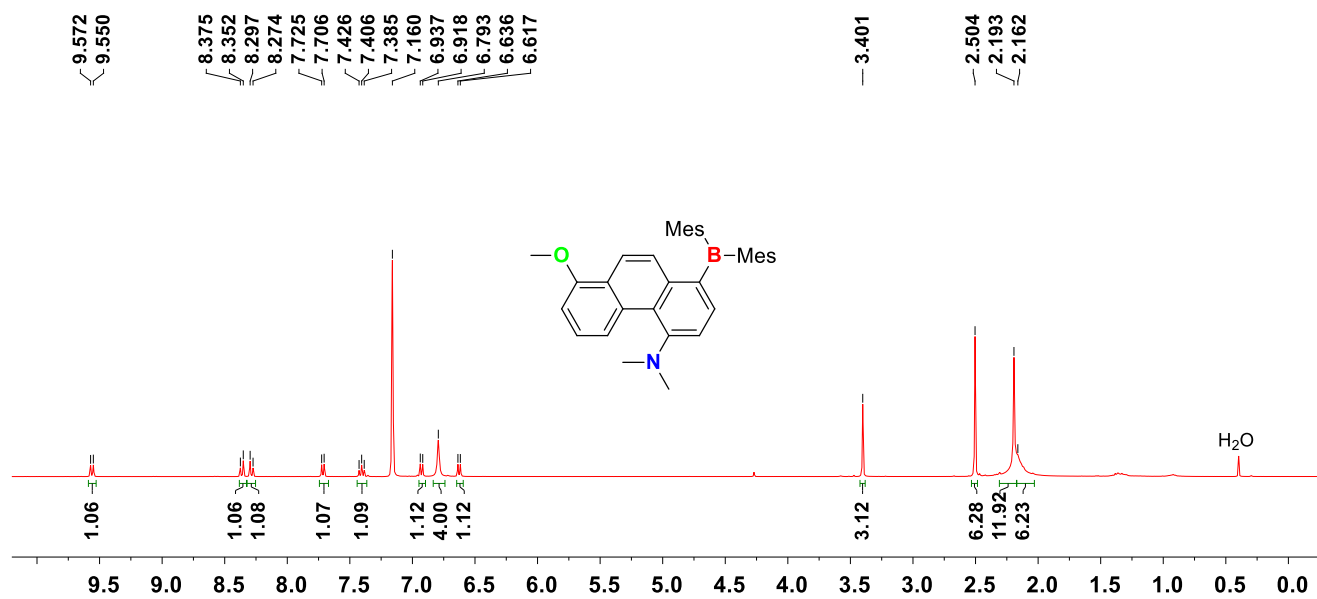

Figure S126.  $^1\text{H}$  NMR spectra of **3d** in  $\text{C}_6\text{D}_6$ .



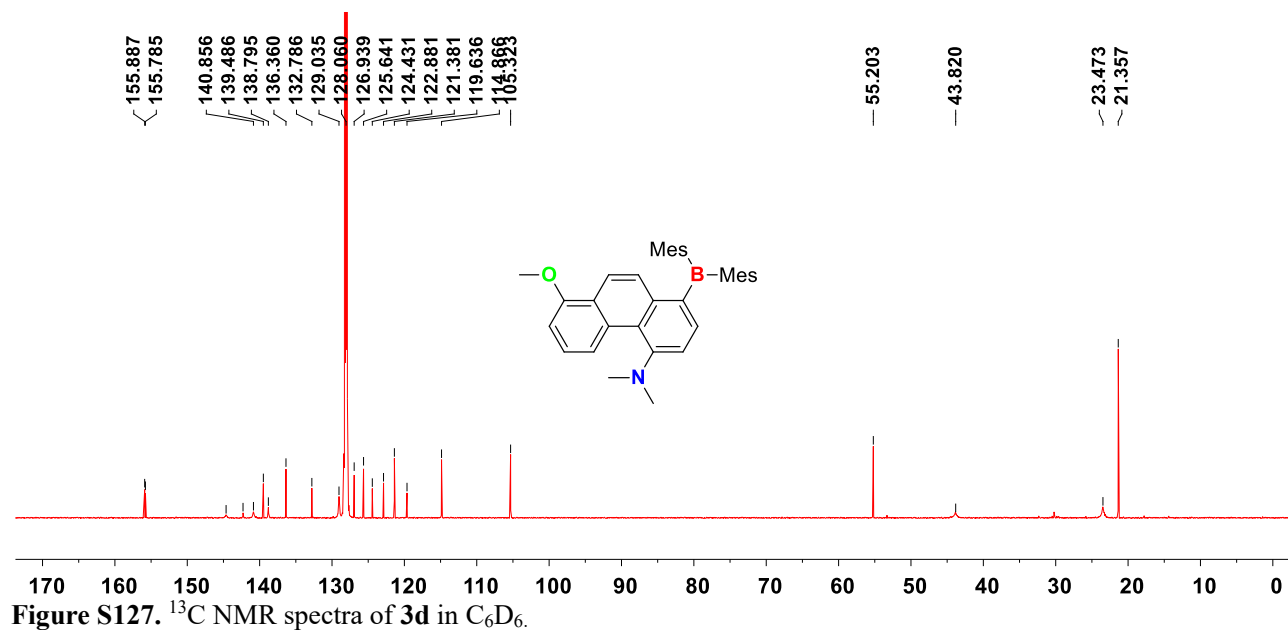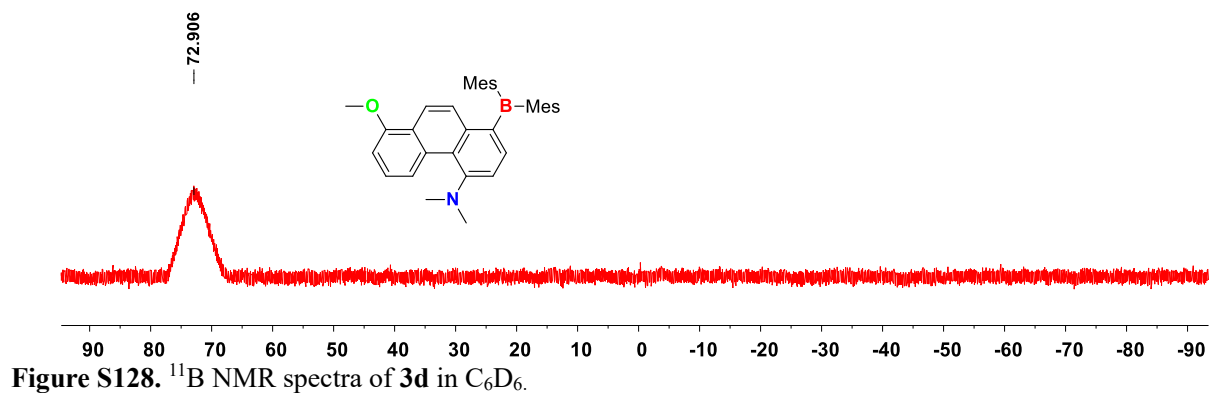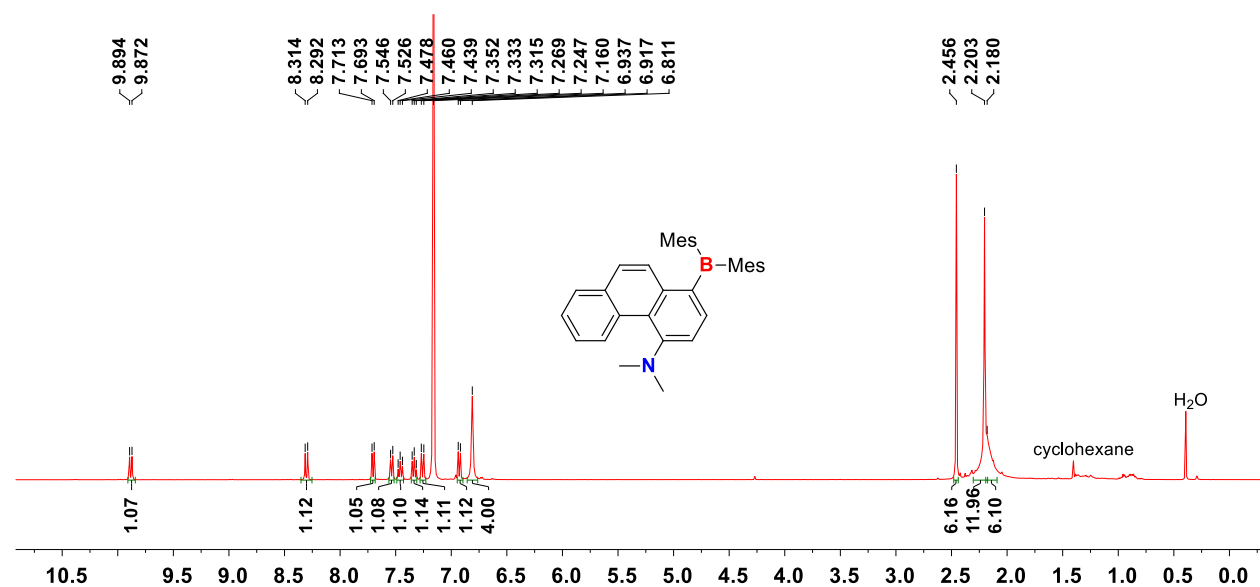

Figure S129.  $^1\text{H}$  NMR spectra of **4d** in  $\text{C}_6\text{D}_6$ .

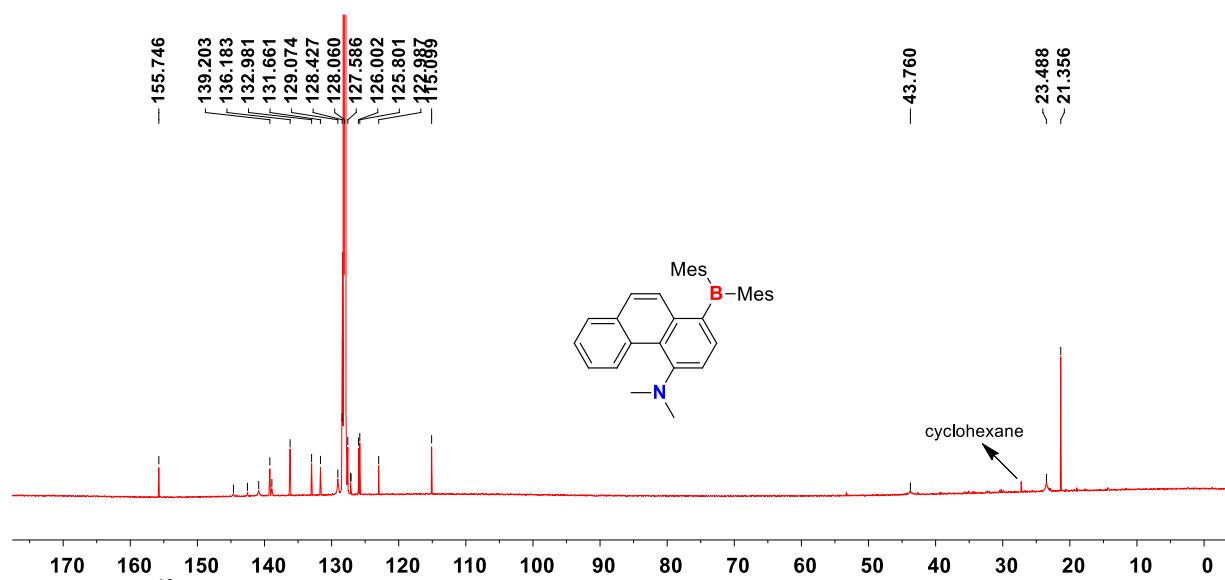

Figure S130.  $^{13}\text{C}$  NMR spectra of **4d** in  $\text{C}_6\text{D}_6$ .

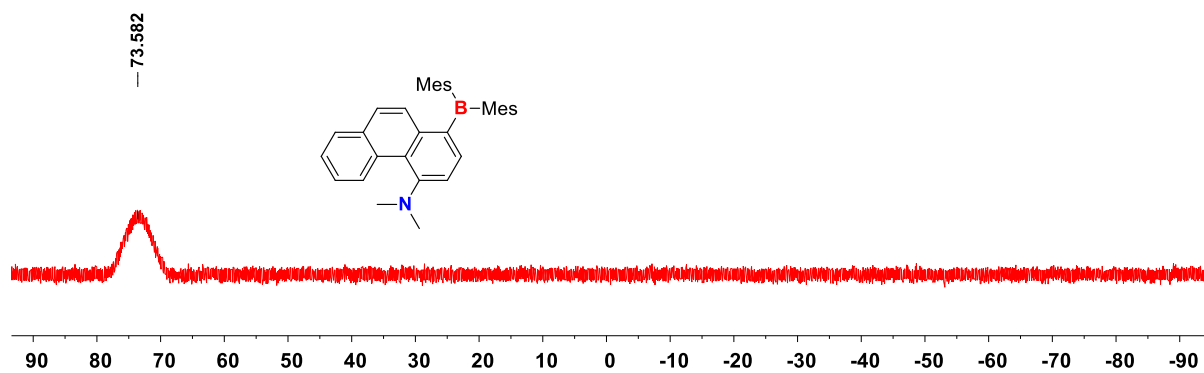

Figure S131.  $^{11}\text{B}$  NMR spectra of **4d** in  $\text{C}_6\text{D}_6$ .

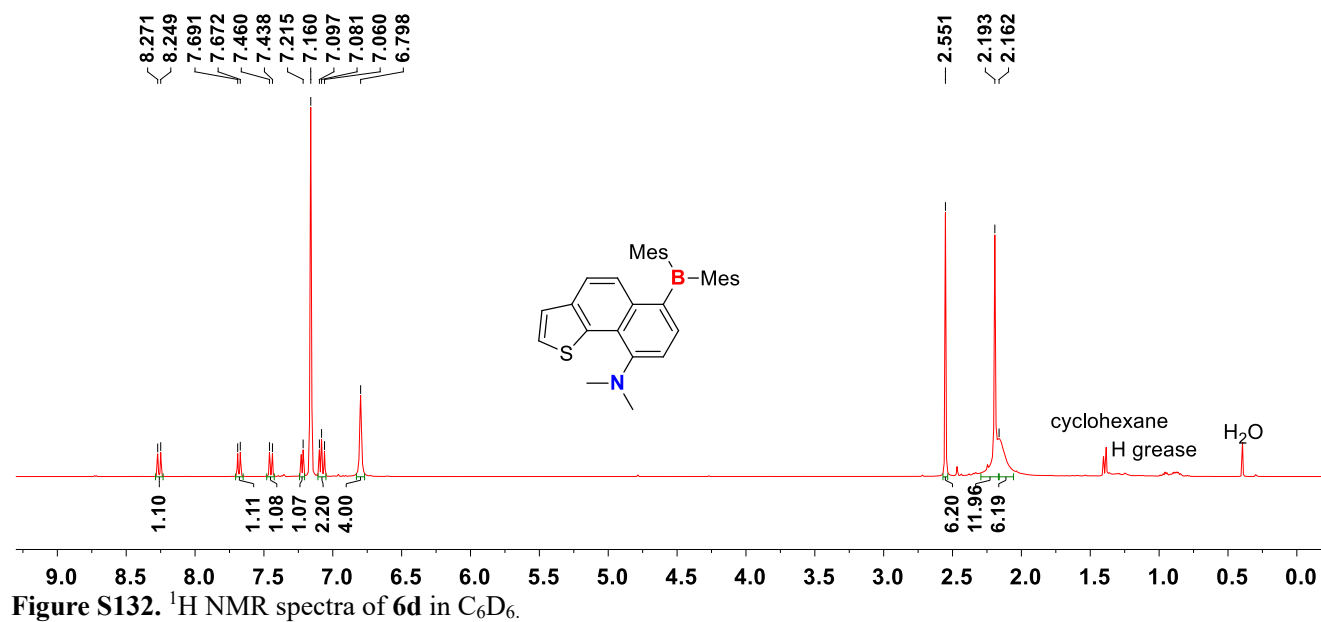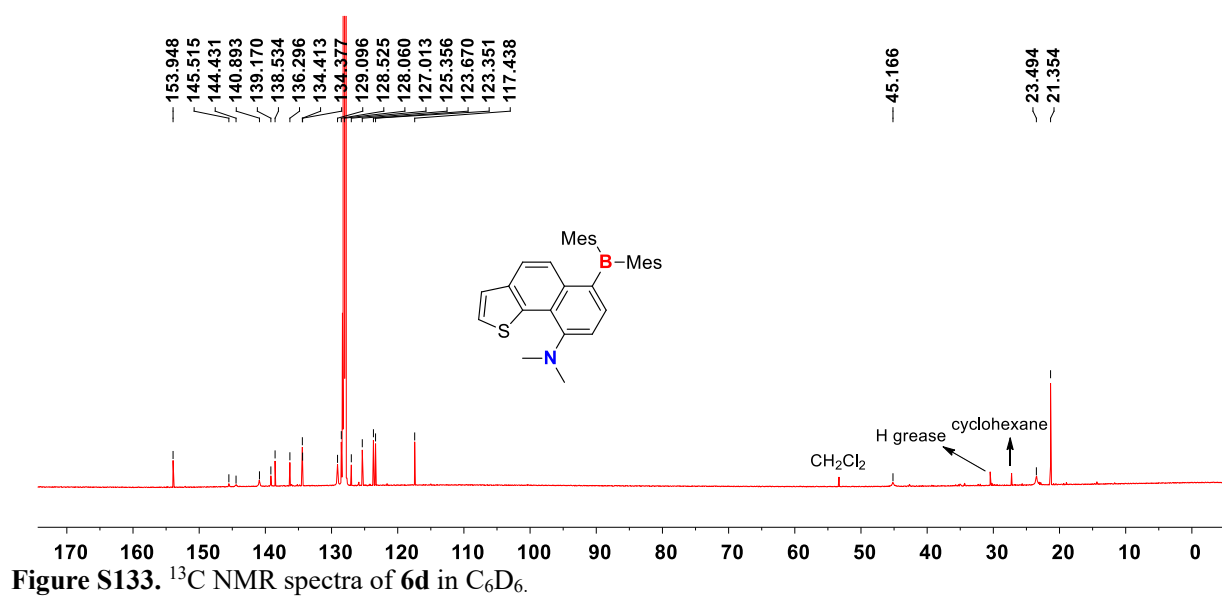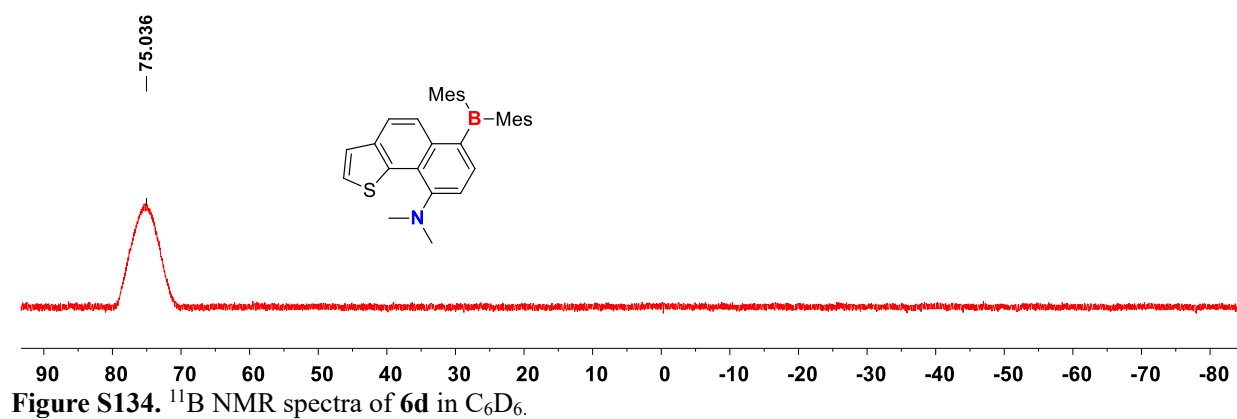

## S8: DFT Calculation Data of *E-1a-E-9a*, *1b-4b*, *1c-4c*, *1d-4d*, and *6d*

**Table S1.** TD-DFT calculated electronic transitions for *E-1a* along with their corresponding excitation energies and oscillator strengths.

| Compound              | Spin State     | Transition Configuration | Excitation Energy (nm, eV) | Oscillator Strength |
|-----------------------|----------------|--------------------------|----------------------------|---------------------|
| <i>E-1a</i>           | S <sub>1</sub> | HOMO → LUMO (96%)        | 386.34 (3.21)              | 0.2616              |
|                       | S <sub>2</sub> | HOMO-1 → LUMO (50%)      | 358.99 (3.45)              | 0.0243              |
|                       |                | HOMO → LUMO+1 (46%)      |                            |                     |
|                       | S <sub>3</sub> | HOMO-2 → LUMO (91%)      | 341.42 (3.63)              | 0.0653              |
|                       |                | HOMO-2 → LUMO+1 (5%)     |                            |                     |
|                       | S <sub>4</sub> | HOMO-1 → LUMO (37%)      | 329.19 (3.77)              | 0.3698              |
|                       |                | HOMO-1 → LUMO+1 (13%)    |                            |                     |
|                       |                | HOMO → LUMO+1 (47%)      |                            |                     |
|                       | S <sub>5</sub> | HOMO-3 → LUMO (89%)      | 321.93 (3.85)              | 0.0027              |
|                       |                | HOMO-3 → LUMO+1 (4%)     |                            |                     |
| HOMO-6 → LUMO+1 (20%) |                |                          |                            |                     |

**Table S2.** TD-DFT calculated electronic transitions for *Z-1a* along with their corresponding excitation energies and oscillator strengths.

| Compound    | Spin State     | Transition Configuration | Excitation Energy (nm, eV) | Oscillator Strength |
|-------------|----------------|--------------------------|----------------------------|---------------------|
| <i>Z-1a</i> | S <sub>1</sub> | HOMO → LUMO (90%)        | 362.44 (3.42)              | 0.3078              |
|             |                | HOMO-2 → LUMO (3%)       |                            |                     |
|             | S <sub>2</sub> | HOMO-1 → LUMO (39%)      | 340.67 (3.64)              | 0.0500              |
|             |                | HOMO → LUMO+1 (56%)      |                            |                     |
|             | S <sub>3</sub> | HOMO-2 → LUMO (20%)      | 338.53 (3.66)              | 0.0748              |
|             |                | HOMO-1 → LUMO (42%)      |                            |                     |
|             |                | HOMO → LUMO+1 (31%)      |                            |                     |
|             | S <sub>4</sub> | HOMO-2 → LUMO (72%)      | 321.00 (3.86)              | 0.0592              |
|             |                | HOMO-1 → LUMO (12%)      |                            |                     |
|             |                | HOMO → LUMO+1 (10%)      |                            |                     |
|             | S <sub>5</sub> | HOMO-4 → LUMO (18%)      | 315.95 (3.92)              | 0.0126              |
|             |                | HOMO-3 → LUMO (76%)      |                            |                     |
|             |                | HOMO → LUMO+2 (74%)      |                            |                     |
|             |                | HOMO-3 → LUMO+1 (2%)     |                            |                     |
|             |                | HOMO-1 → LUMO+1 (4%)     |                            |                     |

**Table S3.** TD-DFT calculated electronic transitions for *1b* along with their corresponding excitation energies and oscillator strengths.

| Compound  | Spin State     | Transition Configuration | Excitation Energy (nm, eV) | Oscillator Strength |
|-----------|----------------|--------------------------|----------------------------|---------------------|
| <i>1b</i> | S <sub>1</sub> | HOMO → LUMO (100%)       | 649.57 (1.91)              | 0.0520              |
|           | S <sub>2</sub> | HOMO-1 → LUMO (6%)       | 473.25 (2.62)              | 0.1469              |
|           |                | HOMO → LUMO+1 (92%)      |                            |                     |
|           | S <sub>3</sub> | HOMO-1 → LUMO (81%)      | 393.14 (3.15)              | 0.1830              |
|           |                | HOMO → LUMO+2 (11%)      |                            |                     |

|  |                |                     |               |        |
|--|----------------|---------------------|---------------|--------|
|  |                | HOMO → LUMO+1 (5%)  |               |        |
|  | S <sub>4</sub> | HOMO-2 → LUMO (85%) | 376.17 (3.30) | 0.0479 |
|  |                | HOMO → LUMO+2 (9%)  |               |        |
|  | S <sub>5</sub> | HOMO-4 → LUMO (12%) | 360.22 (3.44) | 0.0061 |
|  |                | HOMO-3 → LUMO (64%) |               |        |
|  |                | HOMO → LUMO+2 (12%) |               |        |
|  |                | HOMO-2 → LUMO (4%)  |               |        |
|  |                | HOMO-1 → LUMO (3%)  |               |        |

**Table S4.** TD-DFT calculated electronic transitions for **1c** along with their corresponding excitation energies and oscillator strengths.

| Compound  | Spin State     | Transition Configuration | Excitation Energy (nm, eV) | Oscillator Strength |
|-----------|----------------|--------------------------|----------------------------|---------------------|
| <b>1c</b> | S <sub>1</sub> | HOMO → LUMO (92%)        | 377.20 (3.29)              | 0.4413              |
|           |                | HOMO → LUMO+1 (3%)       |                            |                     |
|           | S <sub>2</sub> | HOMO → LUMO (2%)         | 366.71 (3.38)              | 0.0163              |
|           |                | HOMO → LUMO+1 (97%)      |                            |                     |
|           | S <sub>3</sub> | HOMO-1 → LUMO (98%)      | 346.16 (3.58)              | 0.0403              |
|           | S <sub>4</sub> | HOMO-2 → LUMO (94%)      | 327.22 (3.79)              | 0.0082              |
|           |                | HOMO-5 → LUMO (2%)       |                            |                     |
|           | S <sub>5</sub> | HOMO-3 → LUMO (96%)      | 321.22 (3.86)              | 0.0112              |

**Table S5.** TD-DFT calculated electronic transitions for **1d** along with their corresponding excitation energies and oscillator strengths.

| Compound           | Spin State     | Transition Configuration | Excitation Energy (nm, eV) | Oscillator Strength |
|--------------------|----------------|--------------------------|----------------------------|---------------------|
| <b>1d</b>          | S <sub>1</sub> | HOMO → LUMO (94%)        | 378.83 (3.27)              | 0.2957              |
|                    | S <sub>2</sub> | HOMO-2 → LUMO (18%)      | 348.57 (3.56)              | 0.0150              |
|                    |                | HOMO → LUMO+1 (73%)      |                            |                     |
|                    |                | HOMO-3 → LUMO (3%)       |                            |                     |
|                    | S <sub>3</sub> | HOMO-1 → LUMO (94%)      | 345.25 (3.59)              | 0.0910              |
|                    |                | HOMO-2 → LUMO (2%)       |                            |                     |
|                    | S <sub>4</sub> | HOMO-4 → LUMO (11%)      | 326.12 (3.80)              | 0.0198              |
|                    |                | HOMO-3 → LUMO (27%)      |                            |                     |
|                    |                | HOMO-2 → LUMO (49%)      |                            |                     |
|                    |                | HOMO-5 → LUMO (3%)       |                            |                     |
|                    |                | HOMO → LUMO+1 (6%)       |                            |                     |
|                    | S <sub>5</sub> | HOMO-5 → LUMO (53%)      | 320.34 (3.87)              | 0.0275              |
|                    |                | HOMO-4 → LUMO (17%)      |                            |                     |
|                    |                | HOMO-3 → LUMO (18%)      |                            |                     |
| HOMO-2 → LUMO (7%) |                |                          |                            |                     |
| HOMO → LUMO+1 (2%) |                |                          |                            |                     |

**Table S6.** TD-DFT calculated electronic transitions for **E-2a** along with their corresponding excitation energies and oscillator strengths.

| Compound | Spin State | Transition Configuration | Excitation Energy (nm, eV) | Oscillator Strength |
|----------|------------|--------------------------|----------------------------|---------------------|
|----------|------------|--------------------------|----------------------------|---------------------|

|                       |                |                       |               |        |
|-----------------------|----------------|-----------------------|---------------|--------|
| <b>E-2a</b>           | S <sub>1</sub> | HOMO → LUMO (95%)     | 385.45 (3.22) | 0.2828 |
|                       | S <sub>2</sub> | HOMO-1 → LUMO (58%)   | 359.34 (3.45) | 0.0252 |
|                       |                | HOMO → LUMO+1 (38%)   |               |        |
|                       | S <sub>3</sub> | HOMO-2 → LUMO (92%)   | 341.11 (3.63) | 0.0665 |
|                       |                | HOMO-2 → LUMO+1 (4%)  |               |        |
|                       | S <sub>4</sub> | HOMO-1 → LUMO (31%)   | 329.03 (3.77) | 0.3733 |
|                       |                | HOMO-1 → LUMO+1 (12%) |               |        |
|                       |                | HOMO → LUMO+1 (54%)   |               |        |
|                       | S <sub>5</sub> | HOMO-3 → LUMO (87%)   | 321.45 (3.86) | 0.0035 |
|                       |                | HOMO-4 → LUMO (4%)    |               |        |
| HOMO-3 → LUMO+1 (3%)  |                |                       |               |        |
| HOMO-6 → LUMO+1 (18%) |                |                       |               |        |
| HOMO-2 → LUMO+1 (10%) |                |                       |               |        |

**Table S7.** TD-DFT calculated electronic transitions for **Z-2a** along with their corresponding excitation energies and oscillator strengths.

| Compound            | Spin State     | Transition Configuration | Excitation Energy (nm, eV) | Oscillator Strength |
|---------------------|----------------|--------------------------|----------------------------|---------------------|
| <b>Z-2a</b>         | S <sub>1</sub> | HOMO → LUMO (89%)        | 360.93 (3.44)              | 0.3159              |
|                     |                | HOMO-3 → LUMO (2%)       |                            |                     |
|                     |                | HOMO-2 → LUMO (4%)       |                            |                     |
|                     | S <sub>2</sub> | HOMO-1 → LUMO (74%)      | 340.14 (3.65)              | 0.0869              |
|                     |                | HOMO → LUMO+1 (12%)      |                            |                     |
|                     |                | HOMO-3 → LUMO (2%)       |                            |                     |
|                     |                | HOMO-2 → LUMO (7%)       |                            |                     |
|                     | S <sub>3</sub> | HOMO-2 → LUMO (29%)      | 335.79 (3.69)              | 0.0328              |
|                     |                | HOMO → LUMO+1 (66%)      |                            |                     |
|                     | S <sub>4</sub> | HOMO-2 → LUMO (56%)      | 322.71 (3.84)              | 0.0602              |
|                     |                | HOMO-1 → LUMO (19%)      |                            |                     |
|                     |                | HOMO → LUMO+1 (20%)      |                            |                     |
|                     | S <sub>5</sub> | HOMO-4 → LUMO (18%)      | 316.13 (3.92)              | 0.0141              |
|                     |                | HOMO-3 → LUMO (77%)      |                            |                     |
| HOMO → LUMO+2 (84%) |                |                          |                            |                     |
| HOMO-7 → LUMO (3%)  |                |                          |                            |                     |

**Table S8.** TD-DFT calculated electronic transitions for **2b** along with their corresponding excitation energies and oscillator strengths.

| Compound  | Spin State     | Transition Configuration | Excitation Energy (nm, eV) | Oscillator Strength |
|-----------|----------------|--------------------------|----------------------------|---------------------|
| <b>2b</b> | S <sub>1</sub> | HOMO → LUMO (100%)       | 638.53 (1.94)              | 0.0584              |
|           | S <sub>2</sub> | HOMO → LUMO+1 (94%)      | 475.60 (2.61)              | 0.1537              |
|           |                | HOMO-1 → LUMO (4%)       |                            |                     |
|           | S <sub>3</sub> | HOMO-1 → LUMO (78%)      | 388.07 (3.19)              | 0.1985              |
|           |                | HOMO → LUMO+2 (15%)      |                            |                     |
|           |                | HOMO → LUMO+1 (3%)       |                            |                     |
|           | S <sub>4</sub> | HOMO-2 → LUMO (81%)      | 369.94 (3.35)              | 0.0394              |
|           |                | HOMO → LUMO+2 (12%)      |                            |                     |

|  |                |                      |               |        |
|--|----------------|----------------------|---------------|--------|
|  |                | HOMO-2 → LUMO+1 (3%) |               |        |
|  | S <sub>5</sub> | HOMO-3 → LUMO (24%)  | 355.77 (3.48) | 0.0546 |
|  |                | HOMO → LUMO+2 (45%)  |               |        |
|  |                | HOMO-6 → LUMO (2%)   |               |        |
|  |                | HOMO-4 → LUMO (6%)   |               |        |
|  |                | HOMO-2 → LUMO (9%)   |               |        |
|  |                | HOMO-1 → LUMO (9%)   |               |        |

**Table S9.** TD-DFT calculated electronic transitions for **2c** along with their corresponding excitation energies and oscillator strengths.

| Compound  | Spin State     | Transition Configuration | Excitation Energy (nm, eV) | Oscillator Strength |
|-----------|----------------|--------------------------|----------------------------|---------------------|
| <b>2c</b> | S <sub>1</sub> | HOMO → LUMO (94%)        | 377.45 (3.28)              | 0.4504              |
|           | S <sub>2</sub> | HOMO → LUMO+1 (99%)      | 361.96 (3.43)              | 0.0033              |
|           | S <sub>3</sub> | HOMO-1 → LUMO (97%)      | 348.01 (3.56)              | 0.0396              |
|           | S <sub>4</sub> | HOMO-2 → LUMO (93%)      | 328.27 (3.78)              | 0.0115              |
|           |                | HOMO-5 → LUMO (3%)       |                            |                     |
|           | S <sub>5</sub> | HOMO-3 → LUMO (95%)      | 321.64 (3.85)              | 0.0134              |

**Table S10.** TD-DFT calculated electronic transitions for **2d** along with their corresponding excitation energies and oscillator strengths.

| Compound            | Spin State     | Transition Configuration | Excitation Energy (nm, eV) | Oscillator Strength |
|---------------------|----------------|--------------------------|----------------------------|---------------------|
| <b>2d</b>           | S <sub>1</sub> | HOMO → LUMO (95%)        | 380.91 (3.25)              | 0.3013              |
|                     | S <sub>2</sub> | HOMO-2 → LUMO (20%)      | 346.25 (3.58)              | 0.0220              |
|                     |                | HOMO-1 → LUMO (13%)      |                            |                     |
|                     |                | HOMO → LUMO+1 (59%)      |                            |                     |
|                     |                | HOMO-3 → LUMO (2%)       |                            |                     |
|                     |                | HOMO-2 → LUMO+2 (2%)     |                            |                     |
|                     | S <sub>3</sub> | HOMO-2 → LUMO (11%)      | 344.93 (3.59)              | 0.0750              |
|                     |                | HOMO-1 → LUMO (81%)      |                            |                     |
|                     |                | HOMO → LUMO+1 (5%)       |                            |                     |
|                     | S <sub>4</sub> | HOMO-3 → LUMO (37%)      | 326.01 (3.80)              | 0.0278              |
|                     |                | HOMO-2 → LUMO (37%)      |                            |                     |
|                     |                | HOMO-4 → LUMO (8%)       |                            |                     |
|                     |                | HOMO → LUMO+1 (9%)       |                            |                     |
|                     | S <sub>5</sub> | HOMO-5 → LUMO (23%)      | 320.11 (3.87)              | 0.0458              |
| HOMO-4 → LUMO (48%) |                |                          |                            |                     |
| HOMO-2 → LUMO (11%) |                |                          |                            |                     |
| HOMO-4 → LUMO (7%)  |                |                          |                            |                     |
| HOMO → LUMO+1 (6%)  |                |                          |                            |                     |

**Table S11.** TD-DFT calculated electronic transitions for **E-3a** along with their corresponding excitation energies and oscillator strengths.

| Compound    | Spin State     | Transition Configuration | Excitation Energy (nm, eV) | Oscillator Strength |
|-------------|----------------|--------------------------|----------------------------|---------------------|
| <b>E-3a</b> | S <sub>1</sub> | HOMO → LUMO (92%)        | 392.35 (3.16)              | 0.2679              |

|  |                |                       |               |        |
|--|----------------|-----------------------|---------------|--------|
|  |                | HOMO → LUMO+1 (3%)    |               |        |
|  | S <sub>2</sub> | HOMO-1 → LUMO (77%)   | 363.99 (3.41) | 0.0801 |
|  |                | HOMO → LUMO+1 (16%)   |               |        |
|  |                | HOMO → LUMO (4%)      |               |        |
|  | S <sub>3</sub> | HOMO-2 → LUMO (94%)   | 337.14 (3.68) | 0.0672 |
|  |                | HOMO-2 → LUMO+1 (3%)  |               |        |
|  | S <sub>4</sub> | HOMO-1 → LUMO (15%)   | 331.13 (3.74) | 0.4143 |
|  |                | HOMO-1 → LUMO+1 (12%) |               |        |
|  |                | HOMO → LUMO+1 (65%)   |               |        |
|  | S <sub>5</sub> | HOMO-3 → LUMO (81%)   | 317.48 (3.91) | 0.0208 |
|  |                | HOMO-4 → LUMO (5%)    |               |        |
|  |                | HOMO-1 → LUMO+1 (4%)  |               |        |
|  |                | HOMO-3 → LUMO+1 (3%)  |               |        |
|  |                | HOMO-2 → LUMO+1 (91%) |               |        |

**Table S12.** TD-DFT calculated electronic transitions for **Z-3a** along with their corresponding excitation energies and oscillator strengths.

| Compound    | Spin State     | Transition Configuration | Excitation Energy (nm, eV) | Oscillator Strength |
|-------------|----------------|--------------------------|----------------------------|---------------------|
| <b>Z-3a</b> | S <sub>1</sub> | HOMO → LUMO (87%)        | 368.27 (3.37)              | 0.3220              |
|             |                | HOMO-3 → LUMO (2%)       |                            |                     |
|             |                | HOMO-1 → LUMO (6%)       |                            |                     |
|             | S <sub>2</sub> | HOMO-1 → LUMO (84%)      | 351.77 (3.52)              | 0.0551              |
|             |                | HOMO → LUMO+1 (6%)       |                            |                     |
|             |                | HOMO → LUMO (5%)         |                            |                     |
|             | S <sub>3</sub> | HOMO-2 → LUMO (91%)      | 333.28 (3.72)              | 0.0837              |
|             |                | HOMO → LUMO (2%)         |                            |                     |
|             |                | HOMO → LUMO+1 (3%)       |                            |                     |
|             | S <sub>4</sub> | HOMO-2 → LUMO (3%)       | 325.83 (3.81)              | 0.0536              |
|             |                | HOMO-1 → LUMO (8%)       |                            |                     |
|             |                | HOMO → LUMO+1 (85%)      |                            |                     |
|             | S <sub>5</sub> | HOMO-4 → LUMO (19%)      | 313.07 (3.96)              | 0.0088              |
|             |                | HOMO-3 → LUMO (76%)      |                            |                     |

**Table S13.** TD-DFT calculated electronic transitions for **3b** along with their corresponding excitation energies and oscillator strengths.

| Compound  | Spin State     | Transition Configuration | Excitation Energy (nm, eV) | Oscillator Strength |
|-----------|----------------|--------------------------|----------------------------|---------------------|
| <b>3b</b> | S <sub>1</sub> | HOMO → LUMO (100%)       | 628.02 (1.97)              | 0.0430              |
|           | S <sub>2</sub> | HOMO → LUMO+1 (92%)      | 472.19 (2.63)              | 0.1525              |
|           |                | HOMO-1 → LUMO (7%)       |                            |                     |
|           | S <sub>3</sub> | HOMO-1 → LUMO (84%)      | 404.80 (3.06)              | 0.2173              |
|           |                | HOMO → LUMO+1 (6%)       |                            |                     |
|           |                | HOMO → LUMO+2 (8%)       |                            |                     |
|           | S <sub>4</sub> | HOMO-2 → LUMO (93%)      | 361.60 (3.43)              | 0.0168              |
|           |                | HOMO-2 → LUMO+1 (4%)     |                            |                     |
|           | S <sub>5</sub> | HOMO-3 → LUMO (48%)      | 346.52 (3.58)              | 0.0659              |



|  |  |                       |  |  |
|--|--|-----------------------|--|--|
|  |  | HOMO-1 → LUMO+1 (38%) |  |  |
|  |  | HOMO-4 → LUMO (3%)    |  |  |
|  |  | HOMO-3 → LUMO+1 (3%)  |  |  |
|  |  | HOMO → LUMO+2 (5%)    |  |  |

**Table S14.** TD-DFT calculated electronic transitions for **3c** along with their corresponding excitation energies and oscillator strengths.

| Compound       | Spin State          | Transition Configuration | Excitation Energy (nm, eV) | Oscillator Strength |
|----------------|---------------------|--------------------------|----------------------------|---------------------|
| <b>3c</b>      | S <sub>1</sub>      | HOMO → LUMO (92%)        | 380.29 (3.26)              | 0.4099              |
|                |                     | HOMO-1 → LUMO (4%)       |                            |                     |
|                | S <sub>2</sub>      | HOMO-1 → LUMO (93%)      | 358.86 (3.45)              | 0.0625              |
|                |                     | HOMO → LUMO (4%)         |                            |                     |
|                | S <sub>3</sub>      | HOMO → LUMO+1 (99%)      | 349.94 (3.54)              | 0.0032              |
|                | S <sub>4</sub>      | HOMO-2 → LUMO (94%)      | 331.81 (3.74)              | 0.0333              |
| S <sub>5</sub> | HOMO-3 → LUMO (94%) | 319.33 (3.88)            | 0.0133                     |                     |

**Table S15.** TD-DFT calculated electronic transitions for **3d** along with their corresponding excitation energies and oscillator strengths.

| Compound       | Spin State          | Transition Configuration | Excitation Energy (nm, eV) | Oscillator Strength |
|----------------|---------------------|--------------------------|----------------------------|---------------------|
| <b>3d</b>      | S <sub>1</sub>      | HOMO → LUMO (93%)        | 393.94 (3.15)              | 0.2312              |
|                |                     | HOMO-1 → LUMO (4%)       |                            |                     |
|                | S <sub>2</sub>      | HOMO-1 → LUMO (87%)      | 368.77 (3.36)              | 0.0771              |
|                |                     | HOMO → LUMO (4%)         |                            |                     |
|                |                     | HOMO → LUMO+1 (4%)       |                            |                     |
|                | S <sub>2</sub>      | HOMO → LUMO+2 (3%)       | 340.53 (3.64)              | 0.0902              |
|                |                     | HOMO-2 → LUMO (97%)      |                            |                     |
|                |                     | HOMO-1 → LUMO+1 (12%)    |                            |                     |
|                | S <sub>4</sub>      | HOMO → LUMO+1 (52%)      | 324.20 (3.82)              | 0.0670              |
|                |                     | HOMO → LUMO+2 (13%)      |                            |                     |
|                |                     | HOMO-6 → LUMO (5%)       |                            |                     |
|                |                     | HOMO-1 → LUMO (7%)       |                            |                     |
|                |                     | HOMO-1 → LUMO+2 (7%)     |                            |                     |
| S <sub>5</sub> | HOMO-4 → LUMO (11%) | 321.24 (3.86)            | 0.0009                     |                     |
|                | HOMO-3 → LUMO (85%) |                          |                            |                     |

**Table S16.** TD-DFT calculated electronic transitions for **E-4a** along with their corresponding excitation energies and oscillator strengths.

| Compound    | Spin State         | Transition Configuration | Excitation Energy (nm, eV) | Oscillator Strength |
|-------------|--------------------|--------------------------|----------------------------|---------------------|
| <b>E-4a</b> | S <sub>1</sub>     | HOMO → LUMO (91%)        | 387.19 (3.20)              | 0.2721              |
|             |                    | HOMO-1 → LUMO (5%)       |                            |                     |
|             | S <sub>2</sub>     | HOMO-1 → LUMO (79%)      | 360.91 (3.44)              | 0.0750              |
|             |                    | HOMO-2 → LUMO (3%)       |                            |                     |
|             |                    | HOMO → LUMO (5%)         |                            |                     |
|             | HOMO → LUMO+1 (9%) |                          |                            |                     |

|  |                |                     |               |        |
|--|----------------|---------------------|---------------|--------|
|  | S <sub>3</sub> | HOMO-2 → LUMO (89%) | 344.43 (3.60) | 0.0820 |
|  |                | HOMO → LUMO+1 (7%)  |               |        |
|  | S <sub>4</sub> | HOMO-4 → LUMO (15%) | 326.72 (3.79) | 0.0034 |
|  |                | HOMO-3 → LUMO (77%) |               |        |
|  |                | HOMO-5 → LUMO (4%)  |               |        |
|  | S <sub>5</sub> | HOMO-5 → LUMO (13%) | 320.67 (3.87) | 0.0059 |
|  |                | HOMO-4 → LUMO (65%) |               |        |
|  |                | HOMO-3 → LUMO (17%) |               |        |

**Table S17.** TD-DFT calculated electronic transitions for **Z-4a** along with their corresponding excitation energies and oscillator strengths.

| Compound    | Spin State     | Transition Configuration | Excitation Energy (nm, eV) | Oscillator Strength |
|-------------|----------------|--------------------------|----------------------------|---------------------|
| <b>Z-4a</b> | S <sub>1</sub> | HOMO → LUMO (91%)        | 365.86 (3.39)              | 0.3342              |
|             |                | HOMO-3 → LUMO (2%)       |                            |                     |
|             |                | HOMO-2 → LUMO (3%)       |                            |                     |
|             | S <sub>2</sub> | HOMO-1 → LUMO (75%)      | 343.75 (3.61)              | 0.0292              |
|             |                | HOMO → LUMO+1 (20%)      |                            |                     |
|             |                | HOMO-2 → LUMO (2%)       |                            |                     |
|             | S <sub>3</sub> | HOMO-2 → LUMO (83%)      | 334.66 (3.70)              | 0.0793              |
|             |                | HOMO → LUMO+1 (12%)      |                            |                     |
|             |                | HOMO → LUMO (2%)         |                            |                     |
|             | S <sub>4</sub> | HOMO-1 → LUMO (22%)      | 325.54 (3.81)              | 0.0643              |
|             |                | HOMO → LUMO+1 (66%)      |                            |                     |
|             |                | HOMO-2 → LUMO (9%)       |                            |                     |
|             | S <sub>5</sub> | HOMO-4 → LUMO (18%)      | 314.45 (3.94)              | 0.0101              |
|             |                | HOMO-3 → LUMO (77%)      |                            |                     |

**Table S18.** TD-DFT calculated electronic transitions for **4b** along with their corresponding excitation energies and oscillator strengths.

| Compound  | Spin State     | Transition Configuration | Excitation Energy (nm, eV) | Oscillator Strength |
|-----------|----------------|--------------------------|----------------------------|---------------------|
| <b>4b</b> | S <sub>1</sub> | HOMO → LUMO (100%)       | 641.11 (1.93)              | 0.0495              |
|           | S <sub>2</sub> | HOMO → LUMO+1 (92%)      | 479.48 (2.59)              | 0.1491              |
|           |                | HOMO-1 → LUMO (7%)       |                            |                     |
|           | S <sub>3</sub> | HOMO-1 → LUMO (79%)      | 396.21 (3.13)              | 0.2224              |
|           |                | HOMO → LUMO+2 (15%)      |                            |                     |
|           |                | HOMO → LUMO+1 (5%)       |                            |                     |
|           | S <sub>4</sub> | HOMO-2 → LUMO (91%)      | 365.46 (3.39)              | 0.0191              |
|           |                | HOMO-2 → LUMO+1 (3%)     |                            |                     |
|           |                | HOMO → LUMO+2 (3%)       |                            |                     |
|           | S <sub>5</sub> | HOMO-3 → LUMO (69%)      | 349.08 (3.55)              | 0.0328              |
|           |                | HOMO → LUMO+2 (14%)      |                            |                     |
|           |                | HOMO-4 → LUMO (5%)       |                            |                     |
|           |                | HOMO-3 → LUMO+1 (2%)     |                            |                     |
|           |                | HOMO-1 → LUMO (2%)       |                            |                     |
|           |                | HOMO-1 → LUMO+1 (4%)     |                            |                     |

**Table S19.** TD-DFT calculated electronic transitions for **4c** along with their corresponding excitation energies and oscillator strengths.

| Compound       | Spin State          | Transition Configuration | Excitation Energy (nm, eV) | Oscillator Strength |
|----------------|---------------------|--------------------------|----------------------------|---------------------|
| <b>4c</b>      | S <sub>1</sub>      | HOMO → LUMO (94%)        | 378.92 (3.27)              | 0.4471              |
|                | S <sub>2</sub>      | HOMO → LUMO+1 (99%)      | 350.93 (3.53)              | 0.0057              |
|                | S <sub>3</sub>      | HOMO-1 → LUMO (97%)      | 346.91 (3.57)              | 0.0438              |
|                | S <sub>4</sub>      | HOMO-2 → LUMO (92%)      | 327.31 (3.79)              | 0.0194              |
|                |                     | HOMO-4 → LUMO (4%)       |                            |                     |
| S <sub>5</sub> | HOMO-3 → LUMO (94%) | 318.94 (3.89)            | 0.0161                     |                     |

**Table S20.** TD-DFT calculated electronic transitions for **4d** along with their corresponding excitation energies and oscillator strengths.

| Compound           | Spin State     | Transition Configuration | Excitation Energy (nm, eV) | Oscillator Strength |
|--------------------|----------------|--------------------------|----------------------------|---------------------|
| <b>4d</b>          | S <sub>1</sub> | HOMO → LUMO (94%)        | 384.43 (3.23)              | 0.2877              |
|                    | S <sub>2</sub> | HOMO-1 → LUMO (74%)      | 354.02 (3.50)              | 0.0059              |
|                    |                | HOMO → LUMO+1 (21%)      |                            |                     |
|                    | S <sub>3</sub> | HOMO-2 → LUMO (97%)      | 341.69 (3.63)              | 0.0888              |
|                    | S <sub>4</sub> | HOMO-3 → LUMO (21%)      | 324.42 (3.82)              | 0.0751              |
|                    |                | HOMO-1 → LUMO (17%)      |                            |                     |
|                    |                | HOMO → LUMO+1 (49%)      |                            |                     |
|                    |                | HOMO-1 → LUMO+1 (4%)     |                            |                     |
|                    | S <sub>5</sub> | HOMO-4 → LUMO (25%)      | 320.41 (3.87)              | 0.0247              |
|                    |                | HOMO-3 → LUMO (52%)      |                            |                     |
|                    |                | HOMO → LUMO+1 (12%)      |                            |                     |
| HOMO-1 → LUMO (5%) |                |                          |                            |                     |

**Table S21.** TD-DFT calculated electronic transitions for **E-5a** along with their corresponding excitation energies and oscillator strengths.

| Compound       | Spin State          | Transition Configuration | Excitation Energy (nm, eV) | Oscillator Strength |
|----------------|---------------------|--------------------------|----------------------------|---------------------|
| <b>E-5a</b>    | S <sub>1</sub>      | HOMO → LUMO (90%)        | 377.45 (3.28)              | 0.1421              |
|                |                     | HOMO → LUMO+1 (7%)       |                            |                     |
|                | S <sub>2</sub>      | HOMO-1 → LUMO (94%)      | 350.06 (3.54)              | 0.0898              |
|                |                     | HOMO-1 → LUMO+1 (3%)     |                            |                     |
|                | S <sub>3</sub>      | HOMO-2 → LUMO (80%)      | 330.64 (3.75)              | 0.0408              |
|                |                     | HOMO → LUMO+1 (10%)      |                            |                     |
|                |                     | HOMO-3 → LUMO (4%)       |                            |                     |
|                | S <sub>4</sub>      | HOMO-3 → LUMO (82%)      | 326.55 (3.80)              | 0.0506              |
|                |                     | HOMO-3 → LUMO+1 (2%)     |                            |                     |
|                |                     | HOMO-2 → LUMO (7%)       |                            |                     |
|                |                     | HOMO → LUMO+1 (5%)       |                            |                     |
| S <sub>5</sub> | HOMO-4 → LUMO (96%) | 320.45 (3.87)            | 0.0161                     |                     |

**Table S22.** TD-DFT calculated electronic transitions for **Z-5a** along with their corresponding excitation

energies and oscillator strengths.

| Compound       | Spin State          | Transition Configuration | Excitation Energy (nm, eV) | Oscillator Strength |
|----------------|---------------------|--------------------------|----------------------------|---------------------|
| <b>Z-5a</b>    | S <sub>1</sub>      | HOMO → LUMO (84%)        | 352.04 (3.52)              | 0.0784              |
|                |                     | HOMO-2 → LUMO (2%)       |                            |                     |
|                |                     | HOMO-1 → LUMO (12%)      |                            |                     |
|                | S <sub>2</sub>      | HOMO-1 → LUMO (86%)      | 350.38 (3.54)              | 0.0892              |
|                |                     | HOMO → LUMO (11%)        |                            |                     |
|                | S <sub>3</sub>      | HOMO-2 → LUMO (89%)      | 326.37 (3.80)              | 0.0167              |
|                |                     | HOMO → LUMO (2%)         |                            |                     |
|                |                     | HOMO-3 → LUMO (5%)       |                            |                     |
|                | S <sub>4</sub>      | HOMO-2 → LUMO (4%)       | 321.28 (3.86)              | 0.0625              |
|                |                     | HOMO-3 → LUMO (91%)      |                            |                     |
| S <sub>5</sub> | HOMO-4 → LUMO (97%) | 319.13 (3.89)            | 0.0111                     |                     |

**Table S23.** TD-DFT calculated electronic transitions for **E-6a** along with their corresponding excitation energies and oscillator strengths.

| Compound           | Spin State     | Transition Configuration | Excitation Energy (nm, eV) | Oscillator Strength |
|--------------------|----------------|--------------------------|----------------------------|---------------------|
| <b>E-6a</b>        | S <sub>1</sub> | HOMO → LUMO (91%)        | 386.43 (3.21)              | 0.2679              |
|                    |                | HOMO-1 → LUMO (4%)       |                            |                     |
|                    | S <sub>2</sub> | HOMO-1 → LUMO (82%)      | 359.73 (3.45)              | 0.1118              |
|                    |                | HOMO-2 → LUMO (2%)       |                            |                     |
|                    |                | HOMO → LUMO (5%)         |                            |                     |
|                    |                | HOMO → LUMO+1 (8%)       |                            |                     |
|                    | S <sub>3</sub> | HOMO-2 → LUMO (92%)      | 342.75 (3.62)              | 0.0856              |
|                    |                | HOMO → LUMO+1 (4%)       |                            |                     |
|                    | S <sub>4</sub> | HOMO-4 → LUMO (16%)      | 324.58 (3.82)              | 0.0034              |
|                    |                | HOMO-3 → LUMO (78%)      |                            |                     |
|                    |                | HOMO-5 → LUMO (2%)       |                            |                     |
|                    | S <sub>5</sub> | HOMO-4 → LUMO (69%)      | 318.25 (3.90)              | 0.0049              |
|                    |                | HOMO-3 → LUMO (17%)      |                            |                     |
| HOMO-5 → LUMO (9%) |                |                          |                            |                     |

**Table S24.** TD-DFT calculated electronic transitions for **Z-6a** along with their corresponding excitation energies and oscillator strengths.

| Compound    | Spin State     | Transition Configuration | Excitation Energy (nm, eV) | Oscillator Strength |
|-------------|----------------|--------------------------|----------------------------|---------------------|
| <b>Z-6a</b> | S <sub>1</sub> | HOMO → LUMO (91%)        | 359.77 (3.45)              | 0.3369              |
|             |                | HOMO-3 → LUMO (3%)       |                            |                     |
|             |                | HOMO-2 → LUMO (3%)       |                            |                     |
|             | S <sub>2</sub> | HOMO-1 → LUMO (93%)      | 350.29 (3.54)              | 0.0333              |
|             |                | HOMO-2 → LUMO (3%)       |                            |                     |
|             |                | HOMO → LUMO+1 (3%)       |                            |                     |
|             | S <sub>3</sub> | HOMO-2 → LUMO (84%)      | 331.88 (3.74)              | 0.0666              |
|             |                | HOMO → LUMO+1 (10%)      |                            |                     |
|             | S <sub>4</sub> | HOMO → LUMO+1 (84%)      | 324.16 (3.82)              | 0.0280              |

|  |                |                     |               |        |
|--|----------------|---------------------|---------------|--------|
|  |                | HOMO-2 → LUMO (8%)  |               |        |
|  |                | HOMO-1 → LUMO (5%)  |               |        |
|  | S <sub>5</sub> | HOMO-4 → LUMO (16%) | 314.57 (3.94) | 0.0147 |
|  |                | HOMO-3 → LUMO (79%) |               |        |

**Table S25.** TD-DFT calculated electronic transitions for **6b** along with their corresponding excitation energies and oscillator strengths.

| Compound           | Spin State     | Transition Configuration | Excitation Energy (nm, eV) | Oscillator Strength |
|--------------------|----------------|--------------------------|----------------------------|---------------------|
| <b>6b</b>          | S <sub>1</sub> | HOMO → LUMO (99%)        | 549.33 (2.26)              | 0.0485              |
|                    | S <sub>2</sub> | HOMO → LUMO+1 (93%)      | 448.09 (2.77)              | 0.1378              |
|                    |                | HOMO-1 → LUMO (5%)       |                            |                     |
|                    | S <sub>3</sub> | HOMO-1 → LUMO (86%)      | 387.54 (3.20)              | 0.2812              |
|                    |                | HOMO → LUMO+1 (4%)       |                            |                     |
|                    |                | HOMO → LUMO+2 (6%)       |                            |                     |
|                    | S <sub>4</sub> | HOMO-2 → LUMO (92%)      | 357.98 (3.46)              | 0.0526              |
|                    |                | HOMO-2 → LUMO+1 (4%)     |                            |                     |
|                    | S <sub>5</sub> | HOMO-3 → LUMO (58%)      | 341.72 (3.63)              | 0.0179              |
|                    |                | HOMO-1 → LUMO+1 (31%)    |                            |                     |
| HOMO → LUMO+2 (6%) |                |                          |                            |                     |

**Table S26.** TD-DFT calculated electronic transitions for **6d** along with their corresponding excitation energies and oscillator strengths.

| Compound             | Spin State     | Transition Configuration | Excitation Energy (nm, eV) | Oscillator Strength |
|----------------------|----------------|--------------------------|----------------------------|---------------------|
| <b>6d</b>            | S <sub>1</sub> | HOMO → LUMO (96%)        | 389.28 (3.18)              | 0.2150              |
|                      | S <sub>2</sub> | HOMO-1 → LUMO (90%)      | 351.95 (3.52)              | 0.0125              |
|                      |                | HOMO → LUMO+2 (4%)       |                            |                     |
|                      | S <sub>3</sub> | HOMO-2 → LUMO (96%)      | 346.91 (3.57)              | 0.0986              |
|                      | S <sub>4</sub> | HOMO-4 → LUMO (15%)      | 326.74 (3.79)              | 0.0003              |
|                      |                | HOMO-3 → LUMO (80%)      |                            |                     |
|                      | S <sub>5</sub> | HOMO-5 → LUMO (47%)      | 321.42 (3.86)              | 0.0181              |
|                      |                | HOMO-4 → LUMO (42%)      |                            |                     |
| HOMO-3 → LUMO+1 (6%) |                |                          |                            |                     |

**Table S27.** TD-DFT calculated electronic transitions for **E-7a** along with their corresponding excitation energies and oscillator strengths.

| Compound    | Spin State     | Transition Configuration | Excitation Energy (nm, eV) | Oscillator Strength |
|-------------|----------------|--------------------------|----------------------------|---------------------|
| <b>E-7a</b> | S <sub>1</sub> | HOMO → LUMO (94%)        | 399.25 (3.11)              | 0.2711              |
|             |                | HOMO → LUMO+1 (3%)       |                            |                     |
|             | S <sub>2</sub> | HOMO-1 → LUMO (83%)      | 371.70 (3.34)              | 0.0740              |
|             |                | HOMO → LUMO+1 (13%)      |                            |                     |
|             | S <sub>3</sub> | HOMO-2 → LUMO (90%)      | 351.15 (3.53)              | 0.0627              |
|             |                | HOMO-2 → LUMO+1 (2%)     |                            |                     |
|             |                | HOMO → LUMO+1 (6%)       |                            |                     |
|             | S <sub>4</sub> | HOMO-4 → LUMO (15%)      | 333.97 (3.71)              | 0.0047              |

|  |                |                      |               |        |
|--|----------------|----------------------|---------------|--------|
|  |                | HOMO-3 → LUMO (77%)  | 327.29 (3.79) | 0.0232 |
|  |                | HOMO-5 → LUMO (3%)   |               |        |
|  | S <sub>5</sub> | HOMO-4 → LUMO (69%)  |               |        |
|  |                | HOMO-3 → LUMO (16%)  |               |        |
|  |                | HOMO-5 → LUMO (6%)   |               |        |
|  |                | HOMO-1 → LUMO+1 (4%) |               |        |

**Table S28.** TD-DFT calculated electronic transitions for **Z-7a** along with their corresponding excitation energies and oscillator strengths.

| Compound       | Spin State          | Transition Configuration | Excitation Energy (nm, eV) | Oscillator Strength |
|----------------|---------------------|--------------------------|----------------------------|---------------------|
| <b>Z-7a</b>    | S <sub>1</sub>      | HOMO-1 → LUMO (16%)      | 363.64 (3.41)              | 0.2924              |
|                |                     | HOMO → LUMO (77%)        |                            |                     |
|                |                     | HOMO-3 → LUMO (3%)       |                            |                     |
|                | S <sub>2</sub>      | HOMO-1 → LUMO (76%)      | 360.57 (3.44)              | 0.0627              |
|                |                     | HOMO → LUMO (15%)        |                            |                     |
|                |                     | HOMO-2 → LUMO (2%)       |                            |                     |
|                |                     | HOMO → LUMO+1 (5%)       |                            |                     |
|                | S <sub>3</sub>      | HOMO-2 → LUMO (27%)      | 338.00 (3.67)              | 0.0587              |
|                |                     | HOMO → LUMO+1 (68%)      |                            |                     |
|                | S <sub>4</sub>      | HOMO-2 → LUMO (66%)      | 332.64 (3.73)              | 0.0705              |
|                |                     | HOMO → LUMO+1 (23%)      |                            |                     |
|                |                     | HOMO-1 → LUMO (3%)       |                            |                     |
| S <sub>5</sub> | HOMO-4 → LUMO (16%) | 315.86 (3.93)            | 0.0159                     |                     |
|                | HOMO-3 → LUMO (77%) |                          |                            |                     |

**Table S29.** TD-DFT calculated electronic transitions for **E-8a** along with their corresponding excitation energies and oscillator strengths.

| Compound             | Spin State     | Transition Configuration | Excitation Energy (nm, eV) | Oscillator Strength |
|----------------------|----------------|--------------------------|----------------------------|---------------------|
| <b>E-8a</b>          | S <sub>1</sub> | HOMO → LUMO (31%)        | 366.77 (3.38)              | 0.2379              |
|                      |                | HOMO → LUMO+1 (62%)      |                            |                     |
|                      | S <sub>2</sub> | HOMO → LUMO (65%)        | 357.13 (3.47)              | 0.2162              |
|                      |                | HOMO → LUMO+1 (28%)      |                            |                     |
|                      |                | HOMO-2 → LUMO (3%)       |                            |                     |
|                      | S <sub>3</sub> | HOMO-2 → LUMO (25%)      | 340.31 (3.64)              | 0.0883              |
|                      |                | HOMO-1 → LUMO (61%)      |                            |                     |
|                      |                | HOMO-2 → LUMO+1 (4%)     |                            |                     |
|                      |                | HOMO-1 → LUMO+1 (7%)     |                            |                     |
|                      | S <sub>4</sub> | HOMO-3 → LUMO (22%)      | 329.50 (3.76)              | 0.2213              |
|                      |                | HOMO-2 → LUMO (49%)      |                            |                     |
|                      |                | HOMO-1 → LUMO (18%)      |                            |                     |
|                      |                | HOMO-4 → LUMO (2%)       |                            |                     |
|                      |                | HOMO-3 → LUMO+1 (3%)     |                            |                     |
|                      | S <sub>5</sub> | HOMO-4 → LUMO (16%)      | 321.93 (3.85)              | 0.0972              |
| HOMO-3 → LUMO (58%)  |                |                          |                            |                     |
| HOMO-4 → LUMO+1 (2%) |                |                          |                            |                     |

|  |  |                      |  |  |
|--|--|----------------------|--|--|
|  |  | HOMO-3 → LUMO+1 (6%) |  |  |
|  |  | HOMO-2 → LUMO (9%)   |  |  |
|  |  | HOMO-1 → LUMO (5%)   |  |  |

**Table S30.** TD-DFT calculated electronic transitions for **Z-8a** along with their corresponding excitation energies and oscillator strengths.

| Compound             | Spin State     | Transition Configuration | Excitation Energy (nm, eV) | Oscillator Strength |
|----------------------|----------------|--------------------------|----------------------------|---------------------|
| <b>Z-8a</b>          | S <sub>1</sub> | HOMO → LUMO (74%)        | 354.65 (3.50)              | 0.2437              |
|                      |                | HOMO → LUMO+1 (26%)      |                            |                     |
|                      |                | HOMO-4 → LUMO (3%)       |                            |                     |
|                      |                | HOMO-1 → LUMO (3%)       |                            |                     |
|                      | S <sub>2</sub> | HOMO-1 → LUMO (27%)      | 343.82 (3.61)              | 0.0819              |
|                      |                | HOMO → LUMO (17%)        |                            |                     |
|                      |                | HOMO → LUMO+1 (48%)      |                            |                     |
|                      |                | HOMO-2 → LUMO (4%)       |                            |                     |
|                      | S <sub>3</sub> | HOMO-2 → LUMO (10%)      | 341.75 (3.63)              | 0.1334              |
|                      |                | HOMO-1 → LUMO (58%)      |                            |                     |
|                      |                | HOMO → LUMO+1 (22%)      |                            |                     |
|                      |                | HOMO-4 → LUMO (3%)       |                            |                     |
|                      |                | HOMO-1 → LUMO+1 (4%)     |                            |                     |
|                      | S <sub>4</sub> | HOMO-2 → LUMO (74%)      | 330.18 (3.76)              | 0.0988              |
|                      |                | HOMO-3 → LUMO (7%)       |                            |                     |
|                      |                | HOMO-1 → LUMO (2%)       |                            |                     |
|                      |                | HOMO → LUMO (6%)         |                            |                     |
|                      |                | HOMO → LUMO+1 (5%)       |                            |                     |
|                      | S <sub>5</sub> | HOMO-3 → LUMO (84%)      | 323.77 (3.83)              | 0.0585              |
|                      |                | HOMO-4 → LUMO (3%)       |                            |                     |
| HOMO-3 → LUMO+1 (3%) |                |                          |                            |                     |
| HOMO-2 → LUMO (5%)   |                |                          |                            |                     |

**Table S31.** TD-DFT calculated electronic transitions for **E-9a** along with their corresponding excitation energies and oscillator strengths.

| Compound    | Spin State     | Transition Configuration | Excitation Energy (nm, eV) | Oscillator Strength |
|-------------|----------------|--------------------------|----------------------------|---------------------|
| <b>E-9a</b> | S <sub>1</sub> | HOMO → LUMO (96%)        | 467.76 (2.65)              | 0.0858              |
|             |                | HOMO → LUMO+1 (3%)       |                            |                     |
|             | S <sub>2</sub> | HOMO → LUMO+1 (86%)      | 355.61 (3.49)              | 0.6315              |
|             |                | HOMO-3 → LUMO (3%)       |                            |                     |
|             |                | HOMO-1 → LUMO (6%)       |                            |                     |
|             |                | HOMO → LUMO (3%)         |                            |                     |
|             | S <sub>3</sub> | HOMO-1 → LUMO (88%)      | 343.00 (3.61)              | 0.2391              |
|             |                | HOMO-2 → LUMO (4%)       |                            |                     |
|             |                | HOMO → LUMO+1 (5%)       |                            |                     |
|             | S <sub>4</sub> | HOMO-3 → LUMO (27%)      | 327.08 (3.79)              | 0.0667              |
|             |                | HOMO-2 → LUMO (65%)      |                            |                     |
|             | S <sub>5</sub> | HOMO-4 → LUMO (88%)      | 318.46 (3.89)              | 0.0233              |

|  |  |                    |  |  |
|--|--|--------------------|--|--|
|  |  | HOMO-3 → LUMO (5%) |  |  |
|  |  | HOMO-2 → LUMO (4%) |  |  |

**Table S32.** TD-DFT calculated electronic transitions for **Z-9a** along with their corresponding excitation energies and oscillator strengths.

| Compound       | Spin State          | Transition Configuration | Excitation Energy (nm, eV) | Oscillator Strength |
|----------------|---------------------|--------------------------|----------------------------|---------------------|
| <b>Z-9a</b>    | S <sub>1</sub>      | HOMO → LUMO (98%)        | 438.35 (2.83)              | 0.0410              |
|                | S <sub>2</sub>      | HOMO → LUMO (89%)        | 351.00 (3.53)              | 0.2914              |
|                |                     | HOMO-1 → LUMO (8%)       |                            |                     |
|                | S <sub>3</sub>      | HOMO-1 → LUMO (86%)      | 343.28 (3.61)              | 0.1526              |
|                |                     | HOMO-2 → LUMO (4%)       |                            |                     |
|                |                     | HOMO → LUMO+1 (67)       |                            |                     |
| S <sub>4</sub> | HOMO-3 → LUMO (95%) | 322.19 (3.85)            | 0.0307                     |                     |
| S <sub>5</sub> | HOMO-4 → LUMO (95%) | 315.33 (3.93)            | 0.0573                     |                     |

**Table S33.** Primary orbitals which contribute to the calculated transitions of **E-1a** (iso = 0.03). Most H-atoms have been omitted for clarity.

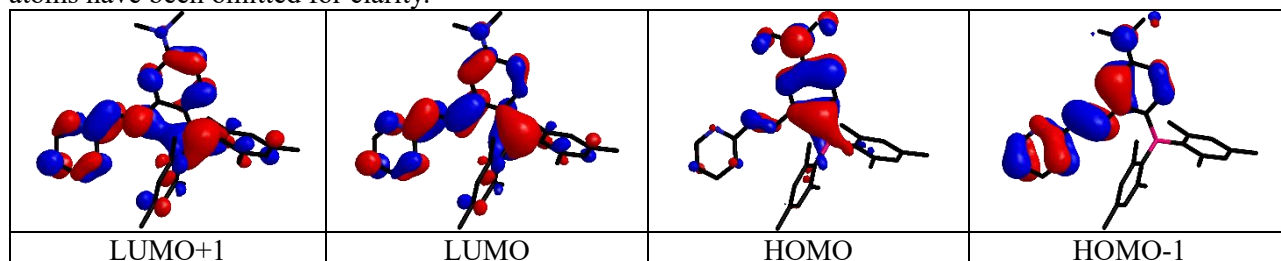

**Table S34.** Primary orbitals which contribute to the calculated transitions of **Z-1a** (iso = 0.03). Most H-atoms have been omitted for clarity.

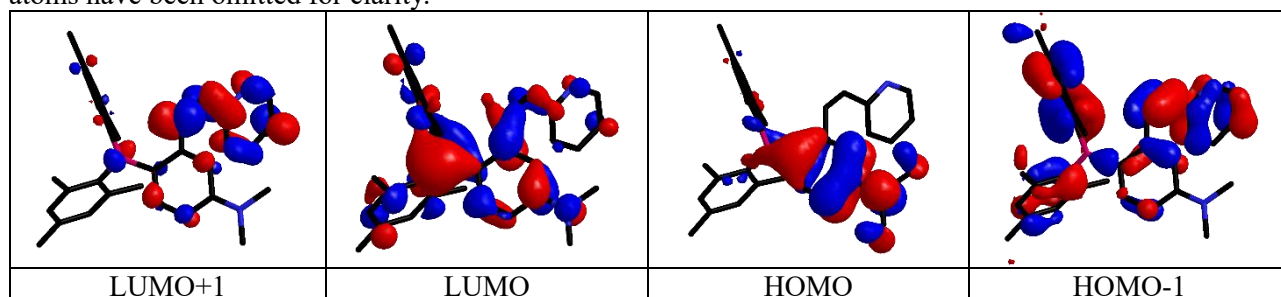

**Table S35.** Primary orbitals which contribute to the calculated transitions of **1b** (iso = 0.03). Most H-atoms have been omitted for clarity.

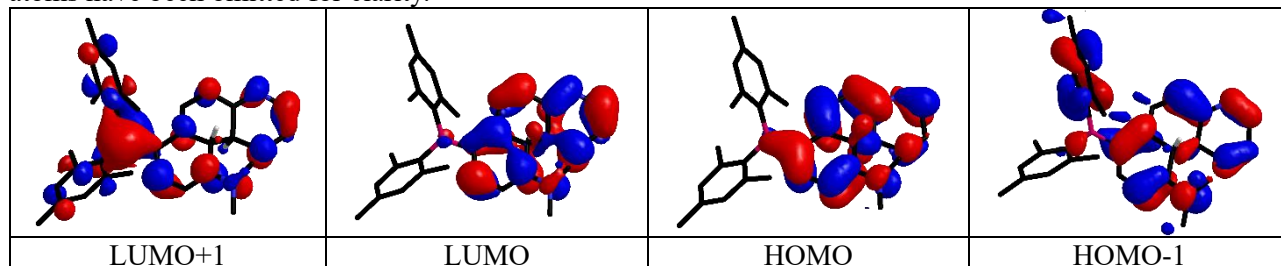



**Table S36.** Primary orbitals which contribute to the calculated transitions of **1c** (iso = 0.03). Most H-atoms have been omitted for clarity.

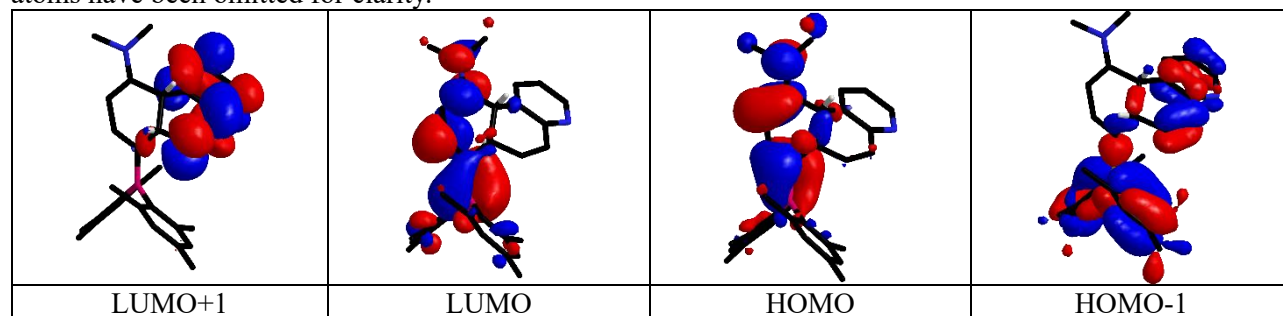

**Table S37.** Primary orbitals which contribute to the calculated transitions of **1d** (iso = 0.03). Most H-atoms have been omitted for clarity.

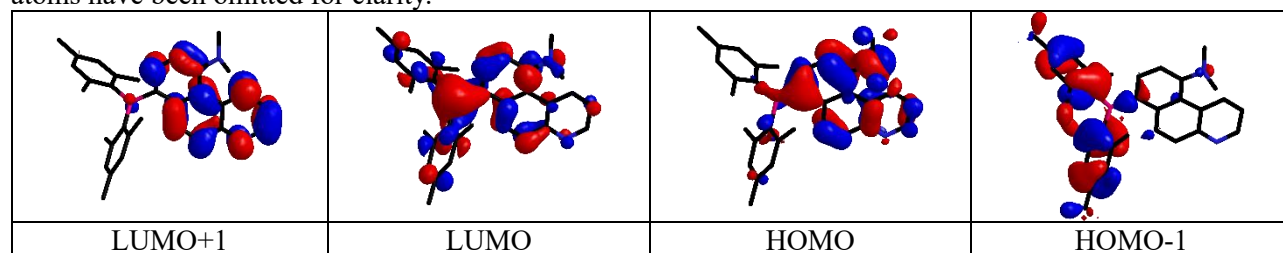

**Table S38.** Primary orbitals which contribute to the calculated transitions of **E-2a** (iso = 0.03). Most H-atoms have been omitted for clarity.

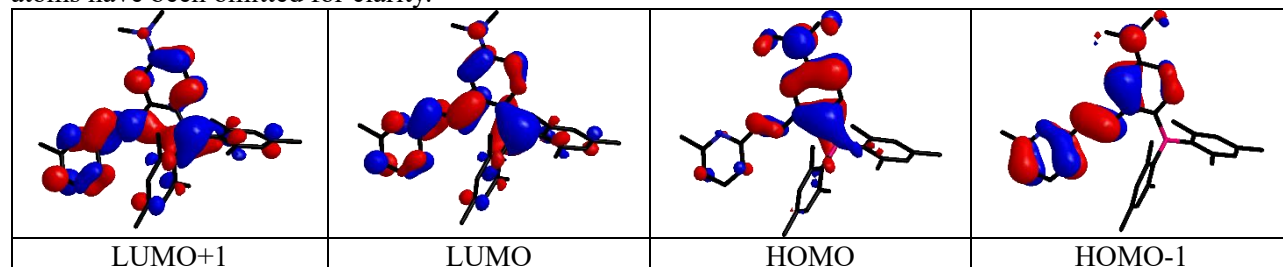

**Table S39.** Primary orbitals which contribute to the calculated transitions of **Z-2a** (iso = 0.03). Most H-atoms have been omitted for clarity.

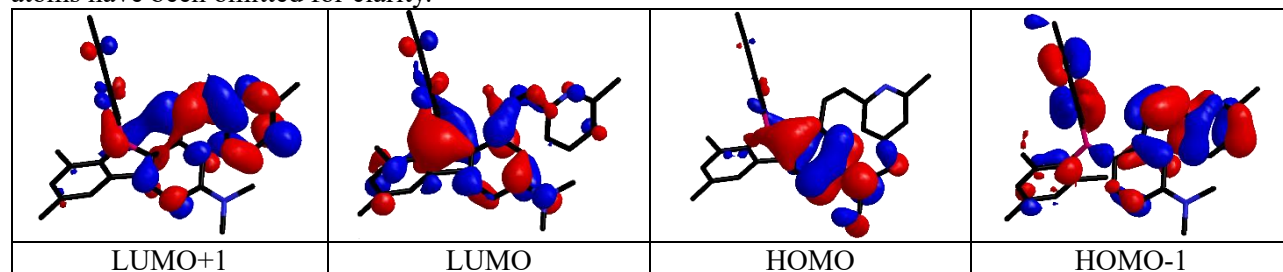

**Table S40.** Primary orbitals which contribute to the calculated transitions of **2b** (iso = 0.03). Most H-atoms have been omitted for clarity.

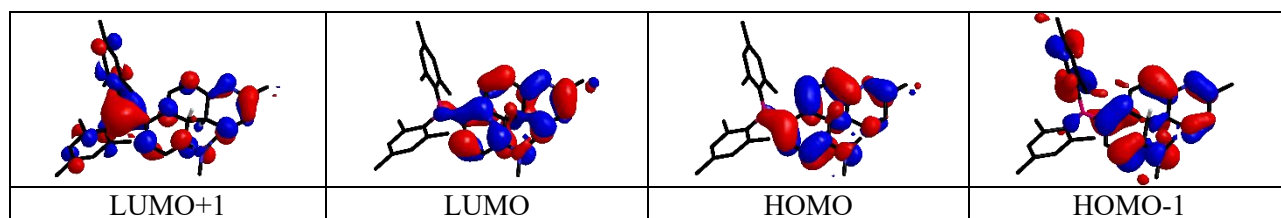

**Table S41.** Primary orbitals which contribute to the calculated transitions of **2c** (iso = 0.03). Most H-atoms have been omitted for clarity.

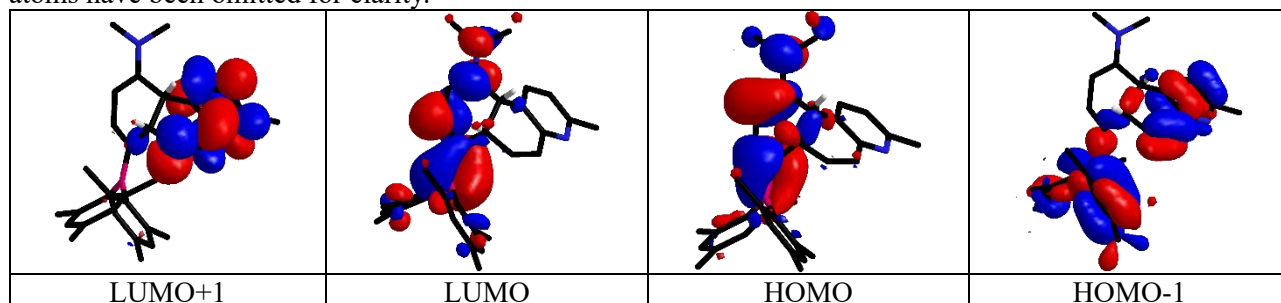

**Table S42.** Primary orbitals which contribute to the calculated transitions of **2d** (iso = 0.03). Most H-atoms have been omitted for clarity.

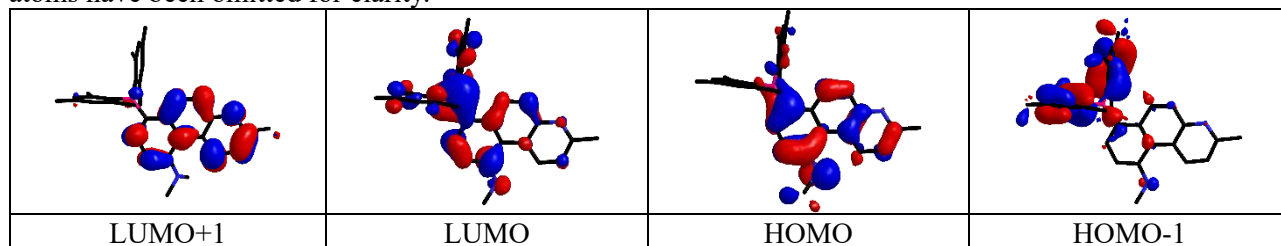

**Table S43.** Primary orbitals which contribute to the calculated transitions of **E-3a** (iso = 0.03). Most H-atoms have been omitted for clarity.

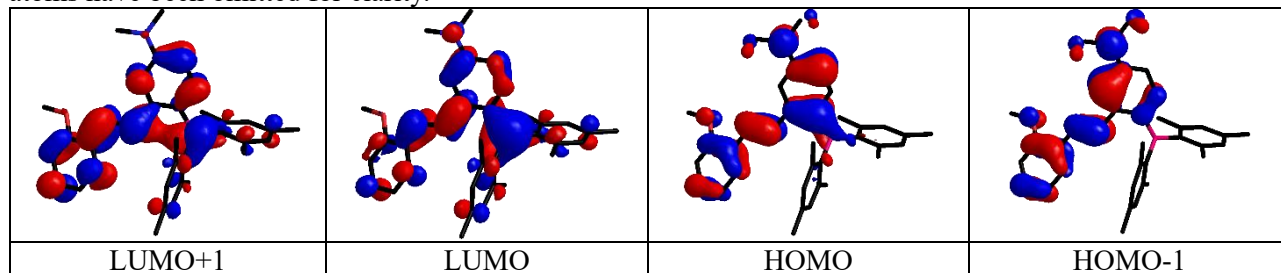

**Table S44.** Primary orbitals which contribute to the calculated transitions of **Z-3a** (iso = 0.03). Most H-atoms have been omitted for clarity.

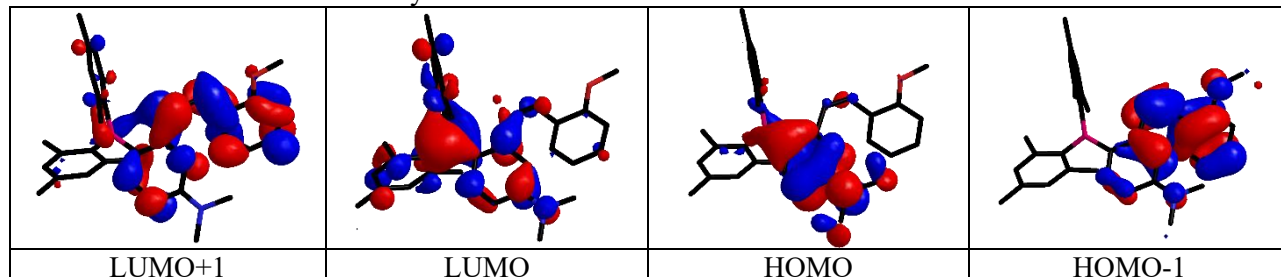

**Table S45.** Primary orbitals which contribute to the calculated transitions of **3b** (iso = 0.03). Most H-atoms have been omitted for clarity.

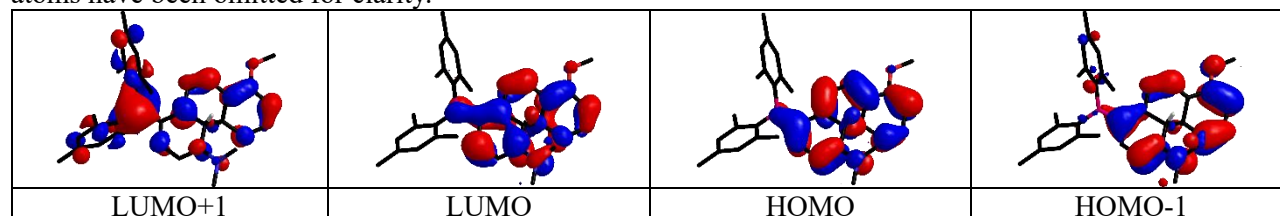

**Table S46.** Primary orbitals which contribute to the calculated transitions of **3c** (iso = 0.03). Most H-atoms have been omitted for clarity.

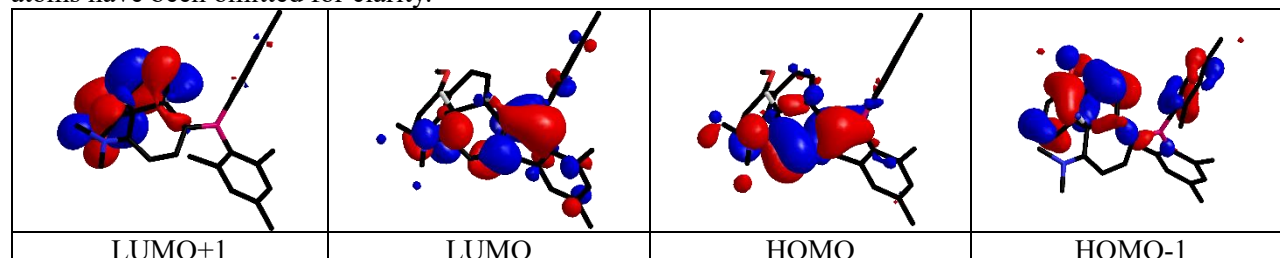

**Table S47.** Primary orbitals which contribute to the calculated transitions of **3d** (iso = 0.03). Most H-atoms have been omitted for clarity.

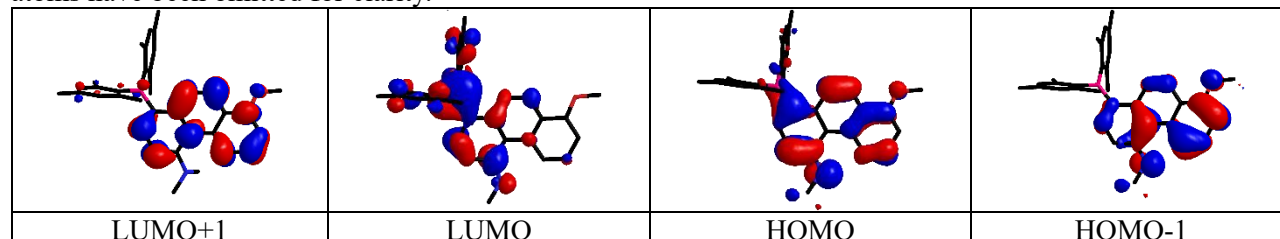

**Table S48.** Primary orbitals which contribute to the calculated transitions of **E-4a** (iso = 0.03). Most H-atoms have been omitted for clarity.

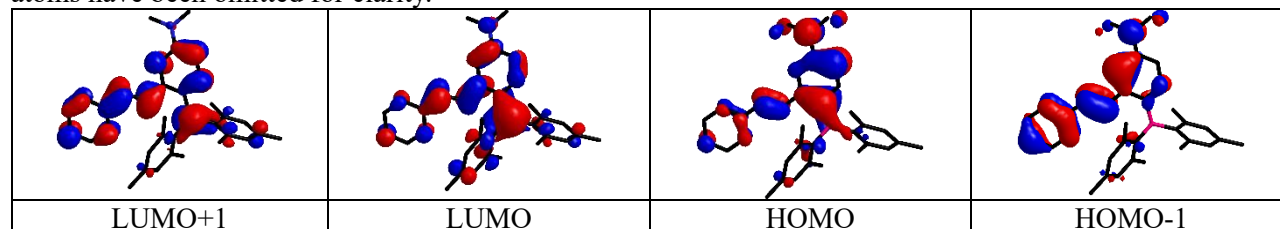

**Table S49.** Primary orbitals which contribute to the calculated transitions of **Z-4a** (iso = 0.03). Most H-atoms have been omitted for clarity.

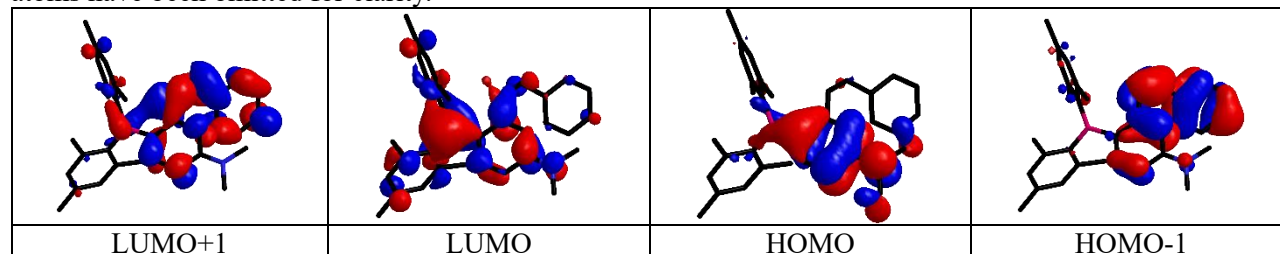

**Table S50.** Primary orbitals which contribute to the calculated transitions of **4b** (iso = 0.03). Most H-atoms have been omitted for clarity.

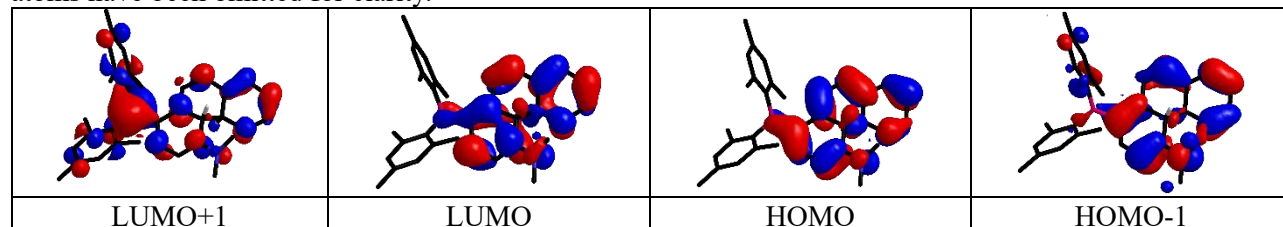

**Table S51.** Primary orbitals which contribute to the calculated transitions of **4c** (iso = 0.03). Most H-atoms have been omitted for clarity.

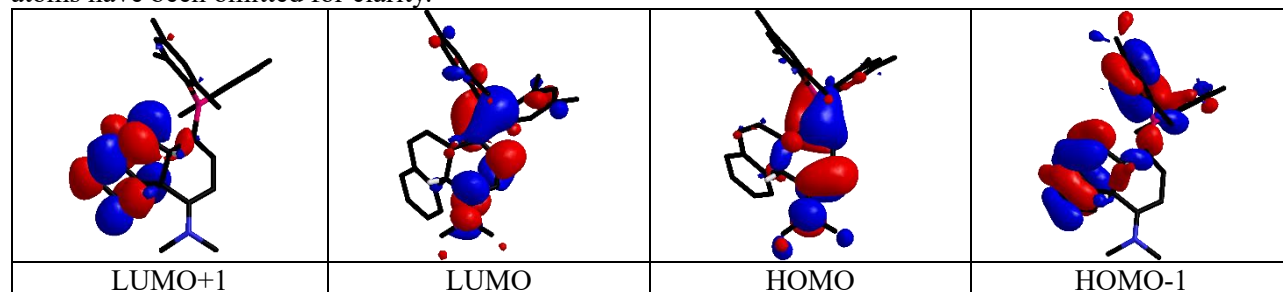

**Table S52.** Primary orbitals which contribute to the calculated transitions of **4d** (iso = 0.03). Most H-atoms have been omitted for clarity.

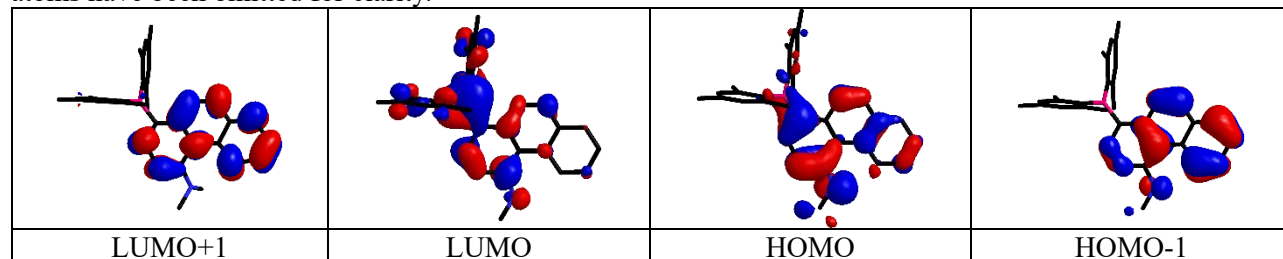

**Table S53.** Primary orbitals which contribute to the calculated transitions of **E-5a** (iso = 0.03). Most H-atoms have been omitted for clarity.

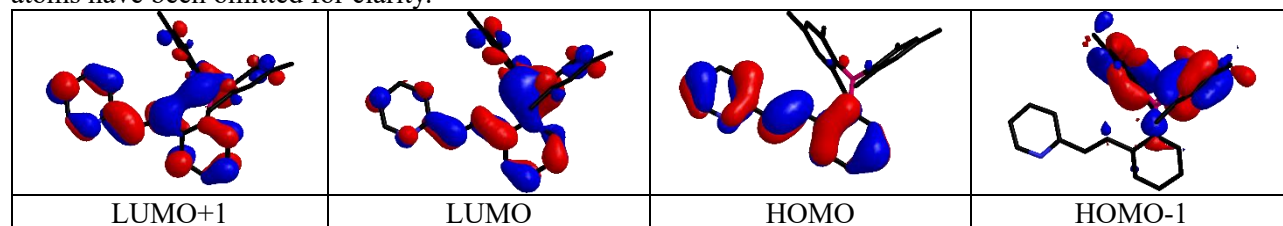

**Table S54.** Primary orbitals which contribute to the calculated transitions of **Z-5a** (iso = 0.03). Most H-atoms have been omitted for clarity.

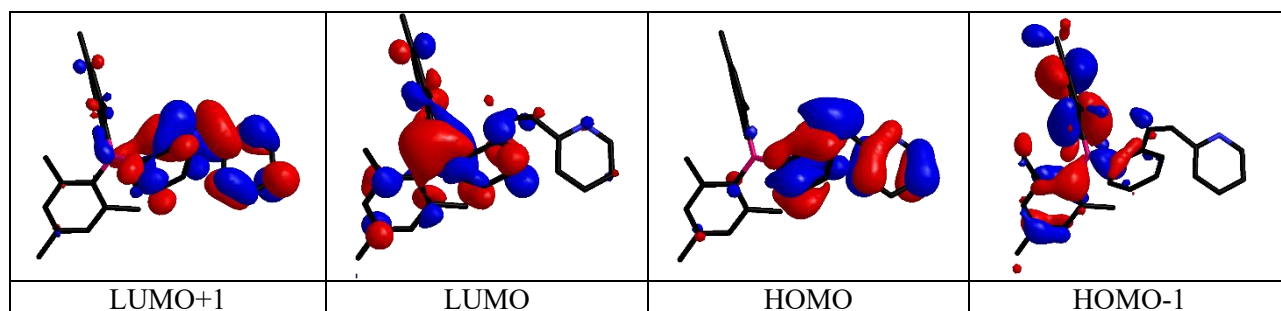

**Table S55.** Primary orbitals which contribute to the calculated transitions of *E*-**6a** (iso = 0.03). Most H-atoms have been omitted for clarity.

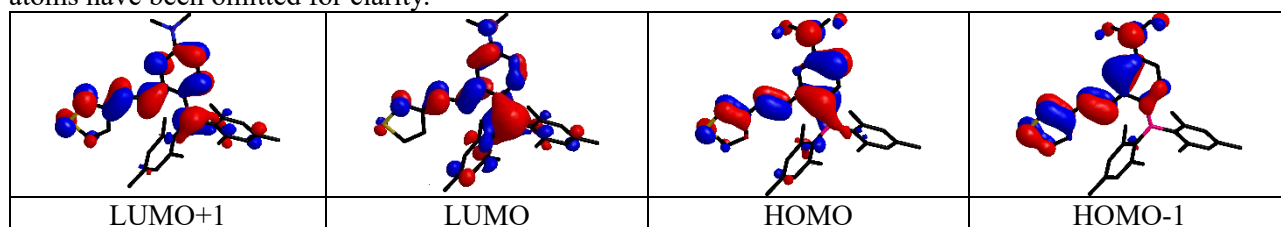

**Table S56.** Primary orbitals which contribute to the calculated transitions of *Z*-**6a** (iso = 0.03). Most H-atoms have been omitted for clarity.

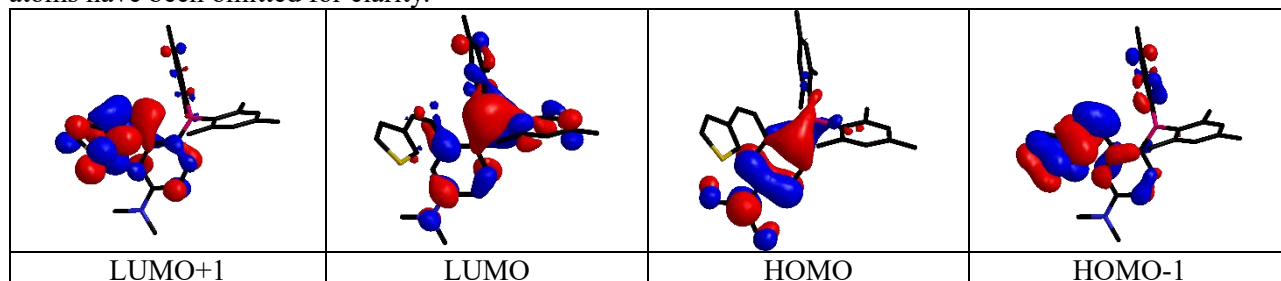

**Table S57.** Primary orbitals which contribute to the calculated transitions of **6b** (iso = 0.03). Most H-atoms have been omitted for clarity.

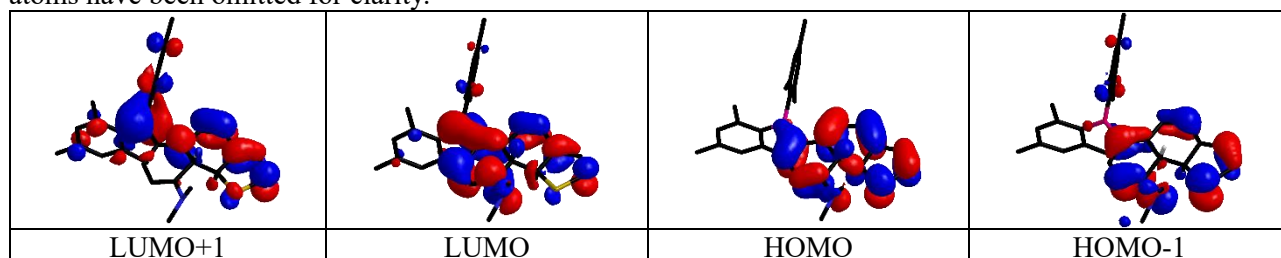

**Table S58.** Primary orbitals which contribute to the calculated transitions of **6d** (iso = 0.03). Most H-atoms have been omitted for clarity.

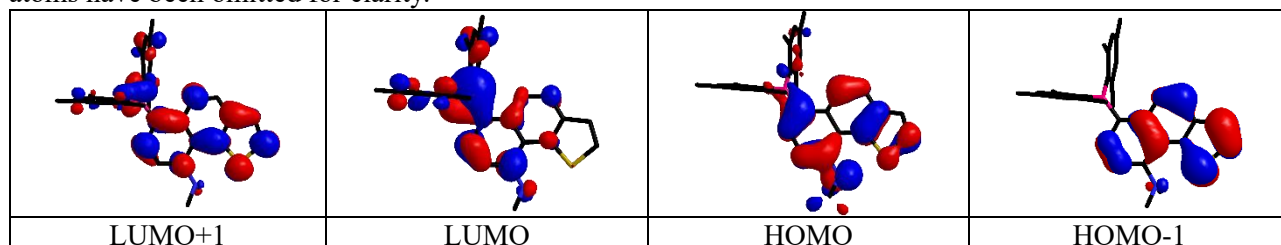

**Table S59.** Primary orbitals which contribute to the calculated transitions of *E-7a* (iso = 0.03). Most H-atoms have been omitted for clarity.

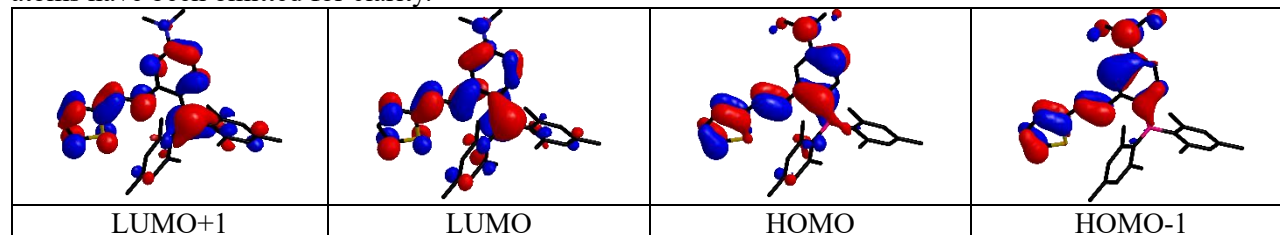

**Table S60.** Primary orbitals which contribute to the calculated transitions of *Z-7a* (iso = 0.03). Most H-atoms have been omitted for clarity.

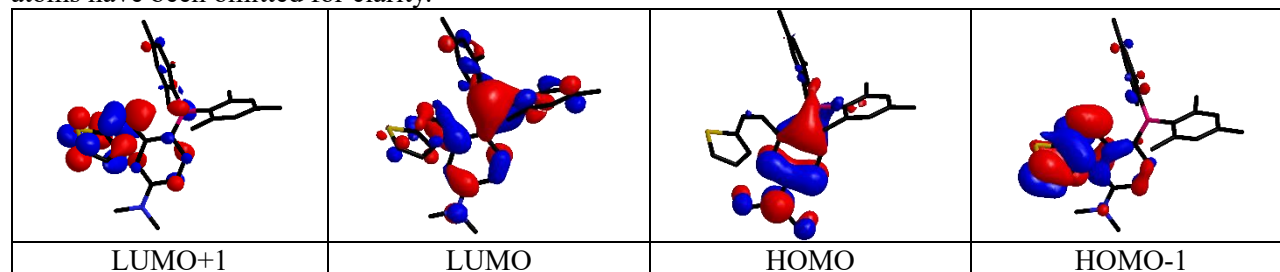

**Table S61.** Primary orbitals which contribute to the calculated transitions of *E-8a* (iso = 0.03). Most H-atoms have been omitted for clarity.

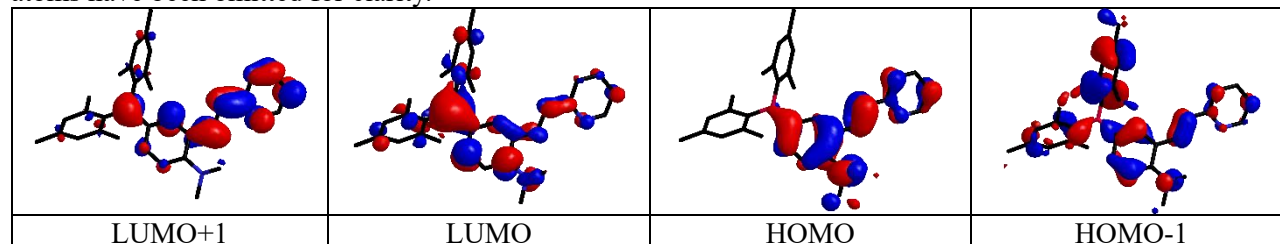

**Table S62.** Primary orbitals which contribute to the calculated transitions of *Z-8a* (iso = 0.03). Most H-atoms have been omitted for clarity.

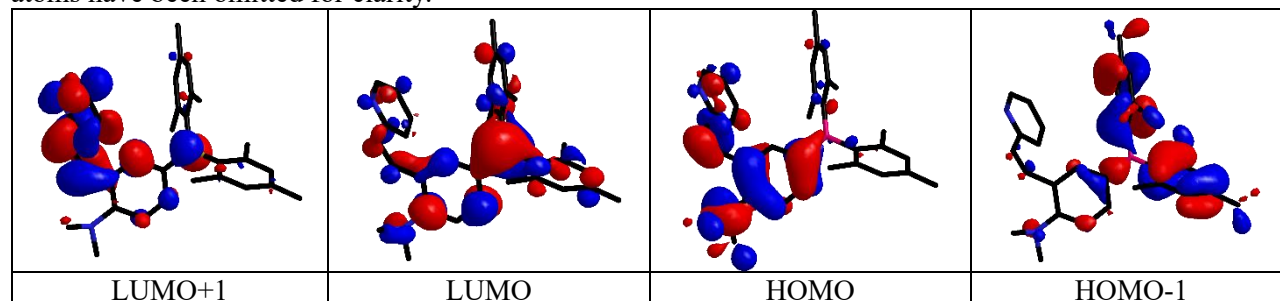

**Table S63.** Primary orbitals which contribute to the calculated transitions of *E-9a* (iso = 0.03). Most H-atoms have been omitted for clarity.

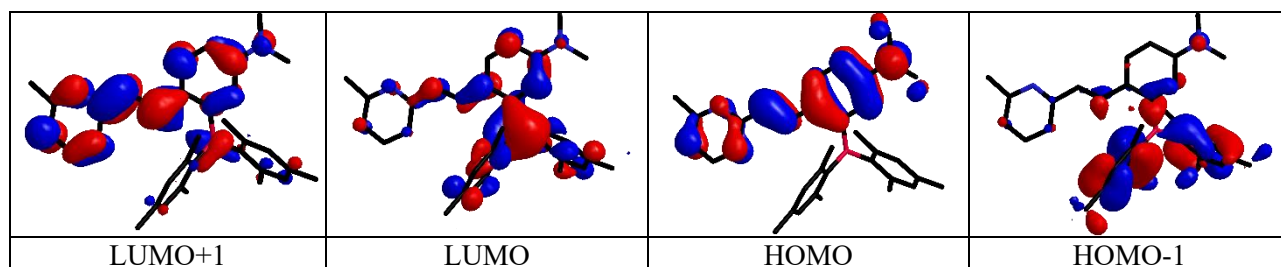

**Table S64.** Primary orbitals which contribute to the calculated transitions of **Z-9a** (iso = 0.03). Most H-atoms have been omitted for clarity.

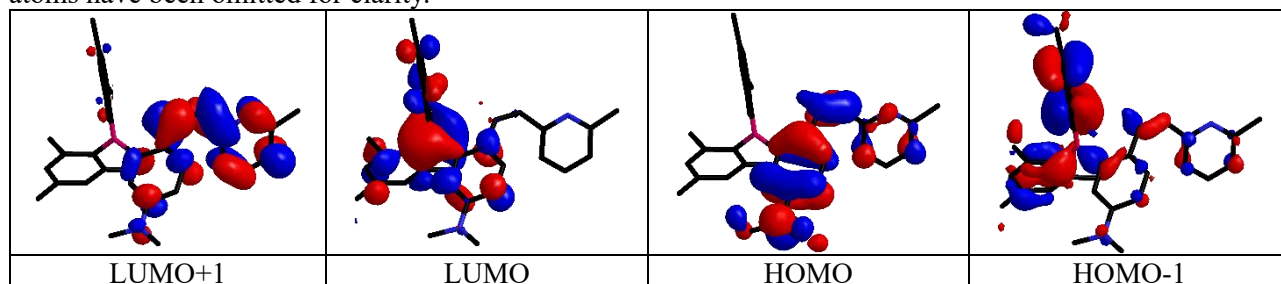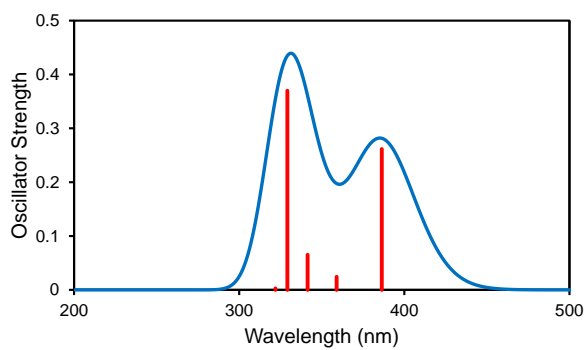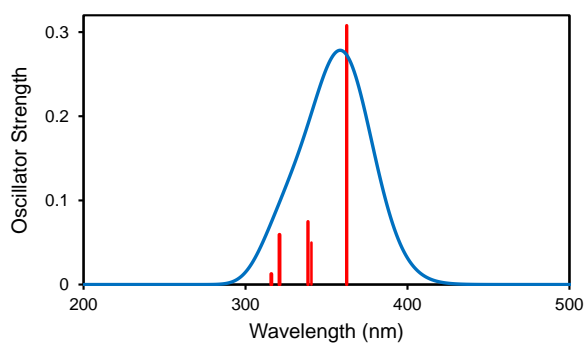

**Figure S135.** Predicted UV/Vis spectra of **E-1a** (left) and **Z-1a** (right) for their first five excited states.<sup>3</sup>

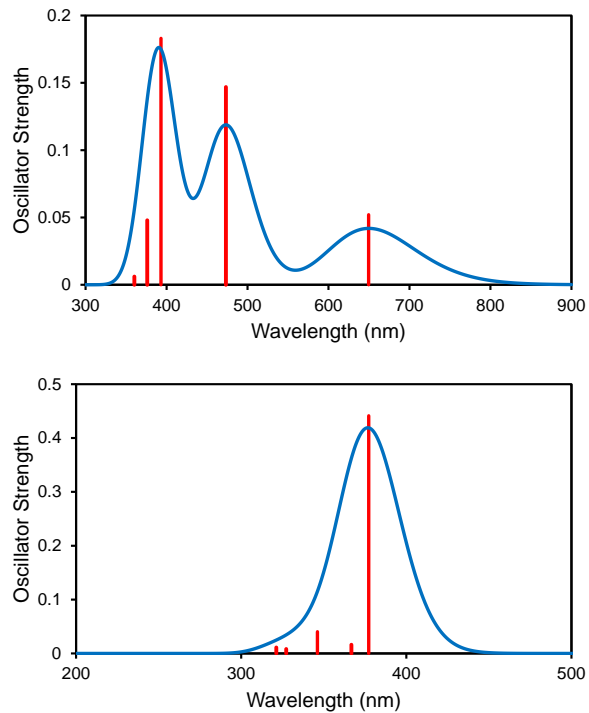

**Figure S136.** Predicted UV/Vis spectra of **1b** (left) and **1c** (right) for their first five excited states.<sup>3</sup>

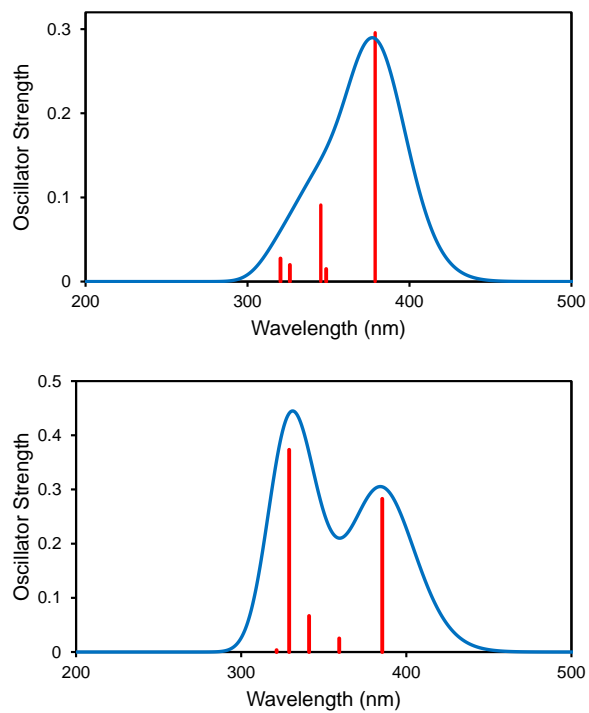

**Figure S137.** Predicted UV/Vis spectra of **1d** (left) and **E-2a** (right) for their first five excited states.<sup>3</sup>



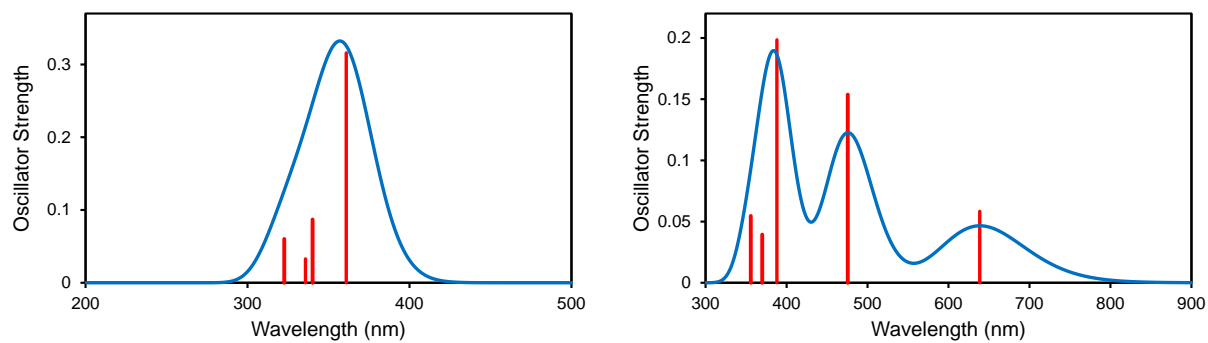

**Figure S138.** Predicted UV/Vis spectra of **Z-2a** (left) and **2b** (right) for their first five excited states.<sup>3</sup>

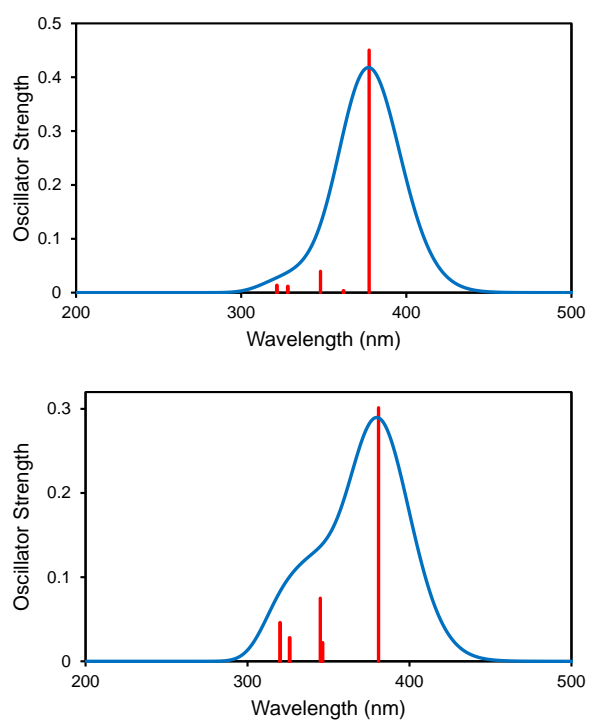

**Figure S139.** Predicted UV/Vis spectra of **2c** (left) and **2d** (right) for their first five excited states.<sup>3</sup>

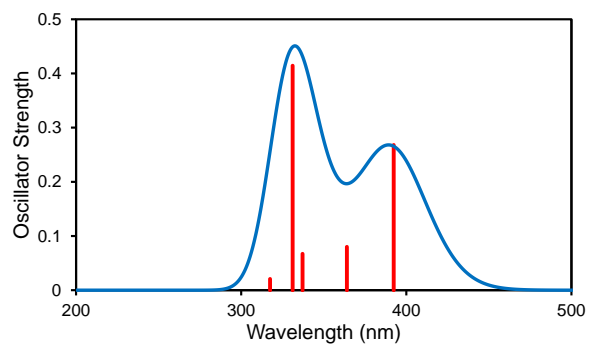

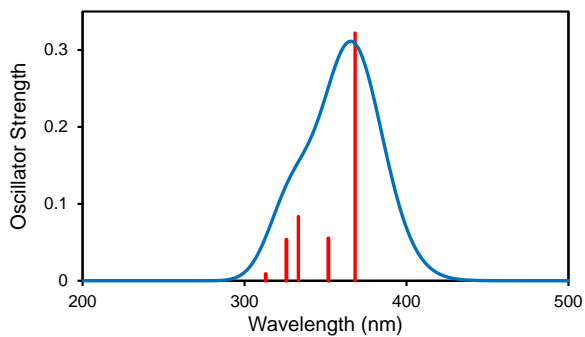

**Figure S140.** Predicted UV/Vis spectra of *E*-3a (left) and *Z*-3a (right) for their first five excited states.<sup>3</sup>

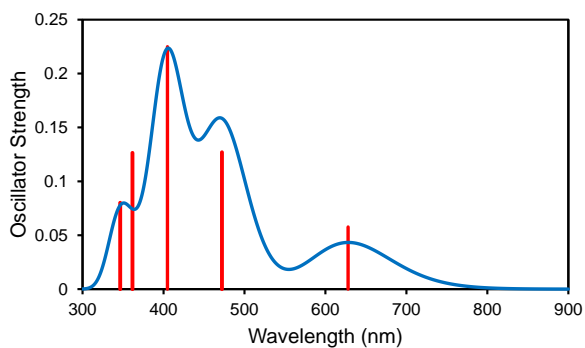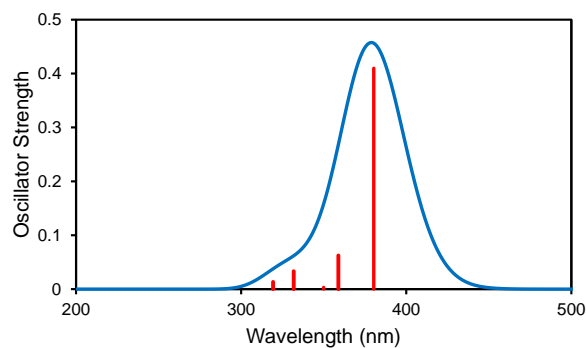

**Figure S141.** Predicted UV/Vis spectra of 3b (left) and 3c (right) for their first five excited states.<sup>3</sup>

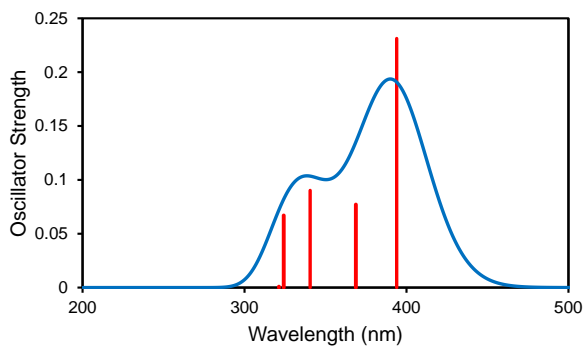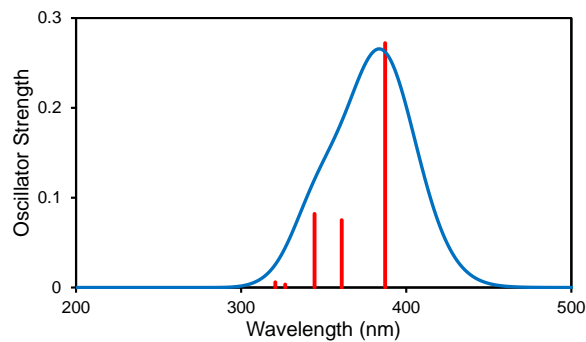

**Figure S142.** Predicted UV/Vis spectra of 3d (left) and *E*-4a (right) for their first five excited states.<sup>3</sup>

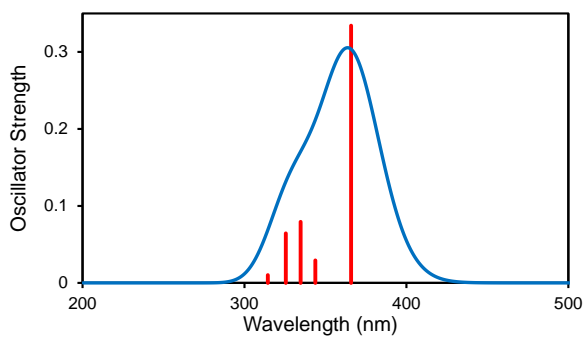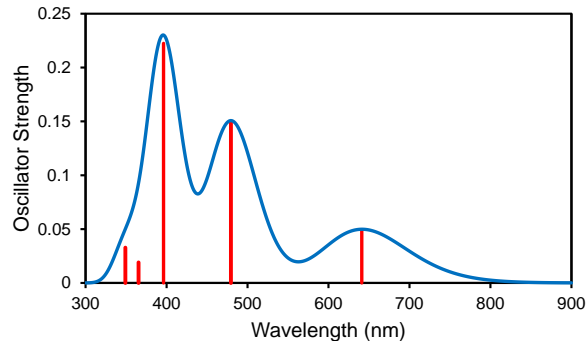

**Figure S143.** Predicted UV/Vis spectra of *Z*-4a (left) and 4b (right) for their first five excited states.<sup>3</sup>

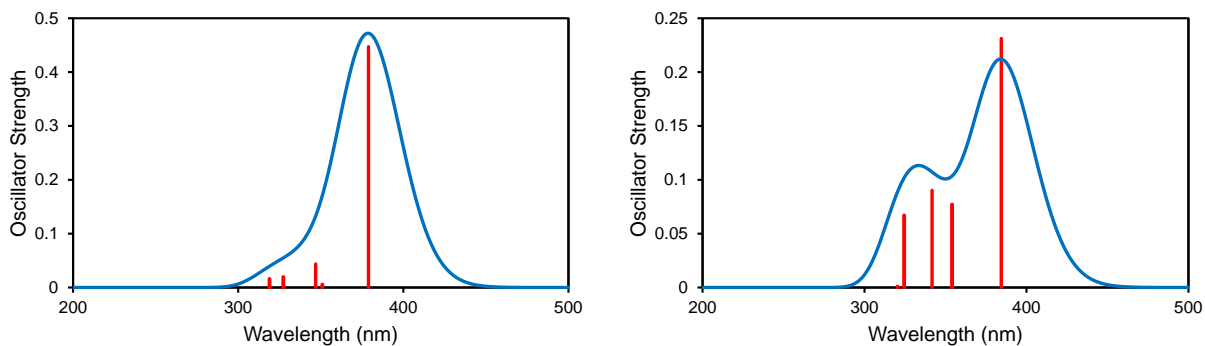

**Figure S144.** Predicted UV/Vis spectra of **4c** (left) and **4d** (right) for their first five excited states.<sup>3</sup>

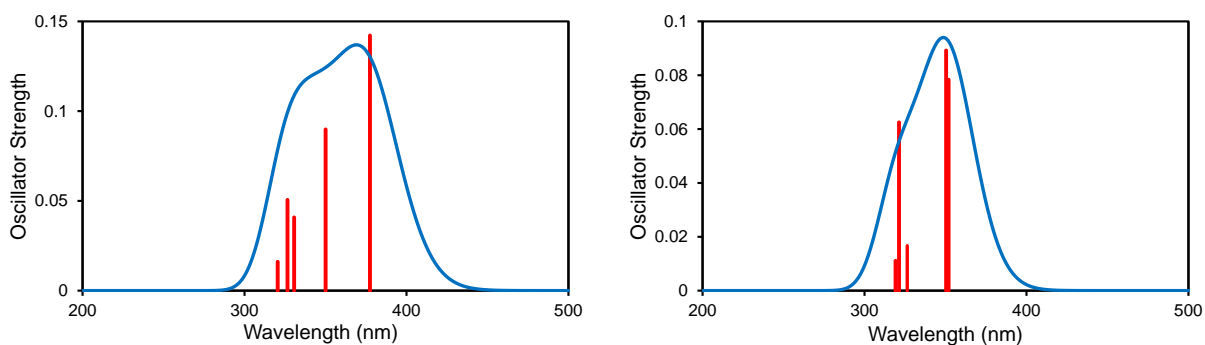

**Figure S145.** Predicted UV/Vis spectra of **E-5a** (left) and **Z-5a** (right) for their first five excited states.<sup>3</sup>

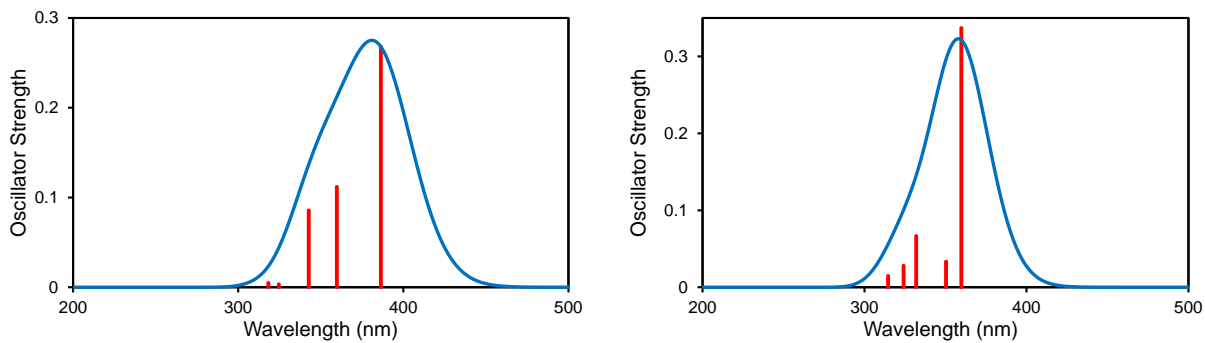

**Figure S146.** Predicted UV/Vis spectra of **E-6a** (left) and **Z-6a** (right) for their first five excited states.<sup>3</sup>

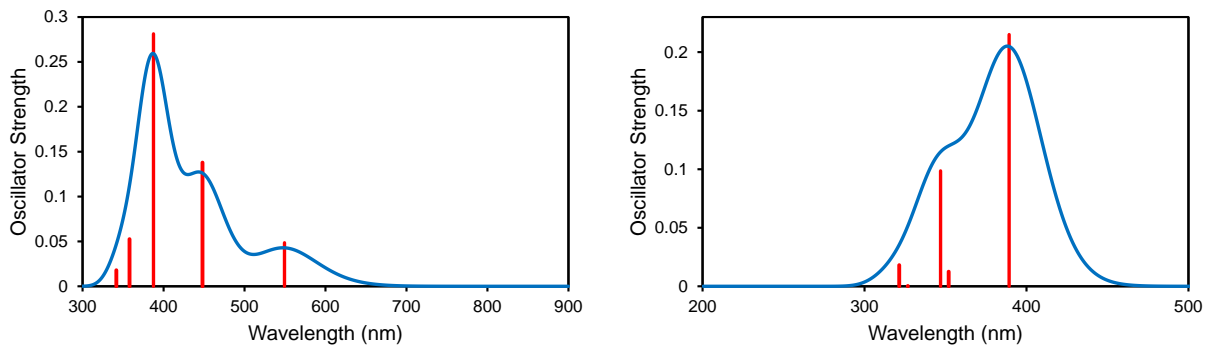

**Figure S147.** Predicted UV/Vis spectra of **6b** (left) and **6d** (right) for their first five excited states.<sup>3</sup>

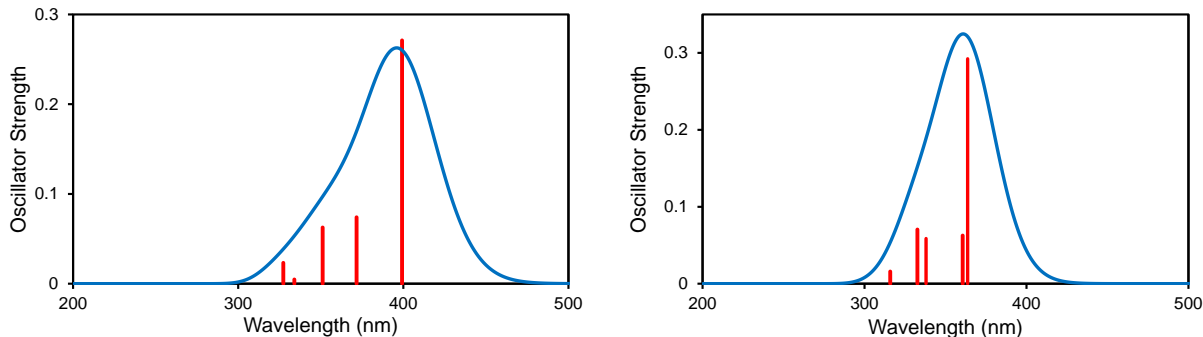

**Figure S148.** Predicted UV/Vis spectra of **E-7a** (left) and **Z-7a** (right) for their first five excited states.<sup>3</sup>

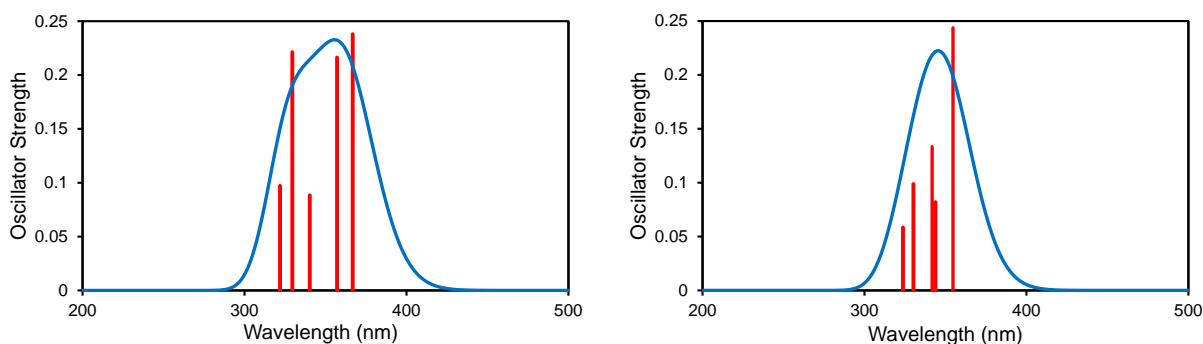

**Figure S149.** Predicted UV/Vis spectra of **E-8a** (left) and **Z-8a** (right) for their first five excited states.<sup>3</sup>

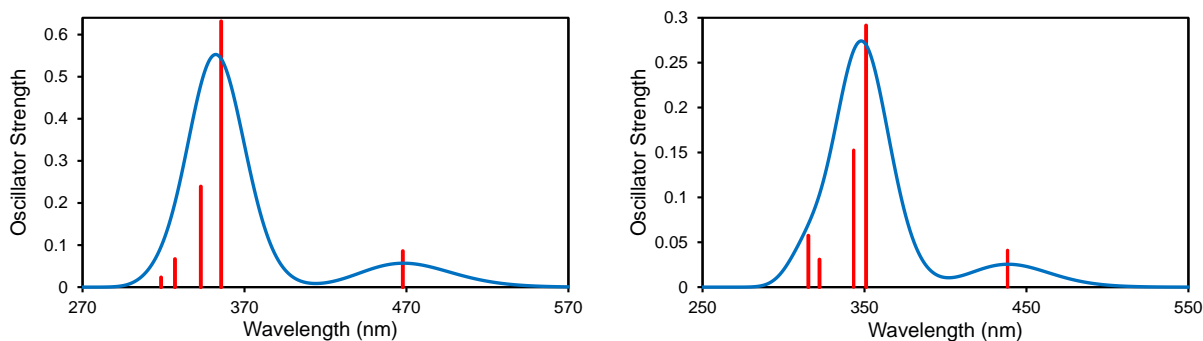

**Figure S150.** Predicted UV/Vis spectra of **E-9a** (left) and **Z-9a** (right) for their first five excited states.<sup>3</sup>

**Table S65.** Energies of optimized structures (kcal/mol).

|          | 1     | 2     | 3     | 4     | 5    | 6     | 7    | 8    | 9    |
|----------|-------|-------|-------|-------|------|-------|------|------|------|
| <i>E</i> | 0.00  | 0.00  | 0.00  | 0.00  | 0.00 | 0.00  | 0.00 | 0.00 | 0.00 |
| <i>Z</i> | 5.18  | 5.13  | 4.78  | 4.99  | 4.17 | 3.11  | 2.81 | 3.37 | 3.99 |
| <b>b</b> | 42.22 | 40.74 | 40.70 | 42.24 | N/A  | 23.88 | N/A  | N/A  | N/A  |
| <b>c</b> | 9.79  | 9.69  | 9.39  | 9.42  | N/A  | N/A   | N/A  | N/A  | N/A  |

**Table S66.** HOMO/LUMO Energies of optimized structures (eV).

|          | 1                | 2                | 3                | 4                | 5                | 6                | 7                | 8                | 9                |
|----------|------------------|------------------|------------------|------------------|------------------|------------------|------------------|------------------|------------------|
| <i>E</i> | -6.73/<br>-6.73/ | -6.71/<br>-6.71/ | -6.63/<br>-6.63/ | -6.70/<br>-6.70/ | -7.29/<br>-7.29/ | -6.68/<br>-6.68/ | -6.67/<br>-6.67/ | -6.85/<br>-6.85/ | -6.28/<br>-6.28/ |

|          |        |        |        |        |        |        |        |        |        |
|----------|--------|--------|--------|--------|--------|--------|--------|--------|--------|
|          | -1.17  | -1.14  | -1.05  | -1.08  | -1.40  | -1.05  | -1.12  | -1.07  | -1.17  |
| <b>Z</b> | -6.77/ | -6.78/ | -6.64/ | -6.71/ | -7.39/ | -6.73/ | -6.73/ | -7.00/ | -6.45/ |
|          | -0.91  | -0.90  | -0.87  | -0.88  | -1.11  | -0.83  | -0.83  | -1.09  | -1.06  |
| <b>b</b> | -6.00/ | -5.94/ | -5.81/ | -5.82/ | N/A    | -6.06/ | N/A    | N/A    | N/A    |
|          | -1.53  | -1.40  | -1.28  | -1.36  |        | -1.28  |        |        |        |
| <b>c</b> | -6.51/ | -6.49/ | -6.37/ | -6.41/ | N/A    | -6.46/ | N/A    | N/A    | N/A    |
|          | -0.91  | -0.89  | -0.78  | -0.83  |        | -0.85  |        |        |        |

## S9: Crystal Structure Data

**Table S67.** Crystal data and structure refinement **1a**.

|                                   |                                                          |                                                       |
|-----------------------------------|----------------------------------------------------------|-------------------------------------------------------|
| Identification code               | <b>1a</b>                                                |                                                       |
| Empirical formula                 | C <sub>39</sub> H <sub>43</sub> B N <sub>2</sub>         |                                                       |
| Formula weight                    | 550.56                                                   |                                                       |
| Temperature                       | 180(2) K                                                 |                                                       |
| Wavelength                        | 0.71073 Å                                                |                                                       |
| Crystal system                    | Triclinic                                                |                                                       |
| Space group                       | P-1                                                      |                                                       |
| Unit cell dimensions              | a = 8.1029(4) Å<br>b = 11.3778(6) Å<br>c = 18.5298(11) Å | α = 87.821(2)°.<br>β = 85.222(2)°.<br>γ = 71.032(2)°. |
| Volume                            | 1609.84(15) Å <sup>3</sup>                               |                                                       |
| Z                                 | 2                                                        |                                                       |
| Density (calculated)              | 1.136 Mg/m <sup>3</sup>                                  |                                                       |
| Absorption coefficient            | 0.065 mm <sup>-1</sup>                                   |                                                       |
| F(000)                            | 592                                                      |                                                       |
| Crystal size                      | 0.200 x 0.165 x 0.100 mm <sup>3</sup>                    |                                                       |
| Theta range for data collection   | 2.202 to 27.876°.                                        |                                                       |
| Index ranges                      | -10 ≤ h ≤ 9, -14 ≤ k ≤ 14, -24 ≤ l ≤ 24                  |                                                       |
| Reflections collected             | 37385                                                    |                                                       |
| Independent reflections           | 7672 [R(int) = 0.0984]                                   |                                                       |
| Completeness to theta = 25.242°   | 99.9 %                                                   |                                                       |
| Absorption correction             | Semi-empirical from equivalents                          |                                                       |
| Max. and min. transmission        | 0.994 and 0.987                                          |                                                       |
| Refinement method                 | Full-matrix least-squares on F <sup>2</sup>              |                                                       |
| Data / restraints / parameters    | 7672 / 0 / 387                                           |                                                       |
| Goodness-of-fit on F <sup>2</sup> | 1.074                                                    |                                                       |
| Final R indices [I > 2σ(I)]       | R1 = 0.0625, wR2 = 0.1530                                |                                                       |
| R indices (all data)              | R1 = 0.1148, wR2 = 0.1761                                |                                                       |
| Extinction coefficient            | n/a                                                      |                                                       |
| Largest diff. peak and hole       | 0.292 and -0.297 e.Å <sup>-3</sup>                       |                                                       |

**Table S68.** Atomic coordinates (x 10<sup>4</sup>) and equivalent isotropic displacement parameters (Å<sup>2</sup> x 10<sup>3</sup>)  
**1a.** U(eq) is defined as one third of the trace of the orthogonalized U<sup>ij</sup> tensor.

|       | x       | y       | z       | U(eq) |
|-------|---------|---------|---------|-------|
| N(1)  | 2893(2) | 6399(2) | 5035(1) | 36(1) |
| N(2)  | 742(2)  | 1010(2) | 6123(1) | 40(1) |
| C(1)  | 2829(2) | 5262(2) | 7237(1) | 23(1) |
| C(2)  | 3218(2) | 6334(2) | 6994(1) | 26(1) |
| C(3)  | 3271(2) | 6712(2) | 6282(1) | 28(1) |
| C(4)  | 2863(2) | 6033(2) | 5746(1) | 24(1) |
| C(5)  | 3318(3) | 7503(2) | 4812(1) | 44(1) |
| C(6)  | 2469(3) | 5693(2) | 4484(1) | 39(1) |
| C(7)  | 2385(2) | 4991(2) | 5975(1) | 25(1) |
| C(8)  | 2372(2) | 4597(2) | 6694(1) | 23(1) |
| C(9)  | 1802(2) | 3517(2) | 6896(1) | 25(1) |
| C(10) | 1746(2) | 2636(2) | 6459(1) | 28(1) |
| C(11) | 1175(2) | 1570(2) | 6672(1) | 28(1) |
| C(12) | 1097(2) | 1144(2) | 7382(1) | 35(1) |
| C(13) | 547(3)  | 124(2)  | 7536(1) | 45(1) |

|       |         |         |          |       |
|-------|---------|---------|----------|-------|
| C(14) | 76(3)   | -434(2) | 6974(2)  | 47(1) |
| C(15) | 205(3)  | 35(2)   | 6290(1)  | 48(1) |
| C(16) | 3664(2) | 3442(2) | 8288(1)  | 22(1) |
| C(17) | 2731(2) | 3032(2) | 8867(1)  | 25(1) |
| C(18) | 1197(3) | 3918(2) | 9293(1)  | 42(1) |
| C(19) | 3166(2) | 1773(2) | 9040(1)  | 29(1) |
| C(20) | 4538(2) | 876(2)  | 8672(1)  | 30(1) |
| C(21) | 4965(3) | -481(2) | 8869(1)  | 48(1) |
| C(22) | 5484(2) | 1285(2) | 8121(1)  | 29(1) |
| C(23) | 5085(2) | 2532(2) | 7922(1)  | 26(1) |
| C(24) | 6249(3) | 2856(2) | 7325(1)  | 41(1) |
| C(25) | 2885(2) | 5906(2) | 8613(1)  | 23(1) |
| C(26) | 1249(2) | 6828(2) | 8760(1)  | 25(1) |
| C(27) | -337(2) | 6897(2) | 8364(1)  | 36(1) |
| C(28) | 1020(3) | 7673(2) | 9311(1)  | 30(1) |
| C(29) | 2369(3) | 7655(2) | 9728(1)  | 33(1) |
| C(30) | 2056(3) | 8532(2) | 10354(1) | 52(1) |
| C(31) | 4281(2) | 5925(2) | 9015(1)  | 26(1) |
| C(32) | 3997(3) | 6787(2) | 9561(1)  | 32(1) |
| C(33) | 6109(2) | 5040(2) | 8844(1)  | 37(1) |
| C(34) | 1885(3) | 2304(3) | 4239(2)  | 55(1) |
| C(35) | 3020(3) | 1161(3) | 4402(1)  | 54(1) |
| C(36) | 4325(3) | 548(2)  | 3897(2)  | 53(1) |
| C(37) | 4508(3) | 1081(2) | 3232(1)  | 49(1) |
| C(38) | 3368(3) | 2234(2) | 3069(1)  | 48(1) |
| C(39) | 2060(3) | 2844(2) | 3575(2)  | 55(1) |
| B(1)  | 3112(2) | 4859(2) | 8040(1)  | 22(1) |

**Table S69.** Bond lengths [Å] and angles [°] for **1a**.

|             |          |              |          |
|-------------|----------|--------------|----------|
| N(1)-C(4)   | 1.368(2) | C(10)-H(10)  | 0.9500   |
| N(1)-C(5)   | 1.444(3) | C(11)-C(12)  | 1.389(3) |
| N(1)-C(6)   | 1.451(3) | C(12)-C(13)  | 1.384(3) |
| N(2)-C(15)  | 1.334(3) | C(12)-H(12)  | 0.9500   |
| N(2)-C(11)  | 1.349(2) | C(13)-C(14)  | 1.380(3) |
| C(1)-C(2)   | 1.405(2) | C(13)-H(13)  | 0.9500   |
| C(1)-C(8)   | 1.424(2) | C(14)-C(15)  | 1.367(3) |
| C(1)-B(1)   | 1.553(3) | C(14)-H(14)  | 0.9500   |
| C(2)-C(3)   | 1.374(2) | C(15)-H(15)  | 0.9500   |
| C(2)-H(2)   | 0.9500   | C(16)-C(17)  | 1.413(2) |
| C(3)-C(4)   | 1.404(3) | C(16)-C(23)  | 1.416(2) |
| C(3)-H(3)   | 0.9500   | C(16)-B(1)   | 1.587(3) |
| C(4)-C(7)   | 1.403(2) | C(17)-C(19)  | 1.390(2) |
| C(5)-H(5A)  | 0.9800   | C(17)-C(18)  | 1.506(3) |
| C(5)-H(5B)  | 0.9800   | C(18)-H(18A) | 0.9800   |
| C(5)-H(5C)  | 0.9800   | C(18)-H(18B) | 0.9800   |
| C(6)-H(6A)  | 0.9800   | C(18)-H(18C) | 0.9800   |
| C(6)-H(6B)  | 0.9800   | C(19)-C(20)  | 1.389(3) |
| C(6)-H(6C)  | 0.9800   | C(19)-H(19)  | 0.9500   |
| C(7)-C(8)   | 1.389(2) | C(20)-C(22)  | 1.382(3) |
| C(7)-H(7)   | 0.9500   | C(20)-C(21)  | 1.506(3) |
| C(8)-C(9)   | 1.473(2) | C(21)-H(21A) | 0.9800   |
| C(9)-C(10)  | 1.326(3) | C(21)-H(21B) | 0.9800   |
| C(9)-H(9)   | 0.9500   | C(21)-H(21C) | 0.9800   |
| C(10)-C(11) | 1.463(2) | C(22)-C(23)  | 1.392(3) |

|                  |            |                     |            |
|------------------|------------|---------------------|------------|
| C(22)-H(22)      | 0.9500     | H(5A)-C(5)-H(5B)    | 109.5      |
| C(23)-C(24)      | 1.507(3)   | N(1)-C(5)-H(5C)     | 109.5      |
| C(24)-H(24A)     | 0.9800     | H(5A)-C(5)-H(5C)    | 109.5      |
| C(24)-H(24B)     | 0.9800     | H(5B)-C(5)-H(5C)    | 109.5      |
| C(24)-H(24C)     | 0.9800     | N(1)-C(6)-H(6A)     | 109.5      |
| C(25)-C(26)      | 1.410(2)   | N(1)-C(6)-H(6B)     | 109.5      |
| C(25)-C(31)      | 1.412(2)   | H(6A)-C(6)-H(6B)    | 109.5      |
| C(25)-B(1)       | 1.582(3)   | N(1)-C(6)-H(6C)     | 109.5      |
| C(26)-C(28)      | 1.388(3)   | H(6A)-C(6)-H(6C)    | 109.5      |
| C(26)-C(27)      | 1.512(3)   | H(6B)-C(6)-H(6C)    | 109.5      |
| C(27)-H(27A)     | 0.9800     | C(8)-C(7)-C(4)      | 122.63(17) |
| C(27)-H(27B)     | 0.9800     | C(8)-C(7)-H(7)      | 118.7      |
| C(27)-H(27C)     | 0.9800     | C(4)-C(7)-H(7)      | 118.7      |
| C(28)-C(29)      | 1.385(3)   | C(7)-C(8)-C(1)      | 120.45(16) |
| C(28)-H(28)      | 0.9500     | C(7)-C(8)-C(9)      | 119.48(16) |
| C(29)-C(32)      | 1.386(3)   | C(1)-C(8)-C(9)      | 120.02(16) |
| C(29)-C(30)      | 1.509(3)   | C(10)-C(9)-C(8)     | 126.80(17) |
| C(30)-H(30A)     | 0.9800     | C(10)-C(9)-H(9)     | 116.6      |
| C(30)-H(30B)     | 0.9800     | C(8)-C(9)-H(9)      | 116.6      |
| C(30)-H(30C)     | 0.9800     | C(9)-C(10)-C(11)    | 125.86(18) |
| C(31)-C(32)      | 1.388(3)   | C(9)-C(10)-H(10)    | 117.1      |
| C(31)-C(33)      | 1.511(3)   | C(11)-C(10)-H(10)   | 117.1      |
| C(32)-H(32)      | 0.9500     | N(2)-C(11)-C(12)    | 121.72(17) |
| C(33)-H(33A)     | 0.9800     | N(2)-C(11)-C(10)    | 115.01(17) |
| C(33)-H(33B)     | 0.9800     | C(12)-C(11)-C(10)   | 123.26(18) |
| C(33)-H(33C)     | 0.9800     | C(13)-C(12)-C(11)   | 119.5(2)   |
| C(34)-C(35)      | 1.367(4)   | C(13)-C(12)-H(12)   | 120.3      |
| C(34)-C(39)      | 1.371(4)   | C(11)-C(12)-H(12)   | 120.3      |
| C(34)-H(34)      | 0.9500     | C(14)-C(13)-C(12)   | 118.6(2)   |
| C(35)-C(36)      | 1.373(3)   | C(14)-C(13)-H(13)   | 120.7      |
| C(35)-H(35)      | 0.9500     | C(12)-C(13)-H(13)   | 120.7      |
| C(36)-C(37)      | 1.370(4)   | C(15)-C(14)-C(13)   | 118.30(19) |
| C(36)-H(36)      | 0.9500     | C(15)-C(14)-H(14)   | 120.9      |
| C(37)-C(38)      | 1.377(3)   | C(13)-C(14)-H(14)   | 120.9      |
| C(37)-H(37)      | 0.9500     | N(2)-C(15)-C(14)    | 124.5(2)   |
| C(38)-C(39)      | 1.374(3)   | N(2)-C(15)-H(15)    | 117.7      |
| C(38)-H(38)      | 0.9500     | C(14)-C(15)-H(15)   | 117.7      |
| C(39)-H(39)      | 0.9500     | C(17)-C(16)-C(23)   | 117.35(15) |
| C(4)-N(1)-C(5)   | 121.23(16) | C(17)-C(16)-B(1)    | 121.55(15) |
| C(4)-N(1)-C(6)   | 120.60(16) | C(23)-C(16)-B(1)    | 121.07(15) |
| C(5)-N(1)-C(6)   | 118.16(16) | C(19)-C(17)-C(16)   | 120.28(16) |
| C(15)-N(2)-C(11) | 117.35(19) | C(19)-C(17)-C(18)   | 117.80(16) |
| C(2)-C(1)-C(8)   | 115.38(16) | C(16)-C(17)-C(18)   | 121.86(16) |
| C(2)-C(1)-B(1)   | 117.43(16) | C(17)-C(18)-H(18A)  | 109.5      |
| C(8)-C(1)-B(1)   | 126.89(15) | C(17)-C(18)-H(18B)  | 109.5      |
| C(3)-C(2)-C(1)   | 124.35(17) | H(18A)-C(18)-H(18B) | 109.5      |
| C(3)-C(2)-H(2)   | 117.8      | C(17)-C(18)-H(18C)  | 109.5      |
| C(1)-C(2)-H(2)   | 117.8      | H(18A)-C(18)-H(18C) | 109.5      |
| C(2)-C(3)-C(4)   | 119.90(16) | H(18B)-C(18)-H(18C) | 109.5      |
| C(2)-C(3)-H(3)   | 120.0      | C(20)-C(19)-C(17)   | 122.43(17) |
| C(4)-C(3)-H(3)   | 120.0      | C(20)-C(19)-H(19)   | 118.8      |
| N(1)-C(4)-C(7)   | 121.90(16) | C(17)-C(19)-H(19)   | 118.8      |
| N(1)-C(4)-C(3)   | 120.90(16) | C(22)-C(20)-C(19)   | 117.15(16) |
| C(7)-C(4)-C(3)   | 117.19(16) | C(22)-C(20)-C(21)   | 121.77(18) |
| N(1)-C(5)-H(5A)  | 109.5      | C(19)-C(20)-C(21)   | 121.08(18) |
| N(1)-C(5)-H(5B)  | 109.5      | C(20)-C(21)-H(21A)  | 109.5      |



|                     |            |                     |            |
|---------------------|------------|---------------------|------------|
| C(20)-C(21)-H(21B)  | 109.5      | H(30A)-C(30)-H(30B) | 109.5      |
| H(21A)-C(21)-H(21B) | 109.5      | C(29)-C(30)-H(30C)  | 109.5      |
| C(20)-C(21)-H(21C)  | 109.5      | H(30A)-C(30)-H(30C) | 109.5      |
| H(21A)-C(21)-H(21C) | 109.5      | H(30B)-C(30)-H(30C) | 109.5      |
| H(21B)-C(21)-H(21C) | 109.5      | C(32)-C(31)-C(25)   | 120.10(17) |
| C(20)-C(22)-C(23)   | 122.57(17) | C(32)-C(31)-C(33)   | 119.11(17) |
| C(20)-C(22)-H(22)   | 118.7      | C(25)-C(31)-C(33)   | 120.76(17) |
| C(23)-C(22)-H(22)   | 118.7      | C(29)-C(32)-C(31)   | 122.17(18) |
| C(22)-C(23)-C(16)   | 120.17(16) | C(29)-C(32)-H(32)   | 118.9      |
| C(22)-C(23)-C(24)   | 117.22(16) | C(31)-C(32)-H(32)   | 118.9      |
| C(16)-C(23)-C(24)   | 122.59(16) | C(31)-C(33)-H(33A)  | 109.5      |
| C(23)-C(24)-H(24A)  | 109.5      | C(31)-C(33)-H(33B)  | 109.5      |
| C(23)-C(24)-H(24B)  | 109.5      | H(33A)-C(33)-H(33B) | 109.5      |
| H(24A)-C(24)-H(24B) | 109.5      | C(31)-C(33)-H(33C)  | 109.5      |
| C(23)-C(24)-H(24C)  | 109.5      | H(33A)-C(33)-H(33C) | 109.5      |
| H(24A)-C(24)-H(24C) | 109.5      | H(33B)-C(33)-H(33C) | 109.5      |
| H(24B)-C(24)-H(24C) | 109.5      | C(35)-C(34)-C(39)   | 120.1(2)   |
| C(26)-C(25)-C(31)   | 117.65(17) | C(35)-C(34)-H(34)   | 119.9      |
| C(26)-C(25)-B(1)    | 120.75(15) | C(39)-C(34)-H(34)   | 119.9      |
| C(31)-C(25)-B(1)    | 121.54(15) | C(34)-C(35)-C(36)   | 119.8(3)   |
| C(28)-C(26)-C(25)   | 120.31(17) | C(34)-C(35)-H(35)   | 120.1      |
| C(28)-C(26)-C(27)   | 117.39(16) | C(36)-C(35)-H(35)   | 120.1      |
| C(25)-C(26)-C(27)   | 122.20(16) | C(37)-C(36)-C(35)   | 120.4(2)   |
| C(26)-C(27)-H(27A)  | 109.5      | C(37)-C(36)-H(36)   | 119.8      |
| C(26)-C(27)-H(27B)  | 109.5      | C(35)-C(36)-H(36)   | 119.8      |
| H(27A)-C(27)-H(27B) | 109.5      | C(36)-C(37)-C(38)   | 119.7(2)   |
| C(26)-C(27)-H(27C)  | 109.5      | C(36)-C(37)-H(37)   | 120.1      |
| H(27A)-C(27)-H(27C) | 109.5      | C(38)-C(37)-H(37)   | 120.1      |
| H(27B)-C(27)-H(27C) | 109.5      | C(39)-C(38)-C(37)   | 119.7(2)   |
| C(29)-C(28)-C(26)   | 122.00(18) | C(39)-C(38)-H(38)   | 120.1      |
| C(29)-C(28)-H(28)   | 119.0      | C(37)-C(38)-H(38)   | 120.1      |
| C(26)-C(28)-H(28)   | 119.0      | C(34)-C(39)-C(38)   | 120.2(2)   |
| C(28)-C(29)-C(32)   | 117.62(18) | C(34)-C(39)-H(39)   | 119.9      |
| C(28)-C(29)-C(30)   | 120.90(19) | C(38)-C(39)-H(39)   | 119.9      |
| C(32)-C(29)-C(30)   | 121.46(19) | C(1)-B(1)-C(25)     | 118.01(15) |
| C(29)-C(30)-H(30A)  | 109.5      | C(1)-B(1)-C(16)     | 121.97(16) |
| C(29)-C(30)-H(30B)  | 109.5      | C(25)-B(1)-C(16)    | 120.00(15) |

**Table S70.** Anisotropic displacement parameters ( $\text{\AA}^2 \times 10^3$ ) 1a. The anisotropic displacement factor exponent takes the form:  $-2\pi^2 [ h^2 a^{*2} U^{11} + \dots + 2 h k a^* b^* U^{12} ]$

|      | U <sup>11</sup> | U <sup>22</sup> | U <sup>33</sup> | U <sup>23</sup> | U <sup>13</sup> | U <sup>12</sup> |
|------|-----------------|-----------------|-----------------|-----------------|-----------------|-----------------|
| N(1) | 56(1)           | 38(1)           | 20(1)           | 6(1)            | -6(1)           | -25(1)          |
| N(2) | 47(1)           | 33(1)           | 45(1)           | -10(1)          | -1(1)           | -21(1)          |
| C(1) | 24(1)           | 22(1)           | 22(1)           | -1(1)           | -2(1)           | -6(1)           |
| C(2) | 32(1)           | 24(1)           | 23(1)           | 0(1)            | -2(1)           | -11(1)          |
| C(3) | 36(1)           | 24(1)           | 27(1)           | 4(1)            | -3(1)           | -14(1)          |
| C(4) | 26(1)           | 25(1)           | 20(1)           | 2(1)            | -2(1)           | -7(1)           |
| C(5) | 69(2)           | 41(1)           | 28(1)           | 11(1)           | -3(1)           | -25(1)          |
| C(6) | 51(1)           | 50(1)           | 21(1)           | 2(1)            | -4(1)           | -22(1)          |
| C(7) | 28(1)           | 25(1)           | 22(1)           | 0(1)            | -4(1)           | -10(1)          |
| C(8) | 21(1)           | 21(1)           | 26(1)           | 1(1)            | -3(1)           | -5(1)           |

|       |       |       |       |        |        |        |
|-------|-------|-------|-------|--------|--------|--------|
| C(9)  | 27(1) | 28(1) | 24(1) | 4(1)   | -5(1)  | -11(1) |
| C(10) | 31(1) | 27(1) | 28(1) | 1(1)   | -3(1)  | -12(1) |
| C(11) | 23(1) | 23(1) | 39(1) | -2(1)  | -2(1)  | -7(1)  |
| C(12) | 34(1) | 32(1) | 42(1) | 6(1)   | -6(1)  | -13(1) |
| C(13) | 38(1) | 36(1) | 58(2) | 14(1)  | 2(1)   | -13(1) |
| C(14) | 41(1) | 28(1) | 77(2) | -4(1)  | 9(1)   | -19(1) |
| C(15) | 48(1) | 36(1) | 67(2) | -13(1) | 2(1)   | -23(1) |
| C(16) | 25(1) | 26(1) | 17(1) | 1(1)   | -2(1)  | -9(1)  |
| C(17) | 29(1) | 26(1) | 20(1) | 2(1)   | 0(1)   | -8(1)  |
| C(18) | 44(1) | 33(1) | 42(1) | 2(1)   | 19(1)  | -8(1)  |
| C(19) | 33(1) | 29(1) | 24(1) | 4(1)   | 2(1)   | -11(1) |
| C(20) | 36(1) | 24(1) | 27(1) | 3(1)   | -6(1)  | -8(1)  |
| C(21) | 59(1) | 25(1) | 52(2) | 7(1)   | 2(1)   | -6(1)  |
| C(22) | 28(1) | 26(1) | 26(1) | -2(1)  | 0(1)   | 0(1)   |
| C(23) | 27(1) | 29(1) | 20(1) | 1(1)   | 0(1)   | -7(1)  |
| C(24) | 36(1) | 41(1) | 37(1) | 3(1)   | 12(1)  | -6(1)  |
| C(25) | 30(1) | 23(1) | 18(1) | 4(1)   | -2(1)  | -11(1) |
| C(26) | 31(1) | 23(1) | 21(1) | 1(1)   | -2(1)  | -11(1) |
| C(27) | 30(1) | 37(1) | 37(1) | -6(1)  | -7(1)  | -6(1)  |
| C(28) | 37(1) | 25(1) | 27(1) | -1(1)  | 0(1)   | -11(1) |
| C(29) | 49(1) | 31(1) | 25(1) | -3(1)  | -3(1)  | -20(1) |
| C(30) | 72(2) | 52(1) | 38(1) | -16(1) | -7(1)  | -25(1) |
| C(31) | 30(1) | 28(1) | 23(1) | 5(1)   | -4(1)  | -14(1) |
| C(32) | 41(1) | 37(1) | 27(1) | 1(1)   | -10(1) | -22(1) |
| C(33) | 28(1) | 41(1) | 44(1) | 0(1)   | -9(1)  | -12(1) |
| C(34) | 34(1) | 74(2) | 54(2) | -31(1) | -3(1)  | -10(1) |
| C(35) | 46(1) | 74(2) | 47(2) | -6(1)  | -9(1)  | -24(1) |
| C(36) | 43(1) | 42(1) | 71(2) | -7(1)  | -15(1) | -6(1)  |
| C(37) | 30(1) | 59(2) | 57(2) | -21(1) | 0(1)   | -10(1) |
| C(38) | 42(1) | 60(2) | 48(2) | -3(1)  | -15(1) | -23(1) |
| C(39) | 39(1) | 47(1) | 72(2) | -20(1) | -21(1) | 0(1)   |
| B(1)  | 19(1) | 26(1) | 23(1) | 2(1)   | 0(1)   | -8(1)  |

**Table S71.** Hydrogen coordinates ( $\times 10^4$ ) and isotropic displacement parameters ( $\text{\AA}^2 \times 10^3$ ) of **1a**.

|        | x    | y     | z    | U(eq) |
|--------|------|-------|------|-------|
| H(2)   | 3461 | 6829  | 7346 | 31    |
| H(3)   | 3583 | 7433  | 6153 | 34    |
| H(5A)  | 4503 | 7413  | 4938 | 66    |
| H(5B)  | 2481 | 8226  | 5059 | 66    |
| H(5C)  | 3257 | 7620  | 4287 | 66    |
| H(6A)  | 2558 | 6087  | 4009 | 59    |
| H(6B)  | 1273 | 5674  | 4591 | 59    |
| H(6C)  | 3290 | 4842  | 4479 | 59    |
| H(7)   | 2057 | 4537  | 5625 | 30    |
| H(9)   | 1436 | 3443  | 7391 | 30    |
| H(10)  | 2110 | 2704  | 5962 | 33    |
| H(12)  | 1419 | 1549  | 7760 | 42    |
| H(13)  | 495  | -185  | 8018 | 54    |
| H(14)  | -328 | -1126 | 7062 | 57    |
| H(15)  | -110 | -360  | 5906 | 58    |
| H(18A) | 314  | 4372  | 8963 | 64    |

|        |       |      |       |    |
|--------|-------|------|-------|----|
| H(18B) | 1592  | 4509 | 9545  | 64 |
| H(18C) | 686   | 3451 | 9649  | 64 |
| H(19)  | 2501  | 1517 | 9423  | 34 |
| H(21A) | 3975  | -757 | 8780  | 72 |
| H(21B) | 5193  | -603 | 9382  | 72 |
| H(21C) | 6006  | -965 | 8573  | 72 |
| H(22)  | 6443  | 690  | 7869  | 34 |
| H(24A) | 5586  | 3148 | 6898  | 61 |
| H(24B) | 7253  | 2118 | 7200  | 61 |
| H(24C) | 6664  | 3513 | 7488  | 61 |
| H(27A) | -17   | 6236 | 8003  | 53 |
| H(27B) | -761  | 7707 | 8120  | 53 |
| H(27C) | -1261 | 6791 | 8710  | 53 |
| H(28)  | -95   | 8282 | 9405  | 35 |
| H(30A) | 1766  | 9388 | 10170 | 78 |
| H(30B) | 3116  | 8325 | 10618 | 78 |
| H(30C) | 1084  | 8451 | 10682 | 78 |
| H(32)  | 4951  | 6781 | 9828  | 39 |
| H(33A) | 6083  | 4185 | 8858  | 56 |
| H(33B) | 6879  | 5132 | 9203  | 56 |
| H(33C) | 6549  | 5231 | 8360  | 56 |
| H(34)  | 974   | 2726 | 4585  | 67 |
| H(35)  | 2907  | 791  | 4864  | 65 |
| H(36)  | 5105  | -251 | 4009  | 64 |
| H(37)  | 5419  | 657  | 2886  | 59 |
| H(38)  | 3484  | 2607 | 2608  | 57 |
| H(39)  | 1275  | 3642 | 3464  | 66 |

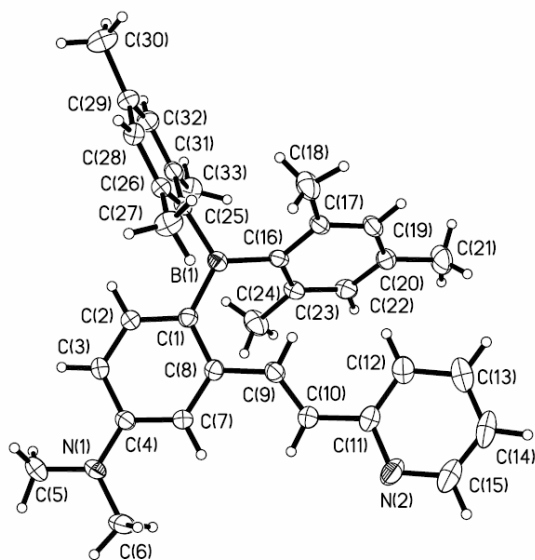

**Figure S151.** Structure of **1a**.

**Table S72.** Crystal data and structure refinement for **3a**.

|                     |                                       |
|---------------------|---------------------------------------|
| Identification code | <b>3a</b>                             |
| Empirical formula   | C <sub>35</sub> H <sub>40</sub> B N O |
| Formula weight      | 501.49                                |
| Temperature         | 180(2) K                              |
| Wavelength          | 0.71073 Å                             |
| Crystal system      | Monoclinic                            |

|                                   |                                                         |                                         |
|-----------------------------------|---------------------------------------------------------|-----------------------------------------|
| Space group                       | P2 <sub>1</sub> /c                                      |                                         |
| Unit cell dimensions              | a = 7.2959(3) Å<br>b = 22.3592(8) Å<br>c = 17.9840(7) Å | α = 90°.<br>β = 92.626(2)°.<br>γ = 90°. |
| Volume                            | 2930.7(2) Å <sup>3</sup>                                |                                         |
| Z                                 | 4                                                       |                                         |
| Density (calculated)              | 1.137 Mg/m <sup>3</sup>                                 |                                         |
| Absorption coefficient            | 0.066 mm <sup>-1</sup>                                  |                                         |
| F(000)                            | 1080                                                    |                                         |
| Crystal size                      | 0.358 x 0.239 x 0.164 mm <sup>3</sup>                   |                                         |
| Theta range for data collection   | 2.267 to 27.238°.                                       |                                         |
| Index ranges                      | -9 ≤ h ≤ 8, -28 ≤ k ≤ 28, -23 ≤ l ≤ 23                  |                                         |
| Reflections collected             | 35189                                                   |                                         |
| Independent reflections           | 6531 [R(int) = 0.0937]                                  |                                         |
| Completeness to theta = 25.242°   | 99.9 %                                                  |                                         |
| Absorption correction             | Semi-empirical from equivalents                         |                                         |
| Max. and min. transmission        | 0.989 and 0.977                                         |                                         |
| Refinement method                 | Full-matrix least-squares on F <sup>2</sup>             |                                         |
| Data / restraints / parameters    | 6531 / 0 / 352                                          |                                         |
| Goodness-of-fit on F <sup>2</sup> | 1.051                                                   |                                         |
| Final R indices [I > 2σ(I)]       | R1 = 0.0628, wR2 = 0.1449                               |                                         |
| R indices (all data)              | R1 = 0.1000, wR2 = 0.1614                               |                                         |
| Extinction coefficient            | n/a                                                     |                                         |
| Largest diff. peak and hole       | 0.257 and -0.287 e.Å <sup>-3</sup>                      |                                         |

**Table S73.** Atomic coordinates ( $\times 10^4$ ) and equivalent isotropic displacement parameters ( $\text{\AA}^2 \times 10^3$ ) for **3a**.  $U(\text{eq})$  is defined as one third of the trace of the orthogonalized  $U_{ij}$  tensor.

|       | x       | y       | z       | U(eq) |
|-------|---------|---------|---------|-------|
| B(1)  | 6237(3) | 2785(1) | 4306(1) | 24(1) |
| O(1)  | 8384(2) | 5850(1) | 3860(1) | 35(1) |
| N(1)  | 6377(2) | 4390(1) | 6815(1) | 32(1) |
| C(1)  | 6478(3) | 3233(1) | 4954(1) | 23(1) |
| C(2)  | 6035(3) | 3037(1) | 5668(1) | 25(1) |
| C(3)  | 5980(3) | 3404(1) | 6280(1) | 25(1) |
| C(4)  | 6414(3) | 4015(1) | 6219(1) | 23(1) |
| C(5)  | 6933(3) | 4219(1) | 5520(1) | 24(1) |
| C(6)  | 6951(2) | 3851(1) | 4900(1) | 22(1) |
| C(7)  | 7555(3) | 4102(1) | 4193(1) | 24(1) |
| C(8)  | 7503(3) | 4677(1) | 3999(1) | 26(1) |
| C(9)  | 8060(3) | 4916(1) | 3284(1) | 26(1) |
| C(10) | 8124(3) | 4565(1) | 2647(1) | 34(1) |
| C(11) | 8675(3) | 4800(1) | 1979(1) | 42(1) |
| C(12) | 9170(3) | 5396(1) | 1941(1) | 41(1) |
| C(13) | 9090(3) | 5759(1) | 2558(1) | 33(1) |
| C(14) | 8522(3) | 5526(1) | 3226(1) | 27(1) |
| C(15) | 8806(3) | 6472(1) | 3843(2) | 43(1) |
| C(16) | 5981(3) | 4172(1) | 7551(1) | 36(1) |
| C(17) | 6843(3) | 5019(1) | 6755(1) | 35(1) |
| C(18) | 6466(3) | 2086(1) | 4456(1) | 24(1) |
| C(19) | 8084(3) | 1855(1) | 4814(1) | 28(1) |
| C(20) | 9607(3) | 2254(1) | 5125(1) | 37(1) |

|       |         |         |         |       |
|-------|---------|---------|---------|-------|
| C(21) | 8344(3) | 1239(1) | 4882(1) | 32(1) |
| C(22) | 7025(3) | 832(1)  | 4628(1) | 31(1) |
| C(23) | 7362(4) | 166(1)  | 4685(1) | 45(1) |
| C(24) | 5416(3) | 1057(1) | 4305(1) | 29(1) |
| C(25) | 5119(3) | 1670(1) | 4204(1) | 26(1) |
| C(26) | 3337(3) | 1860(1) | 3820(1) | 38(1) |
| C(27) | 5665(3) | 3000(1) | 3487(1) | 24(1) |
| C(28) | 6746(3) | 2866(1) | 2877(1) | 28(1) |
| C(29) | 8546(3) | 2537(1) | 2980(1) | 38(1) |
| C(30) | 6215(3) | 3067(1) | 2165(1) | 33(1) |
| C(31) | 4602(3) | 3378(1) | 2025(1) | 36(1) |
| C(32) | 4059(4) | 3597(1) | 1250(1) | 60(1) |
| C(33) | 3523(3) | 3499(1) | 2622(1) | 34(1) |
| C(34) | 4040(3) | 3330(1) | 3348(1) | 28(1) |
| C(35) | 2803(3) | 3506(1) | 3964(1) | 36(1) |

**Table S74.** Bond lengths [Å] and angles [°] for **3a**.

|              |          |              |          |
|--------------|----------|--------------|----------|
| B(1)-C(1)    | 1.541(3) | C(17)-H(17A) | 0.9800   |
| B(1)-C(27)   | 1.587(3) | C(17)-H(17B) | 0.9800   |
| B(1)-C(18)   | 1.594(3) | C(17)-H(17C) | 0.9800   |
| O(1)-C(14)   | 1.357(2) | C(18)-C(25)  | 1.413(3) |
| O(1)-C(15)   | 1.427(2) | C(18)-C(19)  | 1.416(3) |
| N(1)-C(4)    | 1.362(2) | C(19)-C(21)  | 1.396(3) |
| N(1)-C(16)   | 1.451(3) | C(19)-C(20)  | 1.512(3) |
| N(1)-C(17)   | 1.451(2) | C(20)-H(20A) | 0.9800   |
| C(1)-C(2)    | 1.408(3) | C(20)-H(20B) | 0.9800   |
| C(1)-C(6)    | 1.428(2) | C(20)-H(20C) | 0.9800   |
| C(2)-C(3)    | 1.374(3) | C(21)-C(22)  | 1.386(3) |
| C(2)-H(2)    | 0.9500   | C(21)-H(21)  | 0.9500   |
| C(3)-C(4)    | 1.409(2) | C(22)-C(24)  | 1.380(3) |
| C(3)-H(3)    | 0.9500   | C(22)-C(23)  | 1.512(3) |
| C(4)-C(5)    | 1.405(3) | C(23)-H(23A) | 0.9800   |
| C(5)-C(6)    | 1.387(2) | C(23)-H(23B) | 0.9800   |
| C(5)-H(5)    | 0.9500   | C(23)-H(23C) | 0.9800   |
| C(6)-C(7)    | 1.475(3) | C(24)-C(25)  | 1.399(3) |
| C(7)-C(8)    | 1.334(3) | C(24)-H(24)  | 0.9500   |
| C(7)-H(7)    | 0.9500   | C(25)-C(26)  | 1.506(3) |
| C(8)-C(9)    | 1.466(3) | C(26)-H(26A) | 0.9800   |
| C(8)-H(8)    | 0.9500   | C(26)-H(26B) | 0.9800   |
| C(9)-C(10)   | 1.391(3) | C(26)-H(26C) | 0.9800   |
| C(9)-C(14)   | 1.411(3) | C(27)-C(34)  | 1.410(3) |
| C(10)-C(11)  | 1.388(3) | C(27)-C(28)  | 1.412(3) |
| C(10)-H(10)  | 0.9500   | C(28)-C(30)  | 1.395(3) |
| C(11)-C(12)  | 1.383(3) | C(28)-C(29)  | 1.510(3) |
| C(11)-H(11)  | 0.9500   | C(29)-H(29A) | 0.9800   |
| C(12)-C(13)  | 1.378(3) | C(29)-H(29B) | 0.9800   |
| C(12)-H(12)  | 0.9500   | C(29)-H(29C) | 0.9800   |
| C(13)-C(14)  | 1.389(3) | C(30)-C(31)  | 1.380(3) |
| C(13)-H(13)  | 0.9500   | C(30)-H(30)  | 0.9500   |
| C(15)-H(15A) | 0.9800   | C(31)-C(33)  | 1.385(3) |
| C(15)-H(15B) | 0.9800   | C(31)-C(32)  | 1.513(3) |
| C(15)-H(15C) | 0.9800   | C(32)-H(32A) | 0.9800   |
| C(16)-H(16A) | 0.9800   | C(32)-H(32B) | 0.9800   |
| C(16)-H(16B) | 0.9800   | C(32)-H(32C) | 0.9800   |
| C(16)-H(16C) | 0.9800   | C(33)-C(34)  | 1.394(3) |

|                   |            |                     |            |
|-------------------|------------|---------------------|------------|
| C(33)-H(33)       | 0.9500     | H(15A)-C(15)-H(15B) | 109.5      |
| C(34)-C(35)       | 1.513(3)   | O(1)-C(15)-H(15C)   | 109.5      |
| C(35)-H(35A)      | 0.9800     | H(15A)-C(15)-H(15C) | 109.5      |
| C(35)-H(35B)      | 0.9800     | H(15B)-C(15)-H(15C) | 109.5      |
| C(35)-H(35C)      | 0.9800     | N(1)-C(16)-H(16A)   | 109.5      |
| C(1)-B(1)-C(27)   | 121.42(16) | N(1)-C(16)-H(16B)   | 109.5      |
| C(1)-B(1)-C(18)   | 120.10(17) | H(16A)-C(16)-H(16B) | 109.5      |
| C(27)-B(1)-C(18)  | 118.41(16) | N(1)-C(16)-H(16C)   | 109.5      |
| C(14)-O(1)-C(15)  | 118.56(17) | H(16A)-C(16)-H(16C) | 109.5      |
| C(4)-N(1)-C(16)   | 121.47(16) | H(16B)-C(16)-H(16C) | 109.5      |
| C(4)-N(1)-C(17)   | 121.60(16) | N(1)-C(17)-H(17A)   | 109.5      |
| C(16)-N(1)-C(17)  | 116.82(16) | N(1)-C(17)-H(17B)   | 109.5      |
| C(2)-C(1)-C(6)    | 115.40(16) | H(17A)-C(17)-H(17B) | 109.5      |
| C(2)-C(1)-B(1)    | 117.73(16) | N(1)-C(17)-H(17C)   | 109.5      |
| C(6)-C(1)-B(1)    | 126.61(16) | H(17A)-C(17)-H(17C) | 109.5      |
| C(3)-C(2)-C(1)    | 124.14(17) | H(17B)-C(17)-H(17C) | 109.5      |
| C(3)-C(2)-H(2)    | 117.9      | C(25)-C(18)-C(19)   | 117.29(16) |
| C(1)-C(2)-H(2)    | 117.9      | C(25)-C(18)-B(1)    | 121.71(17) |
| C(2)-C(3)-C(4)    | 120.13(17) | C(19)-C(18)-B(1)    | 120.91(17) |
| C(2)-C(3)-H(3)    | 119.9      | C(21)-C(19)-C(18)   | 120.51(18) |
| C(4)-C(3)-H(3)    | 119.9      | C(21)-C(19)-C(20)   | 117.08(18) |
| N(1)-C(4)-C(5)    | 121.34(17) | C(18)-C(19)-C(20)   | 122.41(17) |
| N(1)-C(4)-C(3)    | 121.58(17) | C(19)-C(20)-H(20A)  | 109.5      |
| C(5)-C(4)-C(3)    | 117.07(17) | C(19)-C(20)-H(20B)  | 109.5      |
| C(6)-C(5)-C(4)    | 122.63(17) | H(20A)-C(20)-H(20B) | 109.5      |
| C(6)-C(5)-H(5)    | 118.7      | C(19)-C(20)-H(20C)  | 109.5      |
| C(4)-C(5)-H(5)    | 118.7      | H(20A)-C(20)-H(20C) | 109.5      |
| C(5)-C(6)-C(1)    | 120.56(16) | H(20B)-C(20)-H(20C) | 109.5      |
| C(5)-C(6)-C(7)    | 118.75(16) | C(22)-C(21)-C(19)   | 121.88(19) |
| C(1)-C(6)-C(7)    | 120.63(16) | C(22)-C(21)-H(21)   | 119.1      |
| C(8)-C(7)-C(6)    | 125.93(17) | C(19)-C(21)-H(21)   | 119.1      |
| C(8)-C(7)-H(7)    | 117.0      | C(24)-C(22)-C(21)   | 117.73(17) |
| C(6)-C(7)-H(7)    | 117.0      | C(24)-C(22)-C(23)   | 121.3(2)   |
| C(7)-C(8)-C(9)    | 125.09(18) | C(21)-C(22)-C(23)   | 120.9(2)   |
| C(7)-C(8)-H(8)    | 117.5      | C(22)-C(23)-H(23A)  | 109.5      |
| C(9)-C(8)-H(8)    | 117.5      | C(22)-C(23)-H(23B)  | 109.5      |
| C(10)-C(9)-C(14)  | 117.87(18) | H(23A)-C(23)-H(23B) | 109.5      |
| C(10)-C(9)-C(8)   | 122.59(17) | C(22)-C(23)-H(23C)  | 109.5      |
| C(14)-C(9)-C(8)   | 119.53(17) | H(23A)-C(23)-H(23C) | 109.5      |
| C(11)-C(10)-C(9)  | 121.44(19) | H(23B)-C(23)-H(23C) | 109.5      |
| C(11)-C(10)-H(10) | 119.3      | C(22)-C(24)-C(25)   | 122.31(19) |
| C(9)-C(10)-H(10)  | 119.3      | C(22)-C(24)-H(24)   | 118.8      |
| C(12)-C(11)-C(10) | 119.6(2)   | C(25)-C(24)-H(24)   | 118.8      |
| C(12)-C(11)-H(11) | 120.2      | C(24)-C(25)-C(18)   | 120.19(18) |
| C(10)-C(11)-H(11) | 120.2      | C(24)-C(25)-C(26)   | 117.53(17) |
| C(13)-C(12)-C(11) | 120.4(2)   | C(18)-C(25)-C(26)   | 122.28(17) |
| C(13)-C(12)-H(12) | 119.8      | C(25)-C(26)-H(26A)  | 109.5      |
| C(11)-C(12)-H(12) | 119.8      | C(25)-C(26)-H(26B)  | 109.5      |
| C(12)-C(13)-C(14) | 120.12(19) | H(26A)-C(26)-H(26B) | 109.5      |
| C(12)-C(13)-H(13) | 119.9      | C(25)-C(26)-H(26C)  | 109.5      |
| C(14)-C(13)-H(13) | 119.9      | H(26A)-C(26)-H(26C) | 109.5      |
| O(1)-C(14)-C(13)  | 124.26(18) | H(26B)-C(26)-H(26C) | 109.5      |
| O(1)-C(14)-C(9)   | 115.24(17) | C(34)-C(27)-C(28)   | 117.90(17) |
| C(13)-C(14)-C(9)  | 120.49(19) | C(34)-C(27)-B(1)    | 120.47(17) |
| O(1)-C(15)-H(15A) | 109.5      | C(28)-C(27)-B(1)    | 121.63(17) |
| O(1)-C(15)-H(15B) | 109.5      | C(30)-C(28)-C(27)   | 120.25(19) |

|                     |            |                     |            |
|---------------------|------------|---------------------|------------|
| C(30)-C(28)-C(29)   | 118.24(19) | H(32A)-C(32)-H(32B) | 109.5      |
| C(27)-C(28)-C(29)   | 121.42(17) | C(31)-C(32)-H(32C)  | 109.5      |
| C(28)-C(29)-H(29A)  | 109.5      | H(32A)-C(32)-H(32C) | 109.5      |
| C(28)-C(29)-H(29B)  | 109.5      | H(32B)-C(32)-H(32C) | 109.5      |
| H(29A)-C(29)-H(29B) | 109.5      | C(31)-C(33)-C(34)   | 122.3(2)   |
| C(28)-C(29)-H(29C)  | 109.5      | C(31)-C(33)-H(33)   | 118.9      |
| H(29A)-C(29)-H(29C) | 109.5      | C(34)-C(33)-H(33)   | 118.9      |
| H(29B)-C(29)-H(29C) | 109.5      | C(33)-C(34)-C(27)   | 119.81(19) |
| C(31)-C(30)-C(28)   | 121.9(2)   | C(33)-C(34)-C(35)   | 118.16(19) |
| C(31)-C(30)-H(30)   | 119.1      | C(27)-C(34)-C(35)   | 122.03(18) |
| C(28)-C(30)-H(30)   | 119.1      | C(34)-C(35)-H(35A)  | 109.5      |
| C(30)-C(31)-C(33)   | 117.81(19) | C(34)-C(35)-H(35B)  | 109.5      |
| C(30)-C(31)-C(32)   | 121.0(2)   | H(35A)-C(35)-H(35B) | 109.5      |
| C(33)-C(31)-C(32)   | 121.1(2)   | C(34)-C(35)-H(35C)  | 109.5      |
| C(31)-C(32)-H(32A)  | 109.5      | H(35A)-C(35)-H(35C) | 109.5      |
| C(31)-C(32)-H(32B)  | 109.5      | H(35B)-C(35)-H(35C) | 109.5      |

**Table S75.** Anisotropic displacement parameters ( $\text{\AA}^2 \times 10^3$ ) for **3a**. The anisotropic displacement factor exponent takes the form:  $-2\pi^2 [ h^2 a^{*2} U^{11} + \dots + 2 h k a^* b^* U^{12} ]$

|       | U <sup>11</sup> | U <sup>22</sup> | U <sup>33</sup> | U <sup>23</sup> | U <sup>13</sup> | U <sup>12</sup> |
|-------|-----------------|-----------------|-----------------|-----------------|-----------------|-----------------|
| B(1)  | 26(1)           | 22(1)           | 24(1)           | 1(1)            | 5(1)            | -3(1)           |
| O(1)  | 47(1)           | 21(1)           | 38(1)           | -2(1)           | 5(1)            | -7(1)           |
| N(1)  | 47(1)           | 26(1)           | 22(1)           | -3(1)           | 5(1)            | -2(1)           |
| C(1)  | 29(1)           | 19(1)           | 21(1)           | 1(1)            | 2(1)            | -2(1)           |
| C(2)  | 32(1)           | 18(1)           | 24(1)           | 4(1)            | 0(1)            | -3(1)           |
| C(3)  | 29(1)           | 26(1)           | 18(1)           | 5(1)            | 4(1)            | -2(1)           |
| C(4)  | 24(1)           | 23(1)           | 21(1)           | -1(1)           | 0(1)            | 1(1)            |
| C(5)  | 28(1)           | 18(1)           | 25(1)           | 1(1)            | 1(1)            | -2(1)           |
| C(6)  | 24(1)           | 20(1)           | 21(1)           | 2(1)            | 1(1)            | 0(1)            |
| C(7)  | 28(1)           | 22(1)           | 22(1)           | 0(1)            | 3(1)            | -4(1)           |
| C(8)  | 32(1)           | 24(1)           | 22(1)           | 1(1)            | 2(1)            | -3(1)           |
| C(9)  | 27(1)           | 25(1)           | 26(1)           | 5(1)            | 2(1)            | -3(1)           |
| C(10) | 45(1)           | 27(1)           | 29(1)           | 2(1)            | 3(1)            | -6(1)           |
| C(11) | 57(2)           | 44(1)           | 26(1)           | 3(1)            | 9(1)            | 1(1)            |
| C(12) | 45(1)           | 45(1)           | 32(1)           | 16(1)           | 11(1)           | 4(1)            |
| C(13) | 30(1)           | 28(1)           | 42(1)           | 15(1)           | 6(1)            | 0(1)            |
| C(14) | 24(1)           | 25(1)           | 31(1)           | 4(1)            | 0(1)            | 0(1)            |
| C(15) | 38(1)           | 23(1)           | 67(2)           | -4(1)           | 5(1)            | -5(1)           |
| C(16) | 46(1)           | 40(1)           | 23(1)           | -5(1)           | 7(1)            | -3(1)           |
| C(17) | 47(1)           | 24(1)           | 32(1)           | -8(1)           | -1(1)           | 0(1)            |
| C(18) | 35(1)           | 20(1)           | 18(1)           | -1(1)           | 5(1)            | -2(1)           |
| C(19) | 37(1)           | 24(1)           | 23(1)           | 0(1)            | 4(1)            | -2(1)           |
| C(20) | 38(1)           | 30(1)           | 42(1)           | -1(1)           | -5(1)           | 0(1)            |
| C(21) | 40(1)           | 26(1)           | 30(1)           | 4(1)            | 4(1)            | 5(1)            |
| C(22) | 49(1)           | 20(1)           | 26(1)           | 2(1)            | 13(1)           | 0(1)            |
| C(23) | 59(2)           | 22(1)           | 55(2)           | 3(1)            | 14(1)           | 1(1)            |
| C(24) | 43(1)           | 22(1)           | 23(1)           | -2(1)           | 8(1)            | -8(1)           |
| C(25) | 37(1)           | 24(1)           | 18(1)           | -2(1)           | 5(1)            | -3(1)           |
| C(26) | 40(1)           | 29(1)           | 45(1)           | -4(1)           | -4(1)           | -7(1)           |
| C(27) | 34(1)           | 17(1)           | 22(1)           | -1(1)           | 1(1)            | -5(1)           |
| C(28) | 41(1)           | 21(1)           | 23(1)           | -4(1)           | 0(1)            | -7(1)           |
| C(29) | 43(1)           | 42(1)           | 31(1)           | -5(1)           | 8(1)            | 4(1)            |

|       |       |       |       |       |        |       |
|-------|-------|-------|-------|-------|--------|-------|
| C(30) | 52(1) | 24(1) | 24(1) | -5(1) | 5(1)   | -7(1) |
| C(31) | 61(2) | 24(1) | 24(1) | -1(1) | -6(1)  | -4(1) |
| C(32) | 94(2) | 55(2) | 29(1) | 5(1)  | -10(1) | 11(2) |
| C(33) | 44(1) | 21(1) | 35(1) | 0(1)  | -10(1) | 0(1)  |
| C(34) | 36(1) | 19(1) | 30(1) | 0(1)  | 1(1)   | -4(1) |
| C(35) | 37(1) | 30(1) | 40(1) | 2(1)  | 5(1)   | 4(1)  |

**Table S76.** Hydrogen coordinates ( $\times 10^4$ ) and isotropic displacement parameters ( $\text{\AA}^2 \times 10^3$ ) for **3a**.

|        | x     | y    | z    | U(eq) |
|--------|-------|------|------|-------|
| H(2)   | 5757  | 2626 | 5731 | 30    |
| H(3)   | 5649  | 3245 | 6745 | 29    |
| H(5)   | 7286  | 4626 | 5470 | 29    |
| H(7)   | 8024  | 3829 | 3845 | 29    |
| H(8)   | 7072  | 4954 | 4351 | 31    |
| H(10)  | 7784  | 4156 | 2670 | 41    |
| H(11)  | 8711  | 4554 | 1549 | 50    |
| H(12)  | 9568  | 5557 | 1487 | 49    |
| H(13)  | 9424  | 6168 | 2527 | 40    |
| H(15A) | 10095 | 6526 | 3726 | 64    |
| H(15B) | 8597  | 6650 | 4330 | 64    |
| H(15C) | 8018  | 6670 | 3462 | 64    |
| H(16A) | 4755  | 3992 | 7536 | 54    |
| H(16B) | 6027  | 4506 | 7905 | 54    |
| H(16C) | 6894  | 3871 | 7708 | 54    |
| H(17A) | 8158  | 5059 | 6679 | 52    |
| H(17B) | 6540  | 5227 | 7213 | 52    |
| H(17C) | 6143  | 5196 | 6331 | 52    |
| H(20A) | 10760 | 2029 | 5157 | 56    |
| H(20B) | 9309  | 2392 | 5623 | 56    |
| H(20C) | 9737  | 2600 | 4797 | 56    |
| H(21)  | 9458  | 1093 | 5110 | 39    |
| H(23A) | 6246  | -49  | 4522 | 67    |
| H(23B) | 7694  | 62   | 5203 | 67    |
| H(23C) | 8366  | 55   | 4369 | 67    |
| H(24)  | 4476  | 785  | 4146 | 35    |
| H(26A) | 3549  | 1966 | 3301 | 57    |
| H(26B) | 2849  | 2208 | 4076 | 57    |
| H(26C) | 2452  | 1531 | 3831 | 57    |
| H(29A) | 9146  | 2518 | 2504 | 58    |
| H(29B) | 8318  | 2130 | 3157 | 58    |
| H(29C) | 9342  | 2747 | 3347 | 58    |
| H(30)  | 6985  | 2987 | 1765 | 40    |
| H(32A) | 3659  | 3257 | 939  | 89    |
| H(32B) | 5114  | 3790 | 1032 | 89    |
| H(32C) | 3052  | 3885 | 1276 | 89    |
| H(33)  | 2393  | 3703 | 2533 | 41    |
| H(35A) | 1650  | 3667 | 3747 | 53    |
| H(35B) | 3414  | 3810 | 4280 | 53    |
| H(35C) | 2543  | 3153 | 4265 | 53    |



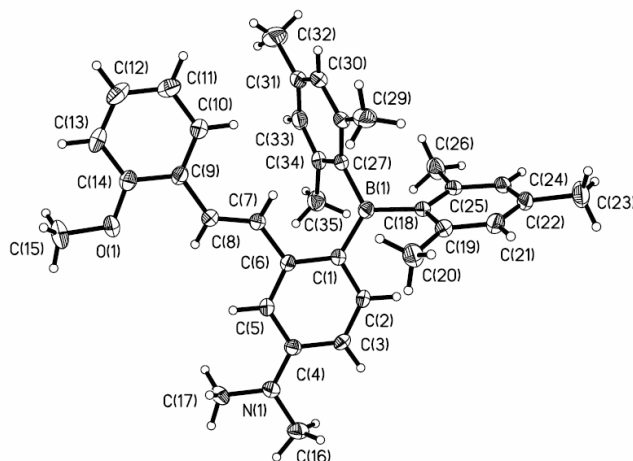

**Figure S152.** Structure of **3a**.

**Table S77.** Crystal data and structure refinement for **4a**.

|                                   |                                             |                 |
|-----------------------------------|---------------------------------------------|-----------------|
| Identification code               | <b>4a</b>                                   |                 |
| Empirical formula                 | C <sub>34</sub> H <sub>38</sub> B N         |                 |
| Formula weight                    | 471.46                                      |                 |
| Temperature                       | 180(2) K                                    |                 |
| Wavelength                        | 0.71073 Å                                   |                 |
| Crystal system                    | Triclinic                                   |                 |
| Space group                       | P-1                                         |                 |
| Unit cell dimensions              | a = 7.868(2) Å                              | α = 69.575(8)°. |
|                                   | b = 12.043(4) Å                             | β = 77.359(8)°. |
|                                   | c = 16.695(5) Å                             | γ = 76.219(9)°. |
| Volume                            | 1423.6(7) Å <sup>3</sup>                    |                 |
| Z                                 | 2                                           |                 |
| Density (calculated)              | 1.100 Mg/m <sup>3</sup>                     |                 |
| Absorption coefficient            | 0.062 mm <sup>-1</sup>                      |                 |
| F(000)                            | 508                                         |                 |
| Crystal size                      | 0.150 x 0.100 x 0.100 mm <sup>3</sup>       |                 |
| Theta range for data collection   | 2.818 to 27.245°.                           |                 |
| Index ranges                      | -10 ≤ h ≤ 10, -15 ≤ k ≤ 15, -21 ≤ l ≤ 21    |                 |
| Reflections collected             | 15953                                       |                 |
| Independent reflections           | 6179 [R(int) = 0.1175]                      |                 |
| Completeness to theta = 25.242°   | 98.7 %                                      |                 |
| Absorption correction             | Semi-empirical from equivalents             |                 |
| Max. and min. transmission        | 0.994 and 0.991                             |                 |
| Refinement method                 | Full-matrix least-squares on F <sup>2</sup> |                 |
| Data / restraints / parameters    | 6179 / 0 / 326                              |                 |
| Goodness-of-fit on F <sup>2</sup> | 1.032                                       |                 |
| Final R indices [I > 2σ(I)]       | R1 = 0.0900, wR2 = 0.1975                   |                 |
| R indices (all data)              | R1 = 0.2064, wR2 = 0.2380                   |                 |
| Extinction coefficient            | 0.020(4)                                    |                 |
| Largest diff. peak and hole       | 0.311 and -0.284 e.Å <sup>-3</sup>          |                 |

**Table S78.** Atomic coordinates ( $\times 10^4$ ) and equivalent isotropic displacement parameters ( $\text{Å}^2 \times 10^3$ ) for **4a**.  $U(\text{eq})$  is defined as one third of the trace of the orthogonalized  $U^{ij}$  tensor.

| x | y | z | $U(\text{eq})$ |
|---|---|---|----------------|
|---|---|---|----------------|

|       |         |          |         |       |
|-------|---------|----------|---------|-------|
| B(1)  | 2672(5) | 3675(3)  | 2494(3) | 30(1) |
| N(1)  | 4113(4) | 3599(3)  | 5767(2) | 45(1) |
| C(1)  | 3223(4) | 3644(3)  | 3335(2) | 29(1) |
| C(2)  | 2269(4) | 4485(3)  | 3757(2) | 33(1) |
| C(3)  | 2500(4) | 4486(3)  | 4546(2) | 34(1) |
| C(4)  | 3824(4) | 3620(3)  | 4984(2) | 31(1) |
| C(5)  | 4859(4) | 2800(3)  | 4572(2) | 32(1) |
| C(6)  | 4579(4) | 2782(3)  | 3785(2) | 29(1) |
| C(7)  | 5756(4) | 1878(3)  | 3399(2) | 32(1) |
| C(8)  | 6519(4) | 784(3)   | 3830(2) | 35(1) |
| C(9)  | 7634(4) | -130(3)  | 3453(2) | 33(1) |
| C(10) | 8481(5) | -1189(3) | 3986(2) | 40(1) |
| C(11) | 9506(5) | -2087(3) | 3651(3) | 47(1) |
| C(12) | 9686(5) | -1941(3) | 2796(3) | 53(1) |
| C(13) | 8870(6) | -905(4)  | 2258(3) | 57(1) |
| C(14) | 7841(5) | -1(3)    | 2578(2) | 51(1) |
| C(15) | 5296(6) | 2608(4)  | 6266(3) | 65(1) |
| C(16) | 3077(5) | 4448(4)  | 6201(2) | 52(1) |
| C(17) | 1701(4) | 4904(3)  | 1899(2) | 30(1) |
| C(18) | 2474(4) | 5946(3)  | 1576(2) | 30(1) |
| C(19) | 1701(5) | 6975(3)  | 975(2)  | 38(1) |
| C(20) | 161(5)  | 7035(4)  | 683(2)  | 48(1) |
| C(21) | -622(5) | 6027(4)  | 1021(3) | 56(1) |
| C(22) | 97(5)   | 4971(3)  | 1616(3) | 43(1) |
| C(23) | -889(5) | 3923(4)  | 1950(3) | 72(2) |
| C(24) | 4189(5) | 5997(3)  | 1808(2) | 43(1) |
| C(25) | -619(7) | 8160(4)  | 20(3)   | 88(2) |
| C(26) | 3034(4) | 2515(3)  | 2202(2) | 28(1) |
| C(27) | 4026(5) | 2509(3)  | 1384(2) | 32(1) |
| C(28) | 4347(5) | 1487(3)  | 1130(2) | 38(1) |
| C(29) | 3688(5) | 462(3)   | 1640(2) | 41(1) |
| C(30) | 2697(5) | 472(3)   | 2430(2) | 41(1) |
| C(31) | 2390(5) | 1459(3)  | 2727(2) | 35(1) |
| C(32) | 1335(6) | 1349(4)  | 3612(2) | 53(1) |
| C(33) | 4019(7) | -635(3)  | 1345(3) | 68(1) |
| C(34) | 4811(6) | 3589(3)  | 785(2)  | 53(1) |

**Table S79.** Bond lengths [Å] and angles [°] for **4a**.

|            |          |              |          |
|------------|----------|--------------|----------|
| B(1)-C(1)  | 1.543(5) | C(6)-C(7)    | 1.484(4) |
| B(1)-C(26) | 1.580(5) | C(7)-C(8)    | 1.329(4) |
| B(1)-C(17) | 1.590(5) | C(7)-H(7A)   | 0.9500   |
| N(1)-C(4)  | 1.366(4) | C(8)-C(9)    | 1.469(4) |
| N(1)-C(16) | 1.447(4) | C(8)-H(8A)   | 0.9500   |
| N(1)-C(15) | 1.450(4) | C(9)-C(10)   | 1.387(4) |
| C(1)-C(2)  | 1.410(4) | C(9)-C(14)   | 1.392(5) |
| C(1)-C(6)  | 1.435(4) | C(10)-C(11)  | 1.393(5) |
| C(2)-C(3)  | 1.369(4) | C(10)-H(10A) | 0.9500   |
| C(2)-H(2A) | 0.9500   | C(11)-C(12)  | 1.355(5) |
| C(3)-C(4)  | 1.411(4) | C(11)-H(11A) | 0.9500   |
| C(3)-H(3A) | 0.9500   | C(12)-C(13)  | 1.365(5) |
| C(4)-C(5)  | 1.399(4) | C(12)-H(12A) | 0.9500   |
| C(5)-C(6)  | 1.388(4) | C(13)-C(14)  | 1.386(5) |
| C(5)-H(5A) | 0.9500   | C(13)-H(13A) | 0.9500   |

|                  |          |                     |          |
|------------------|----------|---------------------|----------|
| C(14)-H(14A)     | 0.9500   | C(3)-C(2)-C(1)      | 125.2(3) |
| C(15)-H(15A)     | 0.9800   | C(3)-C(2)-H(2A)     | 117.4    |
| C(15)-H(15B)     | 0.9800   | C(1)-C(2)-H(2A)     | 117.4    |
| C(15)-H(15C)     | 0.9800   | C(2)-C(3)-C(4)      | 119.7(3) |
| C(16)-H(16A)     | 0.9800   | C(2)-C(3)-H(3A)     | 120.2    |
| C(16)-H(16B)     | 0.9800   | C(4)-C(3)-H(3A)     | 120.2    |
| C(16)-H(16C)     | 0.9800   | N(1)-C(4)-C(5)      | 121.3(3) |
| C(17)-C(18)      | 1.408(5) | N(1)-C(4)-C(3)      | 121.5(3) |
| C(17)-C(22)      | 1.416(5) | C(5)-C(4)-C(3)      | 117.1(3) |
| C(18)-C(19)      | 1.398(4) | C(6)-C(5)-C(4)      | 122.8(3) |
| C(18)-C(24)      | 1.503(5) | C(6)-C(5)-H(5A)     | 118.6    |
| C(19)-C(20)      | 1.380(5) | C(4)-C(5)-H(5A)     | 118.6    |
| C(19)-H(19A)     | 0.9500   | C(5)-C(6)-C(1)      | 120.9(3) |
| C(20)-C(21)      | 1.378(6) | C(5)-C(6)-C(7)      | 118.6(3) |
| C(20)-C(25)      | 1.513(5) | C(1)-C(6)-C(7)      | 120.4(3) |
| C(21)-C(22)      | 1.394(5) | C(8)-C(7)-C(6)      | 126.2(3) |
| C(21)-H(21A)     | 0.9500   | C(8)-C(7)-H(7A)     | 116.9    |
| C(22)-C(23)      | 1.514(6) | C(6)-C(7)-H(7A)     | 116.9    |
| C(23)-H(23A)     | 0.9800   | C(7)-C(8)-C(9)      | 126.4(3) |
| C(23)-H(23B)     | 0.9800   | C(7)-C(8)-H(8A)     | 116.8    |
| C(23)-H(23C)     | 0.9800   | C(9)-C(8)-H(8A)     | 116.8    |
| C(24)-H(24A)     | 0.9800   | C(10)-C(9)-C(14)    | 117.6(3) |
| C(24)-H(24B)     | 0.9800   | C(10)-C(9)-C(8)     | 119.6(3) |
| C(24)-H(24C)     | 0.9800   | C(14)-C(9)-C(8)     | 122.8(3) |
| C(25)-H(25A)     | 0.9800   | C(9)-C(10)-C(11)    | 120.9(4) |
| C(25)-H(25B)     | 0.9800   | C(9)-C(10)-H(10A)   | 119.5    |
| C(25)-H(25C)     | 0.9800   | C(11)-C(10)-H(10A)  | 119.5    |
| C(26)-C(31)      | 1.406(5) | C(12)-C(11)-C(10)   | 120.4(3) |
| C(26)-C(27)      | 1.418(5) | C(12)-C(11)-H(11A)  | 119.8    |
| C(27)-C(28)      | 1.389(5) | C(10)-C(11)-H(11A)  | 119.8    |
| C(27)-C(34)      | 1.509(5) | C(11)-C(12)-C(13)   | 119.9(3) |
| C(28)-C(29)      | 1.377(5) | C(11)-C(12)-H(12A)  | 120.1    |
| C(28)-H(28A)     | 0.9500   | C(13)-C(12)-H(12A)  | 120.1    |
| C(29)-C(30)      | 1.379(5) | C(12)-C(13)-C(14)   | 120.8(4) |
| C(29)-C(33)      | 1.513(5) | C(12)-C(13)-H(13A)  | 119.6    |
| C(30)-C(31)      | 1.393(5) | C(14)-C(13)-H(13A)  | 119.6    |
| C(30)-H(30A)     | 0.9500   | C(13)-C(14)-C(9)    | 120.5(3) |
| C(31)-C(32)      | 1.506(5) | C(13)-C(14)-H(14A)  | 119.8    |
| C(32)-H(32A)     | 0.9800   | C(9)-C(14)-H(14A)   | 119.8    |
| C(32)-H(32B)     | 0.9800   | N(1)-C(15)-H(15A)   | 109.5    |
| C(32)-H(32C)     | 0.9800   | N(1)-C(15)-H(15B)   | 109.5    |
| C(33)-H(33A)     | 0.9800   | H(15A)-C(15)-H(15B) | 109.5    |
| C(33)-H(33B)     | 0.9800   | N(1)-C(15)-H(15C)   | 109.5    |
| C(33)-H(33C)     | 0.9800   | H(15A)-C(15)-H(15C) | 109.5    |
| C(34)-H(34A)     | 0.9800   | H(15B)-C(15)-H(15C) | 109.5    |
| C(34)-H(34B)     | 0.9800   | N(1)-C(16)-H(16A)   | 109.5    |
| C(34)-H(34C)     | 0.9800   | N(1)-C(16)-H(16B)   | 109.5    |
| C(1)-B(1)-C(26)  | 122.0(3) | H(16A)-C(16)-H(16B) | 109.5    |
| C(1)-B(1)-C(17)  | 119.6(3) | N(1)-C(16)-H(16C)   | 109.5    |
| C(26)-B(1)-C(17) | 118.4(3) | H(16A)-C(16)-H(16C) | 109.5    |
| C(4)-N(1)-C(16)  | 122.4(3) | H(16B)-C(16)-H(16C) | 109.5    |
| C(4)-N(1)-C(15)  | 120.8(3) | C(18)-C(17)-C(22)   | 117.2(3) |
| C(16)-N(1)-C(15) | 116.1(3) | C(18)-C(17)-B(1)    | 121.1(3) |
| C(2)-C(1)-C(6)   | 114.2(3) | C(22)-C(17)-B(1)    | 121.4(3) |
| C(2)-C(1)-B(1)   | 119.2(3) | C(19)-C(18)-C(17)   | 120.2(3) |
| C(6)-C(1)-B(1)   | 126.5(3) | C(19)-C(18)-C(24)   | 116.7(3) |

|                     |          |                     |          |
|---------------------|----------|---------------------|----------|
| C(17)-C(18)-C(24)   | 123.0(3) | C(28)-C(27)-C(26)   | 120.4(3) |
| C(20)-C(19)-C(18)   | 122.7(4) | C(28)-C(27)-C(34)   | 118.5(3) |
| C(20)-C(19)-H(19A)  | 118.6    | C(26)-C(27)-C(34)   | 121.1(3) |
| C(18)-C(19)-H(19A)  | 118.6    | C(29)-C(28)-C(27)   | 122.1(4) |
| C(21)-C(20)-C(19)   | 116.9(3) | C(29)-C(28)-H(28A)  | 119.0    |
| C(21)-C(20)-C(25)   | 122.0(4) | C(27)-C(28)-H(28A)  | 119.0    |
| C(19)-C(20)-C(25)   | 121.1(4) | C(28)-C(29)-C(30)   | 117.7(3) |
| C(20)-C(21)-C(22)   | 122.9(4) | C(28)-C(29)-C(33)   | 121.4(4) |
| C(20)-C(21)-H(21A)  | 118.5    | C(30)-C(29)-C(33)   | 120.9(4) |
| C(22)-C(21)-H(21A)  | 118.5    | C(29)-C(30)-C(31)   | 122.4(3) |
| C(21)-C(22)-C(17)   | 120.0(4) | C(29)-C(30)-H(30A)  | 118.8    |
| C(21)-C(22)-C(23)   | 118.2(4) | C(31)-C(30)-H(30A)  | 118.8    |
| C(17)-C(22)-C(23)   | 121.8(3) | C(30)-C(31)-C(26)   | 120.1(3) |
| C(22)-C(23)-H(23A)  | 109.5    | C(30)-C(31)-C(32)   | 117.6(3) |
| C(22)-C(23)-H(23B)  | 109.5    | C(26)-C(31)-C(32)   | 122.3(3) |
| H(23A)-C(23)-H(23B) | 109.5    | C(31)-C(32)-H(32A)  | 109.5    |
| C(22)-C(23)-H(23C)  | 109.5    | C(31)-C(32)-H(32B)  | 109.5    |
| H(23A)-C(23)-H(23C) | 109.5    | H(32A)-C(32)-H(32B) | 109.5    |
| H(23B)-C(23)-H(23C) | 109.5    | C(31)-C(32)-H(32C)  | 109.5    |
| C(18)-C(24)-H(24A)  | 109.5    | H(32A)-C(32)-H(32C) | 109.5    |
| C(18)-C(24)-H(24B)  | 109.5    | H(32B)-C(32)-H(32C) | 109.5    |
| H(24A)-C(24)-H(24B) | 109.5    | C(29)-C(33)-H(33A)  | 109.5    |
| C(18)-C(24)-H(24C)  | 109.5    | C(29)-C(33)-H(33B)  | 109.5    |
| H(24A)-C(24)-H(24C) | 109.5    | H(33A)-C(33)-H(33B) | 109.5    |
| H(24B)-C(24)-H(24C) | 109.5    | C(29)-C(33)-H(33C)  | 109.5    |
| C(20)-C(25)-H(25A)  | 109.5    | H(33A)-C(33)-H(33C) | 109.5    |
| C(20)-C(25)-H(25B)  | 109.5    | H(33B)-C(33)-H(33C) | 109.5    |
| H(25A)-C(25)-H(25B) | 109.5    | C(27)-C(34)-H(34A)  | 109.5    |
| C(20)-C(25)-H(25C)  | 109.5    | C(27)-C(34)-H(34B)  | 109.5    |
| H(25A)-C(25)-H(25C) | 109.5    | H(34A)-C(34)-H(34B) | 109.5    |
| H(25B)-C(25)-H(25C) | 109.5    | C(27)-C(34)-H(34C)  | 109.5    |
| C(31)-C(26)-C(27)   | 117.3(3) | H(34A)-C(34)-H(34C) | 109.5    |
| C(31)-C(26)-B(1)    | 122.2(3) | H(34B)-C(34)-H(34C) | 109.5    |
| C(27)-C(26)-B(1)    | 120.5(3) |                     |          |

**Table S80.** Anisotropic displacement parameters ( $\text{\AA}^2 \times 10^3$ ) for **4a**. The anisotropic displacement factor exponent takes the form:  $-2\pi^2 [h^2 a^{*2} U^{11} + \dots + 2 h k a^* b^* U^{12}]$

|       | U <sup>11</sup> | U <sup>22</sup> | U <sup>33</sup> | U <sup>23</sup> | U <sup>13</sup> | U <sup>12</sup> |
|-------|-----------------|-----------------|-----------------|-----------------|-----------------|-----------------|
| B(1)  | 21(2)           | 31(2)           | 35(2)           | -12(2)          | 4(2)            | -7(2)           |
| N(1)  | 54(2)           | 44(2)           | 42(2)           | -23(2)          | -17(2)          | 6(2)            |
| C(1)  | 26(2)           | 28(2)           | 36(2)           | -15(2)          | -3(2)           | -4(2)           |
| C(2)  | 31(2)           | 30(2)           | 34(2)           | -16(2)          | -5(2)           | 8(2)            |
| C(3)  | 31(2)           | 30(2)           | 40(2)           | -21(2)          | -2(2)           | 4(2)            |
| C(4)  | 31(2)           | 26(2)           | 39(2)           | -12(2)          | -3(2)           | -7(2)           |
| C(5)  | 29(2)           | 27(2)           | 41(2)           | -14(2)          | -8(2)           | 1(2)            |
| C(6)  | 27(2)           | 25(2)           | 35(2)           | -14(2)          | -3(2)           | -3(2)           |
| C(7)  | 27(2)           | 32(2)           | 36(2)           | -16(2)          | -3(2)           | 1(2)            |
| C(8)  | 37(2)           | 33(2)           | 35(2)           | -15(2)          | -4(2)           | 0(2)            |
| C(9)  | 29(2)           | 26(2)           | 43(2)           | -14(2)          | -7(2)           | 3(2)            |
| C(10) | 45(2)           | 31(2)           | 40(2)           | -12(2)          | -2(2)           | 0(2)            |
| C(11) | 44(2)           | 26(2)           | 59(3)           | -9(2)           | -1(2)           | 7(2)            |
| C(12) | 51(3)           | 33(2)           | 70(3)           | -29(2)          | 10(2)           | 3(2)            |

|       |        |       |        |        |        |        |
|-------|--------|-------|--------|--------|--------|--------|
| C(13) | 73(3)  | 47(3) | 44(2)  | -26(2) | -2(2)  | 11(2)  |
| C(14) | 59(3)  | 43(2) | 44(2)  | -18(2) | -14(2) | 18(2)  |
| C(15) | 85(3)  | 62(3) | 52(3)  | -24(2) | -34(3) | 9(3)   |
| C(16) | 57(3)  | 59(3) | 52(3)  | -34(2) | -9(2)  | -5(2)  |
| C(17) | 27(2)  | 34(2) | 31(2)  | -19(2) | -4(2)  | 1(2)   |
| C(18) | 30(2)  | 29(2) | 35(2)  | -20(2) | -5(2)  | 1(2)   |
| C(19) | 46(2)  | 30(2) | 34(2)  | -14(2) | -3(2)  | 3(2)   |
| C(20) | 49(3)  | 45(2) | 43(2)  | -11(2) | -20(2) | 10(2)  |
| C(21) | 35(2)  | 65(3) | 70(3)  | -24(2) | -24(2) | 3(2)   |
| C(22) | 28(2)  | 48(2) | 56(3)  | -20(2) | -11(2) | 0(2)   |
| C(23) | 35(2)  | 70(3) | 121(4) | -29(3) | -22(3) | -15(2) |
| C(24) | 44(2)  | 34(2) | 55(2)  | -18(2) | -14(2) | -6(2)  |
| C(25) | 93(4)  | 67(3) | 88(4)  | -4(3)  | -51(3) | 17(3)  |
| C(26) | 32(2)  | 24(2) | 29(2)  | -7(1)  | -7(2)  | -5(2)  |
| C(27) | 37(2)  | 27(2) | 33(2)  | -11(2) | -7(2)  | -4(2)  |
| C(28) | 49(2)  | 35(2) | 32(2)  | -16(2) | -6(2)  | -3(2)  |
| C(29) | 54(3)  | 30(2) | 43(2)  | -17(2) | -14(2) | -1(2)  |
| C(30) | 55(3)  | 25(2) | 44(2)  | -5(2)  | -15(2) | -12(2) |
| C(31) | 40(2)  | 33(2) | 34(2)  | -10(2) | -11(2) | -7(2)  |
| C(32) | 68(3)  | 53(3) | 42(2)  | -14(2) | 6(2)   | -29(2) |
| C(33) | 108(4) | 38(2) | 66(3)  | -27(2) | -16(3) | -9(3)  |
| C(34) | 70(3)  | 41(2) | 44(2)  | -20(2) | 19(2)  | -17(2) |

**Table S81.** Hydrogen coordinates ( $\times 10^4$ ) and isotropic displacement parameters ( $\text{\AA}^2 \times 10^3$ ) for **4a**.

|        | x     | y     | z    | U(eq) |
|--------|-------|-------|------|-------|
| H(2A)  | 1397  | 5101  | 3470 | 39    |
| H(3A)  | 1773  | 5067  | 4797 | 40    |
| H(5A)  | 5792  | 2231  | 4843 | 39    |
| H(7A)  | 5984  | 2104  | 2786 | 38    |
| H(8A)  | 6325  | 571   | 4443 | 42    |
| H(10A) | 8361  | -1304 | 4587 | 48    |
| H(11A) | 10081 | -2806 | 4024 | 57    |
| H(12A) | 10378 | -2559 | 2571 | 64    |
| H(13A) | 9009  | -802  | 1658 | 68    |
| H(14A) | 7272  | 711   | 2196 | 61    |
| H(15A) | 5340  | 2745  | 6805 | 97    |
| H(15B) | 4864  | 1855  | 6399 | 97    |
| H(15C) | 6485  | 2553  | 5930 | 97    |
| H(16A) | 3495  | 4279  | 6750 | 78    |
| H(16B) | 3208  | 5268  | 5834 | 78    |
| H(16C) | 1828  | 4371  | 6312 | 78    |
| H(19A) | 2259  | 7662  | 758  | 45    |
| H(21A) | -1699 | 6051  | 841  | 67    |
| H(23A) | -238  | 3247  | 2360 | 109   |
| H(23B) | -2072 | 4168  | 2241 | 109   |
| H(23C) | -996  | 3677  | 1464 | 109   |
| H(24A) | 4603  | 5231  | 2231 | 64    |
| H(24B) | 5076  | 6144  | 1287 | 64    |
| H(24C) | 4005  | 6651  | 2056 | 64    |
| H(25A) | 129   | 8771  | -138 | 131   |
| H(25B) | -678  | 7967  | -496 | 131   |
| H(25C) | -1813 | 8471  | 265  | 131   |

|        |      |       |      |     |
|--------|------|-------|------|-----|
| H(28A) | 5043 | 1495  | 586  | 46  |
| H(30A) | 2207 | -220  | 2784 | 49  |
| H(32A) | 1214 | 2099  | 3742 | 80  |
| H(32B) | 159  | 1196  | 3625 | 80  |
| H(32C) | 1947 | 681   | 4043 | 80  |
| H(33A) | 3449 | -1269 | 1793 | 102 |
| H(33B) | 3527 | -420  | 809  | 102 |
| H(33C) | 5296 | -927  | 1243 | 102 |
| H(34A) | 4477 | 4238  | 1047 | 80  |
| H(34B) | 6103 | 3367  | 687  | 80  |
| H(34C) | 4362 | 3864  | 232  | 80  |

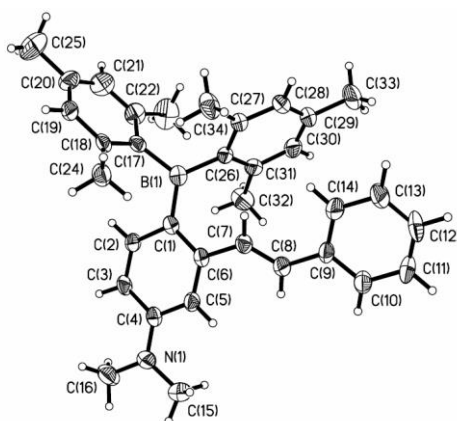

**Figure S153.** Structure of **4a**.

**Table S82.** Crystal data and structure refinement for **5a**.

|                                 |                                                               |                                         |
|---------------------------------|---------------------------------------------------------------|-----------------------------------------|
| Identification code             | <b>5a</b>                                                     |                                         |
| Empirical formula               | C <sub>31</sub> H <sub>32</sub> B <sub>1</sub> N <sub>1</sub> |                                         |
| Formula weight                  | 429.39                                                        |                                         |
| Temperature                     | 230(2) K                                                      |                                         |
| Wavelength                      | 0.71073 Å                                                     |                                         |
| Crystal system                  | Monoclinic                                                    |                                         |
| Space group                     | P2 <sub>1</sub> /c                                            |                                         |
| Unit cell dimensions            | a = 11.8634(7) Å<br>b = 11.8780(8) Å<br>c = 18.2134(11) Å     | α = 90°.<br>β = 92.179(2)°.<br>γ = 90°. |
| Volume                          | 2564.7(3) Å <sup>3</sup>                                      |                                         |
| Z                               | 4                                                             |                                         |
| Density (calculated)            | 1.112 Mg/m <sup>3</sup>                                       |                                         |
| Absorption coefficient          | 0.063 mm <sup>-1</sup>                                        |                                         |
| F(000)                          | 920                                                           |                                         |
| Crystal size                    | 0.548 x 0.423 x 0.358 mm <sup>3</sup>                         |                                         |
| Theta range for data collection | 2.645 to 27.173°.                                             |                                         |
| Index ranges                    | -15 ≤ h ≤ 15, -15 ≤ k ≤ 15, -23 ≤ l ≤ 23                      |                                         |
| Reflections collected           | 47866                                                         |                                         |
| Independent reflections         | 5664 [R(int) = 0.0592]                                        |                                         |
| Completeness to theta = 25.242° | 99.7 %                                                        |                                         |
| Absorption correction           | Semi-empirical from equivalents                               |                                         |
| Max. and min. transmission      | 0.978 and 0.966                                               |                                         |
| Refinement method               | Full-matrix least-squares on F <sup>2</sup>                   |                                         |

|                                      |                                    |
|--------------------------------------|------------------------------------|
| Data / restraints / parameters       | 5664 / 0 / 304                     |
| Goodness-of-fit on $F^2$             | 1.063                              |
| Final R indices [ $I > 2\sigma(I)$ ] | R1 = 0.0581, wR2 = 0.1450          |
| R indices (all data)                 | R1 = 0.0841, wR2 = 0.1595          |
| Extinction coefficient               | n/a                                |
| Largest diff. peak and hole          | 0.225 and -0.225 e.Å <sup>-3</sup> |

**Table S83.** Atomic coordinates ( $\times 10^4$ ) and equivalent isotropic displacement parameters ( $\text{Å}^2 \times 10^3$ ) for **5a**.  $U(\text{eq})$  is defined as one third of the trace of the orthogonalized  $U_{ij}$  tensor.

|       | x        | y       | z        | U(eq)  |
|-------|----------|---------|----------|--------|
| B(1)  | 6216(1)  | 7232(1) | 9239(1)  | 32(1)  |
| N(1)  | 10924(1) | 8561(2) | 11013(1) | 72(1)  |
| C(1)  | 6063(1)  | 7478(1) | 10080(1) | 32(1)  |
| C(2)  | 4991(1)  | 7271(1) | 10350(1) | 37(1)  |
| C(3)  | 4778(2)  | 7332(2) | 11090(1) | 44(1)  |
| C(4)  | 5630(2)  | 7648(2) | 11581(1) | 47(1)  |
| C(5)  | 6683(2)  | 7906(2) | 11335(1) | 44(1)  |
| C(6)  | 6930(1)  | 7808(1) | 10591(1) | 35(1)  |
| C(7)  | 8062(1)  | 8072(2) | 10350(1) | 41(1)  |
| C(8)  | 8996(2)  | 8130(2) | 10755(1) | 55(1)  |
| C(9)  | 10125(2) | 8359(2) | 10494(1) | 52(1)  |
| C(10) | 10369(2) | 8360(3) | 9767(1)  | 103(1) |
| C(11) | 11454(2) | 8580(3) | 9560(2)  | 112(1) |
| C(12) | 12267(2) | 8778(2) | 10084(2) | 71(1)  |
| C(13) | 11965(2) | 8768(2) | 10788(2) | 74(1)  |
| C(14) | 5150(1)  | 7491(1) | 8718(1)  | 31(1)  |
| C(15) | 4731(1)  | 8598(1) | 8648(1)  | 37(1)  |
| C(16) | 5334(2)  | 9590(2) | 8996(1)  | 50(1)  |
| C(17) | 3753(1)  | 8810(2) | 8230(1)  | 44(1)  |
| C(18) | 3138(1)  | 7960(2) | 7886(1)  | 45(1)  |
| C(19) | 2060(2)  | 8223(2) | 7449(1)  | 72(1)  |
| C(20) | 3542(1)  | 6873(2) | 7958(1)  | 42(1)  |
| C(21) | 4538(1)  | 6624(1) | 8355(1)  | 35(1)  |
| C(22) | 4909(2)  | 5417(2) | 8406(1)  | 52(1)  |
| C(23) | 7338(1)  | 6688(1) | 8959(1)  | 37(1)  |
| C(24) | 7942(1)  | 7199(2) | 8390(1)  | 42(1)  |
| C(25) | 7598(2)  | 8318(2) | 8070(1)  | 52(1)  |
| C(26) | 8932(2)  | 6712(2) | 8156(1)  | 56(1)  |
| C(27) | 9361(2)  | 5733(2) | 8460(1)  | 65(1)  |
| C(28) | 10443(2) | 5211(3) | 8194(2)  | 104(1) |
| C(29) | 8785(2)  | 5238(2) | 9021(1)  | 61(1)  |
| C(30) | 7789(1)  | 5696(2) | 9278(1)  | 45(1)  |
| C(31) | 7229(2)  | 5084(2) | 9894(1)  | 60(1)  |

**Table S84.** Bond lengths [ $\text{Å}$ ] and angles [ $^\circ$ ] for **5a**.

|            |          |           |          |
|------------|----------|-----------|----------|
| B(1)-C(1)  | 1.577(2) | C(1)-C(2) | 1.403(2) |
| B(1)-C(23) | 1.581(2) | C(1)-C(6) | 1.416(2) |
| B(1)-C(14) | 1.582(2) | C(2)-C(3) | 1.382(2) |
| N(1)-C(9)  | 1.334(2) | C(3)-C(4) | 1.376(3) |
| N(1)-C(13) | 1.339(3) | C(4)-C(5) | 1.377(3) |

|                  |            |                   |            |
|------------------|------------|-------------------|------------|
| C(5)-C(6)        | 1.402(2)   | C(1)-C(6)-C(7)    | 120.93(14) |
| C(6)-C(7)        | 1.463(2)   | C(8)-C(7)-C(6)    | 127.51(16) |
| C(7)-C(8)        | 1.310(2)   | C(7)-C(8)-C(9)    | 126.33(17) |
| C(8)-C(9)        | 1.462(3)   | N(1)-C(9)-C(10)   | 120.98(19) |
| C(9)-C(10)       | 1.367(3)   | N(1)-C(9)-C(8)    | 115.98(18) |
| C(10)-C(11)      | 1.379(3)   | C(10)-C(9)-C(8)   | 123.04(18) |
| C(11)-C(12)      | 1.351(3)   | C(9)-C(10)-C(11)  | 119.9(2)   |
| C(12)-C(13)      | 1.345(3)   | C(12)-C(11)-C(10) | 119.3(2)   |
| C(14)-C(15)      | 1.409(2)   | C(13)-C(12)-C(11) | 117.6(2)   |
| C(14)-C(21)      | 1.410(2)   | N(1)-C(13)-C(12)  | 125.1(2)   |
| C(15)-C(17)      | 1.387(2)   | C(15)-C(14)-C(21) | 117.73(14) |
| C(15)-C(16)      | 1.506(2)   | C(15)-C(14)-B(1)  | 120.45(13) |
| C(17)-C(18)      | 1.381(3)   | C(21)-C(14)-B(1)  | 121.65(14) |
| C(18)-C(20)      | 1.382(3)   | C(17)-C(15)-C(14) | 120.26(15) |
| C(18)-C(19)      | 1.514(2)   | C(17)-C(15)-C(16) | 117.59(15) |
| C(20)-C(21)      | 1.393(2)   | C(14)-C(15)-C(16) | 122.12(14) |
| C(21)-C(22)      | 1.501(2)   | C(18)-C(17)-C(15) | 122.16(17) |
| C(23)-C(30)      | 1.411(2)   | C(17)-C(18)-C(20) | 117.70(15) |
| C(23)-C(24)      | 1.418(2)   | C(17)-C(18)-C(19) | 120.54(18) |
| C(24)-C(26)      | 1.390(3)   | C(20)-C(18)-C(19) | 121.76(18) |
| C(24)-C(25)      | 1.502(3)   | C(18)-C(20)-C(21) | 122.14(16) |
| C(26)-C(27)      | 1.377(3)   | C(20)-C(21)-C(14) | 119.98(15) |
| C(27)-C(29)      | 1.382(3)   | C(20)-C(21)-C(22) | 118.40(15) |
| C(27)-C(28)      | 1.522(3)   | C(14)-C(21)-C(22) | 121.58(15) |
| C(29)-C(30)      | 1.397(3)   | C(30)-C(23)-C(24) | 117.68(15) |
| C(30)-C(31)      | 1.511(3)   | C(30)-C(23)-B(1)  | 121.26(15) |
| C(1)-B(1)-C(23)  | 121.25(14) | C(24)-C(23)-B(1)  | 121.03(15) |
| C(1)-B(1)-C(14)  | 115.32(13) | C(26)-C(24)-C(23) | 120.11(18) |
| C(23)-B(1)-C(14) | 123.30(13) | C(26)-C(24)-C(25) | 117.99(17) |
| C(9)-N(1)-C(13)  | 117.1(2)   | C(23)-C(24)-C(25) | 121.70(15) |
| C(2)-C(1)-C(6)   | 117.66(14) | C(27)-C(26)-C(24) | 122.17(19) |
| C(2)-C(1)-B(1)   | 116.57(14) | C(26)-C(27)-C(29) | 118.06(18) |
| C(6)-C(1)-B(1)   | 125.60(13) | C(26)-C(27)-C(28) | 121.3(2)   |
| C(3)-C(2)-C(1)   | 122.24(16) | C(29)-C(27)-C(28) | 120.6(3)   |
| C(4)-C(3)-C(2)   | 119.45(16) | C(27)-C(29)-C(30) | 122.0(2)   |
| C(3)-C(4)-C(5)   | 120.12(15) | C(29)-C(30)-C(23) | 119.93(18) |
| C(4)-C(5)-C(6)   | 121.47(16) | C(29)-C(30)-C(31) | 117.61(18) |
| C(5)-C(6)-C(1)   | 118.96(15) | C(23)-C(30)-C(31) | 122.46(16) |
| C(5)-C(6)-C(7)   | 120.10(15) |                   |            |

**Table S85.** Anisotropic displacement parameters ( $\text{\AA}^2 \times 10^3$ ) for **5a**. The anisotropic displacement factor exponent takes the form:  $-2\pi^2 [h^2 a^{*2} U^{11} + \dots + 2 h k a^* b^* U^{12}]$

|      | U <sup>11</sup> | U <sup>22</sup> | U <sup>33</sup> | U <sup>23</sup> | U <sup>13</sup> | U <sup>12</sup> |
|------|-----------------|-----------------|-----------------|-----------------|-----------------|-----------------|
| B(1) | 31(1)           | 32(1)           | 33(1)           | 1(1)            | 5(1)            | -7(1)           |
| N(1) | 44(1)           | 105(2)          | 64(1)           | 3(1)            | -17(1)          | -9(1)           |
| C(1) | 31(1)           | 35(1)           | 31(1)           | 3(1)            | 4(1)            | 2(1)            |
| C(2) | 33(1)           | 40(1)           | 38(1)           | 4(1)            | 7(1)            | 2(1)            |
| C(3) | 40(1)           | 48(1)           | 44(1)           | 11(1)           | 18(1)           | 8(1)            |
| C(4) | 58(1)           | 55(1)           | 30(1)           | 5(1)            | 14(1)           | 17(1)           |
| C(5) | 47(1)           | 53(1)           | 31(1)           | -2(1)           | -2(1)           | 10(1)           |
| C(6) | 36(1)           | 39(1)           | 31(1)           | 1(1)            | 2(1)            | 4(1)            |
| C(7) | 37(1)           | 53(1)           | 33(1)           | -4(1)           | 0(1)            | -3(1)           |



|       |       |        |        |        |        |        |
|-------|-------|--------|--------|--------|--------|--------|
| C(8)  | 42(1) | 84(2)  | 39(1)  | 2(1)   | -4(1)  | -5(1)  |
| C(9)  | 36(1) | 71(1)  | 50(1)  | -5(1)  | -7(1)  | -5(1)  |
| C(10) | 43(1) | 211(4) | 55(1)  | -31(2) | 2(1)   | -32(2) |
| C(11) | 51(1) | 218(4) | 70(2)  | -32(2) | 14(1)  | -32(2) |
| C(12) | 37(1) | 82(2)  | 94(2)  | -4(1)  | 3(1)   | -8(1)  |
| C(13) | 39(1) | 92(2)  | 90(2)  | 1(1)   | -20(1) | -11(1) |
| C(14) | 29(1) | 39(1)  | 26(1)  | 2(1)   | 6(1)   | -4(1)  |
| C(15) | 36(1) | 42(1)  | 33(1)  | 2(1)   | 4(1)   | -2(1)  |
| C(16) | 56(1) | 39(1)  | 56(1)  | -2(1)  | -6(1)  | -2(1)  |
| C(17) | 43(1) | 49(1)  | 42(1)  | 6(1)   | 1(1)   | 7(1)   |
| C(18) | 35(1) | 66(1)  | 34(1)  | 3(1)   | -1(1)  | 2(1)   |
| C(19) | 50(1) | 103(2) | 62(1)  | -2(1)  | -19(1) | 12(1)  |
| C(20) | 35(1) | 58(1)  | 34(1)  | -5(1)  | 2(1)   | -12(1) |
| C(21) | 36(1) | 43(1)  | 28(1)  | 1(1)   | 6(1)   | -7(1)  |
| C(22) | 55(1) | 42(1)  | 59(1)  | -6(1)  | -6(1)  | -7(1)  |
| C(23) | 30(1) | 46(1)  | 34(1)  | -9(1)  | 1(1)   | -3(1)  |
| C(24) | 32(1) | 62(1)  | 33(1)  | -15(1) | 6(1)   | -11(1) |
| C(25) | 50(1) | 66(1)  | 40(1)  | 0(1)   | 13(1)  | -16(1) |
| C(26) | 39(1) | 79(2)  | 51(1)  | -20(1) | 14(1)  | -11(1) |
| C(27) | 36(1) | 85(2)  | 74(1)  | -31(1) | 12(1)  | 1(1)   |
| C(28) | 52(1) | 131(3) | 131(3) | -34(2) | 28(2)  | 23(2)  |
| C(29) | 45(1) | 58(1)  | 79(1)  | -19(1) | -6(1)  | 13(1)  |
| C(30) | 35(1) | 50(1)  | 49(1)  | -10(1) | -2(1)  | 1(1)   |
| C(31) | 58(1) | 50(1)  | 70(1)  | 11(1)  | -1(1)  | 7(1)   |

**Table S86.** Hydrogen coordinates ( $\times 10^4$ ) and isotropic displacement parameters ( $\text{\AA}^2 \times 10^3$ ) for **5a**.

|        | x     | y     | z     | U(eq) |
|--------|-------|-------|-------|-------|
| H(2A)  | 4396  | 7084  | 10016 | 44    |
| H(3A)  | 4058  | 7158  | 11256 | 52    |
| H(4A)  | 5493  | 7688  | 12085 | 57    |
| H(5A)  | 7247  | 8152  | 11673 | 52    |
| H(7A)  | 8126  | 8216  | 9845  | 49    |
| H(8A)  | 8936  | 8014  | 11262 | 66    |
| H(10A) | 9798  | 8211  | 9408  | 123   |
| H(11A) | 11625 | 8592  | 9061  | 135   |
| H(12A) | 13016 | 8918  | 9960  | 85    |
| H(13A) | 12530 | 8917  | 11151 | 89    |
| H(16A) | 4799  | 10048 | 9253  | 76    |
| H(16B) | 5674  | 10037 | 8618  | 76    |
| H(16C) | 5917  | 9324  | 9341  | 76    |
| H(17A) | 3500  | 9557  | 8178  | 53    |
| H(19A) | 1562  | 8660  | 7749  | 108   |
| H(19B) | 1690  | 7526  | 7302  | 108   |
| H(19C) | 2236  | 8653  | 7015  | 108   |
| H(20A) | 3132  | 6282  | 7731  | 51    |
| H(22A) | 4427  | 4959  | 8084  | 79    |
| H(22B) | 4856  | 5157  | 8908  | 79    |
| H(22C) | 5684  | 5356  | 8258  | 79    |
| H(25A) | 7980  | 8438  | 7615  | 78    |
| H(25B) | 7803  | 8912  | 8415  | 78    |
| H(25C) | 6788  | 8326  | 7972  | 78    |

|        |       |      |       |     |
|--------|-------|------|-------|-----|
| H(26A) | 9321  | 7063 | 7779  | 67  |
| H(28A) | 10503 | 5356 | 7672  | 156 |
| H(28B) | 10431 | 4405 | 8278  | 156 |
| H(28C) | 11086 | 5538 | 8460  | 156 |
| H(29A) | 9071  | 4572 | 9236  | 73  |
| H(31D) | 7513  | 4319 | 9926  | 89  |
| H(31A) | 6419  | 5068 | 9796  | 89  |
| H(31B) | 7393  | 5471 | 10354 | 89  |

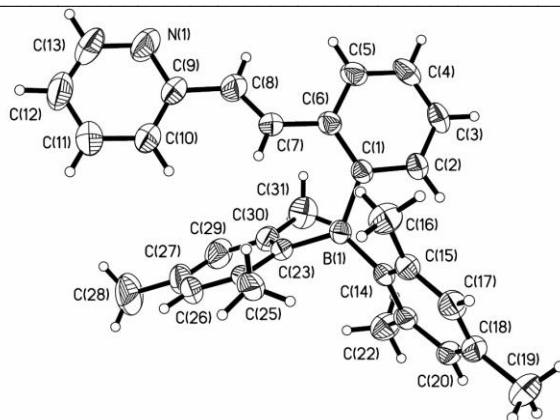

**Figure S154.** Crystal structure of **5a**

**Table S87.** Crystal data and structure refinement for **6a**.

|                                   |                                                                              |                 |
|-----------------------------------|------------------------------------------------------------------------------|-----------------|
| Identification code               | <b>6a</b>                                                                    |                 |
| Empirical formula                 | C <sub>32</sub> H <sub>36</sub> B <sub>1</sub> N <sub>1</sub> S <sub>1</sub> |                 |
| Formula weight                    | 477.49                                                                       |                 |
| Temperature                       | 220(2) K                                                                     |                 |
| Wavelength                        | 0.71073 Å                                                                    |                 |
| Crystal system                    | Monoclinic                                                                   |                 |
| Space group                       | P2 <sub>1</sub> /c                                                           |                 |
| Unit cell dimensions              | a = 7.9250(4) Å                                                              | α = 90°.        |
|                                   | b = 21.8524(8) Å                                                             | β = 98.766(2)°. |
|                                   | c = 16.0075(6) Å                                                             | γ = 90°.        |
| Volume                            | 2739.8(2) Å <sup>3</sup>                                                     |                 |
| Z                                 | 4                                                                            |                 |
| Density (calculated)              | 1.158 Mg/m <sup>3</sup>                                                      |                 |
| Absorption coefficient            | 0.139 mm <sup>-1</sup>                                                       |                 |
| F(000)                            | 1024                                                                         |                 |
| Crystal size                      | 0.200 x 0.180 x 0.060 mm <sup>3</sup>                                        |                 |
| Theta range for data collection   | 2.265 to 27.130°.                                                            |                 |
| Index ranges                      | -10 ≤ h ≤ 10, -28 ≤ k ≤ 27, -20 ≤ l ≤ 20                                     |                 |
| Reflections collected             | 60597                                                                        |                 |
| Independent reflections           | 6043 [R(int) = 0.0960]                                                       |                 |
| Completeness to theta = 25.242°   | 99.8 %                                                                       |                 |
| Absorption correction             | Semi-empirical from equivalents                                              |                 |
| Max. and min. transmission        | 0.992 and 0.973                                                              |                 |
| Refinement method                 | Full-matrix least-squares on F <sup>2</sup>                                  |                 |
| Data / restraints / parameters    | 6043 / 0 / 324                                                               |                 |
| Goodness-of-fit on F <sup>2</sup> | 1.150                                                                        |                 |
| Final R indices [I > 2σ(I)]       | R1 = 0.0861, wR2 = 0.2213                                                    |                 |
| R indices (all data)              | R1 = 0.1264, wR2 = 0.2442                                                    |                 |

Extinction coefficient n/a  
 Largest diff. peak and hole 0.854 and -1.096 e.Å<sup>-3</sup>

**Table S88.** Atomic coordinates ( $\times 10^4$ ) and equivalent isotropic displacement parameters ( $\text{Å}^2 \times 10^3$ ) for **6a**.  $U(\text{eq})$  is defined as one third of the trace of the orthogonalized  $U^{\text{ij}}$  tensor.

|       | x        | y       | z       | $U(\text{eq})$ |
|-------|----------|---------|---------|----------------|
| B(1)  | 4588(4)  | 7327(2) | 5382(2) | 29(1)          |
| S(1)  | 6085(2)  | 5562(1) | 7585(1) | 79(1)          |
| N(1)  | -57(4)   | 5744(1) | 3224(2) | 43(1)          |
| C(1)  | 3375(4)  | 6864(1) | 4854(2) | 30(1)          |
| C(2)  | 3097(4)  | 6240(1) | 5051(2) | 28(1)          |
| C(3)  | 1962(4)  | 5879(1) | 4507(2) | 33(1)          |
| C(4)  | 1091(4)  | 6104(1) | 3736(2) | 32(1)          |
| C(5)  | 1400(4)  | 6714(1) | 3529(2) | 37(1)          |
| C(6)  | 2473(4)  | 7069(1) | 4078(2) | 36(1)          |
| C(7)  | 3955(4)  | 5968(1) | 5844(2) | 32(1)          |
| C(8)  | 4257(4)  | 5378(1) | 5996(2) | 34(1)          |
| C(9)  | 5125(4)  | 5122(1) | 6784(2) | 33(1)          |
| C(10) | 5214(4)  | 4453(1) | 7015(2) | 32(1)          |
| C(11) | 6254(5)  | 4423(2) | 7832(3) | 57(1)          |
| C(12) | 6749(6)  | 4960(2) | 8187(2) | 62(1)          |
| C(13) | -159(6)  | 5097(2) | 3379(3) | 57(1)          |
| C(14) | -919(5)  | 5975(2) | 2425(3) | 59(1)          |
| C(15) | 6277(4)  | 7129(1) | 5981(2) | 30(1)          |
| C(16) | 6629(4)  | 7322(1) | 6837(2) | 34(1)          |
| C(17) | 5391(5)  | 7716(2) | 7227(2) | 56(1)          |
| C(18) | 8102(4)  | 7125(1) | 7352(2) | 38(1)          |
| C(19) | 9287(4)  | 6744(1) | 7060(2) | 39(1)          |
| C(20) | 10881(5) | 6537(2) | 7630(3) | 62(1)          |
| C(21) | 8955(4)  | 6567(1) | 6218(2) | 35(1)          |
| C(22) | 7503(4)  | 6744(1) | 5682(2) | 31(1)          |
| C(23) | 7316(5)  | 6526(2) | 4780(2) | 49(1)          |
| C(24) | 4038(4)  | 8027(1) | 5238(2) | 30(1)          |
| C(25) | 2413(4)  | 8226(1) | 5378(2) | 33(1)          |
| C(26) | 1251(5)  | 7819(2) | 5811(3) | 50(1)          |
| C(27) | 1821(4)  | 8808(1) | 5123(2) | 38(1)          |
| C(28) | 2786(5)  | 9203(1) | 4717(2) | 40(1)          |
| C(29) | 2085(6)  | 9814(2) | 4375(3) | 62(1)          |
| C(30) | 4393(5)  | 9014(2) | 4603(2) | 43(1)          |
| C(31) | 5048(4)  | 8439(2) | 4858(2) | 38(1)          |
| C(32) | 6805(5)  | 8275(2) | 4685(3) | 70(1)          |

**Table S89.** Bond lengths [ $\text{Å}$ ] and angles [ $^\circ$ ] for **6a**.

|            |          |           |          |
|------------|----------|-----------|----------|
| B(1)-C(1)  | 1.554(4) | C(1)-C(6) | 1.409(4) |
| B(1)-C(15) | 1.583(4) | C(1)-C(2) | 1.423(4) |
| B(1)-C(24) | 1.598(4) | C(2)-C(3) | 1.397(4) |
| S(1)-C(12) | 1.668(4) | C(2)-C(7) | 1.471(4) |
| S(1)-C(9)  | 1.689(3) | C(3)-C(4) | 1.408(4) |
| N(1)-C(4)  | 1.375(4) | C(3)-H(3) | 0.9400   |
| N(1)-C(13) | 1.439(5) | C(4)-C(5) | 1.404(4) |
| N(1)-C(14) | 1.446(5) | C(5)-C(6) | 1.368(4) |

|              |          |                     |           |
|--------------|----------|---------------------|-----------|
| C(5)-H(5)    | 0.9400   | C(32)-H(32B)        | 0.9700    |
| C(6)-H(6)    | 0.9400   | C(32)-H(32C)        | 0.9700    |
| C(7)-C(8)    | 1.327(4) | C(1)-B(1)-C(15)     | 123.2(3)  |
| C(7)-H(7)    | 0.9400   | C(1)-B(1)-C(24)     | 114.4(3)  |
| C(8)-C(9)    | 1.454(4) | C(15)-B(1)-C(24)    | 122.4(3)  |
| C(8)-H(8)    | 0.9400   | C(12)-S(1)-C(9)     | 93.17(19) |
| C(9)-C(10)   | 1.507(4) | C(4)-N(1)-C(13)     | 120.6(3)  |
| C(10)-C(11)  | 1.437(5) | C(4)-N(1)-C(14)     | 120.5(3)  |
| C(10)-H(10A) | 0.9400   | C(13)-N(1)-C(14)    | 117.6(3)  |
| C(11)-C(12)  | 1.337(6) | C(6)-C(1)-C(2)      | 115.2(3)  |
| C(11)-H(11)  | 0.9400   | C(6)-C(1)-B(1)      | 117.4(3)  |
| C(12)-H(12)  | 0.9400   | C(2)-C(1)-B(1)      | 127.4(3)  |
| C(13)-H(13A) | 0.9700   | C(3)-C(2)-C(1)      | 120.7(3)  |
| C(13)-H(13B) | 0.9700   | C(3)-C(2)-C(7)      | 118.6(3)  |
| C(13)-H(13C) | 0.9700   | C(1)-C(2)-C(7)      | 120.8(3)  |
| C(14)-H(14A) | 0.9700   | C(2)-C(3)-C(4)      | 122.2(3)  |
| C(14)-H(14B) | 0.9700   | C(2)-C(3)-H(3)      | 118.9     |
| C(14)-H(14C) | 0.9700   | C(4)-C(3)-H(3)      | 118.9     |
| C(15)-C(16)  | 1.420(4) | N(1)-C(4)-C(5)      | 121.8(3)  |
| C(15)-C(22)  | 1.421(4) | N(1)-C(4)-C(3)      | 120.9(3)  |
| C(16)-C(18)  | 1.391(5) | C(5)-C(4)-C(3)      | 117.3(3)  |
| C(16)-C(17)  | 1.509(5) | C(6)-C(5)-C(4)      | 120.1(3)  |
| C(17)-H(17A) | 0.9700   | C(6)-C(5)-H(5)      | 120.0     |
| C(17)-H(17B) | 0.9700   | C(4)-C(5)-H(5)      | 120.0     |
| C(17)-H(17C) | 0.9700   | C(5)-C(6)-C(1)      | 124.6(3)  |
| C(18)-C(19)  | 1.388(5) | C(5)-C(6)-H(6)      | 117.7     |
| C(18)-H(18)  | 0.9400   | C(1)-C(6)-H(6)      | 117.7     |
| C(19)-C(21)  | 1.389(5) | C(8)-C(7)-C(2)      | 126.8(3)  |
| C(19)-C(20)  | 1.510(5) | C(8)-C(7)-H(7)      | 116.6     |
| C(20)-H(20A) | 0.9700   | C(2)-C(7)-H(7)      | 116.6     |
| C(20)-H(20B) | 0.9700   | C(7)-C(8)-C(9)      | 125.6(3)  |
| C(20)-H(20C) | 0.9700   | C(7)-C(8)-H(8)      | 117.2     |
| C(21)-C(22)  | 1.382(4) | C(9)-C(8)-H(8)      | 117.2     |
| C(21)-H(21)  | 0.9400   | C(8)-C(9)-C(10)     | 125.8(3)  |
| C(22)-C(23)  | 1.507(4) | C(8)-C(9)-S(1)      | 122.6(2)  |
| C(23)-H(23A) | 0.9700   | C(10)-C(9)-S(1)     | 111.6(2)  |
| C(23)-H(23B) | 0.9700   | C(11)-C(10)-C(9)    | 105.5(3)  |
| C(23)-H(23C) | 0.9700   | C(11)-C(10)-H(10A)  | 127.3     |
| C(24)-C(31)  | 1.402(4) | C(9)-C(10)-H(10A)   | 127.3     |
| C(24)-C(25)  | 1.410(4) | C(12)-C(11)-C(10)   | 116.0(3)  |
| C(25)-C(27)  | 1.394(4) | C(12)-C(11)-H(11)   | 122.0     |
| C(25)-C(26)  | 1.521(5) | C(10)-C(11)-H(11)   | 122.0     |
| C(26)-H(26A) | 0.9700   | C(11)-C(12)-S(1)    | 113.6(3)  |
| C(26)-H(26B) | 0.9700   | C(11)-C(12)-H(12)   | 123.2     |
| C(26)-H(26C) | 0.9700   | S(1)-C(12)-H(12)    | 123.2     |
| C(27)-C(28)  | 1.379(5) | N(1)-C(13)-H(13A)   | 109.5     |
| C(27)-H(27)  | 0.9400   | N(1)-C(13)-H(13B)   | 109.5     |
| C(28)-C(30)  | 1.377(5) | H(13A)-C(13)-H(13B) | 109.5     |
| C(28)-C(29)  | 1.517(5) | N(1)-C(13)-H(13C)   | 109.5     |
| C(29)-H(29A) | 0.9700   | H(13A)-C(13)-H(13C) | 109.5     |
| C(29)-H(29B) | 0.9700   | H(13B)-C(13)-H(13C) | 109.5     |
| C(29)-H(29C) | 0.9700   | N(1)-C(14)-H(14A)   | 109.5     |
| C(30)-C(31)  | 1.397(5) | N(1)-C(14)-H(14B)   | 109.5     |
| C(30)-H(30)  | 0.9400   | H(14A)-C(14)-H(14B) | 109.5     |
| C(31)-C(32)  | 1.504(5) | N(1)-C(14)-H(14C)   | 109.5     |
| C(32)-H(32A) | 0.9700   | H(14A)-C(14)-H(14C) | 109.5     |

|                     |          |                     |          |
|---------------------|----------|---------------------|----------|
| H(14B)-C(14)-H(14C) | 109.5    | C(31)-C(24)-C(25)   | 117.8(3) |
| C(16)-C(15)-C(22)   | 117.2(3) | C(31)-C(24)-B(1)    | 121.1(3) |
| C(16)-C(15)-B(1)    | 121.8(3) | C(25)-C(24)-B(1)    | 120.5(3) |
| C(22)-C(15)-B(1)    | 121.0(3) | C(27)-C(25)-C(24)   | 120.6(3) |
| C(18)-C(16)-C(15)   | 120.3(3) | C(27)-C(25)-C(26)   | 117.8(3) |
| C(18)-C(16)-C(17)   | 118.1(3) | C(24)-C(25)-C(26)   | 121.6(3) |
| C(15)-C(16)-C(17)   | 121.6(3) | C(25)-C(26)-H(26A)  | 109.5    |
| C(16)-C(17)-H(17A)  | 109.5    | C(25)-C(26)-H(26B)  | 109.5    |
| C(16)-C(17)-H(17B)  | 109.5    | H(26A)-C(26)-H(26B) | 109.5    |
| H(17A)-C(17)-H(17B) | 109.5    | C(25)-C(26)-H(26C)  | 109.5    |
| C(16)-C(17)-H(17C)  | 109.5    | H(26A)-C(26)-H(26C) | 109.5    |
| H(17A)-C(17)-H(17C) | 109.5    | H(26B)-C(26)-H(26C) | 109.5    |
| H(17B)-C(17)-H(17C) | 109.5    | C(28)-C(27)-C(25)   | 121.5(3) |
| C(19)-C(18)-C(16)   | 122.4(3) | C(28)-C(27)-H(27)   | 119.2    |
| C(19)-C(18)-H(18)   | 118.8    | C(25)-C(27)-H(27)   | 119.2    |
| C(16)-C(18)-H(18)   | 118.8    | C(30)-C(28)-C(27)   | 117.7(3) |
| C(18)-C(19)-C(21)   | 117.2(3) | C(30)-C(28)-C(29)   | 120.8(3) |
| C(18)-C(19)-C(20)   | 121.5(3) | C(27)-C(28)-C(29)   | 121.5(3) |
| C(21)-C(19)-C(20)   | 121.3(3) | C(28)-C(29)-H(29A)  | 109.5    |
| C(19)-C(20)-H(20A)  | 109.5    | C(28)-C(29)-H(29B)  | 109.5    |
| C(19)-C(20)-H(20B)  | 109.5    | H(29A)-C(29)-H(29B) | 109.5    |
| H(20A)-C(20)-H(20B) | 109.5    | C(28)-C(29)-H(29C)  | 109.5    |
| C(19)-C(20)-H(20C)  | 109.5    | H(29A)-C(29)-H(29C) | 109.5    |
| H(20A)-C(20)-H(20C) | 109.5    | H(29B)-C(29)-H(29C) | 109.5    |
| H(20B)-C(20)-H(20C) | 109.5    | C(28)-C(30)-C(31)   | 122.7(3) |
| C(22)-C(21)-C(19)   | 122.7(3) | C(28)-C(30)-H(30)   | 118.6    |
| C(22)-C(21)-H(21)   | 118.6    | C(31)-C(30)-H(30)   | 118.6    |
| C(19)-C(21)-H(21)   | 118.6    | C(30)-C(31)-C(24)   | 119.5(3) |
| C(21)-C(22)-C(15)   | 120.3(3) | C(30)-C(31)-C(32)   | 118.3(3) |
| C(21)-C(22)-C(23)   | 117.2(3) | C(24)-C(31)-C(32)   | 122.2(3) |
| C(15)-C(22)-C(23)   | 122.5(3) | C(31)-C(32)-H(32A)  | 109.5    |
| C(22)-C(23)-H(23A)  | 109.5    | C(31)-C(32)-H(32B)  | 109.5    |
| C(22)-C(23)-H(23B)  | 109.5    | H(32A)-C(32)-H(32B) | 109.5    |
| H(23A)-C(23)-H(23B) | 109.5    | C(31)-C(32)-H(32C)  | 109.5    |
| C(22)-C(23)-H(23C)  | 109.5    | H(32A)-C(32)-H(32C) | 109.5    |
| H(23A)-C(23)-H(23C) | 109.5    | H(32B)-C(32)-H(32C) | 109.5    |
| H(23B)-C(23)-H(23C) | 109.5    |                     |          |

**Table S90.** Anisotropic displacement parameters ( $\text{\AA}^2 \times 10^3$ ) for **6a**. The anisotropic displacement factor exponent takes the form:  $-2\pi^2 [h^2 a^{*2} U^{11} + \dots + 2 h k a^* b^* U^{12}]$

|      | U <sup>11</sup> | U <sup>22</sup> | U <sup>33</sup> | U <sup>23</sup> | U <sup>13</sup> | U <sup>12</sup> |
|------|-----------------|-----------------|-----------------|-----------------|-----------------|-----------------|
| B(1) | 32(2)           | 30(2)           | 26(2)           | 2(1)            | 6(1)            | -1(1)           |
| S(1) | 125(1)          | 51(1)           | 52(1)           | 1(1)            | -14(1)          | 7(1)            |
| N(1) | 46(2)           | 39(2)           | 41(2)           | -9(1)           | -5(1)           | -6(1)           |
| C(1) | 32(2)           | 29(2)           | 28(1)           | 0(1)            | 0(1)            | 1(1)            |
| C(2) | 29(2)           | 27(1)           | 29(1)           | -2(1)           | 6(1)            | 0(1)            |
| C(3) | 37(2)           | 26(2)           | 36(2)           | -1(1)           | 8(1)            | -1(1)           |
| C(4) | 30(2)           | 34(2)           | 31(2)           | -7(1)           | 2(1)            | 1(1)            |
| C(5) | 41(2)           | 34(2)           | 31(2)           | 0(1)            | -7(1)           | 6(1)            |
| C(6) | 41(2)           | 29(2)           | 37(2)           | 4(1)            | -3(1)           | 1(1)            |
| C(7) | 34(2)           | 30(2)           | 30(2)           | 0(1)            | 3(1)            | -4(1)           |
| C(8) | 38(2)           | 31(2)           | 34(2)           | 2(1)            | 4(1)            | 1(1)            |

|       |       |       |        |        |        |        |
|-------|-------|-------|--------|--------|--------|--------|
| C(9)  | 37(2) | 30(2) | 34(2)  | 4(1)   | 6(1)   | 2(1)   |
| C(10) | 43(2) | 21(1) | 26(1)  | -1(1)  | -15(1) | 19(1)  |
| C(11) | 59(2) | 42(2) | 68(3)  | 20(2)  | 3(2)   | 10(2)  |
| C(12) | 76(3) | 69(3) | 35(2)  | 1(2)   | -8(2)  | 21(2)  |
| C(13) | 62(3) | 43(2) | 61(2)  | -10(2) | -2(2)  | -17(2) |
| C(14) | 60(3) | 57(2) | 52(2)  | -11(2) | -20(2) | -4(2)  |
| C(15) | 32(2) | 28(1) | 30(2)  | -1(1)  | 3(1)   | -4(1)  |
| C(16) | 40(2) | 30(2) | 31(2)  | -4(1)  | 2(1)   | -5(1)  |
| C(17) | 57(2) | 70(3) | 40(2)  | -20(2) | 3(2)   | 7(2)   |
| C(18) | 47(2) | 36(2) | 28(2)  | 0(1)   | -6(1)  | -9(1)  |
| C(19) | 40(2) | 31(2) | 43(2)  | 6(1)   | -9(1)  | -5(1)  |
| C(20) | 60(3) | 50(2) | 64(3)  | 2(2)   | -26(2) | 6(2)   |
| C(21) | 30(2) | 28(2) | 46(2)  | 0(1)   | 1(1)   | -1(1)  |
| C(22) | 33(2) | 29(2) | 32(2)  | 0(1)   | 3(1)   | -4(1)  |
| C(23) | 40(2) | 64(2) | 42(2)  | -15(2) | 5(2)   | 9(2)   |
| C(24) | 32(2) | 27(1) | 28(1)  | -1(1)  | -3(1)  | -5(1)  |
| C(25) | 34(2) | 28(2) | 36(2)  | -1(1)  | -1(1)  | -3(1)  |
| C(26) | 41(2) | 42(2) | 71(3)  | 8(2)   | 18(2)  | 0(2)   |
| C(27) | 38(2) | 34(2) | 38(2)  | -6(1)  | -5(1)  | 5(1)   |
| C(28) | 56(2) | 27(2) | 32(2)  | 0(1)   | -9(2)  | -2(1)  |
| C(29) | 87(3) | 33(2) | 59(2)  | 9(2)   | -8(2)  | 7(2)   |
| C(30) | 52(2) | 34(2) | 42(2)  | 7(1)   | 2(2)   | -12(2) |
| C(31) | 37(2) | 36(2) | 40(2)  | 5(1)   | 0(1)   | -7(1)  |
| C(32) | 51(2) | 66(3) | 101(4) | 28(3)  | 31(2)  | -2(2)  |

**Table S91.** Hydrogen coordinates ( $\times 10^4$ ) and isotropic displacement parameters ( $\text{\AA}^2 \times 10^3$ ) for 6a.

|        | x     | y    | z    | U(eq) |
|--------|-------|------|------|-------|
| H(3)   | 1773  | 5472 | 4661 | 40    |
| H(5)   | 870   | 6878 | 3012 | 44    |
| H(6)   | 2618  | 7480 | 3928 | 44    |
| H(7)   | 4327  | 6240 | 6288 | 38    |
| H(8)   | 3878  | 5102 | 5556 | 41    |
| H(10A) | 4697  | 4125 | 6692 | 38    |
| H(11)  | 6567  | 4048 | 8099 | 69    |
| H(12)  | 7408  | 4994 | 8726 | 74    |
| H(13A) | -995  | 4913 | 2946 | 85    |
| H(13B) | -499  | 5031 | 3929 | 85    |
| H(13C) | 948   | 4911 | 3367 | 85    |
| H(14A) | -97   | 6031 | 2040 | 89    |
| H(14B) | -1455 | 6363 | 2514 | 89    |
| H(14C) | -1784 | 5684 | 2184 | 89    |
| H(17A) | 5092  | 8072 | 6873 | 84    |
| H(17B) | 5918  | 7847 | 7785 | 84    |
| H(17C) | 4369  | 7482 | 7272 | 84    |
| H(18)  | 8302  | 7255 | 7919 | 45    |
| H(20A) | 11349 | 6181 | 7385 | 93    |
| H(20B) | 10601 | 6433 | 8181 | 93    |
| H(20C) | 11718 | 6865 | 7688 | 93    |
| H(21)  | 9751  | 6315 | 6004 | 42    |
| H(23A) | 6538  | 6794 | 4423 | 73    |
| H(23B) | 6868  | 6112 | 4744 | 73    |

|        |      |       |      |     |
|--------|------|-------|------|-----|
| H(23C) | 8423 | 6532  | 4591 | 73  |
| H(26A) | 436  | 7616  | 5388 | 76  |
| H(26B) | 645  | 8067  | 6171 | 76  |
| H(26C) | 1933 | 7515  | 6152 | 76  |
| H(27)  | 741  | 8934  | 5230 | 46  |
| H(29A) | 3023 | 10094 | 4344 | 93  |
| H(29B) | 1346 | 9982  | 4749 | 93  |
| H(29C) | 1438 | 9758  | 3816 | 93  |
| H(30)  | 5077 | 9283  | 4342 | 52  |
| H(32A) | 6741 | 7909  | 4339 | 105 |
| H(32B) | 7546 | 8200  | 5216 | 105 |
| H(32C) | 7259 | 8609  | 4389 | 105 |

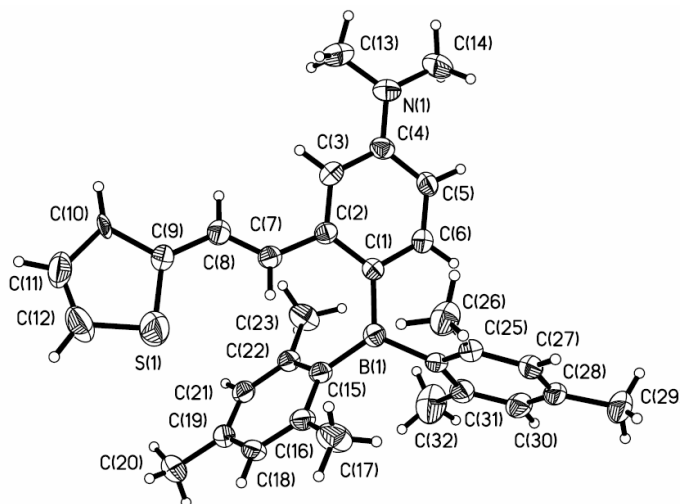

**Figure S155.** Structure of **6a**.

**Table S92.** Crystal data and structure refinement for **7a**.

|                                 |                                                          |                                         |
|---------------------------------|----------------------------------------------------------|-----------------------------------------|
| Identification code             | <b>7a</b>                                                |                                         |
| Empirical formula               | C <sub>32</sub> H <sub>36</sub> B N S                    |                                         |
| Formula weight                  | 477.49                                                   |                                         |
| Temperature                     | 220(2) K                                                 |                                         |
| Wavelength                      | 0.71073 Å                                                |                                         |
| Crystal system                  | Monoclinic                                               |                                         |
| Space group                     | P2 <sub>1</sub> /c                                       |                                         |
| Unit cell dimensions            | a = 7.9779(4) Å<br>b = 21.8456(11) Å<br>c = 15.7662(8) Å | α = 90°.<br>β = 98.411(2)°.<br>γ = 90°. |
| Volume                          | 2718.2(2) Å <sup>3</sup>                                 |                                         |
| Z                               | 4                                                        |                                         |
| Density (calculated)            | 1.167 Mg/m <sup>3</sup>                                  |                                         |
| Absorption coefficient          | 0.140 mm <sup>-1</sup>                                   |                                         |
| F(000)                          | 1024                                                     |                                         |
| Crystal size                    | 0.300 x 0.220 x 0.100 mm <sup>3</sup>                    |                                         |
| Theta range for data collection | 2.581 to 27.168°.                                        |                                         |
| Index ranges                    | -10 ≤ h ≤ 9, -28 ≤ k ≤ 28, -19 ≤ l ≤ 20                  |                                         |
| Reflections collected           | 27885                                                    |                                         |
| Independent reflections         | 6016 [R(int) = 0.1047]                                   |                                         |
| Completeness to theta = 25.242° | 99.9 %                                                   |                                         |

|                                   |                                             |
|-----------------------------------|---------------------------------------------|
| Absorption correction             | Semi-empirical from equivalents             |
| Max. and min. transmission        | 0.968 and 0.959                             |
| Refinement method                 | Full-matrix least-squares on F <sup>2</sup> |
| Data / restraints / parameters    | 6016 / 0 / 348                              |
| Goodness-of-fit on F <sup>2</sup> | 1.019                                       |
| Final R indices [I>2sigma(I)]     | R1 = 0.0642, wR2 = 0.1418                   |
| R indices (all data)              | R1 = 0.1222, wR2 = 0.1665                   |
| Extinction coefficient            | n/a                                         |
| Largest diff. peak and hole       | 0.228 and -0.277 e.Å <sup>-3</sup>          |

**Table S93.** Atomic coordinates ( $\times 10^4$ ) and equivalent isotropic displacement parameters ( $\text{\AA}^2 \times 10^3$ ) for **7a**.  $U(\text{eq})$  is defined as one third of the trace of the orthogonalized  $U_{ij}$  tensor.

|        | x        | y        | z        | U(eq)  |
|--------|----------|----------|----------|--------|
| S(1)   | 2841(6)  | 5037(2)  | 1722(3)  | 43(1)  |
| S(1A)  | 3667(3)  | 4340(1)  | 2096(1)  | 53(1)  |
| C(1)   | 6644(3)  | 6869(1)  | 5120(1)  | 30(1)  |
| N(1)   | 10068(3) | 5747(1)  | 6749(1)  | 44(1)  |
| B(1)   | 5447(3)  | 7334(1)  | 4591(2)  | 31(1)  |
| C(2)   | 6904(3)  | 6243(1)  | 4920(1)  | 29(1)  |
| C(6)   | 7560(3)  | 7074(1)  | 5901(2)  | 36(1)  |
| C(5)   | 8629(3)  | 6716(1)  | 6449(2)  | 37(1)  |
| C(4)   | 8924(3)  | 6106(1)  | 6235(1)  | 33(1)  |
| C(3)   | 8033(3)  | 5886(1)  | 5464(2)  | 32(1)  |
| C(7)   | 6034(3)  | 5973(1)  | 4121(2)  | 32(1)  |
| C(9)   | 4779(3)  | 5131(1)  | 3184(1)  | 33(1)  |
| C(8)   | 5680(3)  | 5385(1)  | 3979(2)  | 36(1)  |
| C(10)  | 3815(4)  | 5463(1)  | 2533(2)  | 49(1)  |
| C(11)  | 4726(4)  | 4511(1)  | 2978(2)  | 52(1)  |
| C(12)  | 3670(30) | 4381(12) | 2083(14) | 214(9) |
| C(12A) | 3200(20) | 5071(10) | 1843(13) | 64(6)  |
| C(13)  | 10195(4) | 5102(1)  | 6582(2)  | 54(1)  |
| C(14)  | 10954(3) | 5982(1)  | 7547(2)  | 55(1)  |
| C(15)  | 5987(3)  | 8030(1)  | 4740(1)  | 31(1)  |
| C(16)  | 4973(3)  | 8446(1)  | 5119(2)  | 38(1)  |
| C(17)  | 3204(4)  | 8283(1)  | 5277(2)  | 69(1)  |
| C(18)  | 5614(3)  | 9018(1)  | 5386(2)  | 43(1)  |
| C(19)  | 7214(3)  | 9208(1)  | 5280(2)  | 38(1)  |
| C(20)  | 7896(4)  | 9820(1)  | 5625(2)  | 58(1)  |
| C(21)  | 8177(3)  | 8810(1)  | 4869(2)  | 38(1)  |
| C(22)  | 8752(3)  | 7831(1)  | 4164(2)  | 50(1)  |
| C(23)  | 7602(3)  | 8231(1)  | 4604(1)  | 33(1)  |
| C(24)  | 3759(3)  | 7133(1)  | 3994(1)  | 30(1)  |
| C(25)  | 2543(3)  | 6754(1)  | 4307(1)  | 33(1)  |
| C(26)  | 2728(3)  | 6539(1)  | 5226(2)  | 49(1)  |
| C(27)  | 1093(3)  | 6571(1)  | 3770(2)  | 36(1)  |
| C(28)  | 768(3)   | 6744(1)  | 2920(2)  | 39(1)  |
| C(29)  | -807(4)  | 6535(1)  | 2350(2)  | 64(1)  |
| C(30)  | 1945(3)  | 7120(1)  | 2612(2)  | 40(1)  |
| C(31)  | 3413(3)  | 7316(1)  | 3129(2)  | 34(1)  |
| C(32)  | 4638(3)  | 7707(1)  | 2724(2)  | 54(1)  |



**Table S94.** Bond lengths [Å] and angles [°] for **7a**.

|               |           |                    |            |
|---------------|-----------|--------------------|------------|
| S(1)-C(12)    | 1.64(3)   | C(23)-C(22)        | 1.508(3)   |
| S(1)-C(10)    | 1.676(5)  | C(24)-C(31)        | 1.410(3)   |
| S(1A)-C(11)   | 1.564(4)  | C(24)-C(25)        | 1.418(3)   |
| S(1A)-C(12A)  | 1.67(2)   | C(25)-C(27)        | 1.388(3)   |
| C(1)-C(6)     | 1.409(3)  | C(25)-C(26)        | 1.509(3)   |
| C(1)-C(2)     | 1.426(3)  | C(26)-H(26A)       | 0.9700     |
| C(1)-B(1)     | 1.552(3)  | C(26)-H(26B)       | 0.9700     |
| N(1)-C(4)     | 1.373(3)  | C(26)-H(26C)       | 0.9700     |
| N(1)-C(13)    | 1.440(3)  | C(27)-C(28)        | 1.380(3)   |
| N(1)-C(14)    | 1.443(3)  | C(27)-H(27A)       | 0.9400     |
| B(1)-C(24)    | 1.587(3)  | C(28)-C(30)        | 1.388(3)   |
| B(1)-C(15)    | 1.589(3)  | C(28)-C(29)        | 1.506(3)   |
| C(2)-C(3)     | 1.389(3)  | C(29)-H(29A)       | 0.9700     |
| C(2)-C(7)     | 1.470(3)  | C(29)-H(29B)       | 0.9700     |
| C(6)-C(5)     | 1.369(3)  | C(29)-H(29C)       | 0.9700     |
| C(6)-H(6A)    | 0.9400    | C(30)-C(31)        | 1.393(3)   |
| C(5)-C(4)     | 1.403(3)  | C(30)-H(30A)       | 0.9400     |
| C(5)-H(5A)    | 0.9400    | C(31)-C(32)        | 1.508(3)   |
| C(4)-C(3)     | 1.400(3)  | C(32)-H(32A)       | 0.9700     |
| C(3)-H(3A)    | 0.9400    | C(32)-H(32B)       | 0.9700     |
| C(7)-C(8)     | 1.328(3)  | C(32)-H(32C)       | 0.9700     |
| C(7)-H(7A)    | 0.9400    | C(22)-H(22A)       | 0.9700     |
| C(9)-C(11)    | 1.392(3)  | C(22)-H(22B)       | 0.9700     |
| C(9)-C(10)    | 1.393(3)  | C(22)-H(22C)       | 0.9700     |
| C(9)-C(8)     | 1.459(3)  | C(12)-S(1)-C(10)   | 95.9(8)    |
| C(8)-H(8A)    | 0.9400    | C(11)-S(1A)-C(12A) | 93.2(6)    |
| C(10)-C(12A)  | 1.413(18) | C(6)-C(1)-C(2)     | 115.15(19) |
| C(10)-H(10A)  | 0.92(3)   | C(6)-C(1)-B(1)     | 117.5(2)   |
| C(11)-C(12)   | 1.56(2)   | C(2)-C(1)-B(1)     | 127.3(2)   |
| C(11)-H(11A)  | 0.91(3)   | C(4)-N(1)-C(13)    | 120.5(2)   |
| C(12)-H(12B)  | 0.9400    | C(4)-N(1)-C(14)    | 120.7(2)   |
| C(12A)-H(12A) | 0.9400    | C(13)-N(1)-C(14)   | 117.9(2)   |
| C(13)-H(13A)  | 0.9700    | C(1)-B(1)-C(24)    | 122.7(2)   |
| C(13)-H(13B)  | 0.9700    | C(1)-B(1)-C(15)    | 114.47(19) |
| C(13)-H(13C)  | 0.9700    | C(24)-B(1)-C(15)   | 122.73(19) |
| C(14)-H(14A)  | 0.9700    | C(3)-C(2)-C(1)     | 120.3(2)   |
| C(14)-H(14B)  | 0.9700    | C(3)-C(2)-C(7)     | 119.1(2)   |
| C(14)-H(14C)  | 0.9700    | C(1)-C(2)-C(7)     | 120.64(19) |
| C(15)-C(16)   | 1.406(3)  | C(5)-C(6)-C(1)     | 124.4(2)   |
| C(15)-C(23)   | 1.406(3)  | C(5)-C(6)-H(6A)    | 117.8      |
| C(16)-C(18)   | 1.393(3)  | C(1)-C(6)-H(6A)    | 117.8      |
| C(16)-C(17)   | 1.511(4)  | C(6)-C(5)-C(4)     | 120.1(2)   |
| C(17)-H(17A)  | 0.9700    | C(6)-C(5)-H(5A)    | 119.9      |
| C(17)-H(17B)  | 0.9700    | C(4)-C(5)-H(5A)    | 119.9      |
| C(17)-H(17C)  | 0.9700    | N(1)-C(4)-C(3)     | 121.8(2)   |
| C(18)-C(19)   | 1.376(3)  | N(1)-C(4)-C(5)     | 121.3(2)   |
| C(18)-H(18A)  | 0.9400    | C(3)-C(4)-C(5)     | 116.9(2)   |
| C(19)-C(21)   | 1.383(3)  | C(2)-C(3)-C(4)     | 123.0(2)   |
| C(19)-C(20)   | 1.514(3)  | C(2)-C(3)-H(3A)    | 118.5      |
| C(20)-H(20A)  | 0.9700    | C(4)-C(3)-H(3A)    | 118.5      |
| C(20)-H(20B)  | 0.9700    | C(8)-C(7)-C(2)     | 126.5(2)   |
| C(20)-H(20C)  | 0.9700    | C(8)-C(7)-H(7A)    | 116.7      |
| C(21)-C(23)   | 1.388(3)  | C(2)-C(7)-H(7A)    | 116.7      |
| C(21)-H(21A)  | 0.9400    | C(11)-C(9)-C(10)   | 109.8(2)   |

|                     |            |                     |            |
|---------------------|------------|---------------------|------------|
| C(11)-C(9)-C(8)     | 124.4(2)   | H(20A)-C(20)-H(20B) | 109.5      |
| C(10)-C(9)-C(8)     | 125.8(2)   | C(19)-C(20)-H(20C)  | 109.5      |
| C(7)-C(8)-C(9)      | 125.3(2)   | H(20A)-C(20)-H(20C) | 109.5      |
| C(7)-C(8)-H(8A)     | 117.3      | H(20B)-C(20)-H(20C) | 109.5      |
| C(9)-C(8)-H(8A)     | 117.3      | C(19)-C(21)-C(23)   | 122.1(2)   |
| C(9)-C(10)-C(12A)   | 110.1(9)   | C(19)-C(21)-H(21A)  | 118.9      |
| C(9)-C(10)-S(1)     | 114.7(3)   | C(23)-C(21)-H(21A)  | 118.9      |
| C(9)-C(10)-H(10A)   | 127.4(16)  | C(21)-C(23)-C(15)   | 120.6(2)   |
| C(12A)-C(10)-H(10A) | 122.5(19)  | C(21)-C(23)-C(22)   | 118.0(2)   |
| S(1)-C(10)-H(10A)   | 117.8(16)  | C(15)-C(23)-C(22)   | 121.5(2)   |
| C(9)-C(11)-C(12)    | 112.4(10)  | C(31)-C(24)-C(25)   | 117.07(19) |
| C(9)-C(11)-S(1A)    | 115.7(2)   | C(31)-C(24)-B(1)    | 121.6(2)   |
| C(9)-C(11)-H(11A)   | 123.6(17)  | C(25)-C(24)-B(1)    | 121.33(19) |
| C(12)-C(11)-H(11A)  | 123.9(19)  | C(27)-C(25)-C(24)   | 120.5(2)   |
| S(1A)-C(11)-H(11A)  | 120.6(17)  | C(27)-C(25)-C(26)   | 116.9(2)   |
| C(11)-C(12)-S(1)    | 106.9(14)  | C(24)-C(25)-C(26)   | 122.6(2)   |
| C(11)-C(12)-H(12B)  | 126.6      | C(25)-C(26)-H(26A)  | 109.5      |
| S(1)-C(12)-H(12B)   | 126.6      | C(25)-C(26)-H(26B)  | 109.5      |
| C(10)-C(12A)-S(1A)  | 110.8(13)  | H(26A)-C(26)-H(26B) | 109.5      |
| C(10)-C(12A)-H(12A) | 124.6      | C(25)-C(26)-H(26C)  | 109.5      |
| S(1A)-C(12A)-H(12A) | 124.6      | H(26A)-C(26)-H(26C) | 109.5      |
| N(1)-C(13)-H(13A)   | 109.5      | H(26B)-C(26)-H(26C) | 109.5      |
| N(1)-C(13)-H(13B)   | 109.5      | C(28)-C(27)-C(25)   | 122.4(2)   |
| H(13A)-C(13)-H(13B) | 109.5      | C(28)-C(27)-H(27A)  | 118.8      |
| N(1)-C(13)-H(13C)   | 109.5      | C(25)-C(27)-H(27A)  | 118.8      |
| H(13A)-C(13)-H(13C) | 109.5      | C(27)-C(28)-C(30)   | 117.5(2)   |
| H(13B)-C(13)-H(13C) | 109.5      | C(27)-C(28)-C(29)   | 121.3(2)   |
| N(1)-C(14)-H(14A)   | 109.5      | C(30)-C(28)-C(29)   | 121.3(2)   |
| N(1)-C(14)-H(14B)   | 109.5      | C(28)-C(29)-H(29A)  | 109.5      |
| H(14A)-C(14)-H(14B) | 109.5      | C(28)-C(29)-H(29B)  | 109.5      |
| N(1)-C(14)-H(14C)   | 109.5      | H(29A)-C(29)-H(29B) | 109.5      |
| H(14A)-C(14)-H(14C) | 109.5      | C(28)-C(29)-H(29C)  | 109.5      |
| H(14B)-C(14)-H(14C) | 109.5      | H(29A)-C(29)-H(29C) | 109.5      |
| C(16)-C(15)-C(23)   | 117.4(2)   | H(29B)-C(29)-H(29C) | 109.5      |
| C(16)-C(15)-B(1)    | 121.3(2)   | C(28)-C(30)-C(31)   | 122.1(2)   |
| C(23)-C(15)-B(1)    | 120.72(19) | C(28)-C(30)-H(30A)  | 119.0      |
| C(18)-C(16)-C(15)   | 120.0(2)   | C(31)-C(30)-H(30A)  | 119.0      |
| C(18)-C(16)-C(17)   | 118.2(2)   | C(30)-C(31)-C(24)   | 120.5(2)   |
| C(15)-C(16)-C(17)   | 121.8(2)   | C(30)-C(31)-C(32)   | 117.9(2)   |
| C(16)-C(17)-H(17A)  | 109.5      | C(24)-C(31)-C(32)   | 121.5(2)   |
| C(16)-C(17)-H(17B)  | 109.5      | C(31)-C(32)-H(32A)  | 109.5      |
| H(17A)-C(17)-H(17B) | 109.5      | C(31)-C(32)-H(32B)  | 109.5      |
| C(16)-C(17)-H(17C)  | 109.5      | H(32A)-C(32)-H(32B) | 109.5      |
| H(17A)-C(17)-H(17C) | 109.5      | C(31)-C(32)-H(32C)  | 109.5      |
| H(17B)-C(17)-H(17C) | 109.5      | H(32A)-C(32)-H(32C) | 109.5      |
| C(19)-C(18)-C(16)   | 122.7(2)   | H(32B)-C(32)-H(32C) | 109.5      |
| C(19)-C(18)-H(18A)  | 118.7      | C(23)-C(22)-H(22A)  | 109.5      |
| C(16)-C(18)-H(18A)  | 118.7      | C(23)-C(22)-H(22B)  | 109.5      |
| C(18)-C(19)-C(21)   | 117.2(2)   | H(22A)-C(22)-H(22B) | 109.5      |
| C(18)-C(19)-C(20)   | 120.9(2)   | C(23)-C(22)-H(22C)  | 109.5      |
| C(21)-C(19)-C(20)   | 121.9(2)   | H(22A)-C(22)-H(22C) | 109.5      |
| C(19)-C(20)-H(20A)  | 109.5      | H(22B)-C(22)-H(22C) | 109.5      |
| C(19)-C(20)-H(20B)  | 109.5      |                     |            |

**Table S95.** Anisotropic displacement parameters ( $\text{\AA}^2 \times 10^3$ ) for **7a**. The anisotropic displacement factor exponent takes the form:  $-2\pi^2 [ h^2 a^{*2} U^{11} + \dots + 2 h k a^* b^* U^{12} ]$

|        | U <sup>11</sup> | U <sup>22</sup> | U <sup>33</sup> | U <sup>23</sup> | U <sup>13</sup> | U <sup>12</sup> |
|--------|-----------------|-----------------|-----------------|-----------------|-----------------|-----------------|
| S(1)   | 50(1)           | 45(1)           | 31(1)           | -4(1)           | -6(1)           | -6(1)           |
| S(1A)  | 66(1)           | 40(1)           | 49(1)           | -7(1)           | -5(1)           | -7(1)           |
| C(1)   | 33(1)           | 30(1)           | 27(1)           | 0(1)            | 0(1)            | -2(1)           |
| N(1)   | 49(1)           | 39(1)           | 39(1)           | 7(1)            | -6(1)           | 8(1)            |
| B(1)   | 36(1)           | 32(1)           | 25(1)           | -1(1)           | 8(1)            | 3(1)            |
| C(2)   | 32(1)           | 29(1)           | 27(1)           | 1(1)            | 5(1)            | -1(1)           |
| C(6)   | 42(1)           | 29(1)           | 35(1)           | -2(1)           | -2(1)           | -2(1)           |
| C(5)   | 43(1)           | 34(1)           | 30(1)           | 1(1)            | -6(1)           | -4(1)           |
| C(4)   | 32(1)           | 35(1)           | 31(1)           | 8(1)            | 3(1)            | 0(1)            |
| C(3)   | 37(1)           | 28(1)           | 33(1)           | 0(1)            | 7(1)            | 3(1)            |
| C(7)   | 37(1)           | 31(1)           | 30(1)           | -1(1)           | 3(1)            | 4(1)            |
| C(9)   | 36(1)           | 34(1)           | 30(1)           | -3(1)           | 5(1)            | -3(1)           |
| C(8)   | 42(1)           | 33(1)           | 31(1)           | 1(1)            | 2(1)            | 0(1)            |
| C(10)  | 63(2)           | 36(1)           | 42(2)           | -2(1)           | -9(1)           | -1(1)           |
| C(11)  | 66(2)           | 30(1)           | 54(2)           | -2(1)           | -10(2)          | -1(1)           |
| C(12)  | 190(20)         | 320(30)         | 140(19)         | -6(18)          | 51(16)          | -18(19)         |
| C(12A) | 74(11)          | 63(7)           | 48(8)           | 23(6)           | -19(6)          | -20(6)          |
| C(13)  | 58(2)           | 47(2)           | 54(2)           | 9(1)            | 1(1)            | 17(1)           |
| C(14)  | 54(2)           | 57(2)           | 48(2)           | 10(1)           | -16(1)          | 5(1)            |
| C(15)  | 33(1)           | 30(1)           | 28(1)           | 2(1)            | -2(1)           | 5(1)            |
| C(16)  | 38(1)           | 34(1)           | 43(2)           | -2(1)           | 3(1)            | 6(1)            |
| C(17)  | 50(2)           | 58(2)           | 106(3)          | -22(2)          | 31(2)           | 1(1)            |
| C(18)  | 52(2)           | 35(1)           | 41(2)           | -6(1)           | 4(1)            | 13(1)           |
| C(19)  | 49(2)           | 28(1)           | 34(1)           | 0(1)            | -10(1)          | 4(1)            |
| C(20)  | 75(2)           | 35(1)           | 58(2)           | -7(1)           | -11(2)          | -2(1)           |
| C(21)  | 38(1)           | 35(1)           | 38(1)           | 5(1)            | -3(1)           | -1(1)           |
| C(23)  | 34(1)           | 30(1)           | 32(1)           | 2(1)            | -2(1)           | 3(1)            |
| C(24)  | 33(1)           | 27(1)           | 28(1)           | 0(1)            | 1(1)            | 4(1)            |
| C(25)  | 34(1)           | 32(1)           | 31(1)           | 0(1)            | 1(1)            | 4(1)            |
| C(26)  | 49(2)           | 61(2)           | 37(2)           | 10(1)           | 5(1)            | -8(1)           |
| C(27)  | 33(1)           | 30(1)           | 43(2)           | 1(1)            | 2(1)            | 1(1)            |
| C(28)  | 40(1)           | 31(1)           | 41(2)           | -5(1)           | -8(1)           | 6(1)            |
| C(29)  | 63(2)           | 56(2)           | 62(2)           | -3(2)           | -28(2)          | -6(2)           |
| C(30)  | 49(1)           | 38(1)           | 28(1)           | 1(1)            | -6(1)           | 9(1)            |
| C(31)  | 39(1)           | 32(1)           | 31(1)           | 4(1)            | 0(1)            | 6(1)            |
| C(32)  | 58(2)           | 66(2)           | 37(2)           | 18(1)           | 3(1)            | -7(1)           |
| C(22)  | 40(1)           | 44(2)           | 68(2)           | -6(1)           | 18(1)           | -1(1)           |

**Table S96.** Hydrogen coordinates ( $\times 10^4$ ) and isotropic displacement parameters ( $\text{\AA}^2 \times 10^3$ ) for **7a**.

|        | x        | y        | z        | U(eq) |
|--------|----------|----------|----------|-------|
| H(6A)  | 7427     | 7485     | 6055     | 43    |
| H(5A)  | 9166     | 6878     | 6971     | 44    |
| H(3A)  | 8207     | 5478     | 5307     | 39    |
| H(7A)  | 5694     | 6244     | 3665     | 39    |
| H(8A)  | 6039     | 5109     | 4427     | 43    |
| H(10A) | 3610(30) | 5875(12) | 2519(16) | 50    |

|        |          |          |          |     |
|--------|----------|----------|----------|-----|
| H(11A) | 5210(30) | 4213(12) | 3339(17) | 50  |
| H(12B) | 3525     | 4001     | 1803     | 257 |
| H(12A) | 2617     | 5203     | 1314     | 77  |
| H(13A) | 10524    | 5043     | 6019     | 81  |
| H(13B) | 9107     | 4909     | 6601     | 81  |
| H(13C) | 11041    | 4920     | 7013     | 81  |
| H(14A) | 11412    | 6383     | 7452     | 83  |
| H(14B) | 11870    | 5706     | 7762     | 83  |
| H(14C) | 10173    | 6013     | 7962     | 83  |
| H(17A) | 2704     | 8630     | 5531     | 104 |
| H(17B) | 3255     | 7936     | 5664     | 104 |
| H(17C) | 2516     | 8177     | 4737     | 104 |
| H(18A) | 4925     | 9285     | 5651     | 52  |
| H(20A) | 7021     | 10037    | 5870     | 87  |
| H(20B) | 8240     | 10060    | 5163     | 87  |
| H(20C) | 8865     | 9754     | 6064     | 87  |
| H(21A) | 9256     | 8935     | 4765     | 45  |
| H(26A) | 1666     | 6599     | 5445     | 74  |
| H(26B) | 3614     | 6773     | 5569     | 74  |
| H(26C) | 3024     | 6109     | 5254     | 74  |
| H(27A) | 304      | 6321     | 3994     | 43  |
| H(29A) | -614     | 6543     | 1756     | 96  |
| H(29B) | -1740    | 6805     | 2421     | 96  |
| H(29C) | -1082    | 6121     | 2503     | 96  |
| H(30A) | 1745     | 7246     | 2036     | 48  |
| H(32A) | 4098     | 7848     | 2167     | 81  |
| H(32B) | 5634     | 7468     | 2657     | 81  |
| H(32C) | 4969     | 8058     | 3089     | 81  |
| H(22A) | 9376     | 8083     | 3811     | 75  |
| H(22B) | 8079     | 7533     | 3806     | 75  |
| H(22C) | 9543     | 7620     | 4591     | 75  |

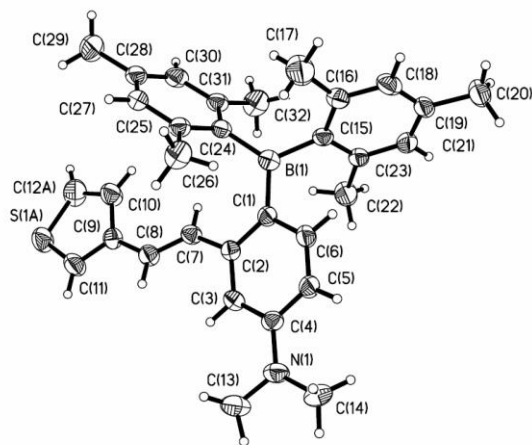

**Figure S156.** Structure of **7a**.

**Table S97.** Crystal data and structure refinement for **9a**.

|                     |                                                  |
|---------------------|--------------------------------------------------|
| Identification code | <b>9a</b>                                        |
| Empirical formula   | C <sub>34</sub> H <sub>39</sub> B N <sub>2</sub> |
| Formula weight      | 486.48                                           |
| Temperature         | 180(2) K                                         |
| Wavelength          | 0.71073 Å                                        |

|                                   |                                                     |                                        |
|-----------------------------------|-----------------------------------------------------|----------------------------------------|
| Crystal system                    | Monoclinic                                          |                                        |
| Space group                       | P2 <sub>1</sub> /n                                  |                                        |
| Unit cell dimensions              | a = 8.410(5) Å<br>b = 34.22(2) Å<br>c = 10.140(7) Å | α = 90°.<br>β = 97.87(2)°.<br>γ = 90°. |
| Volume                            | 2891(3) Å <sup>3</sup>                              |                                        |
| Z                                 | 4                                                   |                                        |
| Density (calculated)              | 1.118 Mg/m <sup>3</sup>                             |                                        |
| Absorption coefficient            | 0.064 mm <sup>-1</sup>                              |                                        |
| F(000)                            | 1048                                                |                                        |
| Crystal size                      | 0.260 x 0.210 x 0.177 mm <sup>3</sup>               |                                        |
| Theta range for data collection   | 2.516 to 27.275°.                                   |                                        |
| Index ranges                      | -10 ≤ h ≤ 10, -44 ≤ k ≤ 43, -12 ≤ l ≤ 11            |                                        |
| Reflections collected             | 28859                                               |                                        |
| Independent reflections           | 6298 [R(int) = 0.1426]                              |                                        |
| Completeness to theta = 25.242°   | 99.8 %                                              |                                        |
| Absorption correction             | Multi-sca                                           |                                        |
| Max. and min. transmission        | 0.989 and 0.984                                     |                                        |
| Refinement method                 | Full-matrix least-squares on F <sup>2</sup>         |                                        |
| Data / restraints / parameters    | 6298 / 0 / 344                                      |                                        |
| Goodness-of-fit on F <sup>2</sup> | 1.030                                               |                                        |
| Final R indices [I > 2σ(I)]       | R1 = 0.0729, wR2 = 0.1755                           |                                        |
| R indices (all data)              | R1 = 0.1708, wR2 = 0.2124                           |                                        |
| Extinction coefficient            | 0.010(2)                                            |                                        |
| Largest diff. peak and hole       | 0.213 and -0.209 e.Å <sup>-3</sup>                  |                                        |

**Table S98.** Atomic coordinates ( $\times 10^4$ ) and equivalent isotropic displacement parameters ( $\text{Å}^2 \times 10^3$ ) for **9a**.  $U(\text{eq})$  is defined as one third of the trace of the orthogonalized  $U_{ij}$  tensor.

|       | x        | y       | z        | U(eq) |
|-------|----------|---------|----------|-------|
| B(1)  | 7298(3)  | 3936(1) | 4501(3)  | 36(1) |
| N(1)  | 8197(3)  | 2630(1) | -114(2)  | 47(1) |
| N(2)  | 10796(3) | 3348(1) | 8339(3)  | 64(1) |
| C(1)  | 8293(3)  | 3568(1) | 5070(3)  | 36(1) |
| C(2)  | 8960(3)  | 3588(1) | 6413(3)  | 40(1) |
| C(3)  | 10072(3) | 3310(1) | 7030(3)  | 42(1) |
| C(4)  | 10395(3) | 2994(1) | 6239(3)  | 49(1) |
| C(5)  | 9688(3)  | 2960(1) | 4932(3)  | 48(1) |
| C(6)  | 8650(3)  | 3243(1) | 4291(3)  | 38(1) |
| C(7)  | 7965(3)  | 3203(1) | 2896(3)  | 43(1) |
| C(8)  | 8330(3)  | 2945(1) | 2001(3)  | 45(1) |
| C(9)  | 7671(3)  | 2930(1) | 580(3)   | 42(1) |
| C(10) | 6608(3)  | 3204(1) | -46(3)   | 55(1) |
| C(11) | 6093(3)  | 3177(1) | -1396(3) | 60(1) |
| C(12) | 6620(3)  | 2870(1) | -2100(3) | 55(1) |
| C(13) | 7668(3)  | 2602(1) | -1434(3) | 50(1) |
| C(14) | 8259(4)  | 2260(1) | -2155(3) | 74(1) |
| C(15) | 11823(4) | 3042(1) | 8983(3)  | 76(1) |
| C(16) | 10374(4) | 3654(1) | 9169(3)  | 73(1) |
| C(17) | 6088(3)  | 4124(1) | 5387(2)  | 34(1) |
| C(18) | 4782(3)  | 3906(1) | 5755(2)  | 37(1) |
| C(19) | 4423(3)  | 3499(1) | 5244(3)  | 50(1) |

|       |          |         |         |       |
|-------|----------|---------|---------|-------|
| C(20) | 3734(3)  | 4073(1) | 6545(3) | 44(1) |
| C(21) | 3903(3)  | 4455(1) | 6989(3) | 48(1) |
| C(22) | 2721(4)  | 4629(1) | 7823(3) | 74(1) |
| C(23) | 5174(3)  | 4665(1) | 6621(3) | 48(1) |
| C(24) | 6268(3)  | 4510(1) | 5849(3) | 40(1) |
| C(25) | 7671(3)  | 4759(1) | 5580(3) | 54(1) |
| C(26) | 7578(3)  | 4118(1) | 3110(2) | 35(1) |
| C(27) | 6286(3)  | 4199(1) | 2079(3) | 42(1) |
| C(28) | 4553(3)  | 4110(1) | 2250(3) | 64(1) |
| C(29) | 6592(3)  | 4348(1) | 874(3)  | 48(1) |
| C(30) | 8137(3)  | 4441(1) | 613(3)  | 48(1) |
| C(31) | 8414(4)  | 4619(1) | -701(3) | 72(1) |
| C(32) | 9388(3)  | 4367(1) | 1624(3) | 46(1) |
| C(33) | 9155(3)  | 4204(1) | 2839(3) | 40(1) |
| C(34) | 10629(3) | 4134(1) | 3857(3) | 56(1) |

**Table S99.** Bond lengths [Å] and angles [°] for **9a**.

|              |          |              |          |
|--------------|----------|--------------|----------|
| B(1)-C(1)    | 1.576(4) | C(16)-H(16B) | 0.9800   |
| B(1)-C(17)   | 1.584(4) | C(16)-H(16C) | 0.9800   |
| B(1)-C(26)   | 1.589(4) | C(17)-C(24)  | 1.403(3) |
| N(1)-C(9)    | 1.353(3) | C(17)-C(18)  | 1.418(3) |
| N(1)-C(13)   | 1.355(4) | C(18)-C(20)  | 1.393(3) |
| N(2)-C(3)    | 1.388(4) | C(18)-C(19)  | 1.501(4) |
| N(2)-C(16)   | 1.421(4) | C(19)-H(19A) | 0.9800   |
| N(2)-C(15)   | 1.453(4) | C(19)-H(19B) | 0.9800   |
| C(1)-C(2)    | 1.402(4) | C(19)-H(19C) | 0.9800   |
| C(1)-C(6)    | 1.419(3) | C(20)-C(21)  | 1.383(4) |
| C(2)-C(3)    | 1.418(3) | C(20)-H(20)  | 0.9500   |
| C(2)-H(2)    | 0.9500   | C(21)-C(23)  | 1.380(4) |
| C(3)-C(4)    | 1.394(4) | C(21)-C(22)  | 1.512(4) |
| C(4)-C(5)    | 1.381(4) | C(22)-H(22A) | 0.9800   |
| C(4)-H(4)    | 0.9500   | C(22)-H(22B) | 0.9800   |
| C(5)-C(6)    | 1.402(3) | C(22)-H(22C) | 0.9800   |
| C(5)-H(5)    | 0.9500   | C(23)-C(24)  | 1.392(3) |
| C(6)-C(7)    | 1.459(4) | C(23)-H(23)  | 0.9500   |
| C(7)-C(8)    | 1.332(3) | C(24)-C(25)  | 1.512(3) |
| C(7)-H(7)    | 0.9500   | C(25)-H(25A) | 0.9800   |
| C(8)-C(9)    | 1.472(4) | C(25)-H(25B) | 0.9800   |
| C(8)-H(8)    | 0.9500   | C(25)-H(25C) | 0.9800   |
| C(9)-C(10)   | 1.387(4) | C(26)-C(33)  | 1.421(3) |
| C(10)-C(11)  | 1.381(4) | C(26)-C(27)  | 1.428(4) |
| C(10)-H(10)  | 0.9500   | C(27)-C(29)  | 1.380(4) |
| C(11)-C(12)  | 1.377(4) | C(27)-C(28)  | 1.522(3) |
| C(11)-H(11)  | 0.9500   | C(28)-H(28A) | 0.9800   |
| C(12)-C(13)  | 1.382(4) | C(28)-H(28B) | 0.9800   |
| C(12)-H(12)  | 0.9500   | C(28)-H(28C) | 0.9800   |
| C(13)-C(14)  | 1.501(4) | C(29)-C(30)  | 1.398(4) |
| C(14)-H(14A) | 0.9800   | C(29)-H(29)  | 0.9500   |
| C(14)-H(14B) | 0.9800   | C(30)-C(32)  | 1.388(4) |
| C(14)-H(14C) | 0.9800   | C(30)-C(31)  | 1.513(4) |
| C(15)-H(15A) | 0.9800   | C(31)-H(31A) | 0.9800   |
| C(15)-H(15B) | 0.9800   | C(31)-H(31B) | 0.9800   |
| C(15)-H(15C) | 0.9800   | C(31)-H(31C) | 0.9800   |
| C(16)-H(16A) | 0.9800   | C(32)-C(33)  | 1.391(4) |

|                     |          |                     |          |
|---------------------|----------|---------------------|----------|
| C(32)-H(32)         | 0.9500   | H(14B)-C(14)-H(14C) | 109.5    |
| C(33)-C(34)         | 1.520(4) | N(2)-C(15)-H(15A)   | 109.5    |
| C(34)-H(34A)        | 0.9800   | N(2)-C(15)-H(15B)   | 109.5    |
| C(34)-H(34B)        | 0.9800   | H(15A)-C(15)-H(15B) | 109.5    |
| C(34)-H(34C)        | 0.9800   | N(2)-C(15)-H(15C)   | 109.5    |
| C(1)-B(1)-C(17)     | 117.8(2) | H(15A)-C(15)-H(15C) | 109.5    |
| C(1)-B(1)-C(26)     | 120.2(2) | H(15B)-C(15)-H(15C) | 109.5    |
| C(17)-B(1)-C(26)    | 121.9(2) | N(2)-C(16)-H(16A)   | 109.5    |
| C(9)-N(1)-C(13)     | 118.8(2) | N(2)-C(16)-H(16B)   | 109.5    |
| C(3)-N(2)-C(16)     | 121.5(2) | H(16A)-C(16)-H(16B) | 109.5    |
| C(3)-N(2)-C(15)     | 121.2(3) | N(2)-C(16)-H(16C)   | 109.5    |
| C(16)-N(2)-C(15)    | 116.5(3) | H(16A)-C(16)-H(16C) | 109.5    |
| C(2)-C(1)-C(6)      | 119.4(2) | H(16B)-C(16)-H(16C) | 109.5    |
| C(2)-C(1)-B(1)      | 116.0(2) | C(24)-C(17)-C(18)   | 117.3(2) |
| C(6)-C(1)-B(1)      | 124.3(2) | C(24)-C(17)-B(1)    | 121.6(2) |
| C(1)-C(2)-C(3)      | 123.2(2) | C(18)-C(17)-B(1)    | 121.1(2) |
| C(1)-C(2)-H(2)      | 118.4    | C(20)-C(18)-C(17)   | 120.6(2) |
| C(3)-C(2)-H(2)      | 118.4    | C(20)-C(18)-C(19)   | 117.8(2) |
| N(2)-C(3)-C(4)      | 121.8(2) | C(17)-C(18)-C(19)   | 121.5(2) |
| N(2)-C(3)-C(2)      | 122.4(2) | C(18)-C(19)-H(19A)  | 109.5    |
| C(4)-C(3)-C(2)      | 115.8(3) | C(18)-C(19)-H(19B)  | 109.5    |
| C(5)-C(4)-C(3)      | 121.7(2) | H(19A)-C(19)-H(19B) | 109.5    |
| C(5)-C(4)-H(4)      | 119.2    | C(18)-C(19)-H(19C)  | 109.5    |
| C(3)-C(4)-H(4)      | 119.2    | H(19A)-C(19)-H(19C) | 109.5    |
| C(4)-C(5)-C(6)      | 123.1(3) | H(19B)-C(19)-H(19C) | 109.5    |
| C(4)-C(5)-H(5)      | 118.5    | C(21)-C(20)-C(18)   | 122.1(2) |
| C(6)-C(5)-H(5)      | 118.5    | C(21)-C(20)-H(20)   | 119.0    |
| C(5)-C(6)-C(1)      | 116.6(2) | C(18)-C(20)-H(20)   | 119.0    |
| C(5)-C(6)-C(7)      | 121.5(2) | C(23)-C(21)-C(20)   | 116.9(2) |
| C(1)-C(6)-C(7)      | 121.8(2) | C(23)-C(21)-C(22)   | 122.7(3) |
| C(8)-C(7)-C(6)      | 128.7(2) | C(20)-C(21)-C(22)   | 120.5(3) |
| C(8)-C(7)-H(7)      | 115.6    | C(21)-C(22)-H(22A)  | 109.5    |
| C(6)-C(7)-H(7)      | 115.6    | C(21)-C(22)-H(22B)  | 109.5    |
| C(7)-C(8)-C(9)      | 126.7(2) | H(22A)-C(22)-H(22B) | 109.5    |
| C(7)-C(8)-H(8)      | 116.6    | C(21)-C(22)-H(22C)  | 109.5    |
| C(9)-C(8)-H(8)      | 116.6    | H(22A)-C(22)-H(22C) | 109.5    |
| N(1)-C(9)-C(10)     | 120.7(3) | H(22B)-C(22)-H(22C) | 109.5    |
| N(1)-C(9)-C(8)      | 115.4(2) | C(21)-C(23)-C(24)   | 123.3(2) |
| C(10)-C(9)-C(8)     | 123.9(3) | C(21)-C(23)-H(23)   | 118.3    |
| C(11)-C(10)-C(9)    | 120.2(3) | C(24)-C(23)-H(23)   | 118.3    |
| C(11)-C(10)-H(10)   | 119.9    | C(23)-C(24)-C(17)   | 119.8(2) |
| C(9)-C(10)-H(10)    | 119.9    | C(23)-C(24)-C(25)   | 118.6(2) |
| C(12)-C(11)-C(10)   | 119.1(3) | C(17)-C(24)-C(25)   | 121.6(2) |
| C(12)-C(11)-H(11)   | 120.5    | C(24)-C(25)-H(25A)  | 109.5    |
| C(10)-C(11)-H(11)   | 120.5    | C(24)-C(25)-H(25B)  | 109.5    |
| C(11)-C(12)-C(13)   | 118.8(3) | H(25A)-C(25)-H(25B) | 109.5    |
| C(11)-C(12)-H(12)   | 120.6    | C(24)-C(25)-H(25C)  | 109.5    |
| C(13)-C(12)-H(12)   | 120.6    | H(25A)-C(25)-H(25C) | 109.5    |
| N(1)-C(13)-C(12)    | 122.4(3) | H(25B)-C(25)-H(25C) | 109.5    |
| N(1)-C(13)-C(14)    | 116.8(3) | C(33)-C(26)-C(27)   | 117.1(2) |
| C(12)-C(13)-C(14)   | 120.7(3) | C(33)-C(26)-B(1)    | 120.5(2) |
| C(13)-C(14)-H(14A)  | 109.5    | C(27)-C(26)-B(1)    | 122.4(2) |
| C(13)-C(14)-H(14B)  | 109.5    | C(29)-C(27)-C(26)   | 120.3(2) |
| H(14A)-C(14)-H(14B) | 109.5    | C(29)-C(27)-C(28)   | 118.2(2) |
| C(13)-C(14)-H(14C)  | 109.5    | C(26)-C(27)-C(28)   | 121.5(2) |
| H(14A)-C(14)-H(14C) | 109.5    | C(27)-C(28)-H(28A)  | 109.5    |

|                     |          |                     |          |
|---------------------|----------|---------------------|----------|
| C(27)-C(28)-H(28B)  | 109.5    | H(31A)-C(31)-H(31C) | 109.5    |
| H(28A)-C(28)-H(28B) | 109.5    | H(31B)-C(31)-H(31C) | 109.5    |
| C(27)-C(28)-H(28C)  | 109.5    | C(30)-C(32)-C(33)   | 122.9(2) |
| H(28A)-C(28)-H(28C) | 109.5    | C(30)-C(32)-H(32)   | 118.6    |
| H(28B)-C(28)-H(28C) | 109.5    | C(33)-C(32)-H(32)   | 118.6    |
| C(27)-C(29)-C(30)   | 122.9(3) | C(32)-C(33)-C(26)   | 120.2(2) |
| C(27)-C(29)-H(29)   | 118.6    | C(32)-C(33)-C(34)   | 117.7(2) |
| C(30)-C(29)-H(29)   | 118.6    | C(26)-C(33)-C(34)   | 122.1(2) |
| C(32)-C(30)-C(29)   | 116.6(3) | C(33)-C(34)-H(34A)  | 109.5    |
| C(32)-C(30)-C(31)   | 122.1(2) | C(33)-C(34)-H(34B)  | 109.5    |
| C(29)-C(30)-C(31)   | 121.2(3) | H(34A)-C(34)-H(34B) | 109.5    |
| C(30)-C(31)-H(31A)  | 109.5    | C(33)-C(34)-H(34C)  | 109.5    |
| C(30)-C(31)-H(31B)  | 109.5    | H(34A)-C(34)-H(34C) | 109.5    |
| H(31A)-C(31)-H(31B) | 109.5    | H(34B)-C(34)-H(34C) | 109.5    |
| C(30)-C(31)-H(31C)  | 109.5    |                     |          |

**Table S100.** Anisotropic displacement parameters ( $\text{\AA}^2 \times 10^3$ ) for **9a**. The anisotropic displacement factor exponent takes the form:  $-2\pi^2 [h^2 a^{*2} U^{11} + \dots + 2 h k a^* b^* U^{12}]$

|       | U <sup>11</sup> | U <sup>22</sup> | U <sup>33</sup> | U <sup>23</sup> | U <sup>13</sup> | U <sup>12</sup> |
|-------|-----------------|-----------------|-----------------|-----------------|-----------------|-----------------|
| B(1)  | 30(1)           | 42(2)           | 35(2)           | -2(1)           | -3(1)           | -2(1)           |
| N(1)  | 59(1)           | 41(1)           | 41(2)           | -3(1)           | 8(1)            | -4(1)           |
| N(2)  | 79(2)           | 64(2)           | 43(2)           | 4(1)            | -12(1)          | 18(1)           |
| C(1)  | 34(1)           | 41(1)           | 34(2)           | 4(1)            | 7(1)            | 4(1)            |
| C(2)  | 41(1)           | 42(2)           | 37(2)           | 3(1)            | 8(1)            | 3(1)            |
| C(3)  | 41(1)           | 49(2)           | 36(2)           | 7(1)            | 3(1)            | 1(1)            |
| C(4)  | 46(2)           | 50(2)           | 51(2)           | 11(2)           | 7(1)            | 15(1)           |
| C(5)  | 52(2)           | 45(2)           | 45(2)           | -1(1)           | 7(2)            | 13(1)           |
| C(6)  | 35(1)           | 41(2)           | 39(2)           | 6(1)            | 7(1)            | 4(1)            |
| C(7)  | 39(1)           | 42(2)           | 46(2)           | 3(1)            | 6(1)            | 3(1)            |
| C(8)  | 50(2)           | 40(2)           | 44(2)           | 0(1)            | 3(1)            | 7(1)            |
| C(9)  | 42(1)           | 39(2)           | 43(2)           | 1(1)            | 7(1)            | -5(1)           |
| C(10) | 66(2)           | 51(2)           | 49(2)           | 0(2)            | 6(2)            | 8(2)            |
| C(11) | 67(2)           | 62(2)           | 48(2)           | 8(2)            | -4(2)           | 9(2)            |
| C(12) | 66(2)           | 55(2)           | 42(2)           | 3(2)            | 4(2)            | -14(2)          |
| C(13) | 61(2)           | 45(2)           | 44(2)           | 2(1)            | 10(2)           | -11(1)          |
| C(14) | 120(3)          | 56(2)           | 47(2)           | -9(2)           | 16(2)           | 2(2)            |
| C(15) | 74(2)           | 88(2)           | 61(2)           | 22(2)           | -13(2)          | 12(2)           |
| C(16) | 89(2)           | 78(2)           | 45(2)           | 3(2)            | -9(2)           | -1(2)           |
| C(17) | 34(1)           | 37(1)           | 31(2)           | 5(1)            | 1(1)            | 7(1)            |
| C(18) | 34(1)           | 41(1)           | 36(2)           | 7(1)            | 3(1)            | 5(1)            |
| C(19) | 51(2)           | 46(2)           | 55(2)           | 2(1)            | 10(1)           | -3(1)           |
| C(20) | 37(1)           | 54(2)           | 42(2)           | 8(1)            | 10(1)           | 4(1)            |
| C(21) | 45(2)           | 56(2)           | 44(2)           | 2(1)            | 12(1)           | 14(1)           |
| C(22) | 70(2)           | 80(2)           | 78(3)           | -8(2)           | 34(2)           | 18(2)           |
| C(23) | 53(2)           | 41(2)           | 49(2)           | -4(1)           | 4(1)            | 9(1)            |
| C(24) | 39(1)           | 43(2)           | 36(2)           | 4(1)            | 3(1)            | 5(1)            |
| C(25) | 60(2)           | 47(2)           | 55(2)           | -1(1)           | 11(2)           | -5(1)           |
| C(26) | 31(1)           | 39(1)           | 36(2)           | 1(1)            | 6(1)            | 7(1)            |
| C(27) | 36(1)           | 49(2)           | 41(2)           | 4(1)            | 5(1)            | 6(1)            |
| C(28) | 37(2)           | 96(2)           | 57(2)           | 20(2)           | -4(1)           | 0(2)            |
| C(29) | 48(2)           | 58(2)           | 37(2)           | 7(1)            | 0(1)            | 9(1)            |
| C(30) | 57(2)           | 54(2)           | 37(2)           | 2(1)            | 17(1)           | 6(1)            |



|       |       |       |       |       |       |       |
|-------|-------|-------|-------|-------|-------|-------|
| C(31) | 82(2) | 94(2) | 45(2) | 17(2) | 19(2) | 5(2)  |
| C(32) | 41(1) | 54(2) | 47(2) | 5(1)  | 16(1) | 4(1)  |
| C(33) | 40(1) | 42(2) | 40(2) | 5(1)  | 9(1)  | 5(1)  |
| C(34) | 35(1) | 74(2) | 59(2) | 18(2) | 5(1)  | -1(1) |

**Table S101.** Hydrogen coordinates ( $\times 10^4$ ) and isotropic displacement parameters ( $\text{\AA}^2 \times 10^3$ ) for **9a**.

|        | x     | y    | z     | U(eq) |
|--------|-------|------|-------|-------|
| H(2)   | 8653  | 3798 | 6936  | 48    |
| H(4)   | 11120 | 2798 | 6609  | 59    |
| H(5)   | 9917  | 2735 | 4445  | 57    |
| H(7)   | 7149  | 3386 | 2583  | 51    |
| H(8)   | 9095  | 2750 | 2312  | 54    |
| H(10)  | 6234  | 3411 | 455   | 66    |
| H(11)  | 5384  | 3367 | -1833 | 72    |
| H(12)  | 6270  | 2843 | -3026 | 66    |
| H(14A) | 7593  | 2030 | -2039 | 111   |
| H(14B) | 9376  | 2204 | -1792 | 111   |
| H(14C) | 8193  | 2321 | -3105 | 111   |
| H(15A) | 12623 | 2969 | 8411  | 115   |
| H(15B) | 11170 | 2814 | 9136  | 115   |
| H(15C) | 12369 | 3138 | 9837  | 115   |
| H(16A) | 10640 | 3907 | 8797  | 109   |
| H(16B) | 10972 | 3625 | 10063 | 109   |
| H(16C) | 9220  | 3644 | 9221  | 109   |
| H(19A) | 3817  | 3512 | 4348  | 76    |
| H(19B) | 3786  | 3362 | 5839  | 76    |
| H(19C) | 5432  | 3358 | 5211  | 76    |
| H(20)  | 2877  | 3920 | 6787  | 53    |
| H(22A) | 1632  | 4606 | 7343  | 110   |
| H(22B) | 2980  | 4905 | 7998  | 110   |
| H(22C) | 2787  | 4487 | 8669  | 110   |
| H(23)  | 5309  | 4928 | 6909  | 58    |
| H(25A) | 7704  | 4772 | 4619  | 80    |
| H(25B) | 8672  | 4645 | 6022  | 80    |
| H(25C) | 7547  | 5024 | 5924  | 80    |
| H(28A) | 3837  | 4208 | 1478  | 97    |
| H(28B) | 4293  | 4236 | 3060  | 97    |
| H(28C) | 4414  | 3826 | 2321  | 97    |
| H(29)  | 5715  | 4388 | 192   | 58    |
| H(31A) | 7912  | 4455 | -1433 | 109   |
| H(31B) | 9570  | 4637 | -739  | 109   |
| H(31C) | 7941  | 4881 | -783  | 109   |
| H(32)  | 10450 | 4431 | 1480  | 56    |
| H(34A) | 10869 | 3853 | 3908  | 84    |
| H(34B) | 10423 | 4227 | 4731  | 84    |
| H(34C) | 11547 | 4275 | 3589  | 84    |

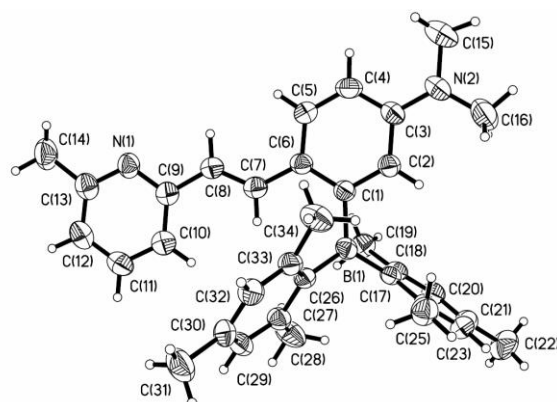

**Figure S157.** Structure of **9a**.

**Table S102.** Crystal data and structure refinement for **1c**.

|                                   |                                                  |                               |
|-----------------------------------|--------------------------------------------------|-------------------------------|
| Identification code               | <b>1c</b>                                        |                               |
| Empirical formula                 | C <sub>45</sub> H <sub>49</sub> B N <sub>2</sub> |                               |
| Formula weight                    | 628.67                                           |                               |
| Temperature                       | 180(2) K                                         |                               |
| Wavelength                        | 0.71073 Å                                        |                               |
| Crystal system                    | Triclinic                                        |                               |
| Space group                       | P-1                                              |                               |
| Unit cell dimensions              | a = 11.4473(10) Å                                | $\alpha = 94.282(4)^\circ$ .  |
|                                   | b = 11.8684(11) Å                                | $\beta = 106.166(3)^\circ$ .  |
|                                   | c = 15.9919(15) Å                                | $\gamma = 114.679(3)^\circ$ . |
| Volume                            | 1850.2(3) Å <sup>3</sup>                         |                               |
| Z                                 | 2                                                |                               |
| Density (calculated)              | 1.128 Mg/m <sup>3</sup>                          |                               |
| Absorption coefficient            | 0.064 mm <sup>-1</sup>                           |                               |
| F(000)                            | 676                                              |                               |
| Crystal size                      | 0.348 x 0.233 x 0.110 mm <sup>3</sup>            |                               |
| Theta range for data collection   | 2.718 to 27.174°.                                |                               |
| Index ranges                      | -14 ≤ h ≤ 14, -15 ≤ k ≤ 15, -20 ≤ l ≤ 20         |                               |
| Reflections collected             | 21084                                            |                               |
| Independent reflections           | 8129 [R(int) = 0.1347]                           |                               |
| Completeness to theta = 25.242°   | 99.1 %                                           |                               |
| Absorption correction             | Semi-empirical from equivalents                  |                               |
| Max. and min. transmission        | 0.993 and 0.978                                  |                               |
| Refinement method                 | Full-matrix least-squares on F <sup>2</sup>      |                               |
| Data / restraints / parameters    | 8129 / 0 / 441                                   |                               |
| Goodness-of-fit on F <sup>2</sup> | 0.972                                            |                               |
| Final R indices [I > 2σ(I)]       | R1 = 0.0746, wR2 = 0.1766                        |                               |
| R indices (all data)              | R1 = 0.1533, wR2 = 0.2135                        |                               |
| Extinction coefficient            | n/a                                              |                               |
| Largest diff. peak and hole       | 0.251 and -0.266 e.Å <sup>-3</sup>               |                               |

**Table S103.** Atomic coordinates ( $\times 10^4$ ) and equivalent isotropic displacement parameters (Å<sup>2</sup> × 10<sup>3</sup>) for **1c**. U(eq) is defined as one third of the trace of the orthogonalized U<sup>ij</sup> tensor.

|      | x       | y       | z       | U(eq) |
|------|---------|---------|---------|-------|
| N(1) | 6609(3) | 2150(2) | 5668(2) | 45(1) |
| C(1) | 3324(2) | 1802(2) | 6861(2) | 23(1) |

|       |          |          |          |       |
|-------|----------|----------|----------|-------|
| B(1)  | 3334(3)  | 3090(2)  | 6814(2)  | 24(1) |
| C(2)  | 3623(2)  | 1489(2)  | 7670(2)  | 27(1) |
| N(2)  | 3490(2)  | -1654(2) | 7226(1)  | 33(1) |
| C(3)  | 3555(3)  | 296(2)   | 7808(2)  | 30(1) |
| C(4)  | 3544(2)  | -504(2)  | 7146(2)  | 28(1) |
| C(5)  | 3665(2)  | -46(2)   | 6306(2)  | 26(1) |
| C(8)  | 4199(3)  | 1480(2)  | 5069(2)  | 35(1) |
| C(7)  | 3040(3)  | 1168(2)  | 5229(2)  | 30(1) |
| C(6)  | 2881(2)  | 730(2)   | 6071(2)  | 24(1) |
| C(9)  | 5363(3)  | 1447(2)  | 5712(2)  | 34(1) |
| C(10) | 5147(3)  | 738(2)   | 6371(2)  | 29(1) |
| C(11) | 6267(3)  | 794(2)   | 7005(2)  | 38(1) |
| C(12) | 7559(3)  | 1534(3)  | 6974(2)  | 49(1) |
| C(13) | 7669(3)  | 2178(3)  | 6301(2)  | 52(1) |
| C(14) | 3755(3)  | -2409(2) | 6615(2)  | 46(1) |
| C(15) | 3437(4)  | -2065(3) | 8055(2)  | 51(1) |
| C(16) | 2484(2)  | 3361(2)  | 5958(2)  | 25(1) |
| C(17) | 3113(2)  | 4405(2)  | 5589(2)  | 26(1) |
| C(18) | 4634(3)  | 5242(2)  | 5955(2)  | 34(1) |
| C(19) | 2338(3)  | 4651(2)  | 4859(2)  | 34(1) |
| C(20) | 936(3)   | 3921(3)  | 4476(2)  | 38(1) |
| C(21) | 115(3)   | 4227(3)  | 3695(2)  | 64(1) |
| C(22) | 326(3)   | 2909(2)  | 4842(2)  | 36(1) |
| C(23) | 1052(2)  | 2607(2)  | 5561(2)  | 29(1) |
| C(24) | 276(3)   | 1478(2)  | 5907(2)  | 37(1) |
| C(25) | 4226(3)  | 4184(2)  | 7694(2)  | 27(1) |
| C(26) | 5650(3)  | 4667(2)  | 8048(2)  | 32(1) |
| C(27) | 6442(3)  | 4225(3)  | 7609(2)  | 44(1) |
| C(28) | 6399(3)  | 5633(2)  | 8817(2)  | 40(1) |
| C(29) | 5796(3)  | 6133(2)  | 9260(2)  | 40(1) |
| C(30) | 6627(4)  | 7182(3)  | 10092(2) | 63(1) |
| C(31) | 4386(3)  | 5636(2)  | 8924(2)  | 37(1) |
| C(32) | 3599(3)  | 4697(2)  | 8147(2)  | 31(1) |
| C(33) | 2073(3)  | 4196(3)  | 7834(2)  | 43(1) |
| C(34) | 7653(3)  | 8141(3)  | 7679(2)  | 61(1) |
| C(35) | 8192(3)  | 9130(3)  | 8386(2)  | 59(1) |
| C(36) | 9466(3)  | 10124(3) | 8557(2)  | 56(1) |
| C(37) | 10195(3) | 10110(3) | 8020(2)  | 58(1) |
| C(38) | 9663(4)  | 9118(3)  | 7302(2)  | 61(1) |
| C(39) | 8383(4)  | 8126(3)  | 7131(2)  | 64(1) |
| C(40) | 10672(4) | 7486(5)  | 9177(3)  | 80(1) |
| C(41) | 11769(5) | 8596(5)  | 9670(3)  | 85(1) |
| C(42) | 12844(5) | 8560(5)  | 10270(3) | 91(1) |
| C(43) | 12858(5) | 7450(6)  | 10381(3) | 87(1) |
| C(44) | 11784(5) | 6335(5)  | 9893(3)  | 81(1) |
| C(45) | 10683(4) | 6348(5)  | 9283(3)  | 84(1) |

**Table S104.** Bond lengths [Å] and angles [°] for **1c**.

|            |          |            |          |
|------------|----------|------------|----------|
| N(1)-C(13) | 1.333(4) | B(1)-C(25) | 1.590(3) |
| N(1)-C(9)  | 1.344(3) | C(2)-C(3)  | 1.423(3) |
| C(1)-C(2)  | 1.364(3) | C(2)-H(2)  | 0.9500   |
| C(1)-C(6)  | 1.528(3) | N(2)-C(4)  | 1.357(3) |
| C(1)-B(1)  | 1.531(4) | N(2)-C(14) | 1.452(3) |
| B(1)-C(16) | 1.584(4) | N(2)-C(15) | 1.456(3) |

|              |          |                  |            |
|--------------|----------|------------------|------------|
| C(3)-C(4)    | 1.362(3) | C(30)-H(30A)     | 0.9800     |
| C(3)-H(3)    | 0.9500   | C(30)-H(30B)     | 0.9800     |
| C(4)-C(5)    | 1.506(3) | C(30)-H(30C)     | 0.9800     |
| C(5)-C(10)   | 1.525(3) | C(31)-C(32)      | 1.388(3)   |
| C(5)-C(6)    | 1.532(3) | C(31)-H(31)      | 0.9500     |
| C(5)-H(5)    | 1.0000   | C(32)-C(33)      | 1.502(4)   |
| C(8)-C(7)    | 1.325(3) | C(33)-H(33A)     | 0.9800     |
| C(8)-C(9)    | 1.456(4) | C(33)-H(33B)     | 0.9800     |
| C(8)-H(8)    | 0.9500   | C(33)-H(33C)     | 0.9800     |
| C(7)-C(6)    | 1.510(3) | C(34)-C(35)      | 1.358(4)   |
| C(7)-H(7)    | 0.9500   | C(34)-C(39)      | 1.373(5)   |
| C(6)-H(6)    | 1.0000   | C(34)-H(34)      | 0.9500     |
| C(9)-C(10)   | 1.408(4) | C(35)-C(36)      | 1.373(4)   |
| C(10)-C(11)  | 1.368(4) | C(35)-H(35)      | 0.9500     |
| C(11)-C(12)  | 1.387(4) | C(36)-C(37)      | 1.359(4)   |
| C(11)-H(11)  | 0.9500   | C(36)-H(36)      | 0.9500     |
| C(12)-C(13)  | 1.370(4) | C(37)-C(38)      | 1.373(5)   |
| C(12)-H(12)  | 0.9500   | C(37)-H(37)      | 0.9500     |
| C(13)-H(13)  | 0.9500   | C(38)-C(39)      | 1.377(5)   |
| C(14)-H(14A) | 0.9800   | C(38)-H(38)      | 0.9500     |
| C(14)-H(14B) | 0.9800   | C(39)-H(39)      | 0.9500     |
| C(14)-H(14C) | 0.9800   | C(40)-C(41)      | 1.359(6)   |
| C(15)-H(15A) | 0.9800   | C(40)-C(45)      | 1.378(6)   |
| C(15)-H(15B) | 0.9800   | C(40)-H(40)      | 0.9500     |
| C(15)-H(15C) | 0.9800   | C(41)-C(42)      | 1.352(6)   |
| C(16)-C(23)  | 1.415(3) | C(41)-H(41)      | 0.9500     |
| C(16)-C(17)  | 1.416(3) | C(42)-C(43)      | 1.349(6)   |
| C(17)-C(19)  | 1.387(4) | C(42)-H(42)      | 0.9500     |
| C(17)-C(18)  | 1.504(3) | C(43)-C(44)      | 1.351(6)   |
| C(18)-H(18A) | 0.9800   | C(43)-H(43)      | 0.9500     |
| C(18)-H(18B) | 0.9800   | C(44)-C(45)      | 1.370(6)   |
| C(18)-H(18C) | 0.9800   | C(44)-H(44)      | 0.9500     |
| C(19)-C(20)  | 1.383(4) | C(45)-H(45)      | 0.9500     |
| C(19)-H(19)  | 0.9500   | C(13)-N(1)-C(9)  | 116.7(3)   |
| C(20)-C(22)  | 1.381(4) | C(2)-C(1)-C(6)   | 113.8(2)   |
| C(20)-C(21)  | 1.508(4) | C(2)-C(1)-B(1)   | 119.4(2)   |
| C(21)-H(21A) | 0.9800   | C(6)-C(1)-B(1)   | 126.6(2)   |
| C(21)-H(21B) | 0.9800   | C(1)-B(1)-C(16)  | 123.7(2)   |
| C(21)-H(21C) | 0.9800   | C(1)-B(1)-C(25)  | 116.8(2)   |
| C(22)-C(23)  | 1.385(4) | C(16)-B(1)-C(25) | 119.5(2)   |
| C(22)-H(22)  | 0.9500   | C(1)-C(2)-C(3)   | 125.4(2)   |
| C(23)-C(24)  | 1.509(3) | C(1)-C(2)-H(2)   | 117.3      |
| C(24)-H(24A) | 0.9800   | C(3)-C(2)-H(2)   | 117.3      |
| C(24)-H(24B) | 0.9800   | C(4)-N(2)-C(14)  | 124.3(2)   |
| C(24)-H(24C) | 0.9800   | C(4)-N(2)-C(15)  | 119.0(2)   |
| C(25)-C(26)  | 1.401(3) | C(14)-N(2)-C(15) | 115.6(2)   |
| C(25)-C(32)  | 1.415(3) | C(4)-C(3)-C(2)   | 119.6(2)   |
| C(26)-C(28)  | 1.394(3) | C(4)-C(3)-H(3)   | 120.2      |
| C(26)-C(27)  | 1.514(4) | C(2)-C(3)-H(3)   | 120.2      |
| C(27)-H(27A) | 0.9800   | N(2)-C(4)-C(3)   | 123.2(2)   |
| C(27)-H(27B) | 0.9800   | N(2)-C(4)-C(5)   | 119.3(2)   |
| C(27)-H(27C) | 0.9800   | C(3)-C(4)-C(5)   | 117.4(2)   |
| C(28)-C(29)  | 1.373(4) | C(4)-C(5)-C(10)  | 112.6(2)   |
| C(28)-H(28)  | 0.9500   | C(4)-C(5)-C(6)   | 110.79(19) |
| C(29)-C(31)  | 1.384(4) | C(10)-C(5)-C(6)  | 109.68(19) |
| C(29)-C(30)  | 1.510(4) | C(4)-C(5)-H(5)   | 107.9      |

|                     |            |                     |          |
|---------------------|------------|---------------------|----------|
| C(10)-C(5)-H(5)     | 107.9      | C(22)-C(20)-C(19)   | 117.1(2) |
| C(6)-C(5)-H(5)      | 107.9      | C(22)-C(20)-C(21)   | 121.7(3) |
| C(7)-C(8)-C(9)      | 121.0(2)   | C(19)-C(20)-C(21)   | 121.2(3) |
| C(7)-C(8)-H(8)      | 119.5      | C(20)-C(21)-H(21A)  | 109.5    |
| C(9)-C(8)-H(8)      | 119.5      | C(20)-C(21)-H(21B)  | 109.5    |
| C(8)-C(7)-C(6)      | 120.6(2)   | H(21A)-C(21)-H(21B) | 109.5    |
| C(8)-C(7)-H(7)      | 119.7      | C(20)-C(21)-H(21C)  | 109.5    |
| C(6)-C(7)-H(7)      | 119.7      | H(21A)-C(21)-H(21C) | 109.5    |
| C(7)-C(6)-C(1)      | 114.29(18) | H(21B)-C(21)-H(21C) | 109.5    |
| C(7)-C(6)-C(5)      | 108.54(19) | C(20)-C(22)-C(23)   | 123.0(2) |
| C(1)-C(6)-C(5)      | 111.07(19) | C(20)-C(22)-H(22)   | 118.5    |
| C(7)-C(6)-H(6)      | 107.6      | C(23)-C(22)-H(22)   | 118.5    |
| C(1)-C(6)-H(6)      | 107.6      | C(22)-C(23)-C(16)   | 119.9(2) |
| C(5)-C(6)-H(6)      | 107.6      | C(22)-C(23)-C(24)   | 118.4(2) |
| N(1)-C(9)-C(10)     | 123.2(3)   | C(16)-C(23)-C(24)   | 121.7(2) |
| N(1)-C(9)-C(8)      | 117.6(2)   | C(23)-C(24)-H(24A)  | 109.5    |
| C(10)-C(9)-C(8)     | 119.1(2)   | C(23)-C(24)-H(24B)  | 109.5    |
| C(11)-C(10)-C(9)    | 118.0(2)   | H(24A)-C(24)-H(24B) | 109.5    |
| C(11)-C(10)-C(5)    | 125.5(2)   | C(23)-C(24)-H(24C)  | 109.5    |
| C(9)-C(10)-C(5)     | 116.5(2)   | H(24A)-C(24)-H(24C) | 109.5    |
| C(10)-C(11)-C(12)   | 119.3(3)   | H(24B)-C(24)-H(24C) | 109.5    |
| C(10)-C(11)-H(11)   | 120.3      | C(26)-C(25)-C(32)   | 117.8(2) |
| C(12)-C(11)-H(11)   | 120.3      | C(26)-C(25)-B(1)    | 121.5(2) |
| C(13)-C(12)-C(11)   | 118.6(3)   | C(32)-C(25)-B(1)    | 120.8(2) |
| C(13)-C(12)-H(12)   | 120.7      | C(28)-C(26)-C(25)   | 119.9(2) |
| C(11)-C(12)-H(12)   | 120.7      | C(28)-C(26)-C(27)   | 117.3(2) |
| N(1)-C(13)-C(12)    | 124.3(3)   | C(25)-C(26)-C(27)   | 122.7(2) |
| N(1)-C(13)-H(13)    | 117.9      | C(26)-C(27)-H(27A)  | 109.5    |
| C(12)-C(13)-H(13)   | 117.9      | C(26)-C(27)-H(27B)  | 109.5    |
| N(2)-C(14)-H(14A)   | 109.5      | H(27A)-C(27)-H(27B) | 109.5    |
| N(2)-C(14)-H(14B)   | 109.5      | C(26)-C(27)-H(27C)  | 109.5    |
| H(14A)-C(14)-H(14B) | 109.5      | H(27A)-C(27)-H(27C) | 109.5    |
| N(2)-C(14)-H(14C)   | 109.5      | H(27B)-C(27)-H(27C) | 109.5    |
| H(14A)-C(14)-H(14C) | 109.5      | C(29)-C(28)-C(26)   | 122.5(3) |
| H(14B)-C(14)-H(14C) | 109.5      | C(29)-C(28)-H(28)   | 118.7    |
| N(2)-C(15)-H(15A)   | 109.5      | C(26)-C(28)-H(28)   | 118.7    |
| N(2)-C(15)-H(15B)   | 109.5      | C(28)-C(29)-C(31)   | 117.7(2) |
| H(15A)-C(15)-H(15B) | 109.5      | C(28)-C(29)-C(30)   | 121.7(3) |
| N(2)-C(15)-H(15C)   | 109.5      | C(31)-C(29)-C(30)   | 120.6(3) |
| H(15A)-C(15)-H(15C) | 109.5      | C(29)-C(30)-H(30A)  | 109.5    |
| H(15B)-C(15)-H(15C) | 109.5      | C(29)-C(30)-H(30B)  | 109.5    |
| C(23)-C(16)-C(17)   | 117.3(2)   | H(30A)-C(30)-H(30B) | 109.5    |
| C(23)-C(16)-B(1)    | 121.2(2)   | C(29)-C(30)-H(30C)  | 109.5    |
| C(17)-C(16)-B(1)    | 121.4(2)   | H(30A)-C(30)-H(30C) | 109.5    |
| C(19)-C(17)-C(16)   | 120.3(2)   | H(30B)-C(30)-H(30C) | 109.5    |
| C(19)-C(17)-C(18)   | 118.6(2)   | C(29)-C(31)-C(32)   | 121.9(3) |
| C(16)-C(17)-C(18)   | 121.1(2)   | C(29)-C(31)-H(31)   | 119.1    |
| C(17)-C(18)-H(18A)  | 109.5      | C(32)-C(31)-H(31)   | 119.1    |
| C(17)-C(18)-H(18B)  | 109.5      | C(31)-C(32)-C(25)   | 120.2(2) |
| H(18A)-C(18)-H(18B) | 109.5      | C(31)-C(32)-C(33)   | 118.5(2) |
| C(17)-C(18)-H(18C)  | 109.5      | C(25)-C(32)-C(33)   | 121.2(2) |
| H(18A)-C(18)-H(18C) | 109.5      | C(32)-C(33)-H(33A)  | 109.5    |
| H(18B)-C(18)-H(18C) | 109.5      | C(32)-C(33)-H(33B)  | 109.5    |
| C(20)-C(19)-C(17)   | 122.3(2)   | H(33A)-C(33)-H(33B) | 109.5    |
| C(20)-C(19)-H(19)   | 118.8      | C(32)-C(33)-H(33C)  | 109.5    |
| C(17)-C(19)-H(19)   | 118.8      | H(33A)-C(33)-H(33C) | 109.5    |

|                     |          |                   |          |
|---------------------|----------|-------------------|----------|
| H(33B)-C(33)-H(33C) | 109.5    | C(41)-C(40)-C(45) | 119.7(4) |
| C(35)-C(34)-C(39)   | 120.1(3) | C(41)-C(40)-H(40) | 120.2    |
| C(35)-C(34)-H(34)   | 120.0    | C(45)-C(40)-H(40) | 120.2    |
| C(39)-C(34)-H(34)   | 120.0    | C(42)-C(41)-C(40) | 119.1(5) |
| C(34)-C(35)-C(36)   | 120.5(3) | C(42)-C(41)-H(41) | 120.4    |
| C(34)-C(35)-H(35)   | 119.7    | C(40)-C(41)-H(41) | 120.4    |
| C(36)-C(35)-H(35)   | 119.7    | C(43)-C(42)-C(41) | 121.5(5) |
| C(37)-C(36)-C(35)   | 119.6(3) | C(43)-C(42)-H(42) | 119.2    |
| C(37)-C(36)-H(36)   | 120.2    | C(41)-C(42)-H(42) | 119.2    |
| C(35)-C(36)-H(36)   | 120.2    | C(42)-C(43)-C(44) | 120.5(4) |
| C(36)-C(37)-C(38)   | 120.6(3) | C(42)-C(43)-H(43) | 119.8    |
| C(36)-C(37)-H(37)   | 119.7    | C(44)-C(43)-H(43) | 119.8    |
| C(38)-C(37)-H(37)   | 119.7    | C(43)-C(44)-C(45) | 119.0(4) |
| C(37)-C(38)-C(39)   | 119.5(3) | C(43)-C(44)-H(44) | 120.5    |
| C(37)-C(38)-H(38)   | 120.2    | C(45)-C(44)-H(44) | 120.5    |
| C(39)-C(38)-H(38)   | 120.2    | C(44)-C(45)-C(40) | 120.2(4) |
| C(34)-C(39)-C(38)   | 119.7(3) | C(44)-C(45)-H(45) | 119.9    |
| C(34)-C(39)-H(39)   | 120.2    | C(40)-C(45)-H(45) | 119.9    |
| C(38)-C(39)-H(39)   | 120.2    |                   |          |

**Table S105.** Anisotropic displacement parameters ( $\text{\AA}^2 \times 10^3$ ) for **1c**. The anisotropic displacement factor exponent takes the form:  $-2\pi^2 [h^2 a^{*2} U^{11} + \dots + 2 h k a^* b^* U^{12}]$

|       | U <sup>11</sup> | U <sup>22</sup> | U <sup>33</sup> | U <sup>23</sup> | U <sup>13</sup> | U <sup>12</sup> |
|-------|-----------------|-----------------|-----------------|-----------------|-----------------|-----------------|
| N(1)  | 50(2)           | 34(1)           | 68(2)           | 20(1)           | 38(2)           | 22(1)           |
| C(1)  | 25(1)           | 21(1)           | 25(1)           | 6(1)            | 8(1)            | 12(1)           |
| B(1)  | 23(1)           | 21(1)           | 29(2)           | 6(1)            | 11(1)           | 8(1)            |
| C(2)  | 31(1)           | 26(1)           | 27(1)           | 6(1)            | 11(1)           | 15(1)           |
| N(2)  | 47(1)           | 26(1)           | 39(1)           | 18(1)           | 20(1)           | 22(1)           |
| C(3)  | 41(2)           | 29(1)           | 28(1)           | 14(1)           | 16(1)           | 21(1)           |
| C(4)  | 28(1)           | 24(1)           | 35(1)           | 12(1)           | 14(1)           | 14(1)           |
| C(5)  | 30(1)           | 20(1)           | 28(1)           | 6(1)            | 11(1)           | 12(1)           |
| C(8)  | 53(2)           | 28(1)           | 34(2)           | 14(1)           | 25(1)           | 21(1)           |
| C(7)  | 42(2)           | 22(1)           | 25(1)           | 4(1)            | 7(1)            | 16(1)           |
| C(6)  | 28(1)           | 19(1)           | 26(1)           | 6(1)            | 9(1)            | 12(1)           |
| C(9)  | 43(2)           | 24(1)           | 46(2)           | 11(1)           | 27(1)           | 18(1)           |
| C(10) | 35(1)           | 23(1)           | 37(2)           | 9(1)            | 20(1)           | 16(1)           |
| C(11) | 38(2)           | 35(2)           | 51(2)           | 17(1)           | 20(2)           | 22(1)           |
| C(12) | 36(2)           | 44(2)           | 75(2)           | 18(2)           | 21(2)           | 24(1)           |
| C(13) | 44(2)           | 40(2)           | 87(3)           | 20(2)           | 39(2)           | 20(2)           |
| C(14) | 64(2)           | 28(1)           | 67(2)           | 21(1)           | 36(2)           | 30(2)           |
| C(15) | 84(2)           | 33(2)           | 47(2)           | 22(1)           | 25(2)           | 32(2)           |
| C(16) | 29(1)           | 20(1)           | 30(1)           | 5(1)            | 9(1)            | 16(1)           |
| C(17) | 32(1)           | 18(1)           | 30(1)           | 5(1)            | 12(1)           | 12(1)           |
| C(18) | 36(2)           | 26(1)           | 35(1)           | 11(1)           | 12(1)           | 10(1)           |
| C(19) | 44(2)           | 26(1)           | 35(2)           | 12(1)           | 14(1)           | 18(1)           |
| C(20) | 43(2)           | 34(1)           | 38(2)           | 12(1)           | 5(1)            | 22(1)           |
| C(21) | 56(2)           | 64(2)           | 58(2)           | 25(2)           | -1(2)           | 26(2)           |
| C(22) | 26(1)           | 30(1)           | 44(2)           | 7(1)            | 2(1)            | 12(1)           |
| C(23) | 28(1)           | 20(1)           | 39(2)           | 8(1)            | 11(1)           | 12(1)           |
| C(24) | 27(1)           | 30(1)           | 53(2)           | 14(1)           | 13(1)           | 10(1)           |
| C(25) | 39(2)           | 19(1)           | 28(1)           | 9(1)            | 11(1)           | 16(1)           |
| C(26) | 35(2)           | 24(1)           | 31(1)           | 8(1)            | 5(1)            | 13(1)           |

|       |        |        |       |       |       |       |
|-------|--------|--------|-------|-------|-------|-------|
| C(27) | 36(2)  | 42(2)  | 50(2) | 6(1)  | 10(2) | 19(1) |
| C(28) | 41(2)  | 29(1)  | 32(2) | 6(1)  | 0(1)  | 9(1)  |
| C(29) | 63(2)  | 22(1)  | 26(1) | 7(1)  | 8(2)  | 14(1) |
| C(30) | 95(3)  | 37(2)  | 35(2) | 1(1)  | 11(2) | 17(2) |
| C(31) | 66(2)  | 26(1)  | 30(1) | 12(1) | 21(2) | 27(1) |
| C(32) | 47(2)  | 22(1)  | 31(1) | 11(1) | 15(1) | 21(1) |
| C(33) | 53(2)  | 44(2)  | 43(2) | 8(1)  | 20(2) | 31(2) |
| C(34) | 45(2)  | 46(2)  | 67(2) | 16(2) | 5(2)  | 7(2)  |
| C(35) | 53(2)  | 65(2)  | 63(2) | 20(2) | 25(2) | 27(2) |
| C(36) | 61(2)  | 47(2)  | 54(2) | 7(2)  | 13(2) | 23(2) |
| C(37) | 49(2)  | 46(2)  | 71(2) | 25(2) | 18(2) | 14(2) |
| C(38) | 78(3)  | 68(2)  | 58(2) | 32(2) | 36(2) | 40(2) |
| C(39) | 89(3)  | 45(2)  | 46(2) | 9(2)  | 7(2)  | 31(2) |
| C(40) | 66(3)  | 141(4) | 70(3) | 58(3) | 31(2) | 69(3) |
| C(41) | 106(4) | 96(3)  | 73(3) | 20(3) | 32(3) | 63(3) |
| C(42) | 92(3)  | 101(4) | 62(3) | -4(3) | 13(3) | 38(3) |
| C(43) | 71(3)  | 147(5) | 60(3) | 36(3) | 14(2) | 69(3) |
| C(44) | 86(3)  | 100(3) | 98(3) | 56(3) | 50(3) | 63(3) |
| C(45) | 56(2)  | 93(3)  | 87(3) | 23(3) | 27(2) | 18(2) |

**Table S106.** Hydrogen coordinates ( $\times 10^4$ ) and isotropic displacement parameters ( $\text{\AA}^2 \times 10^3$ ) for **1c**.

|        | x    | y     | z    | U(eq) |
|--------|------|-------|------|-------|
| H(2)   | 3900 | 2120  | 8184 | 33    |
| H(3)   | 3518 | 59    | 8358 | 35    |
| H(5)   | 3239 | -809  | 5808 | 31    |
| H(8)   | 4272 | 1728  | 4527 | 42    |
| H(7)   | 2301 | 1220  | 4809 | 36    |
| H(6)   | 1889 | 147   | 5938 | 29    |
| H(11)  | 6161 | 332   | 7461 | 46    |
| H(12)  | 8352 | 1592  | 7411 | 59    |
| H(13)  | 8558 | 2677  | 6284 | 63    |
| H(14A) | 3495 | -2240 | 6019 | 69    |
| H(14B) | 3218 | -3313 | 6591 | 69    |
| H(14C) | 4731 | -2185 | 6825 | 69    |
| H(15A) | 2687 | -2002 | 8202 | 77    |
| H(15B) | 4305 | -1521 | 8537 | 77    |
| H(15C) | 3284 | -2948 | 7986 | 77    |
| H(18A) | 5106 | 4737  | 5880 | 51    |
| H(18B) | 4911 | 5606  | 6590 | 51    |
| H(18C) | 4877 | 5929  | 5632 | 51    |
| H(19)  | 2785 | 5345  | 4614 | 40    |
| H(21A) | 717  | 4729  | 3388 | 96    |
| H(21B) | -294 | 4716  | 3910 | 96    |
| H(21C) | -610 | 3436  | 3280 | 96    |
| H(22)  | -636 | 2396  | 4590 | 43    |
| H(24A) | -682 | 1309  | 5740 | 56    |
| H(24B) | 683  | 1662  | 6558 | 56    |
| H(24C) | 325  | 732   | 5646 | 56    |
| H(27A) | 5824 | 3650  | 7030 | 65    |
| H(27B) | 6840 | 3777  | 7991 | 65    |
| H(27C) | 7174 | 4962  | 7520 | 65    |

|        |       |       |       |     |
|--------|-------|-------|-------|-----|
| H(28)  | 7365  | 5957  | 9043  | 48  |
| H(30A) | 7599  | 7538  | 10161 | 95  |
| H(30B) | 6483  | 6837  | 10613 | 95  |
| H(30C) | 6338  | 7851  | 10040 | 95  |
| H(31)  | 3944  | 5946  | 9233  | 44  |
| H(33A) | 1750  | 4282  | 7218  | 64  |
| H(33B) | 1833  | 4681  | 8220  | 64  |
| H(33C) | 1641  | 3298  | 7860  | 64  |
| H(34)  | 6770  | 7458  | 7564  | 73  |
| H(35)  | 7684  | 9134  | 8764  | 70  |
| H(36)  | 9835  | 10817 | 9049  | 68  |
| H(37)  | 11080 | 10792 | 8141  | 70  |
| H(38)  | 10175 | 9115  | 6926  | 74  |
| H(39)  | 8006  | 7435  | 6636  | 77  |
| H(40)  | 9902  | 7494  | 8761  | 96  |
| H(41)  | 11781 | 9387  | 9595  | 102 |
| H(42)  | 13606 | 9335  | 10622 | 110 |
| H(43)  | 13627 | 7452  | 10806 | 105 |
| H(44)  | 11793 | 5552  | 9971  | 97  |
| H(45)  | 9924  | 5571  | 8932  | 101 |

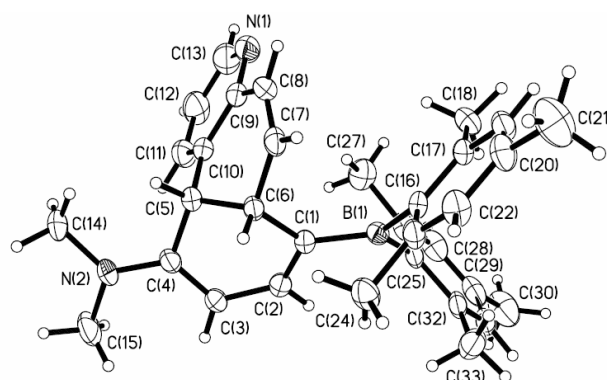

**Figure S158.** Structure of **1c**.

**Table S107.** Crystal data and structure refinement for **2c**.

|                                 |                                                                         |                                                                                          |
|---------------------------------|-------------------------------------------------------------------------|------------------------------------------------------------------------------------------|
| Identification code             | <b>2c</b>                                                               |                                                                                          |
| Empirical formula               | C <sub>2.43</sub> H <sub>2.79</sub> B <sub>0.07</sub> N <sub>0.14</sub> |                                                                                          |
| Formula weight                  | 34.75                                                                   |                                                                                          |
| Temperature                     | 180(2) K                                                                |                                                                                          |
| Wavelength                      | 0.71073 Å                                                               |                                                                                          |
| Crystal system                  | Triclinic                                                               |                                                                                          |
| Space group                     | P-1                                                                     |                                                                                          |
| Unit cell dimensions            | a = 10.294(3) Å<br>b = 11.896(4) Å<br>c = 13.128(5) Å                   | $\alpha = 66.239(11)^\circ$<br>$\beta = 88.621(11)^\circ$<br>$\gamma = 75.243(12)^\circ$ |
| Volume                          | 1417.2(8) Å <sup>3</sup>                                                |                                                                                          |
| Z                               | 28                                                                      |                                                                                          |
| Density (calculated)            | 1.140 Mg/m <sup>3</sup>                                                 |                                                                                          |
| Absorption coefficient          | 0.065 mm <sup>-1</sup>                                                  |                                                                                          |
| F(000)                          | 524                                                                     |                                                                                          |
| Crystal size                    | 0.180 x 0.174 x 0.095 mm <sup>3</sup>                                   |                                                                                          |
| Theta range for data collection | 2.419 to 27.261°                                                        |                                                                                          |



|                                   |                                             |
|-----------------------------------|---------------------------------------------|
| Index ranges                      | -13<=h<=13, -15<=k<=15, -16<=l<=16          |
| Reflections collected             | 19796                                       |
| Independent reflections           | 6268 [R(int) = 0.0885]                      |
| Completeness to theta = 25.242°   | 99.9 %                                      |
| Absorption correction             | Semi-empirical from equivalents             |
| Max. and min. transmission        | 0.994 and 0.988                             |
| Refinement method                 | Full-matrix least-squares on F <sup>2</sup> |
| Data / restraints / parameters    | 6268 / 0 / 344                              |
| Goodness-of-fit on F <sup>2</sup> | 1.036                                       |
| Final R indices [I>2sigma(I)]     | R1 = 0.0671, wR2 = 0.1647                   |
| R indices (all data)              | R1 = 0.1333, wR2 = 0.2045                   |
| Extinction coefficient            | 0.089(7)                                    |
| Largest diff. peak and hole       | 0.484 and -0.433 e.Å <sup>-3</sup>          |

**Table S108.** Atomic coordinates ( $\times 10^4$ ) and equivalent isotropic displacement parameters ( $\text{\AA}^2 \times 10^3$ ) for **2c**.  $U(\text{eq})$  is defined as one third of the trace of the orthogonalized  $U_{ij}$  tensor.

|       | x        | y       | z        | $U(\text{eq})$ |
|-------|----------|---------|----------|----------------|
| N(1)  | 949(2)   | 6561(2) | 4156(2)  | 43(1)          |
| N(2)  | 3366(2)  | 1705(2) | 7652(2)  | 52(1)          |
| C(1)  | 2795(2)  | 5377(2) | 7667(2)  | 33(1)          |
| C(2)  | 4034(2)  | 4541(2) | 7810(2)  | 36(1)          |
| C(3)  | 4254(2)  | 3263(2) | 7915(2)  | 40(1)          |
| C(4)  | 3242(2)  | 2905(2) | 7575(2)  | 38(1)          |
| C(5)  | 1941(2)  | 3926(2) | 7038(2)  | 35(1)          |
| C(6)  | 1600(2)  | 4853(2) | 7617(2)  | 36(1)          |
| C(7)  | 320(2)   | 5870(2) | 7020(2)  | 42(1)          |
| C(8)  | 62(2)    | 6305(2) | 5926(2)  | 44(1)          |
| C(9)  | 1025(2)  | 5826(2) | 5256(2)  | 37(1)          |
| C(10) | 2001(2)  | 4675(2) | 5793(2)  | 35(1)          |
| C(11) | 2950(2)  | 4274(2) | 5159(2)  | 43(1)          |
| C(12) | 2888(3)  | 5031(2) | 4030(2)  | 48(1)          |
| C(13) | 1891(3)  | 6157(2) | 3554(2)  | 47(1)          |
| C(14) | 1798(3)  | 7027(3) | 2340(2)  | 68(1)          |
| C(15) | 2427(3)  | 1346(2) | 7125(2)  | 55(1)          |
| C(16) | 4616(3)  | 730(3)  | 8192(3)  | 78(1)          |
| C(17) | 3928(2)  | 7257(2) | 7342(2)  | 34(1)          |
| C(18) | 4268(2)  | 7617(2) | 6229(2)  | 36(1)          |
| C(19) | 3495(3)  | 7435(2) | 5361(2)  | 46(1)          |
| C(20) | 5327(2)  | 8176(2) | 5890(2)  | 41(1)          |
| C(21) | 6137(2)  | 8328(2) | 6627(2)  | 44(1)          |
| C(22) | 7283(3)  | 8930(3) | 6246(3)  | 59(1)          |
| C(23) | 5843(2)  | 7922(2) | 7732(2)  | 43(1)          |
| C(24) | 4748(2)  | 7432(2) | 8092(2)  | 38(1)          |
| C(25) | 4462(3)  | 7075(3) | 9305(2)  | 55(1)          |
| C(26) | 1480(2)  | 7319(2) | 8241(2)  | 35(1)          |
| C(27) | 719(2)   | 8593(2) | 7640(2)  | 37(1)          |
| C(28) | 920(3)   | 9329(2) | 6435(2)  | 46(1)          |
| C(29) | -282(2)  | 9191(2) | 8124(2)  | 46(1)          |
| C(30) | -598(3)  | 8562(3) | 9206(2)  | 52(1)          |
| C(31) | -1671(3) | 9227(3) | 9728(3)  | 83(1)          |
| C(32) | 129(3)   | 7308(3) | 9781(2)  | 50(1)          |
| C(33) | 1144(2)  | 6672(2) | 9337(2)  | 42(1)          |
| C(34) | 1883(3)  | 5313(2) | 10084(2) | 56(1)          |
| B(1)  | 2706(3)  | 6646(2) | 7740(2)  | 34(1)          |

**Table S109.** Bond lengths [ $\text{\AA}$ ] and angles [ $^\circ$ ] for **2c**.

|            |          |            |          |
|------------|----------|------------|----------|
| N(1)-C(9)  | 1.345(3) |            |          |
| N(1)-C(13) | 1.352(3) | C(2)-H(2)  | 0.9500   |
| N(2)-C(4)  | 1.362(3) | C(3)-C(4)  | 1.366(3) |
| N(2)-C(15) | 1.442(3) | C(3)-H(3)  | 0.9500   |
| N(2)-C(16) | 1.458(3) | C(4)-C(5)  | 1.514(3) |
| C(1)-C(2)  | 1.366(3) | C(5)-C(10) | 1.524(3) |
| C(1)-C(6)  | 1.528(3) | C(5)-C(6)  | 1.543(3) |
| C(1)-B(1)  | 1.530(3) | C(5)-H(5)  | 1.0000   |
| C(2)-C(3)  | 1.427(3) | C(6)-C(7)  | 1.513(3) |

|              |          |                   |            |
|--------------|----------|-------------------|------------|
| C(6)-H(6)    | 1.0000   | C(31)-H(31C)      | 0.9800     |
| C(7)-C(8)    | 1.322(3) | C(32)-C(33)       | 1.389(3)   |
| C(7)-H(7)    | 0.9500   | C(32)-H(32)       | 0.9500     |
| C(8)-C(9)    | 1.468(3) | C(33)-C(34)       | 1.512(3)   |
| C(8)-H(8)    | 0.9500   | C(34)-H(34A)      | 0.9800     |
| C(9)-C(10)   | 1.391(3) | C(34)-H(34B)      | 0.9800     |
| C(10)-C(11)  | 1.385(3) | C(34)-H(34C)      | 0.9800     |
| C(11)-C(12)  | 1.382(3) | C(9)-N(1)-C(13)   | 117.5(2)   |
| C(11)-H(11)  | 0.9500   | C(4)-N(2)-C(15)   | 125.2(2)   |
| C(12)-C(13)  | 1.376(3) | C(4)-N(2)-C(16)   | 118.1(2)   |
| C(12)-H(12)  | 0.9500   | C(15)-N(2)-C(16)  | 116.3(2)   |
| C(13)-C(14)  | 1.499(3) | C(2)-C(1)-C(6)    | 114.91(18) |
| C(14)-H(14A) | 0.9800   | C(2)-C(1)-B(1)    | 118.90(19) |
| C(14)-H(14B) | 0.9800   | C(6)-C(1)-B(1)    | 125.55(19) |
| C(14)-H(14C) | 0.9800   | C(1)-C(2)-C(3)    | 124.7(2)   |
| C(15)-H(15A) | 0.9800   | C(1)-C(2)-H(2)    | 117.6      |
| C(15)-H(15B) | 0.9800   | C(3)-C(2)-H(2)    | 117.6      |
| C(15)-H(15C) | 0.9800   | C(4)-C(3)-C(2)    | 119.9(2)   |
| C(16)-H(16A) | 0.9800   | C(4)-C(3)-H(3)    | 120.0      |
| C(16)-H(16B) | 0.9800   | C(2)-C(3)-H(3)    | 120.0      |
| C(16)-H(16C) | 0.9800   | N(2)-C(4)-C(3)    | 123.6(2)   |
| C(17)-C(18)  | 1.410(3) | N(2)-C(4)-C(5)    | 119.0(2)   |
| C(17)-C(24)  | 1.422(3) | C(3)-C(4)-C(5)    | 117.32(19) |
| C(17)-B(1)   | 1.585(3) | C(4)-C(5)-C(10)   | 112.05(17) |
| C(18)-C(20)  | 1.392(3) | C(4)-C(5)-C(6)    | 110.80(18) |
| C(18)-C(19)  | 1.520(3) | C(10)-C(5)-C(6)   | 109.41(17) |
| C(19)-H(19A) | 0.9800   | C(4)-C(5)-H(5)    | 108.2      |
| C(19)-H(19B) | 0.9800   | C(10)-C(5)-H(5)   | 108.2      |
| C(19)-H(19C) | 0.9800   | C(6)-C(5)-H(5)    | 108.2      |
| C(20)-C(21)  | 1.386(3) | C(7)-C(6)-C(1)    | 113.94(17) |
| C(20)-H(20)  | 0.9500   | C(7)-C(6)-C(5)    | 108.21(18) |
| C(21)-C(23)  | 1.385(3) | C(1)-C(6)-C(5)    | 110.82(17) |
| C(21)-C(22)  | 1.506(3) | C(7)-C(6)-H(6)    | 107.9      |
| C(22)-H(22A) | 0.9800   | C(1)-C(6)-H(6)    | 107.9      |
| C(22)-H(22B) | 0.9800   | C(5)-C(6)-H(6)    | 107.9      |
| C(22)-H(22C) | 0.9800   | C(8)-C(7)-C(6)    | 121.1(2)   |
| C(23)-C(24)  | 1.386(3) | C(8)-C(7)-H(7)    | 119.5      |
| C(23)-H(23)  | 0.9500   | C(6)-C(7)-H(7)    | 119.5      |
| C(24)-C(25)  | 1.516(3) | C(7)-C(8)-C(9)    | 120.7(2)   |
| C(25)-H(25A) | 0.9800   | C(7)-C(8)-H(8)    | 119.6      |
| C(25)-H(25B) | 0.9800   | C(9)-C(8)-H(8)    | 119.6      |
| C(25)-H(25C) | 0.9800   | N(1)-C(9)-C(10)   | 123.5(2)   |
| C(26)-C(27)  | 1.412(3) | N(1)-C(9)-C(8)    | 117.6(2)   |
| C(26)-C(33)  | 1.414(3) | C(10)-C(9)-C(8)   | 118.8(2)   |
| C(26)-B(1)   | 1.592(3) | C(11)-C(10)-C(9)  | 118.0(2)   |
| C(27)-C(29)  | 1.390(3) | C(11)-C(10)-C(5)  | 124.2(2)   |
| C(27)-C(28)  | 1.507(3) | C(9)-C(10)-C(5)   | 117.78(19) |
| C(28)-H(28A) | 0.9800   | C(12)-C(11)-C(10) | 118.8(2)   |
| C(28)-H(28B) | 0.9800   | C(12)-C(11)-H(11) | 120.6      |
| C(28)-H(28C) | 0.9800   | C(10)-C(11)-H(11) | 120.6      |
| C(29)-C(30)  | 1.388(3) | C(13)-C(12)-C(11) | 120.1(2)   |
| C(29)-H(29)  | 0.9500   | C(13)-C(12)-H(12) | 120.0      |
| C(30)-C(32)  | 1.381(4) | C(11)-C(12)-H(12) | 120.0      |
| C(30)-C(31)  | 1.507(4) | N(1)-C(13)-C(12)  | 122.1(2)   |
| C(31)-H(31A) | 0.9800   | N(1)-C(13)-C(14)  | 115.8(2)   |
| C(31)-H(31B) | 0.9800   | C(12)-C(13)-C(14) | 122.2(2)   |

|                     |            |                     |            |
|---------------------|------------|---------------------|------------|
| C(13)-C(14)-H(14A)  | 109.5      | C(17)-C(24)-C(25)   | 121.1(2)   |
| C(13)-C(14)-H(14B)  | 109.5      | C(24)-C(25)-H(25A)  | 109.5      |
| H(14A)-C(14)-H(14B) | 109.5      | C(24)-C(25)-H(25B)  | 109.5      |
| C(13)-C(14)-H(14C)  | 109.5      | H(25A)-C(25)-H(25B) | 109.5      |
| H(14A)-C(14)-H(14C) | 109.5      | C(24)-C(25)-H(25C)  | 109.5      |
| H(14B)-C(14)-H(14C) | 109.5      | H(25A)-C(25)-H(25C) | 109.5      |
| N(2)-C(15)-H(15A)   | 109.5      | H(25B)-C(25)-H(25C) | 109.5      |
| N(2)-C(15)-H(15B)   | 109.5      | C(27)-C(26)-C(33)   | 117.1(2)   |
| H(15A)-C(15)-H(15B) | 109.5      | C(27)-C(26)-B(1)    | 122.04(18) |
| N(2)-C(15)-H(15C)   | 109.5      | C(33)-C(26)-B(1)    | 120.9(2)   |
| H(15A)-C(15)-H(15C) | 109.5      | C(29)-C(27)-C(26)   | 121.1(2)   |
| H(15B)-C(15)-H(15C) | 109.5      | C(29)-C(27)-C(28)   | 117.7(2)   |
| N(2)-C(16)-H(16A)   | 109.5      | C(26)-C(27)-C(28)   | 121.2(2)   |
| N(2)-C(16)-H(16B)   | 109.5      | C(27)-C(28)-H(28A)  | 109.5      |
| H(16A)-C(16)-H(16B) | 109.5      | C(27)-C(28)-H(28B)  | 109.5      |
| N(2)-C(16)-H(16C)   | 109.5      | H(28A)-C(28)-H(28B) | 109.5      |
| H(16A)-C(16)-H(16C) | 109.5      | C(27)-C(28)-H(28C)  | 109.5      |
| H(16B)-C(16)-H(16C) | 109.5      | H(28A)-C(28)-H(28C) | 109.5      |
| C(18)-C(17)-C(24)   | 117.23(19) | H(28B)-C(28)-H(28C) | 109.5      |
| C(18)-C(17)-B(1)    | 120.98(19) | C(30)-C(29)-C(27)   | 121.9(2)   |
| C(24)-C(17)-B(1)    | 121.77(19) | C(30)-C(29)-H(29)   | 119.1      |
| C(20)-C(18)-C(17)   | 120.1(2)   | C(27)-C(29)-H(29)   | 119.1      |
| C(20)-C(18)-C(19)   | 117.8(2)   | C(32)-C(30)-C(29)   | 116.8(2)   |
| C(17)-C(18)-C(19)   | 122.07(19) | C(32)-C(30)-C(31)   | 121.8(2)   |
| C(18)-C(19)-H(19A)  | 109.5      | C(29)-C(30)-C(31)   | 121.4(3)   |
| C(18)-C(19)-H(19B)  | 109.5      | C(30)-C(31)-H(31A)  | 109.5      |
| H(19A)-C(19)-H(19B) | 109.5      | C(30)-C(31)-H(31B)  | 109.5      |
| C(18)-C(19)-H(19C)  | 109.5      | H(31A)-C(31)-H(31B) | 109.5      |
| H(19A)-C(19)-H(19C) | 109.5      | C(30)-C(31)-H(31C)  | 109.5      |
| H(19B)-C(19)-H(19C) | 109.5      | H(31A)-C(31)-H(31C) | 109.5      |
| C(21)-C(20)-C(18)   | 122.4(2)   | H(31B)-C(31)-H(31C) | 109.5      |
| C(21)-C(20)-H(20)   | 118.8      | C(30)-C(32)-C(33)   | 123.5(2)   |
| C(18)-C(20)-H(20)   | 118.8      | C(30)-C(32)-H(32)   | 118.3      |
| C(23)-C(21)-C(20)   | 117.5(2)   | C(33)-C(32)-H(32)   | 118.3      |
| C(23)-C(21)-C(22)   | 120.8(2)   | C(32)-C(33)-C(26)   | 119.7(2)   |
| C(20)-C(21)-C(22)   | 121.7(2)   | C(32)-C(33)-C(34)   | 117.3(2)   |
| C(21)-C(22)-H(22A)  | 109.5      | C(26)-C(33)-C(34)   | 122.9(2)   |
| C(21)-C(22)-H(22B)  | 109.5      | C(33)-C(34)-H(34A)  | 109.5      |
| H(22A)-C(22)-H(22B) | 109.5      | C(33)-C(34)-H(34B)  | 109.5      |
| C(21)-C(22)-H(22C)  | 109.5      | H(34A)-C(34)-H(34B) | 109.5      |
| H(22A)-C(22)-H(22C) | 109.5      | C(33)-C(34)-H(34C)  | 109.5      |
| H(22B)-C(22)-H(22C) | 109.5      | H(34A)-C(34)-H(34C) | 109.5      |
| C(21)-C(23)-C(24)   | 122.0(2)   | H(34B)-C(34)-H(34C) | 109.5      |
| C(21)-C(23)-H(23)   | 119.0      | C(1)-B(1)-C(17)     | 117.3(2)   |
| C(24)-C(23)-H(23)   | 119.0      | C(1)-B(1)-C(26)     | 122.5(2)   |
| C(23)-C(24)-C(17)   | 120.6(2)   | C(17)-B(1)-C(26)    | 120.12(19) |
| C(23)-C(24)-C(25)   | 118.3(2)   |                     |            |

**Table S110.** Anisotropic displacement parameters ( $\text{\AA}^2 \times 10^3$ ) for **2c**. The anisotropic displacement factor exponent takes the form:  $-2\pi^2 [ h^2 a^{*2} U^{11} + \dots + 2 h k a^* b^* U^{12} ]$

|      | U <sup>11</sup> | U <sup>22</sup> | U <sup>33</sup> | U <sup>23</sup> | U <sup>13</sup> | U <sup>12</sup> |
|------|-----------------|-----------------|-----------------|-----------------|-----------------|-----------------|
| N(1) | 44(1)           | 44(1)           | 42(1)           | -19(1)          | -4(1)           | -11(1)          |

|       |       |       |        |        |        |        |
|-------|-------|-------|--------|--------|--------|--------|
| N(2)  | 63(1) | 33(1) | 63(1)  | -23(1) | -5(1)  | -9(1)  |
| C(1)  | 41(1) | 35(1) | 27(1)  | -13(1) | 6(1)   | -16(1) |
| C(2)  | 41(1) | 36(1) | 34(1)  | -14(1) | 3(1)   | -14(1) |
| C(3)  | 40(1) | 36(1) | 44(1)  | -18(1) | -2(1)  | -7(1)  |
| C(4)  | 48(1) | 31(1) | 36(1)  | -15(1) | 6(1)   | -11(1) |
| C(5)  | 38(1) | 37(1) | 38(1)  | -18(1) | 6(1)   | -16(1) |
| C(6)  | 40(1) | 36(1) | 35(1)  | -17(1) | 8(1)   | -14(1) |
| C(7)  | 36(1) | 46(1) | 54(2)  | -29(1) | 10(1)  | -13(1) |
| C(8)  | 34(1) | 46(1) | 54(2)  | -25(1) | -2(1)  | -6(1)  |
| C(9)  | 35(1) | 39(1) | 42(1)  | -22(1) | -3(1)  | -10(1) |
| C(10) | 36(1) | 37(1) | 40(1)  | -21(1) | 0(1)   | -12(1) |
| C(11) | 45(1) | 42(1) | 44(1)  | -22(1) | 4(1)   | -10(1) |
| C(12) | 49(2) | 54(2) | 44(1)  | -25(1) | 10(1)  | -11(1) |
| C(13) | 51(2) | 54(2) | 41(1)  | -22(1) | 1(1)   | -19(1) |
| C(14) | 75(2) | 73(2) | 42(2)  | -13(1) | 0(1)   | -12(2) |
| C(15) | 73(2) | 46(2) | 60(2)  | -30(1) | 4(1)   | -24(1) |
| C(16) | 80(2) | 37(2) | 109(3) | -31(2) | -15(2) | 1(2)   |
| C(17) | 39(1) | 28(1) | 35(1)  | -15(1) | 2(1)   | -8(1)  |
| C(18) | 42(1) | 33(1) | 39(1)  | -19(1) | 6(1)   | -12(1) |
| C(19) | 60(2) | 54(2) | 38(1)  | -23(1) | 9(1)   | -27(1) |
| C(20) | 45(1) | 37(1) | 45(1)  | -20(1) | 11(1)  | -15(1) |
| C(21) | 38(1) | 34(1) | 65(2)  | -25(1) | 6(1)   | -9(1)  |
| C(22) | 44(2) | 54(2) | 86(2)  | -31(1) | 9(1)   | -21(1) |
| C(23) | 40(1) | 34(1) | 56(2)  | -22(1) | -9(1)  | -7(1)  |
| C(24) | 45(1) | 31(1) | 41(1)  | -17(1) | -4(1)  | -7(1)  |
| C(25) | 70(2) | 61(2) | 37(1)  | -19(1) | -7(1)  | -25(1) |
| C(26) | 43(1) | 37(1) | 32(1)  | -17(1) | 4(1)   | -16(1) |
| C(27) | 41(1) | 42(1) | 35(1)  | -19(1) | 3(1)   | -19(1) |
| C(28) | 56(2) | 41(1) | 36(1)  | -12(1) | 0(1)   | -10(1) |
| C(29) | 44(1) | 48(1) | 49(1)  | -24(1) | 4(1)   | -9(1)  |
| C(30) | 46(2) | 66(2) | 52(2)  | -31(1) | 12(1)  | -16(1) |
| C(31) | 71(2) | 99(3) | 76(2)  | -44(2) | 28(2)  | -4(2)  |
| C(32) | 60(2) | 61(2) | 37(1)  | -22(1) | 15(1)  | -27(1) |
| C(33) | 53(2) | 45(1) | 35(1)  | -20(1) | 8(1)   | -21(1) |
| C(34) | 84(2) | 48(2) | 33(1)  | -12(1) | 11(1)  | -20(1) |
| B(1)  | 46(2) | 32(1) | 23(1)  | -9(1)  | -3(1)  | -9(1)  |

**Table S111.** Hydrogen coordinates ( $\times 10^4$ ) and isotropic displacement parameters ( $\text{\AA}^2 \times 10^3$ ) for **2c**.

|        | x    | y    | z    | U(eq) |
|--------|------|------|------|-------|
| H(2)   | 4805 | 4830 | 7842 | 44    |
| H(3)   | 5102 | 2663 | 8221 | 48    |
| H(5)   | 1198 | 3499 | 7133 | 42    |
| H(6)   | 1414 | 4365 | 8401 | 43    |
| H(7)   | -309 | 6202 | 7437 | 50    |
| H(8)   | -754 | 6935 | 5570 | 53    |
| H(11)  | 3632 | 3493 | 5493 | 52    |
| H(12)  | 3535 | 4774 | 3583 | 58    |
| H(14A) | 2191 | 6527 | 1916 | 103   |
| H(14B) | 2293 | 7660 | 2246 | 103   |
| H(14C) | 850  | 7462 | 2065 | 103   |
| H(15A) | 1672 | 2091 | 6724 | 83    |

|        |       |       |       |     |
|--------|-------|-------|-------|-----|
| H(15B) | 2086  | 681   | 7695  | 83  |
| H(15C) | 2884  | 1020  | 6597  | 83  |
| H(16A) | 5349  | 904   | 7711  | 117 |
| H(16B) | 4507  | -109  | 8317  | 117 |
| H(16C) | 4834  | 741   | 8910  | 117 |
| H(19A) | 3667  | 7986  | 4611  | 70  |
| H(19B) | 2528  | 7659  | 5448  | 70  |
| H(19C) | 3793  | 6543  | 5462  | 70  |
| H(20)  | 5501  | 8465  | 5125  | 49  |
| H(22A) | 7348  | 9146  | 5447  | 89  |
| H(22B) | 8129  | 8330  | 6666  | 89  |
| H(22C) | 7118  | 9707  | 6379  | 89  |
| H(23)  | 6408  | 7982  | 8259  | 51  |
| H(25A) | 3586  | 7616  | 9346  | 82  |
| H(25B) | 5170  | 7197  | 9704  | 82  |
| H(25C) | 4445  | 6179  | 9650  | 82  |
| H(28A) | 629   | 8950  | 5973  | 69  |
| H(28B) | 1877  | 9300  | 6363  | 69  |
| H(28C) | 386   | 10218 | 6187  | 69  |
| H(29)  | -765  | 10054 | 7703  | 56  |
| H(31A) | -2362 | 9880  | 9145  | 125 |
| H(31B) | -1264 | 9629  | 10109 | 125 |
| H(31C) | -2087 | 8603  | 10270 | 125 |
| H(32)  | -77   | 6856  | 10520 | 60  |
| H(34A) | 2582  | 4978  | 9682  | 84  |
| H(34B) | 1244  | 4788  | 10299 | 84  |
| H(34C) | 2303  | 5292  | 10756 | 84  |

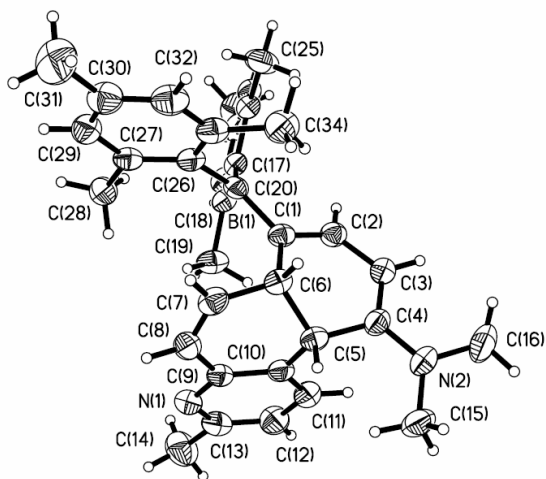

**Figure S159.** Structure of **2c**.

**Table S112.** Crystal data and structure refinement for **1d**.

|                      |                                                  |                  |
|----------------------|--------------------------------------------------|------------------|
| Identification code  | <b>1d</b>                                        |                  |
| Empirical formula    | C <sub>33</sub> H <sub>35</sub> B N <sub>2</sub> |                  |
| Formula weight       | 470.44                                           |                  |
| Temperature          | 180(2) K                                         |                  |
| Wavelength           | 0.71073 Å                                        |                  |
| Crystal system       | Monoclinic                                       |                  |
| Space group          | P2 <sub>1</sub> /c                               |                  |
| Unit cell dimensions | a = 22.112(6) Å                                  | α = 90°.         |
|                      | b = 8.318(2) Å                                   | β = 110.321(8)°. |

|                                        |                                                                    |                       |
|----------------------------------------|--------------------------------------------------------------------|-----------------------|
|                                        | $c = 15.429(4) \text{ \AA}$                                        | $\gamma = 90^\circ$ . |
| Volume                                 | $2661.1(13) \text{ \AA}^3$                                         |                       |
| Z                                      | 4                                                                  |                       |
| Density (calculated)                   | $1.174 \text{ Mg/m}^3$                                             |                       |
| Absorption coefficient                 | $0.067 \text{ mm}^{-1}$                                            |                       |
| F(000)                                 | 1008                                                               |                       |
| Crystal size                           | $0.220 \times 0.210 \times 0.160 \text{ mm}^3$                     |                       |
| Theta range for data collection        | $2.638$ to $27.202^\circ$ .                                        |                       |
| Index ranges                           | $-28 \leq h \leq 28$ , $-10 \leq k \leq 10$ , $-19 \leq l \leq 19$ |                       |
| Reflections collected                  | 30375                                                              |                       |
| Independent reflections                | 5916 [R(int) = 0.1436]                                             |                       |
| Completeness to theta = $25.242^\circ$ | 99.9 %                                                             |                       |
| Absorption correction                  | Semi-empirical from equivalents                                    |                       |
| Max. and min. transmission             | 0.989 and 0.985                                                    |                       |
| Refinement method                      | Full-matrix least-squares on $F^2$                                 |                       |
| Data / restraints / parameters         | 5916 / 0 / 334                                                     |                       |
| Goodness-of-fit on $F^2$               | 1.059                                                              |                       |
| Final R indices [ $I > 2\sigma(I)$ ]   | $R1 = 0.0973$ , $wR2 = 0.2120$                                     |                       |
| R indices (all data)                   | $R1 = 0.1778$ , $wR2 = 0.2474$                                     |                       |
| Extinction coefficient                 | $0.0055(13)$                                                       |                       |
| Largest diff. peak and hole            | $0.453$ and $-0.222 \text{ e.\AA}^{-3}$                            |                       |

**Table S113.** Atomic coordinates ( $\times 10^4$ ) and equivalent isotropic displacement parameters ( $\text{\AA}^2 \times 10^3$ ) for **1d**.  $U(\text{eq})$  is defined as one third of the trace of the orthogonalized  $U^{ij}$  tensor.

|       | x       | y        | z       | $U(\text{eq})$ |
|-------|---------|----------|---------|----------------|
| N(1)  | 400(2)  | -377(5)  | 1158(3) | 69(1)          |
| C(1)  | 2429(2) | 2103(4)  | 4173(3) | 42(1)          |
| B(1)  | 3019(2) | 2968(5)  | 4043(3) | 40(1)          |
| N(2)  | 936(2)  | -329(4)  | 4798(2) | 51(1)          |
| C(2)  | 2404(2) | 1990(5)  | 5068(3) | 45(1)          |
| C(3)  | 1914(2) | 1257(5)  | 5264(3) | 47(1)          |
| C(4)  | 1404(2) | 532(5)   | 4570(3) | 43(1)          |
| C(5)  | 1367(2) | 654(4)   | 3629(2) | 34(1)          |
| C(7)  | 1907(2) | 1427(4)  | 2526(3) | 42(1)          |
| C(6)  | 1896(2) | 1431(4)  | 3464(3) | 40(1)          |
| C(9)  | 875(2)  | 147(5)   | 1947(3) | 54(1)          |
| C(8)  | 1429(2) | 777(5)   | 1830(3) | 51(1)          |
| C(10) | 830(2)  | 118(4)   | 2823(3) | 42(1)          |
| C(11) | 211(2)  | -341(5)  | 2841(3) | 55(1)          |
| C(12) | -259(2) | -824(6)  | 2068(4) | 68(1)          |
| C(13) | -143(3) | -852(7)  | 1225(4) | 76(2)          |
| C(14) | 894(2)  | -9(7)    | 5717(3) | 70(2)          |
| C(15) | 934(2)  | -2075(5) | 4649(4) | 65(1)          |
| C(16) | 3688(2) | 2538(4)  | 4773(3) | 38(1)          |
| C(17) | 3872(2) | 892(4)   | 4980(3) | 45(1)          |
| C(18) | 3452(3) | -463(5)  | 4415(3) | 67(1)          |
| C(19) | 4443(2) | 504(5)   | 5661(3) | 51(1)          |
| C(20) | 4854(2) | 1649(5)  | 6199(3) | 51(1)          |
| C(21) | 5453(2) | 1200(7)  | 6986(4) | 80(2)          |
| C(22) | 4694(2) | 3252(5)  | 5991(3) | 45(1)          |
| C(23) | 4133(2) | 3695(4)  | 5291(3) | 41(1)          |

|       |         |         |         |       |
|-------|---------|---------|---------|-------|
| C(24) | 4013(2) | 5480(4) | 5098(3) | 51(1) |
| C(25) | 2946(2) | 4291(4) | 3278(2) | 36(1) |
| C(26) | 3333(2) | 4258(4) | 2713(3) | 40(1) |
| C(27) | 3792(2) | 2877(5) | 2758(3) | 61(1) |
| C(28) | 3286(2) | 5473(5) | 2083(3) | 46(1) |
| C(29) | 2875(2) | 6776(5) | 1985(3) | 45(1) |
| C(30) | 2846(3) | 8112(6) | 1319(3) | 73(2) |
| C(31) | 2496(2) | 6814(5) | 2529(3) | 44(1) |
| C(32) | 2516(2) | 5593(4) | 3153(3) | 39(1) |
| C(33) | 2080(2) | 5793(5) | 3717(3) | 56(1) |

**Table S114.** Bond lengths [Å] and angles [°] for **1d**.

|              |          |                  |          |
|--------------|----------|------------------|----------|
| N(1)-C(13)   | 1.302(7) | C(19)-C(20)      | 1.377(6) |
| N(1)-C(9)    | 1.374(5) | C(19)-H(19)      | 0.9500   |
| C(1)-C(2)    | 1.403(5) | C(20)-C(22)      | 1.389(6) |
| C(1)-C(6)    | 1.416(5) | C(20)-C(21)      | 1.501(6) |
| C(1)-B(1)    | 1.563(6) | C(21)-H(21A)     | 0.9800   |
| B(1)-C(16)   | 1.559(6) | C(21)-H(21B)     | 0.9800   |
| B(1)-C(25)   | 1.581(6) | C(21)-H(21C)     | 0.9800   |
| N(2)-C(4)    | 1.401(5) | C(22)-C(23)      | 1.382(6) |
| N(2)-C(15)   | 1.471(5) | C(22)-H(22)      | 0.9500   |
| N(2)-C(14)   | 1.476(5) | C(23)-C(24)      | 1.520(5) |
| C(2)-C(3)    | 1.366(5) | C(24)-H(24A)     | 0.9800   |
| C(2)-H(2)    | 0.9500   | C(24)-H(24B)     | 0.9800   |
| C(3)-C(4)    | 1.393(5) | C(24)-H(24C)     | 0.9800   |
| C(3)-H(3)    | 0.9500   | C(25)-C(32)      | 1.410(5) |
| C(4)-C(5)    | 1.430(5) | C(25)-C(26)      | 1.417(5) |
| C(5)-C(6)    | 1.434(5) | C(26)-C(28)      | 1.382(5) |
| C(5)-C(10)   | 1.459(5) | C(26)-C(27)      | 1.518(5) |
| C(7)-C(8)    | 1.333(5) | C(27)-H(27A)     | 0.9800   |
| C(7)-C(6)    | 1.456(5) | C(27)-H(27B)     | 0.9800   |
| C(7)-H(7)    | 0.9500   | C(27)-H(27C)     | 0.9800   |
| C(9)-C(10)   | 1.391(6) | C(28)-C(29)      | 1.388(6) |
| C(9)-C(8)    | 1.401(6) | C(28)-H(28)      | 0.9500   |
| C(8)-H(8)    | 0.9500   | C(29)-C(31)      | 1.377(6) |
| C(10)-C(11)  | 1.430(6) | C(29)-C(30)      | 1.500(6) |
| C(11)-C(12)  | 1.343(6) | C(30)-H(30A)     | 0.9800   |
| C(11)-H(11)  | 0.9500   | C(30)-H(30B)     | 0.9800   |
| C(12)-C(13)  | 1.409(7) | C(30)-H(30C)     | 0.9800   |
| C(12)-H(12)  | 0.9500   | C(31)-C(32)      | 1.389(5) |
| C(13)-H(13)  | 0.9500   | C(31)-H(31)      | 0.9500   |
| C(14)-H(14A) | 0.9800   | C(32)-C(33)      | 1.515(5) |
| C(14)-H(14B) | 0.9800   | C(33)-H(33A)     | 0.9800   |
| C(14)-H(14C) | 0.9800   | C(33)-H(33B)     | 0.9800   |
| C(15)-H(15A) | 0.9800   | C(33)-H(33C)     | 0.9800   |
| C(15)-H(15B) | 0.9800   | C(13)-N(1)-C(9)  | 117.9(4) |
| C(15)-H(15C) | 0.9800   | C(2)-C(1)-C(6)   | 115.3(4) |
| C(16)-C(23)  | 1.409(5) | C(2)-C(1)-B(1)   | 118.5(4) |
| C(16)-C(17)  | 1.432(5) | C(6)-C(1)-B(1)   | 126.2(4) |
| C(17)-C(19)  | 1.372(6) | C(16)-B(1)-C(1)  | 115.3(3) |
| C(17)-C(18)  | 1.526(6) | C(16)-B(1)-C(25) | 121.6(3) |
| C(18)-H(18A) | 0.9800   | C(1)-B(1)-C(25)  | 122.9(4) |
| C(18)-H(18B) | 0.9800   | C(4)-N(2)-C(15)  | 115.2(3) |
| C(18)-H(18C) | 0.9800   | C(4)-N(2)-C(14)  | 116.6(3) |



|                     |          |                     |          |
|---------------------|----------|---------------------|----------|
| C(15)-N(2)-C(14)    | 109.3(4) | C(17)-C(18)-H(18B)  | 109.5    |
| C(3)-C(2)-C(1)      | 123.6(4) | H(18A)-C(18)-H(18B) | 109.5    |
| C(3)-C(2)-H(2)      | 118.2    | C(17)-C(18)-H(18C)  | 109.5    |
| C(1)-C(2)-H(2)      | 118.2    | H(18A)-C(18)-H(18C) | 109.5    |
| C(2)-C(3)-C(4)      | 121.0(4) | H(18B)-C(18)-H(18C) | 109.5    |
| C(2)-C(3)-H(3)      | 119.5    | C(17)-C(19)-C(20)   | 122.6(4) |
| C(4)-C(3)-H(3)      | 119.5    | C(17)-C(19)-H(19)   | 118.7    |
| C(3)-C(4)-N(2)      | 120.0(4) | C(20)-C(19)-H(19)   | 118.7    |
| C(3)-C(4)-C(5)      | 119.7(4) | C(19)-C(20)-C(22)   | 117.6(4) |
| N(2)-C(4)-C(5)      | 120.3(4) | C(19)-C(20)-C(21)   | 121.9(4) |
| C(4)-C(5)-C(6)      | 116.7(3) | C(22)-C(20)-C(21)   | 120.6(4) |
| C(4)-C(5)-C(10)     | 125.9(3) | C(20)-C(21)-H(21A)  | 109.5    |
| C(6)-C(5)-C(10)     | 117.4(3) | C(20)-C(21)-H(21B)  | 109.5    |
| C(8)-C(7)-C(6)      | 121.3(4) | H(21A)-C(21)-H(21B) | 109.5    |
| C(8)-C(7)-H(7)      | 119.4    | C(20)-C(21)-H(21C)  | 109.5    |
| C(6)-C(7)-H(7)      | 119.4    | H(21A)-C(21)-H(21C) | 109.5    |
| C(1)-C(6)-C(5)      | 123.5(3) | H(21B)-C(21)-H(21C) | 109.5    |
| C(1)-C(6)-C(7)      | 118.2(4) | C(23)-C(22)-C(20)   | 121.6(4) |
| C(5)-C(6)-C(7)      | 118.2(3) | C(23)-C(22)-H(22)   | 119.2    |
| N(1)-C(9)-C(10)     | 124.4(4) | C(20)-C(22)-H(22)   | 119.2    |
| N(1)-C(9)-C(8)      | 116.0(4) | C(22)-C(23)-C(16)   | 121.4(3) |
| C(10)-C(9)-C(8)     | 119.6(4) | C(22)-C(23)-C(24)   | 117.5(4) |
| C(7)-C(8)-C(9)      | 122.2(4) | C(16)-C(23)-C(24)   | 121.1(4) |
| C(7)-C(8)-H(8)      | 118.9    | C(23)-C(24)-H(24A)  | 109.5    |
| C(9)-C(8)-H(8)      | 118.9    | C(23)-C(24)-H(24B)  | 109.5    |
| C(9)-C(10)-C(11)    | 114.6(4) | H(24A)-C(24)-H(24B) | 109.5    |
| C(9)-C(10)-C(5)     | 120.7(4) | C(23)-C(24)-H(24C)  | 109.5    |
| C(11)-C(10)-C(5)    | 124.5(4) | H(24A)-C(24)-H(24C) | 109.5    |
| C(12)-C(11)-C(10)   | 120.8(5) | H(24B)-C(24)-H(24C) | 109.5    |
| C(12)-C(11)-H(11)   | 119.6    | C(32)-C(25)-C(26)   | 117.0(3) |
| C(10)-C(11)-H(11)   | 119.6    | C(32)-C(25)-B(1)    | 121.7(3) |
| C(11)-C(12)-C(13)   | 119.5(5) | C(26)-C(25)-B(1)    | 121.2(3) |
| C(11)-C(12)-H(12)   | 120.2    | C(28)-C(26)-C(25)   | 120.3(4) |
| C(13)-C(12)-H(12)   | 120.2    | C(28)-C(26)-C(27)   | 118.1(4) |
| N(1)-C(13)-C(12)    | 122.4(5) | C(25)-C(26)-C(27)   | 121.5(3) |
| N(1)-C(13)-H(13)    | 118.8    | C(26)-C(27)-H(27A)  | 109.5    |
| C(12)-C(13)-H(13)   | 118.8    | C(26)-C(27)-H(27B)  | 109.5    |
| N(2)-C(14)-H(14A)   | 109.5    | H(27A)-C(27)-H(27B) | 109.5    |
| N(2)-C(14)-H(14B)   | 109.5    | C(26)-C(27)-H(27C)  | 109.5    |
| H(14A)-C(14)-H(14B) | 109.5    | H(27A)-C(27)-H(27C) | 109.5    |
| N(2)-C(14)-H(14C)   | 109.5    | H(27B)-C(27)-H(27C) | 109.5    |
| H(14A)-C(14)-H(14C) | 109.5    | C(26)-C(28)-C(29)   | 122.2(4) |
| H(14B)-C(14)-H(14C) | 109.5    | C(26)-C(28)-H(28)   | 118.9    |
| N(2)-C(15)-H(15A)   | 109.5    | C(29)-C(28)-H(28)   | 118.9    |
| N(2)-C(15)-H(15B)   | 109.5    | C(31)-C(29)-C(28)   | 117.8(4) |
| H(15A)-C(15)-H(15B) | 109.5    | C(31)-C(29)-C(30)   | 120.7(4) |
| N(2)-C(15)-H(15C)   | 109.5    | C(28)-C(29)-C(30)   | 121.5(4) |
| H(15A)-C(15)-H(15C) | 109.5    | C(29)-C(30)-H(30A)  | 109.5    |
| H(15B)-C(15)-H(15C) | 109.5    | C(29)-C(30)-H(30B)  | 109.5    |
| C(23)-C(16)-C(17)   | 116.0(4) | H(30A)-C(30)-H(30B) | 109.5    |
| C(23)-C(16)-B(1)    | 123.6(3) | C(29)-C(30)-H(30C)  | 109.5    |
| C(17)-C(16)-B(1)    | 120.3(4) | H(30A)-C(30)-H(30C) | 109.5    |
| C(19)-C(17)-C(16)   | 120.6(4) | H(30B)-C(30)-H(30C) | 109.5    |
| C(19)-C(17)-C(18)   | 118.6(4) | C(29)-C(31)-C(32)   | 121.7(4) |
| C(16)-C(17)-C(18)   | 120.7(4) | C(29)-C(31)-H(31)   | 119.1    |
| C(17)-C(18)-H(18A)  | 109.5    | C(32)-C(31)-H(31)   | 119.1    |

|                    |          |                     |       |
|--------------------|----------|---------------------|-------|
| C(31)-C(32)-C(25)  | 120.9(4) | H(33A)-C(33)-H(33B) | 109.5 |
| C(31)-C(32)-C(33)  | 116.4(3) | C(32)-C(33)-H(33C)  | 109.5 |
| C(25)-C(32)-C(33)  | 122.6(3) | H(33A)-C(33)-H(33C) | 109.5 |
| C(32)-C(33)-H(33A) | 109.5    | H(33B)-C(33)-H(33C) | 109.5 |
| C(32)-C(33)-H(33B) | 109.5    |                     |       |

**Table S115.** Anisotropic displacement parameters ( $\text{\AA}^2 \times 10^3$ ) for **1d**. The anisotropic displacement factor exponent takes the form:  $-2\pi^2 [h^2 a^{*2} U^{11} + \dots + 2 h k a^* b^* U^{12}]$

|       | U <sup>11</sup> | U <sup>22</sup> | U <sup>33</sup> | U <sup>23</sup> | U <sup>13</sup> | U <sup>12</sup> |
|-------|-----------------|-----------------|-----------------|-----------------|-----------------|-----------------|
| N(1)  | 72(3)           | 70(3)           | 51(2)           | -13(2)          | 4(2)            | -7(2)           |
| C(1)  | 48(2)           | 34(2)           | 45(2)           | 2(2)            | 18(2)           | 0(2)            |
| B(1)  | 55(3)           | 26(2)           | 48(3)           | -10(2)          | 29(2)           | -5(2)           |
| N(2)  | 50(2)           | 51(2)           | 58(2)           | 0(2)            | 27(2)           | -3(2)           |
| C(2)  | 56(3)           | 49(2)           | 31(2)           | -2(2)           | 16(2)           | -7(2)           |
| C(3)  | 43(2)           | 53(3)           | 44(2)           | -1(2)           | 14(2)           | -4(2)           |
| C(4)  | 42(2)           | 45(2)           | 50(2)           | 3(2)            | 25(2)           | 4(2)            |
| C(5)  | 38(2)           | 31(2)           | 34(2)           | -2(2)           | 16(2)           | 4(2)            |
| C(7)  | 53(3)           | 38(2)           | 38(2)           | 4(2)            | 21(2)           | -2(2)           |
| C(6)  | 44(2)           | 32(2)           | 42(2)           | 2(2)            | 11(2)           | 6(2)            |
| C(9)  | 60(3)           | 40(2)           | 51(3)           | -3(2)           | 6(2)            | 4(2)            |
| C(8)  | 65(3)           | 45(2)           | 42(2)           | -1(2)           | 16(2)           | -4(2)           |
| C(10) | 49(2)           | 28(2)           | 43(2)           | 1(2)            | 7(2)            | 3(2)            |
| C(11) | 52(3)           | 45(2)           | 64(3)           | -7(2)           | 15(2)           | -7(2)           |
| C(12) | 47(3)           | 64(3)           | 83(4)           | -1(3)           | 7(3)            | -5(2)           |
| C(13) | 71(4)           | 77(4)           | 65(3)           | -14(3)          | 3(3)            | -11(3)          |
| C(14) | 74(3)           | 93(4)           | 61(3)           | -14(3)          | 47(3)           | -19(3)          |
| C(15) | 75(3)           | 46(3)           | 88(4)           | -4(3)           | 46(3)           | -7(2)           |
| C(16) | 49(2)           | 25(2)           | 50(2)           | 7(2)            | 28(2)           | 3(2)            |
| C(17) | 65(3)           | 25(2)           | 57(3)           | 6(2)            | 36(2)           | 0(2)            |
| C(18) | 97(4)           | 24(2)           | 83(3)           | 5(2)            | 36(3)           | 3(2)            |
| C(19) | 65(3)           | 32(2)           | 66(3)           | 18(2)           | 33(2)           | 16(2)           |
| C(20) | 54(3)           | 43(2)           | 65(3)           | 14(2)           | 32(2)           | 9(2)            |
| C(21) | 66(3)           | 75(4)           | 92(4)           | 23(3)           | 18(3)           | 18(3)           |
| C(22) | 50(3)           | 39(2)           | 52(2)           | 3(2)            | 24(2)           | 0(2)            |
| C(23) | 49(2)           | 28(2)           | 56(3)           | 1(2)            | 32(2)           | 0(2)            |
| C(24) | 68(3)           | 25(2)           | 64(3)           | -2(2)           | 26(2)           | -3(2)           |
| C(25) | 41(2)           | 31(2)           | 40(2)           | -5(2)           | 19(2)           | -1(2)           |
| C(26) | 47(2)           | 31(2)           | 49(2)           | -2(2)           | 23(2)           | -1(2)           |
| C(27) | 75(3)           | 48(3)           | 78(3)           | 6(2)            | 50(3)           | 15(2)           |
| C(28) | 59(3)           | 51(2)           | 36(2)           | -1(2)           | 25(2)           | -6(2)           |
| C(29) | 54(3)           | 42(2)           | 36(2)           | 7(2)            | 12(2)           | -2(2)           |
| C(30) | 86(4)           | 78(4)           | 58(3)           | 30(3)           | 28(3)           | 11(3)           |
| C(31) | 46(2)           | 33(2)           | 47(2)           | 0(2)            | 10(2)           | 2(2)            |
| C(32) | 44(2)           | 32(2)           | 41(2)           | -6(2)           | 14(2)           | -2(2)           |
| C(33) | 62(3)           | 50(3)           | 69(3)           | -2(2)           | 37(2)           | 13(2)           |

**Table S116.** Hydrogen coordinates ( $\times 10^4$ ) and isotropic displacement parameters ( $\text{\AA}^2 \times 10^3$ ) for **1d**.

|  | x | y | z | U(eq) |
|--|---|---|---|-------|
|--|---|---|---|-------|

|        |      |       |      |     |
|--------|------|-------|------|-----|
| H(2)   | 2747 | 2449  | 5564 | 54  |
| H(3)   | 1921 | 1240  | 5883 | 56  |
| H(7)   | 2262 | 1898  | 2409 | 50  |
| H(8)   | 1465 | 739   | 1234 | 62  |
| H(11)  | 131  | -303  | 3407 | 66  |
| H(12)  | -666 | -1144 | 2088 | 82  |
| H(13)  | -474 | -1232 | 686  | 92  |
| H(14A) | 855  | 1151  | 5795 | 105 |
| H(14B) | 1284 | -409  | 6198 | 105 |
| H(14C) | 515  | -556  | 5768 | 105 |
| H(15A) | 901  | -2290 | 4009 | 98  |
| H(15B) | 566  | -2559 | 4766 | 98  |
| H(15C) | 1335 | -2540 | 5072 | 98  |
| H(18A) | 3238 | -102  | 3776 | 100 |
| H(18B) | 3127 | -759  | 4684 | 100 |
| H(18C) | 3723 | -1399 | 4421 | 100 |
| H(19)  | 4560 | -597  | 5766 | 62  |
| H(21A) | 5772 | 753   | 6741 | 120 |
| H(21B) | 5347 | 395   | 7375 | 120 |
| H(21C) | 5633 | 2158  | 7356 | 120 |
| H(22)  | 4977 | 4065  | 6338 | 55  |
| H(24A) | 4168 | 5800  | 4601 | 77  |
| H(24B) | 4243 | 6092  | 5659 | 77  |
| H(24C) | 3550 | 5699  | 4911 | 77  |
| H(27A) | 3558 | 1856  | 2685 | 91  |
| H(27B) | 4144 | 2891  | 3357 | 91  |
| H(27C) | 3970 | 2992  | 2262 | 91  |
| H(28)  | 3544 | 5416  | 1703 | 56  |
| H(30A) | 2838 | 7657  | 729  | 110 |
| H(30B) | 3227 | 8800  | 1572 | 110 |
| H(30C) | 2456 | 8750  | 1220 | 110 |
| H(31)  | 2214 | 7699  | 2476 | 52  |
| H(33A) | 1929 | 6908  | 3674 | 84  |
| H(33B) | 2320 | 5528  | 4365 | 84  |
| H(33C) | 1709 | 5071  | 3478 | 84  |

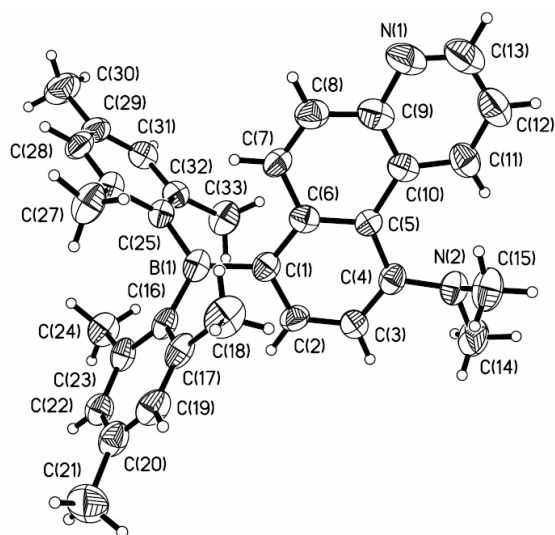

Figure S160. Structure of **1d**.

**Table S117.** Crystal data and structure refinement for **2d**.

|                                   |                                                  |                  |
|-----------------------------------|--------------------------------------------------|------------------|
| Identification code               | <b>2d</b>                                        |                  |
| Empirical formula                 | C <sub>34</sub> H <sub>37</sub> B N <sub>2</sub> |                  |
| Formula weight                    | 484.46                                           |                  |
| Temperature                       | 180(2) K                                         |                  |
| Wavelength                        | 0.71073 Å                                        |                  |
| Crystal system                    | Monoclinic                                       |                  |
| Space group                       | P2 <sub>1</sub> /c                               |                  |
| Unit cell dimensions              | a = 22.653(2) Å                                  | α = 90°.         |
|                                   | b = 8.3251(7) Å                                  | β = 107.682(3)°. |
|                                   | c = 15.2916(13) Å                                | γ = 90°.         |
| Volume                            | 2747.6(4) Å <sup>3</sup>                         |                  |
| Z                                 | 4                                                |                  |
| Density (calculated)              | 1.171 Mg/m <sup>3</sup>                          |                  |
| Absorption coefficient            | 0.067 mm <sup>-1</sup>                           |                  |
| F(000)                            | 1040                                             |                  |
| Crystal size                      | 0.120 x 0.081 x 0.075 mm <sup>3</sup>            |                  |
| Theta range for data collection   | 2.622 to 27.122°.                                |                  |
| Index ranges                      | -29 ≤ h ≤ 29, -10 ≤ k ≤ 10, -19 ≤ l ≤ 19         |                  |
| Reflections collected             | 25922                                            |                  |
| Independent reflections           | 6057 [R(int) = 0.1291]                           |                  |
| Completeness to theta = 25.242°   | 99.8 %                                           |                  |
| Absorption correction             | Semi-empirical from equivalents                  |                  |
| Max. and min. transmission        | 0.995 and 0.992                                  |                  |
| Refinement method                 | Full-matrix least-squares on F <sup>2</sup>      |                  |
| Data / restraints / parameters    | 6057 / 0 / 344                                   |                  |
| Goodness-of-fit on F <sup>2</sup> | 1.014                                            |                  |
| Final R indices [I > 2σ(I)]       | R1 = 0.0642, wR2 = 0.1199                        |                  |
| R indices (all data)              | R1 = 0.1462, wR2 = 0.1471                        |                  |
| Extinction coefficient            | 0.0055(7)                                        |                  |
| Largest diff. peak and hole       | 0.247 and -0.214 e.Å <sup>-3</sup>               |                  |

**Table S118.** Atomic coordinates (x 10<sup>4</sup>) and equivalent isotropic displacement parameters (Å<sup>2</sup> x 10<sup>-3</sup>) for **2d**. U(eq) is defined as one third of the trace of the orthogonalized U<sup>ij</sup> tensor.

|       | x       | y        | z       | U(eq) |
|-------|---------|----------|---------|-------|
| N(1)  | 4499(1) | -321(2)  | 8573(1) | 31(1) |
| N(2)  | 3922(1) | -516(2)  | 4915(1) | 30(1) |
| C(1)  | 2507(1) | 2008(3)  | 5672(2) | 27(1) |
| C(2)  | 2511(1) | 1852(3)  | 4773(2) | 33(1) |
| C(3)  | 2979(1) | 1070(3)  | 4533(2) | 32(1) |
| C(4)  | 3471(1) | 363(3)   | 5187(2) | 26(1) |
| C(5)  | 3520(1) | 534(3)   | 6143(2) | 25(1) |
| C(6)  | 3022(1) | 1328(2)  | 6362(2) | 25(1) |
| C(7)  | 3028(1) | 1387(3)  | 7303(2) | 29(1) |
| C(8)  | 3494(1) | 799(3)   | 7990(2) | 30(1) |
| C(9)  | 4028(1) | 141(3)   | 7817(2) | 26(1) |
| C(10) | 4054(1) | 30(3)    | 6905(2) | 26(1) |
| C(11) | 4630(1) | -482(3)  | 6828(2) | 33(1) |
| C(12) | 5104(1) | -896(3)  | 7588(2) | 38(1) |
| C(13) | 5023(1) | -848(3)  | 8461(2) | 32(1) |
| C(14) | 5518(1) | -1381(3) | 9305(2) | 38(1) |

|       |         |          |         |       |
|-------|---------|----------|---------|-------|
| C(15) | 3977(1) | -175(3)  | 4004(2) | 43(1) |
| C(16) | 3916(1) | -2251(3) | 5067(2) | 48(1) |
| C(17) | 1288(1) | 2472(3)  | 5160(2) | 26(1) |
| C(18) | 865(1)  | 3653(3)  | 4678(2) | 28(1) |
| C(19) | 984(1)  | 5434(3)  | 4852(2) | 39(1) |
| C(20) | 321(1)  | 3207(3)  | 4018(2) | 35(1) |
| C(21) | 158(1)  | 1616(3)  | 3814(2) | 38(1) |
| C(22) | -426(1) | 1166(4)  | 3073(2) | 62(1) |
| C(23) | 556(1)  | 454(3)   | 4321(2) | 39(1) |
| C(24) | 1112(1) | 836(3)   | 4975(2) | 33(1) |
| C(25) | 1506(1) | -523(3)  | 5495(2) | 48(1) |
| C(26) | 2012(1) | 4232(3)  | 6604(2) | 25(1) |
| C(27) | 2429(1) | 5528(3)  | 6690(2) | 29(1) |
| C(28) | 2874(1) | 5652(3)  | 6128(2) | 47(1) |
| C(29) | 2437(1) | 6787(3)  | 7294(2) | 31(1) |
| C(30) | 2057(1) | 6806(3)  | 7845(2) | 33(1) |
| C(31) | 2073(1) | 8175(3)  | 8499(2) | 55(1) |
| C(32) | 1660(1) | 5510(3)  | 7790(2) | 35(1) |
| C(33) | 1627(1) | 4248(3)  | 7180(2) | 30(1) |
| C(34) | 1187(1) | 2880(3)  | 7178(2) | 45(1) |
| B(1)  | 1942(1) | 2898(3)  | 5846(2) | 27(1) |

**Table S119.** Bond lengths [Å] and angles [°] for **2d**.

|              |          |              |          |
|--------------|----------|--------------|----------|
| N(1)-C(13)   | 1.326(3) | C(15)-H(15B) | 0.9800   |
| N(1)-C(9)    | 1.368(3) | C(15)-H(15C) | 0.9800   |
| N(2)-C(4)    | 1.419(3) | C(16)-H(16A) | 0.9800   |
| N(2)-C(15)   | 1.462(3) | C(16)-H(16B) | 0.9800   |
| N(2)-C(16)   | 1.464(3) | C(16)-H(16C) | 0.9800   |
| C(1)-C(2)    | 1.383(3) | C(17)-C(18)  | 1.414(3) |
| C(1)-C(6)    | 1.431(3) | C(17)-C(24)  | 1.424(3) |
| C(1)-B(1)    | 1.569(4) | C(17)-B(1)   | 1.574(3) |
| C(2)-C(3)    | 1.386(3) | C(18)-C(20)  | 1.385(3) |
| C(2)-H(2)    | 0.9500   | C(18)-C(19)  | 1.517(3) |
| C(3)-C(4)    | 1.383(3) | C(19)-H(19A) | 0.9800   |
| C(3)-H(3)    | 0.9500   | C(19)-H(19B) | 0.9800   |
| C(4)-C(5)    | 1.439(3) | C(19)-H(19C) | 0.9800   |
| C(5)-C(6)    | 1.432(3) | C(20)-C(21)  | 1.385(3) |
| C(5)-C(10)   | 1.463(3) | C(20)-H(20)  | 0.9500   |
| C(6)-C(7)    | 1.436(3) | C(21)-C(23)  | 1.387(3) |
| C(7)-C(8)    | 1.337(3) | C(21)-C(22)  | 1.505(3) |
| C(7)-H(7)    | 0.9500   | C(22)-H(22A) | 0.9800   |
| C(8)-C(9)    | 1.423(3) | C(22)-H(22B) | 0.9800   |
| C(8)-H(8)    | 0.9500   | C(22)-H(22C) | 0.9800   |
| C(9)-C(10)   | 1.417(3) | C(23)-C(24)  | 1.387(3) |
| C(10)-C(11)  | 1.412(3) | C(23)-H(23)  | 0.9500   |
| C(11)-C(12)  | 1.365(3) | C(24)-C(25)  | 1.508(3) |
| C(11)-H(11)  | 0.9500   | C(25)-H(25A) | 0.9800   |
| C(12)-C(13)  | 1.401(3) | C(25)-H(25B) | 0.9800   |
| C(12)-H(12)  | 0.9500   | C(25)-H(25C) | 0.9800   |
| C(13)-C(14)  | 1.496(3) | C(26)-C(27)  | 1.414(3) |
| C(14)-H(14A) | 0.9800   | C(26)-C(33)  | 1.416(3) |
| C(14)-H(14B) | 0.9800   | C(26)-B(1)   | 1.578(3) |
| C(14)-H(14C) | 0.9800   | C(27)-C(29)  | 1.394(3) |
| C(15)-H(15A) | 0.9800   | C(27)-C(28)  | 1.513(3) |

|                   |            |                     |            |
|-------------------|------------|---------------------|------------|
| C(28)-H(28A)      | 0.9800     | N(1)-C(13)-C(12)    | 120.9(2)   |
| C(28)-H(28B)      | 0.9800     | N(1)-C(13)-C(14)    | 116.9(2)   |
| C(28)-H(28C)      | 0.9800     | C(12)-C(13)-C(14)   | 122.2(2)   |
| C(29)-C(30)       | 1.376(3)   | C(13)-C(14)-H(14A)  | 109.5      |
| C(29)-H(29)       | 0.9500     | C(13)-C(14)-H(14B)  | 109.5      |
| C(30)-C(32)       | 1.390(3)   | H(14A)-C(14)-H(14B) | 109.5      |
| C(30)-C(31)       | 1.509(3)   | C(13)-C(14)-H(14C)  | 109.5      |
| C(31)-H(31A)      | 0.9800     | H(14A)-C(14)-H(14C) | 109.5      |
| C(31)-H(31B)      | 0.9800     | H(14B)-C(14)-H(14C) | 109.5      |
| C(31)-H(31C)      | 0.9800     | N(2)-C(15)-H(15A)   | 109.5      |
| C(32)-C(33)       | 1.392(3)   | N(2)-C(15)-H(15B)   | 109.5      |
| C(32)-H(32)       | 0.9500     | H(15A)-C(15)-H(15B) | 109.5      |
| C(33)-C(34)       | 1.514(3)   | N(2)-C(15)-H(15C)   | 109.5      |
| C(34)-H(34A)      | 0.9800     | H(15A)-C(15)-H(15C) | 109.5      |
| C(34)-H(34B)      | 0.9800     | H(15B)-C(15)-H(15C) | 109.5      |
| C(34)-H(34C)      | 0.9800     | N(2)-C(16)-H(16A)   | 109.5      |
| C(13)-N(1)-C(9)   | 118.9(2)   | N(2)-C(16)-H(16B)   | 109.5      |
| C(4)-N(2)-C(15)   | 117.18(19) | H(16A)-C(16)-H(16B) | 109.5      |
| C(4)-N(2)-C(16)   | 114.80(19) | N(2)-C(16)-H(16C)   | 109.5      |
| C(15)-N(2)-C(16)  | 110.5(2)   | H(16A)-C(16)-H(16C) | 109.5      |
| C(2)-C(1)-C(6)    | 116.5(2)   | H(16B)-C(16)-H(16C) | 109.5      |
| C(2)-C(1)-B(1)    | 117.7(2)   | C(18)-C(17)-C(24)   | 117.2(2)   |
| C(6)-C(1)-B(1)    | 125.8(2)   | C(18)-C(17)-B(1)    | 122.90(19) |
| C(1)-C(2)-C(3)    | 122.9(2)   | C(24)-C(17)-B(1)    | 119.9(2)   |
| C(1)-C(2)-H(2)    | 118.5      | C(20)-C(18)-C(17)   | 120.4(2)   |
| C(3)-C(2)-H(2)    | 118.5      | C(20)-C(18)-C(19)   | 117.5(2)   |
| C(4)-C(3)-C(2)    | 121.4(2)   | C(17)-C(18)-C(19)   | 122.1(2)   |
| C(4)-C(3)-H(3)    | 119.3      | C(18)-C(19)-H(19A)  | 109.5      |
| C(2)-C(3)-H(3)    | 119.3      | C(18)-C(19)-H(19B)  | 109.5      |
| C(3)-C(4)-N(2)    | 120.1(2)   | H(19A)-C(19)-H(19B) | 109.5      |
| C(3)-C(4)-C(5)    | 119.3(2)   | C(18)-C(19)-H(19C)  | 109.5      |
| N(2)-C(4)-C(5)    | 120.6(2)   | H(19A)-C(19)-H(19C) | 109.5      |
| C(6)-C(5)-C(4)    | 117.4(2)   | H(19B)-C(19)-H(19C) | 109.5      |
| C(6)-C(5)-C(10)   | 117.8(2)   | C(18)-C(20)-C(21)   | 122.5(2)   |
| C(4)-C(5)-C(10)   | 124.7(2)   | C(18)-C(20)-H(20)   | 118.8      |
| C(1)-C(6)-C(5)    | 122.2(2)   | C(21)-C(20)-H(20)   | 118.8      |
| C(1)-C(6)-C(7)    | 118.9(2)   | C(20)-C(21)-C(23)   | 117.3(2)   |
| C(5)-C(6)-C(7)    | 118.8(2)   | C(20)-C(21)-C(22)   | 121.4(2)   |
| C(8)-C(7)-C(6)    | 122.6(2)   | C(23)-C(21)-C(22)   | 121.4(2)   |
| C(8)-C(7)-H(7)    | 118.7      | C(21)-C(22)-H(22A)  | 109.5      |
| C(6)-C(7)-H(7)    | 118.7      | C(21)-C(22)-H(22B)  | 109.5      |
| C(7)-C(8)-C(9)    | 120.6(2)   | H(22A)-C(22)-H(22B) | 109.5      |
| C(7)-C(8)-H(8)    | 119.7      | C(21)-C(22)-H(22C)  | 109.5      |
| C(9)-C(8)-H(8)    | 119.7      | H(22A)-C(22)-H(22C) | 109.5      |
| N(1)-C(9)-C(10)   | 124.0(2)   | H(22B)-C(22)-H(22C) | 109.5      |
| N(1)-C(9)-C(8)    | 116.1(2)   | C(21)-C(23)-C(24)   | 122.5(2)   |
| C(10)-C(9)-C(8)   | 119.9(2)   | C(21)-C(23)-H(23)   | 118.8      |
| C(11)-C(10)-C(9)  | 114.6(2)   | C(24)-C(23)-H(23)   | 118.8      |
| C(11)-C(10)-C(5)  | 125.6(2)   | C(23)-C(24)-C(17)   | 120.0(2)   |
| C(9)-C(10)-C(5)   | 119.6(2)   | C(23)-C(24)-C(25)   | 118.1(2)   |
| C(12)-C(11)-C(10) | 120.9(2)   | C(17)-C(24)-C(25)   | 121.8(2)   |
| C(12)-C(11)-H(11) | 119.6      | C(24)-C(25)-H(25A)  | 109.5      |
| C(10)-C(11)-H(11) | 119.6      | C(24)-C(25)-H(25B)  | 109.5      |
| C(11)-C(12)-C(13) | 120.5(2)   | H(25A)-C(25)-H(25B) | 109.5      |
| C(11)-C(12)-H(12) | 119.7      | C(24)-C(25)-H(25C)  | 109.5      |
| C(13)-C(12)-H(12) | 119.7      | H(25A)-C(25)-H(25C) | 109.5      |

|                     |          |                     |          |
|---------------------|----------|---------------------|----------|
| H(25B)-C(25)-H(25C) | 109.5    | C(30)-C(31)-H(31B)  | 109.5    |
| C(27)-C(26)-C(33)   | 117.1(2) | H(31A)-C(31)-H(31B) | 109.5    |
| C(27)-C(26)-B(1)    | 121.4(2) | C(30)-C(31)-H(31C)  | 109.5    |
| C(33)-C(26)-B(1)    | 121.4(2) | H(31A)-C(31)-H(31C) | 109.5    |
| C(29)-C(27)-C(26)   | 120.6(2) | H(31B)-C(31)-H(31C) | 109.5    |
| C(29)-C(27)-C(28)   | 116.6(2) | C(30)-C(32)-C(33)   | 121.9(2) |
| C(26)-C(27)-C(28)   | 122.7(2) | C(30)-C(32)-H(32)   | 119.0    |
| C(27)-C(28)-H(28A)  | 109.5    | C(33)-C(32)-H(32)   | 119.0    |
| C(27)-C(28)-H(28B)  | 109.5    | C(32)-C(33)-C(26)   | 120.5(2) |
| H(28A)-C(28)-H(28B) | 109.5    | C(32)-C(33)-C(34)   | 118.1(2) |
| C(27)-C(28)-H(28C)  | 109.5    | C(26)-C(33)-C(34)   | 121.5(2) |
| H(28A)-C(28)-H(28C) | 109.5    | C(33)-C(34)-H(34A)  | 109.5    |
| H(28B)-C(28)-H(28C) | 109.5    | C(33)-C(34)-H(34B)  | 109.5    |
| C(30)-C(29)-C(27)   | 122.1(2) | H(34A)-C(34)-H(34B) | 109.5    |
| C(30)-C(29)-H(29)   | 119.0    | C(33)-C(34)-H(34C)  | 109.5    |
| C(27)-C(29)-H(29)   | 119.0    | H(34A)-C(34)-H(34C) | 109.5    |
| C(29)-C(30)-C(32)   | 117.8(2) | H(34B)-C(34)-H(34C) | 109.5    |
| C(29)-C(30)-C(31)   | 121.4(2) | C(1)-B(1)-C(17)     | 115.6(2) |
| C(32)-C(30)-C(31)   | 120.8(2) | C(1)-B(1)-C(26)     | 123.5(2) |
| C(30)-C(31)-H(31A)  | 109.5    | C(17)-B(1)-C(26)    | 120.8(2) |

**Table S120.** Anisotropic displacement parameters ( $\text{\AA}^2 \times 10^3$ ) for **2d**. The anisotropic displacement factor exponent takes the form:  $-2\pi^2 [h^2 a^*2U^{11} + \dots + 2 h k a^* b^* U^{12}]$

|       | U <sup>11</sup> | U <sup>22</sup> | U <sup>33</sup> | U <sup>23</sup> | U <sup>13</sup> | U <sup>12</sup> |
|-------|-----------------|-----------------|-----------------|-----------------|-----------------|-----------------|
| N(1)  | 32(1)           | 32(1)           | 30(1)           | 1(1)            | 10(1)           | 5(1)            |
| N(2)  | 32(1)           | 34(1)           | 29(1)           | -2(1)           | 17(1)           | 1(1)            |
| C(1)  | 29(1)           | 28(1)           | 25(1)           | -5(1)           | 8(1)            | -1(1)           |
| C(2)  | 27(1)           | 39(1)           | 29(1)           | -2(1)           | 3(1)            | 7(1)            |
| C(3)  | 34(1)           | 41(1)           | 22(1)           | -4(1)           | 9(1)            | 0(1)            |
| C(4)  | 24(1)           | 28(1)           | 28(1)           | -5(1)           | 12(1)           | -4(1)           |
| C(5)  | 25(1)           | 23(1)           | 28(1)           | -2(1)           | 11(1)           | -1(1)           |
| C(6)  | 26(1)           | 22(1)           | 27(1)           | -3(1)           | 10(1)           | 0(1)            |
| C(7)  | 30(1)           | 33(1)           | 27(1)           | -1(1)           | 12(1)           | 4(1)            |
| C(8)  | 34(1)           | 33(1)           | 25(1)           | -1(1)           | 14(1)           | 6(1)            |
| C(9)  | 28(1)           | 24(1)           | 27(1)           | 2(1)            | 10(1)           | 1(1)            |
| C(10) | 26(1)           | 24(1)           | 29(1)           | 1(1)            | 11(1)           | -1(1)           |
| C(11) | 33(1)           | 42(1)           | 29(1)           | 4(1)            | 16(1)           | 7(1)            |
| C(12) | 31(1)           | 50(2)           | 37(2)           | 4(1)            | 15(1)           | 12(1)           |
| C(13) | 32(1)           | 31(1)           | 32(1)           | 3(1)            | 9(1)            | 5(1)            |
| C(14) | 35(2)           | 44(2)           | 34(1)           | 2(1)            | 9(1)            | 11(1)           |
| C(15) | 39(2)           | 66(2)           | 30(1)           | -2(1)           | 20(1)           | 2(1)            |
| C(16) | 56(2)           | 35(2)           | 65(2)           | -8(1)           | 38(2)           | 1(1)            |
| C(17) | 29(1)           | 23(1)           | 28(1)           | -2(1)           | 14(1)           | 0(1)            |
| C(18) | 26(1)           | 27(1)           | 33(1)           | -1(1)           | 13(1)           | -1(1)           |
| C(19) | 42(2)           | 25(1)           | 46(2)           | 6(1)            | 9(1)            | 3(1)            |
| C(20) | 28(1)           | 40(2)           | 37(1)           | 1(1)            | 9(1)            | 3(1)            |
| C(21) | 29(1)           | 45(2)           | 40(2)           | -11(1)          | 13(1)           | -7(1)           |
| C(22) | 40(2)           | 71(2)           | 64(2)           | -18(2)          | 0(2)            | -12(2)          |
| C(23) | 39(2)           | 31(1)           | 51(2)           | -13(1)          | 20(1)           | -11(1)          |
| C(24) | 36(2)           | 28(1)           | 38(1)           | -5(1)           | 16(1)           | 0(1)            |
| C(25) | 58(2)           | 23(1)           | 61(2)           | 2(1)            | 14(2)           | 2(1)            |
| C(26) | 23(1)           | 26(1)           | 25(1)           | 2(1)            | 6(1)            | 2(1)            |

|       |       |       |       |        |       |        |
|-------|-------|-------|-------|--------|-------|--------|
| C(27) | 26(1) | 31(1) | 30(1) | 2(1)   | 8(1)  | 1(1)   |
| C(28) | 51(2) | 44(2) | 56(2) | -6(1)  | 31(2) | -14(1) |
| C(29) | 29(1) | 28(1) | 33(1) | 2(1)   | 4(1)  | 0(1)   |
| C(30) | 34(2) | 31(1) | 31(1) | -2(1)  | 6(1)  | 4(1)   |
| C(31) | 59(2) | 55(2) | 51(2) | -23(2) | 16(2) | -1(2)  |
| C(32) | 34(1) | 44(2) | 30(1) | 0(1)   | 15(1) | 7(1)   |
| C(33) | 28(1) | 32(1) | 30(1) | 3(1)   | 11(1) | 2(1)   |
| C(34) | 48(2) | 45(2) | 51(2) | -2(1)  | 30(1) | -11(1) |
| B(1)  | 32(2) | 23(1) | 28(2) | 7(1)   | 11(1) | 1(1)   |

**Table S121.** Hydrogen coordinates ( $\times 10^4$ ) and isotropic displacement parameters ( $\text{\AA}^2 \times 10^3$ ) for **2d**.

|        | x    | y     | z    | U(eq) |
|--------|------|-------|------|-------|
| H(2)   | 2178 | 2301  | 4299 | 39    |
| H(3)   | 2961 | 1018  | 3905 | 39    |
| H(7)   | 2686 | 1863  | 7443 | 35    |
| H(8)   | 3470 | 820   | 8599 | 35    |
| H(11)  | 4689 | -538  | 6240 | 40    |
| H(12)  | 5491 | -1220 | 7525 | 46    |
| H(14A) | 5474 | -2534 | 9397 | 57    |
| H(14B) | 5478 | -789  | 9837 | 57    |
| H(14C) | 5926 | -1169 | 9231 | 57    |
| H(15A) | 3614 | -600  | 3534 | 65    |
| H(15B) | 4352 | -686  | 3943 | 65    |
| H(15C) | 4002 | 989   | 3925 | 65    |
| H(16A) | 3550 | -2724 | 4623 | 71    |
| H(16B) | 3902 | -2459 | 5691 | 71    |
| H(16C) | 4291 | -2733 | 4988 | 71    |
| H(19A) | 1421 | 5666  | 4933 | 58    |
| H(19B) | 883  | 5743  | 5409 | 58    |
| H(19C) | 724  | 6045  | 4328 | 58    |
| H(20)  | 50   | 4024  | 3692 | 42    |
| H(22A) | -759 | 1908  | 3087 | 93    |
| H(22B) | -545 | 67    | 3176 | 93    |
| H(22C) | -354 | 1230  | 2474 | 93    |
| H(23)  | 443  | -644  | 4217 | 46    |
| H(25A) | 1241 | -1444 | 5515 | 72    |
| H(25B) | 1724 | -172  | 6122 | 72    |
| H(25C) | 1809 | -835  | 5185 | 72    |
| H(28A) | 2672 | 5254  | 5506 | 71    |
| H(28B) | 3244 | 5006  | 6416 | 71    |
| H(28C) | 2994 | 6777  | 6099 | 71    |
| H(29)  | 2713 | 7659  | 7326 | 38    |
| H(31A) | 2395 | 8944  | 8471 | 83    |
| H(31B) | 2166 | 7756  | 9125 | 83    |
| H(31C) | 1670 | 8715  | 8326 | 83    |
| H(32)  | 1404 | 5484  | 8180 | 42    |
| H(34A) | 829  | 2943  | 6625 | 67    |
| H(34B) | 1046 | 2957  | 7723 | 67    |
| H(34C) | 1400 | 1854  | 7186 | 67    |



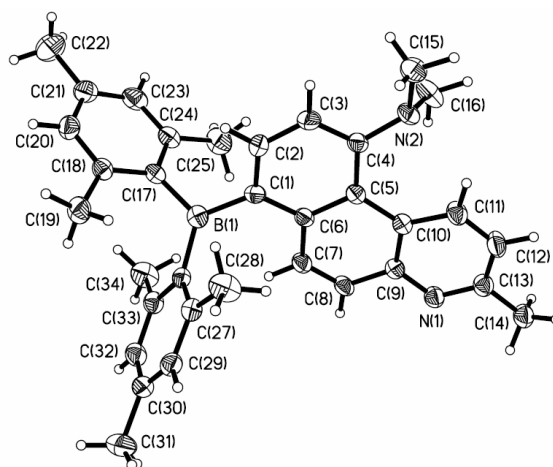

**Figure S161.** Structure of **2d**.

| <b>Table S122.</b> Crystal data and structure refinement for <b>6d</b> . |                                                                                                                                              |
|--------------------------------------------------------------------------|----------------------------------------------------------------------------------------------------------------------------------------------|
| Identification code                                                      | <b>6d</b>                                                                                                                                    |
| Empirical formula                                                        | C <sub>32</sub> H <sub>34</sub> B N S                                                                                                        |
| Formula weight                                                           | 475.47                                                                                                                                       |
| Temperature                                                              | 180(2) K                                                                                                                                     |
| Wavelength                                                               | 0.71073 Å                                                                                                                                    |
| Crystal system                                                           | Orthorhombic                                                                                                                                 |
| Space group                                                              | Pna2 <sub>1</sub>                                                                                                                            |
| Unit cell dimensions                                                     | a = 32.54(4) Å                      α = 90°.<br>b = 9.129(10) Å                     β = 90°.<br>c = 9.286(12) Å                     γ = 90°. |
| Volume                                                                   | 2759(6) Å <sup>3</sup>                                                                                                                       |
| Z                                                                        | 4                                                                                                                                            |
| Density (calculated)                                                     | 1.145 Mg/m <sup>3</sup>                                                                                                                      |
| Absorption coefficient                                                   | 0.137 mm <sup>-1</sup>                                                                                                                       |
| F(000)                                                                   | 1016                                                                                                                                         |
| Crystal size                                                             | 0.200 x 0.120 x 0.110 mm <sup>3</sup>                                                                                                        |
| Theta range for data collection                                          | 2.317 to 28.695°.                                                                                                                            |
| Index ranges                                                             | -41 ≤ h ≤ 42, -11 ≤ k ≤ 11, -11 ≤ l ≤ 11                                                                                                     |
| Reflections collected                                                    | 21468                                                                                                                                        |
| Independent reflections                                                  | 5909 [R(int) = 0.2018]                                                                                                                       |
| Completeness to theta = 25.242°                                          | 99.5 %                                                                                                                                       |
| Absorption correction                                                    | Semi-empirical from equivalents                                                                                                              |
| Max. and min. transmission                                               | 0.985 and 0.973                                                                                                                              |
| Refinement method                                                        | Full-matrix least-squares on F <sup>2</sup>                                                                                                  |
| Data / restraints / parameters                                           | 5909 / 1 / 324                                                                                                                               |
| Goodness-of-fit on F <sup>2</sup>                                        | 1.004                                                                                                                                        |
| Final R indices [I > 2σ(I)]                                              | R1 = 0.0801, wR2 = 0.1818                                                                                                                    |
| R indices (all data)                                                     | R1 = 0.1957, wR2 = 0.2266                                                                                                                    |
| Absolute structure parameter                                             | 0.03(11)                                                                                                                                     |
| Extinction coefficient                                                   | n/a                                                                                                                                          |
| Largest diff. peak and hole                                              | 0.260 and -0.320 e.Å <sup>-3</sup>                                                                                                           |

**Table S123.** Atomic coordinates (x 10<sup>4</sup>) and equivalent isotropic displacement parameters (Å<sup>2</sup> × 10<sup>3</sup>) for **6d**. U(eq) is defined as one third of the trace of the orthogonalized U<sup>ij</sup> tensor.

|       | x       | y         | z         | U(eq) |
|-------|---------|-----------|-----------|-------|
| S(1)  | 7299(1) | 2214(2)   | 9515(2)   | 50(1) |
| N(1)  | 7464(2) | 5166(8)   | 8998(7)   | 45(2) |
| B(1)  | 6141(2) | 6118(10)  | 4778(9)   | 34(2) |
| C(1)  | 6493(2) | 5754(8)   | 5891(8)   | 31(2) |
| C(2)  | 6736(2) | 6907(9)   | 6369(8)   | 35(2) |
| C(3)  | 7066(2) | 6729(8)   | 7354(8)   | 36(2) |
| C(4)  | 7146(2) | 5387(9)   | 7940(7)   | 34(2) |
| C(5)  | 6902(2) | 4110(8)   | 7547(7)   | 31(2) |
| C(6)  | 6581(2) | 4336(9)   | 6471(7)   | 34(2) |
| C(7)  | 6332(2) | 3086(9)   | 6116(8)   | 37(2) |
| C(8)  | 6387(2) | 1754(10)  | 6740(8)   | 43(2) |
| C(9)  | 6696(2) | 1521(9)   | 7833(8)   | 38(2) |
| C(10) | 6947(2) | 2735(9)   | 8196(7)   | 35(2) |
| C(11) | 7109(3) | 454(10)   | 9542(10)  | 61(2) |
| C(12) | 6786(2) | 205(9)    | 8632(8)   | 45(2) |
| C(13) | 5906(2) | 7612(8)   | 5045(8)   | 33(2) |
| C(14) | 5714(2) | 7921(9)   | 6415(8)   | 38(2) |
| C(15) | 5748(2) | 6836(10)  | 7682(9)   | 51(2) |
| C(16) | 5475(2) | 9156(9)   | 6600(9)   | 46(2) |
| C(17) | 5424(2) | 10200(10) | 5506(10)  | 48(2) |
| C(18) | 5164(3) | 11570(12) | 5737(13)  | 75(3) |
| C(19) | 5620(2) | 9927(10)  | 4188(9)   | 47(2) |
| C(20) | 5856(2) | 8701(9)   | 3960(8)   | 40(2) |
| C(21) | 6060(2) | 8523(11)  | 2483(9)   | 56(2) |
| C(22) | 6023(2) | 5087(9)   | 3473(7)   | 36(2) |
| C(23) | 5604(2) | 4750(9)   | 3153(8)   | 39(2) |
| C(24) | 5251(2) | 5398(11)  | 4042(10)  | 60(3) |
| C(25) | 5509(2) | 3803(9)   | 2063(8)   | 42(2) |
| C(26) | 5807(2) | 3179(10)  | 1158(9)   | 47(2) |
| C(27) | 5691(3) | 2138(13)  | -48(10)   | 74(3) |
| C(28) | 6213(2) | 3541(9)   | 1450(8)   | 44(2) |
| C(29) | 6329(2) | 4433(9)   | 2574(8)   | 38(2) |
| C(30) | 6786(2) | 4741(11)  | 2791(10)  | 60(3) |
| C(31) | 7867(2) | 4816(12)  | 8368(10)  | 70(3) |
| C(32) | 7495(3) | 6317(12)  | 10058(10) | 67(3) |

**Table S124.** Bond lengths [Å] and angles [°] for **6d**.

|            |           |             |           |
|------------|-----------|-------------|-----------|
| S(1)-C(11) | 1.722(10) | C(5)-C(10)  | 1.401(10) |
| S(1)-C(10) | 1.743(7)  | C(5)-C(6)   | 1.460(9)  |
| N(1)-C(32) | 1.444(11) | C(6)-C(7)   | 1.439(10) |
| N(1)-C(4)  | 1.441(8)  | C(7)-C(8)   | 1.358(11) |
| N(1)-C(31) | 1.471(9)  | C(7)-H(7)   | 0.9500    |
| B(1)-C(1)  | 1.580(10) | C(8)-C(9)   | 1.445(10) |
| B(1)-C(22) | 1.582(12) | C(8)-H(8)   | 0.9500    |
| B(1)-C(13) | 1.583(11) | C(9)-C(10)  | 1.418(11) |
| C(1)-C(2)  | 1.389(10) | C(9)-C(12)  | 1.443(11) |
| C(1)-C(6)  | 1.431(10) | C(11)-C(12) | 1.367(11) |
| C(2)-C(3)  | 1.420(10) | C(11)-H(11) | 0.9500    |
| C(2)-H(2)  | 0.9500    | C(12)-H(12) | 0.9500    |
| C(3)-C(4)  | 1.366(10) | C(13)-C(20) | 1.425(10) |
| C(3)-H(3)  | 0.9500    | C(13)-C(14) | 1.444(10) |
| C(4)-C(5)  | 1.457(10) | C(14)-C(16) | 1.381(11) |

|                  |           |                     |          |
|------------------|-----------|---------------------|----------|
| C(14)-C(15)      | 1.542(11) | C(4)-C(3)-C(2)      | 120.3(6) |
| C(15)-H(15A)     | 0.9800    | C(4)-C(3)-H(3)      | 119.9    |
| C(15)-H(15B)     | 0.9800    | C(2)-C(3)-H(3)      | 119.9    |
| C(15)-H(15C)     | 0.9800    | C(3)-C(4)-N(1)      | 122.3(6) |
| C(16)-C(17)      | 1.404(11) | C(3)-C(4)-C(5)      | 120.9(6) |
| C(16)-H(16)      | 0.9500    | N(1)-C(4)-C(5)      | 116.8(7) |
| C(17)-C(19)      | 1.403(12) | C(10)-C(5)-C(4)     | 123.5(6) |
| C(17)-C(18)      | 1.525(12) | C(10)-C(5)-C(6)     | 119.7(6) |
| C(18)-H(18A)     | 0.9800    | C(4)-C(5)-C(6)      | 116.7(7) |
| C(18)-H(18B)     | 0.9800    | C(1)-C(6)-C(7)      | 121.3(6) |
| C(18)-H(18C)     | 0.9800    | C(1)-C(6)-C(5)      | 121.9(6) |
| C(19)-C(20)      | 1.374(11) | C(7)-C(6)-C(5)      | 116.6(7) |
| C(19)-H(19)      | 0.9500    | C(8)-C(7)-C(6)      | 122.6(7) |
| C(20)-C(21)      | 1.532(11) | C(8)-C(7)-H(7)      | 118.7    |
| C(21)-H(21A)     | 0.9800    | C(6)-C(7)-H(7)      | 118.7    |
| C(21)-H(21B)     | 0.9800    | C(7)-C(8)-C(9)      | 121.5(7) |
| C(21)-H(21C)     | 0.9800    | C(7)-C(8)-H(8)      | 119.2    |
| C(22)-C(23)      | 1.429(9)  | C(9)-C(8)-H(8)      | 119.2    |
| C(22)-C(29)      | 1.430(10) | C(10)-C(9)-C(12)    | 114.2(7) |
| C(23)-C(25)      | 1.366(11) | C(10)-C(9)-C(8)     | 117.0(7) |
| C(23)-C(24)      | 1.533(10) | C(12)-C(9)-C(8)     | 128.8(7) |
| C(24)-H(24A)     | 0.9800    | C(5)-C(10)-C(9)     | 122.5(6) |
| C(24)-H(24B)     | 0.9800    | C(5)-C(10)-S(1)     | 128.0(6) |
| C(24)-H(24C)     | 0.9800    | C(9)-C(10)-S(1)     | 109.5(6) |
| C(25)-C(26)      | 1.405(11) | C(12)-C(11)-S(1)    | 115.0(7) |
| C(25)-H(25)      | 0.9500    | C(12)-C(11)-H(11)   | 122.5    |
| C(26)-C(28)      | 1.387(10) | S(1)-C(11)-H(11)    | 122.5    |
| C(26)-C(27)      | 1.517(12) | C(11)-C(12)-C(9)    | 109.7(8) |
| C(27)-H(27A)     | 0.9800    | C(11)-C(12)-H(12)   | 125.2    |
| C(27)-H(27B)     | 0.9800    | C(9)-C(12)-H(12)    | 125.2    |
| C(27)-H(27C)     | 0.9800    | C(20)-C(13)-C(14)   | 116.0(7) |
| C(28)-C(29)      | 1.377(10) | C(20)-C(13)-B(1)    | 123.0(7) |
| C(28)-H(28)      | 0.9500    | C(14)-C(13)-B(1)    | 121.0(6) |
| C(29)-C(30)      | 1.527(9)  | C(16)-C(14)-C(13)   | 120.8(7) |
| C(30)-H(30A)     | 0.9800    | C(16)-C(14)-C(15)   | 118.0(7) |
| C(30)-H(30B)     | 0.9800    | C(13)-C(14)-C(15)   | 121.1(7) |
| C(30)-H(30C)     | 0.9800    | C(14)-C(15)-H(15A)  | 109.5    |
| C(31)-H(00D)     | 0.9800    | C(14)-C(15)-H(15B)  | 109.5    |
| C(31)-H(00E)     | 0.9800    | H(15A)-C(15)-H(15B) | 109.5    |
| C(31)-H(00F)     | 0.9800    | C(14)-C(15)-H(15C)  | 109.5    |
| C(32)-H(00A)     | 0.9800    | H(15A)-C(15)-H(15C) | 109.5    |
| C(32)-H(00B)     | 0.9800    | H(15B)-C(15)-H(15C) | 109.5    |
| C(32)-H(00C)     | 0.9800    | C(14)-C(16)-C(17)   | 122.1(7) |
| C(11)-S(1)-C(10) | 91.6(4)   | C(14)-C(16)-H(16)   | 118.9    |
| C(32)-N(1)-C(4)  | 114.4(7)  | C(17)-C(16)-H(16)   | 118.9    |
| C(32)-N(1)-C(31) | 111.5(7)  | C(19)-C(17)-C(16)   | 117.1(7) |
| C(4)-N(1)-C(31)  | 113.5(6)  | C(19)-C(17)-C(18)   | 121.4(8) |
| C(1)-B(1)-C(22)  | 123.6(7)  | C(16)-C(17)-C(18)   | 121.4(8) |
| C(1)-B(1)-C(13)  | 115.4(7)  | C(17)-C(18)-H(18A)  | 109.5    |
| C(22)-B(1)-C(13) | 121.0(6)  | C(17)-C(18)-H(18B)  | 109.5    |
| C(2)-C(1)-C(6)   | 116.9(6)  | H(18A)-C(18)-H(18B) | 109.5    |
| C(2)-C(1)-B(1)   | 117.6(7)  | C(17)-C(18)-H(18C)  | 109.5    |
| C(6)-C(1)-B(1)   | 125.5(6)  | H(18A)-C(18)-H(18C) | 109.5    |
| C(1)-C(2)-C(3)   | 123.3(7)  | H(18B)-C(18)-H(18C) | 109.5    |
| C(1)-C(2)-H(2)   | 118.3     | C(20)-C(19)-C(17)   | 122.3(7) |
| C(3)-C(2)-H(2)   | 118.3     | C(20)-C(19)-H(19)   | 118.9    |

|                     |          |                     |       |
|---------------------|----------|---------------------|-------|
| C(17)-C(19)-H(19)   | 118.9    | H(00A)-C(32)-H(00C) | 109.5 |
| C(19)-C(20)-C(13)   | 121.5(7) | H(00B)-C(32)-H(00C) | 109.5 |
| C(19)-C(20)-C(21)   | 117.8(7) |                     |       |
| C(13)-C(20)-C(21)   | 120.7(7) |                     |       |
| C(20)-C(21)-H(21A)  | 109.5    |                     |       |
| C(20)-C(21)-H(21B)  | 109.5    |                     |       |
| H(21A)-C(21)-H(21B) | 109.5    |                     |       |
| C(20)-C(21)-H(21C)  | 109.5    |                     |       |
| H(21A)-C(21)-H(21C) | 109.5    |                     |       |
| H(21B)-C(21)-H(21C) | 109.5    |                     |       |
| C(23)-C(22)-C(29)   | 117.0(7) |                     |       |
| C(23)-C(22)-B(1)    | 121.3(6) |                     |       |
| C(29)-C(22)-B(1)    | 121.7(5) |                     |       |
| C(25)-C(23)-C(22)   | 120.4(6) |                     |       |
| C(25)-C(23)-C(24)   | 118.3(6) |                     |       |
| C(22)-C(23)-C(24)   | 121.3(7) |                     |       |
| C(23)-C(24)-H(24A)  | 109.5    |                     |       |
| C(23)-C(24)-H(24B)  | 109.5    |                     |       |
| H(24A)-C(24)-H(24B) | 109.5    |                     |       |
| C(23)-C(24)-H(24C)  | 109.5    |                     |       |
| H(24A)-C(24)-H(24C) | 109.5    |                     |       |
| H(24B)-C(24)-H(24C) | 109.5    |                     |       |
| C(23)-C(25)-C(26)   | 123.0(6) |                     |       |
| C(23)-C(25)-H(25)   | 118.5    |                     |       |
| C(26)-C(25)-H(25)   | 118.5    |                     |       |
| C(28)-C(26)-C(25)   | 116.3(7) |                     |       |
| C(28)-C(26)-C(27)   | 122.0(7) |                     |       |
| C(25)-C(26)-C(27)   | 121.6(7) |                     |       |
| C(26)-C(27)-H(27A)  | 109.5    |                     |       |
| C(26)-C(27)-H(27B)  | 109.5    |                     |       |
| H(27A)-C(27)-H(27B) | 109.5    |                     |       |
| C(26)-C(27)-H(27C)  | 109.5    |                     |       |
| H(27A)-C(27)-H(27C) | 109.5    |                     |       |
| H(27B)-C(27)-H(27C) | 109.5    |                     |       |
| C(29)-C(28)-C(26)   | 123.4(7) |                     |       |
| C(29)-C(28)-H(28)   | 118.3    |                     |       |
| C(26)-C(28)-H(28)   | 118.3    |                     |       |
| C(28)-C(29)-C(22)   | 119.9(6) |                     |       |
| C(28)-C(29)-C(30)   | 118.4(6) |                     |       |
| C(22)-C(29)-C(30)   | 121.6(7) |                     |       |
| C(29)-C(30)-H(30A)  | 109.5    |                     |       |
| C(29)-C(30)-H(30B)  | 109.5    |                     |       |
| H(30A)-C(30)-H(30B) | 109.5    |                     |       |
| C(29)-C(30)-H(30C)  | 109.5    |                     |       |
| H(30A)-C(30)-H(30C) | 109.5    |                     |       |
| H(30B)-C(30)-H(30C) | 109.5    |                     |       |
| N(1)-C(31)-H(00D)   | 109.5    |                     |       |
| N(1)-C(31)-H(00E)   | 109.5    |                     |       |
| H(00D)-C(31)-H(00E) | 109.5    |                     |       |
| N(1)-C(31)-H(00F)   | 109.5    |                     |       |
| H(00D)-C(31)-H(00F) | 109.5    |                     |       |
| H(00E)-C(31)-H(00F) | 109.5    |                     |       |
| N(1)-C(32)-H(00A)   | 109.5    |                     |       |
| N(1)-C(32)-H(00B)   | 109.5    |                     |       |
| H(00A)-C(32)-H(00B) | 109.5    |                     |       |
| N(1)-C(32)-H(00C)   | 109.5    |                     |       |

**Table S125.** Anisotropic displacement parameters ( $\text{\AA}^2 \times 10^3$ ) for **6d**. The anisotropic

displacement factor exponent takes the form:  $-2\pi^2 [h^2 a^{*2} U^{11} + \dots + 2 h k a^* b^* U^{12}]$

|       | U <sup>11</sup> | U <sup>22</sup> | U <sup>33</sup> | U <sup>23</sup> | U <sup>13</sup> | U <sup>12</sup> |
|-------|-----------------|-----------------|-----------------|-----------------|-----------------|-----------------|
| S(1)  | 60(1)           | 56(2)           | 34(1)           | -1(1)           | -10(1)          | 14(1)           |
| N(1)  | 35(3)           | 72(6)           | 30(3)           | 4(4)            | -8(3)           | -4(3)           |
| B(1)  | 22(3)           | 46(6)           | 34(5)           | 10(4)           | -1(3)           | -3(3)           |
| C(1)  | 31(3)           | 34(5)           | 28(4)           | 5(4)            | -2(3)           | 3(3)            |
| C(2)  | 37(4)           | 36(5)           | 31(4)           | 0(4)            | 3(3)            | -3(3)           |
| C(3)  | 33(3)           | 36(5)           | 39(4)           | 1(4)            | -5(3)           | -8(3)           |
| C(4)  | 30(3)           | 51(6)           | 21(4)           | -3(4)           | -1(3)           | -1(3)           |
| C(5)  | 28(3)           | 42(5)           | 23(4)           | -3(4)           | 3(3)            | 5(3)            |
| C(6)  | 31(3)           | 51(6)           | 20(4)           | -7(4)           | 4(3)            | -1(3)           |
| C(7)  | 33(4)           | 40(5)           | 38(5)           | 2(4)            | -9(3)           | 0(3)            |
| C(8)  | 43(4)           | 59(6)           | 26(4)           | -8(4)           | 0(3)            | -9(4)           |
| C(9)  | 43(4)           | 50(6)           | 21(4)           | -3(4)           | 4(3)            | 4(4)            |
| C(10) | 36(3)           | 48(5)           | 20(4)           | 5(4)            | 1(3)            | 10(3)           |
| C(11) | 88(6)           | 58(7)           | 37(5)           | 2(5)            | -1(5)           | 17(5)           |
| C(12) | 63(5)           | 34(6)           | 39(5)           | -5(4)           | 0(4)            | 7(4)            |
| C(13) | 28(3)           | 38(5)           | 32(4)           | 6(3)            | -5(3)           | -2(3)           |
| C(14) | 35(4)           | 43(5)           | 36(4)           | 3(4)            | 0(3)            | -2(3)           |
| C(15) | 54(4)           | 60(6)           | 38(5)           | 11(4)           | 15(4)           | 5(4)            |
| C(16) | 34(4)           | 54(6)           | 50(5)           | -13(5)          | 2(3)            | 4(4)            |
| C(17) | 40(4)           | 46(6)           | 58(6)           | 1(5)            | -15(4)          | 5(4)            |
| C(18) | 64(5)           | 70(8)           | 90(8)           | -23(6)          | -17(5)          | 20(5)           |
| C(19) | 43(4)           | 55(6)           | 43(5)           | 18(4)           | -13(3)          | 2(4)            |
| C(20) | 36(4)           | 43(5)           | 43(5)           | 10(4)           | -6(3)           | -7(3)           |
| C(21) | 68(5)           | 67(7)           | 35(5)           | 12(4)           | 2(4)            | 2(4)            |
| C(22) | 32(3)           | 51(6)           | 26(4)           | 5(4)            | 3(3)            | 7(3)            |
| C(23) | 35(3)           | 50(6)           | 31(4)           | -2(4)           | 0(3)            | 8(3)            |
| C(24) | 29(3)           | 87(8)           | 64(6)           | -24(5)          | 5(3)            | 3(4)            |
| C(25) | 37(4)           | 50(6)           | 40(5)           | -4(4)           | -5(3)           | -1(3)           |
| C(26) | 51(4)           | 60(7)           | 30(4)           | -4(4)           | -3(3)           | 13(4)           |
| C(27) | 62(5)           | 117(10)         | 43(6)           | -26(6)          | -1(4)           | 13(5)           |
| C(28) | 44(4)           | 55(6)           | 33(4)           | -8(4)           | 5(3)            | 9(4)            |
| C(29) | 32(3)           | 53(6)           | 30(4)           | 0(4)            | 1(3)            | 4(3)            |
| C(30) | 33(4)           | 99(8)           | 49(6)           | -21(5)          | 9(4)            | 2(4)            |

|       |       |         |       |       |        |        |
|-------|-------|---------|-------|-------|--------|--------|
| C(31) | 36(4) | 128(10) | 46(6) | 24(6) | -9(4)  | 9(5)   |
| C(32) | 80(6) | 73(8)   | 48(5) | -2(5) | -24(4) | -13(5) |

**Table S126.** Hydrogen coordinates ( $\times 10^4$ ) and isotropic displacement parameters ( $\text{\AA}^2 \times 10^3$ ) for **6d**.

|        | x    | y     | z     | U(eq) |
|--------|------|-------|-------|-------|
| H(2)   | 6679 | 7863  | 6018  | 42    |
| H(3)   | 7231 | 7547  | 7607  | 43    |
| H(7)   | 6121 | 3196  | 5418  | 45    |
| H(8)   | 6218 | 958   | 6451  | 51    |
| H(11)  | 7220 | -288  | 10145 | 74    |
| H(12)  | 6644 | -698  | 8539  | 54    |
| H(15A) | 5702 | 5837  | 7332  | 76    |
| H(15B) | 5541 | 7078  | 8411  | 76    |
| H(15C) | 6023 | 6904  | 8110  | 76    |
| H(16)  | 5341 | 9304  | 7497  | 55    |
| H(18A) | 5079 | 11966 | 4802  | 112   |
| H(18B) | 5326 | 12306 | 6255  | 112   |
| H(18C) | 4920 | 11319 | 6302  | 112   |
| H(19)  | 5589 | 10614 | 3427  | 56    |
| H(21A) | 5888 | 7898  | 1872  | 85    |
| H(21B) | 6331 | 8071  | 2601  | 85    |
| H(21C) | 6091 | 9487  | 2031  | 85    |
| H(24A) | 5232 | 6453  | 3859  | 90    |
| H(24B) | 5303 | 5230  | 5068  | 90    |
| H(24C) | 4992 | 4926  | 3767  | 90    |
| H(25)  | 5229 | 3556  | 1911  | 51    |
| H(27A) | 5675 | 2679  | -958  | 111   |
| H(27B) | 5423 | 1693  | 162   | 111   |
| H(27C) | 5899 | 1367  | -129  | 111   |
| H(28)  | 6421 | 3153  | 843   | 53    |
| H(30A) | 6943 | 4301  | 2000  | 91    |
| H(30B) | 6876 | 4317  | 3708  | 91    |
| H(30C) | 6832 | 5801  | 2804  | 91    |
| H(00D) | 7838 | 3989  | 7703  | 105   |
| H(00E) | 8060 | 4556  | 9137  | 105   |
| H(00F) | 7971 | 5671  | 7844  | 105   |
| H(00A) | 7630 | 7173  | 9628  | 100   |
| H(00B) | 7658 | 5972  | 10879 | 100   |
| H(00C) | 7220 | 6590  | 10388 | 100   |

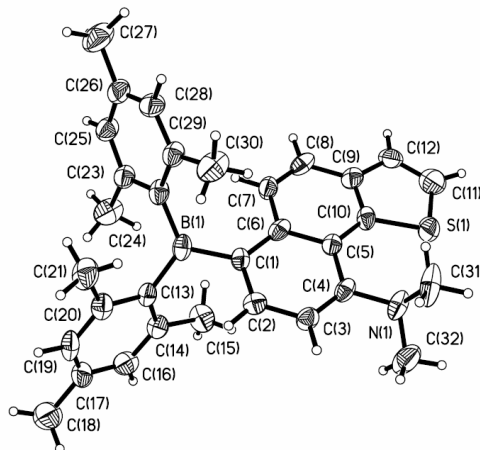

**Figure S162.** Structure of **6d**.

## S10: References

- 1) Coggins, M. K.; Toledo, S.; Shaffer, E.; Kaminsky, W.; Shearer, J.; Kovacs, J. A., *Inorg. Chem.* **2012**, *51*, 6633.
- 2) Villuendas, P.; Urriolabeitia, E. P., *Org. Lett.* **2015**, *17*, 3178.
- 3) Data used in creating the predicted UV/Vis spectra generated by GaussSum V2.2: O'Boyle, N. M.; Fivederholt, A. L.; Langner, K. M. *J. Comp. Chem.* **2008**, *29*, 839.
